# Supplementary material for: Nesting of colon and ovarian cancer cells in the endothelial niche is associated with alterations in glycan and lipid metabolism
Source: PubMed Central journal article supplement (PMC5209689; doi:10.1038/srep39999), 2017-01-04

## **Nesting of colon and ovarian cancer cells in the endothelial niche is associated with alterations in glycan and lipid metabolism.**

Anna Halama<sup>1†</sup>, Bella S Guerrouahen<sup>2,3,4†</sup>, Jennifer Pasquier<sup>2,3</sup>, Noothan J. Satheesh<sup>1†</sup>, Karsten Suhre <sup>1,5\*</sup> and Arash Rafii <sup>2,3,6\*</sup>.

†Contributed equally

1. Department of Physiology and Biophysics, Weill Cornell Medicine-Qatar, Qatar-Foundation, P.O. Box 24144, Doha, Qatar.
2. Stem Cell and Microenvironment Laboratory, Weill Cornell Medicine-Qatar, Education City, Qatar Foundation, Doha, Qatar.
3. Department of Genetic Medicine, Weill Cornell Medicine-Qatar, New York, NY 10065, USA.
4. Translational Medicine Division-Research Department, Sidra Medical and Research Center, PO Box 26999, Doha, Qatar.
5. Institute of Bioinformatics and Systems Biology, Helmholtz Zentrum München, German Research Center for Environmental Health, Neuherberg, Germany.
6. Department of Genetic Medicine and Obstetrics and Gynecology, Weill Cornell Medical College, Stem Cell and Microenvironment Laboratory, Weill Cornell Medical College in Qatar, Qatar-Foundation, P.O. Box 24144, Doha, Qatar.

Corresponding authors:

Dr. Karsten Suhre: Department of Physiology and Biophysics, Weill Cornell Medicine-Qatar, Doha, Qatar Weill Cornell Medical College in Qatar, Qatar-Foundation, P.O Box: 24144, Doha, Qatar. Phone: +974 4492 8482. Fax: +974 4492 8422. Email: [kas2049@qatar-med.cornell.edu](mailto:kas2049@qatar-med.cornell.edu)

Dr. Arash Rafii: Department of Genetic Medicine and Obstetrics and Gynecology, Weill Cornell Medicine-Qatar, Stem cell and microenvironment laboratory Weill Cornell Medical College in Qatar, Qatar-Foundation, P.O Box: 24144, Doha, Qatar. Phone: +974 3313 5828. Fax: +974 4492 8422. Email: [jat2021@qatar-med.cornell.edu](mailto:jat2021@qatar-med.cornell.edu)

1-arachidonoylglycerophosphoethanolami

1-arachidonoylglycerophosphoethanolami

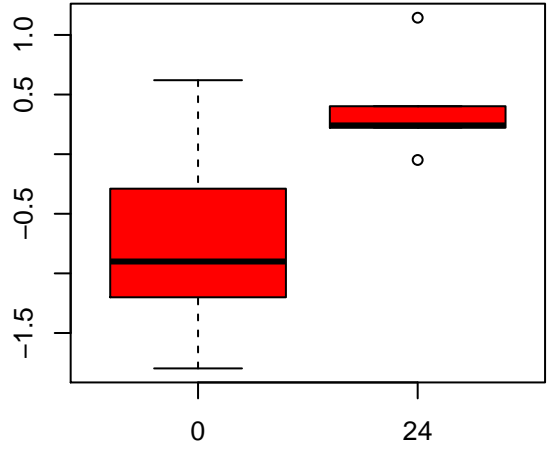

HCT116

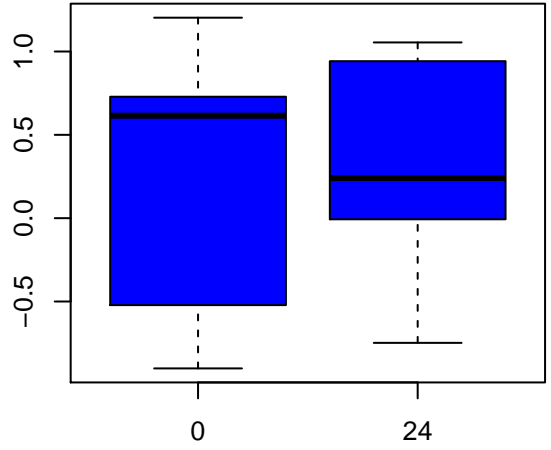

OVCAR

1-arachidonoylglycerophosphoethanolami

1-arachidonoylglycerophosphoethanolami

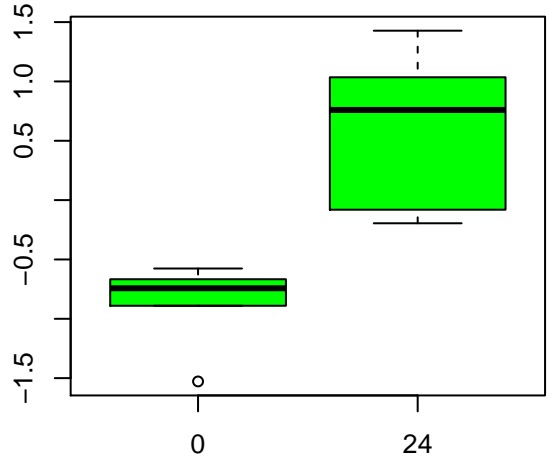

HCT15

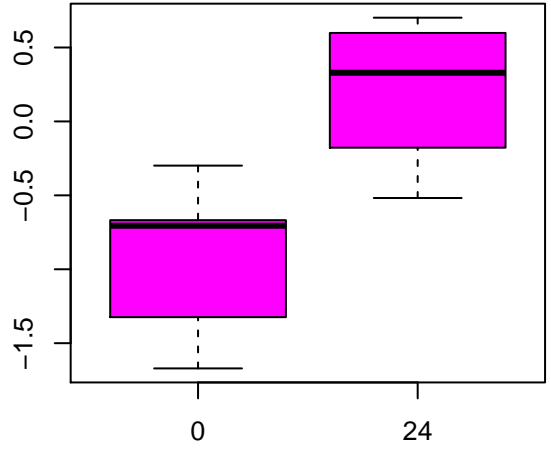

SKOV3

# 1-arachidonoylglycerophosphoethanolamine\*

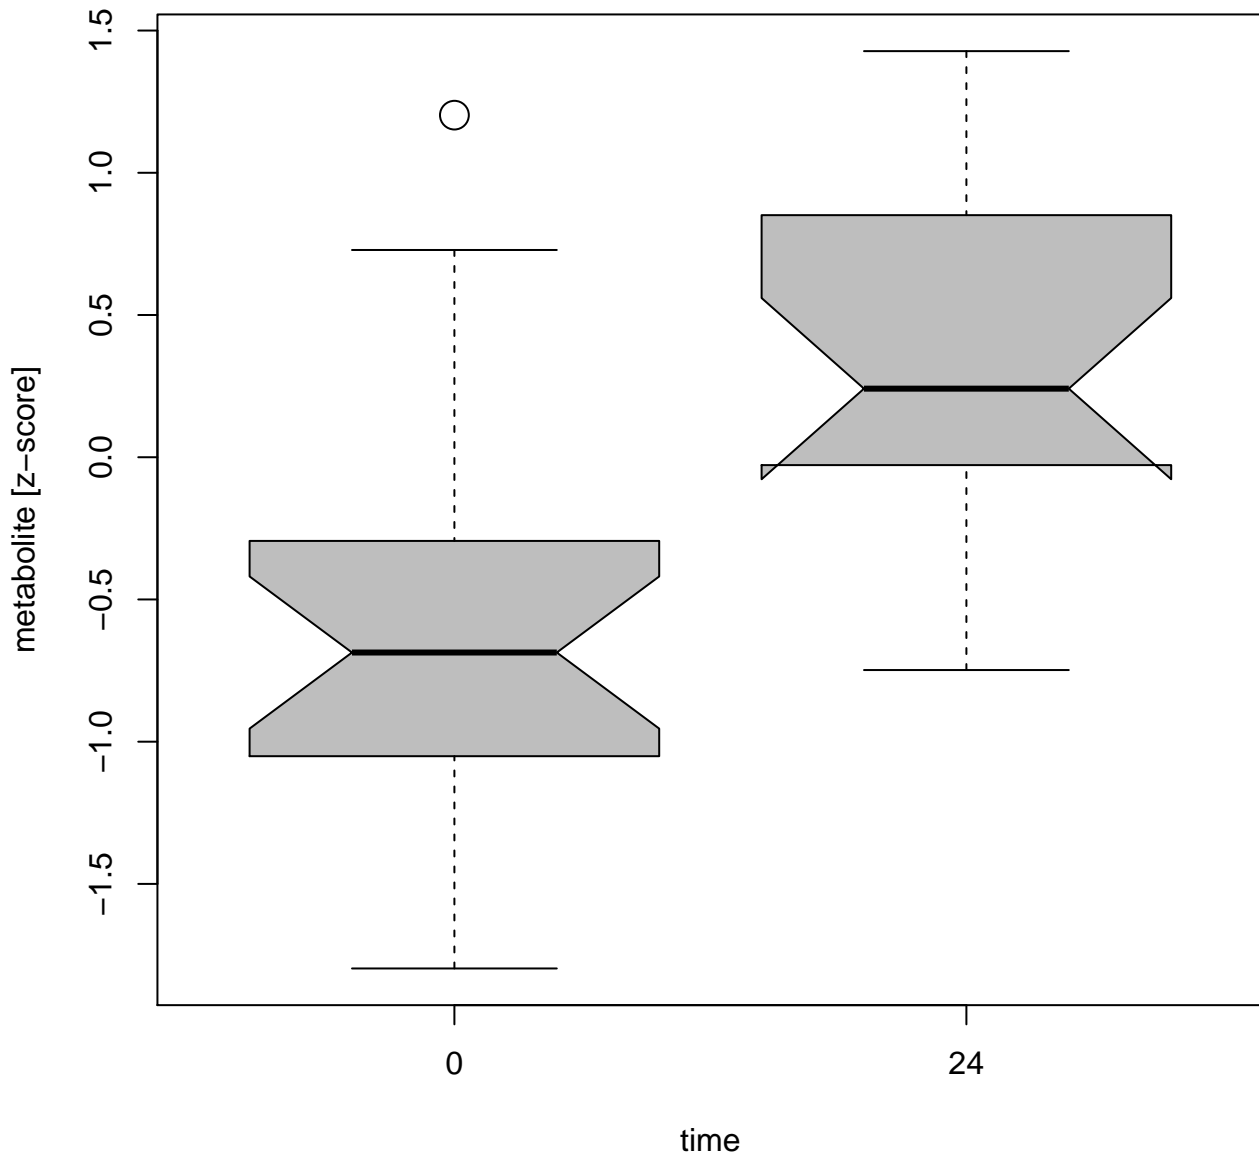

-docosahexaenoylglycerophosphoethanolol-docosahexaenoylglycerophosphoethanolol

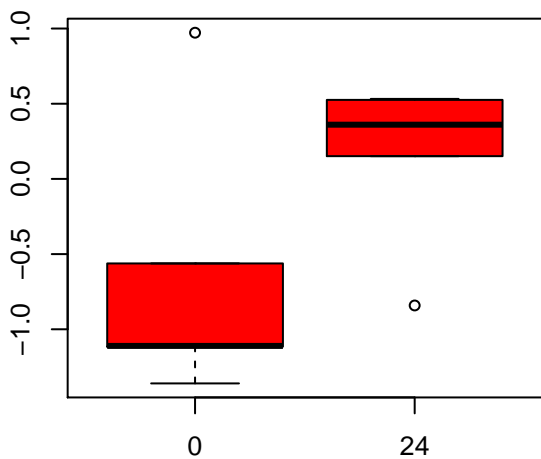

HCT116

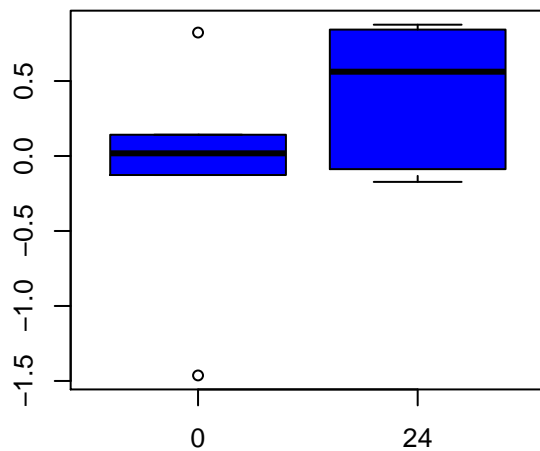

OVCAR

-docosahexaenoylglycerophosphoethanolol-docosahexaenoylglycerophosphoethanolol

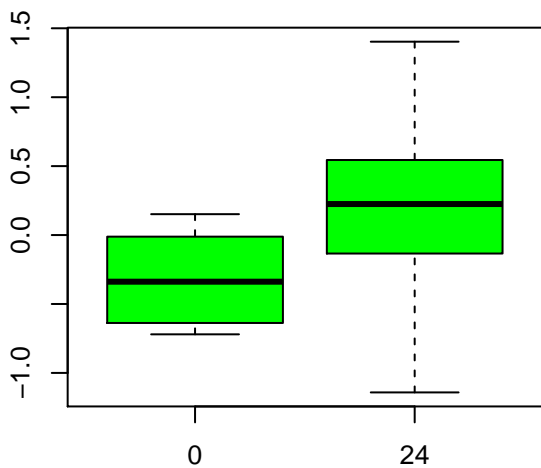

HCT15

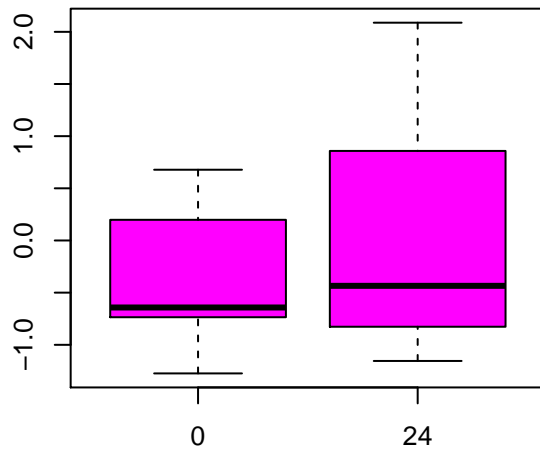

SKOV3

# 1-docosahexaenoylglycerophosphoethanolamine\*

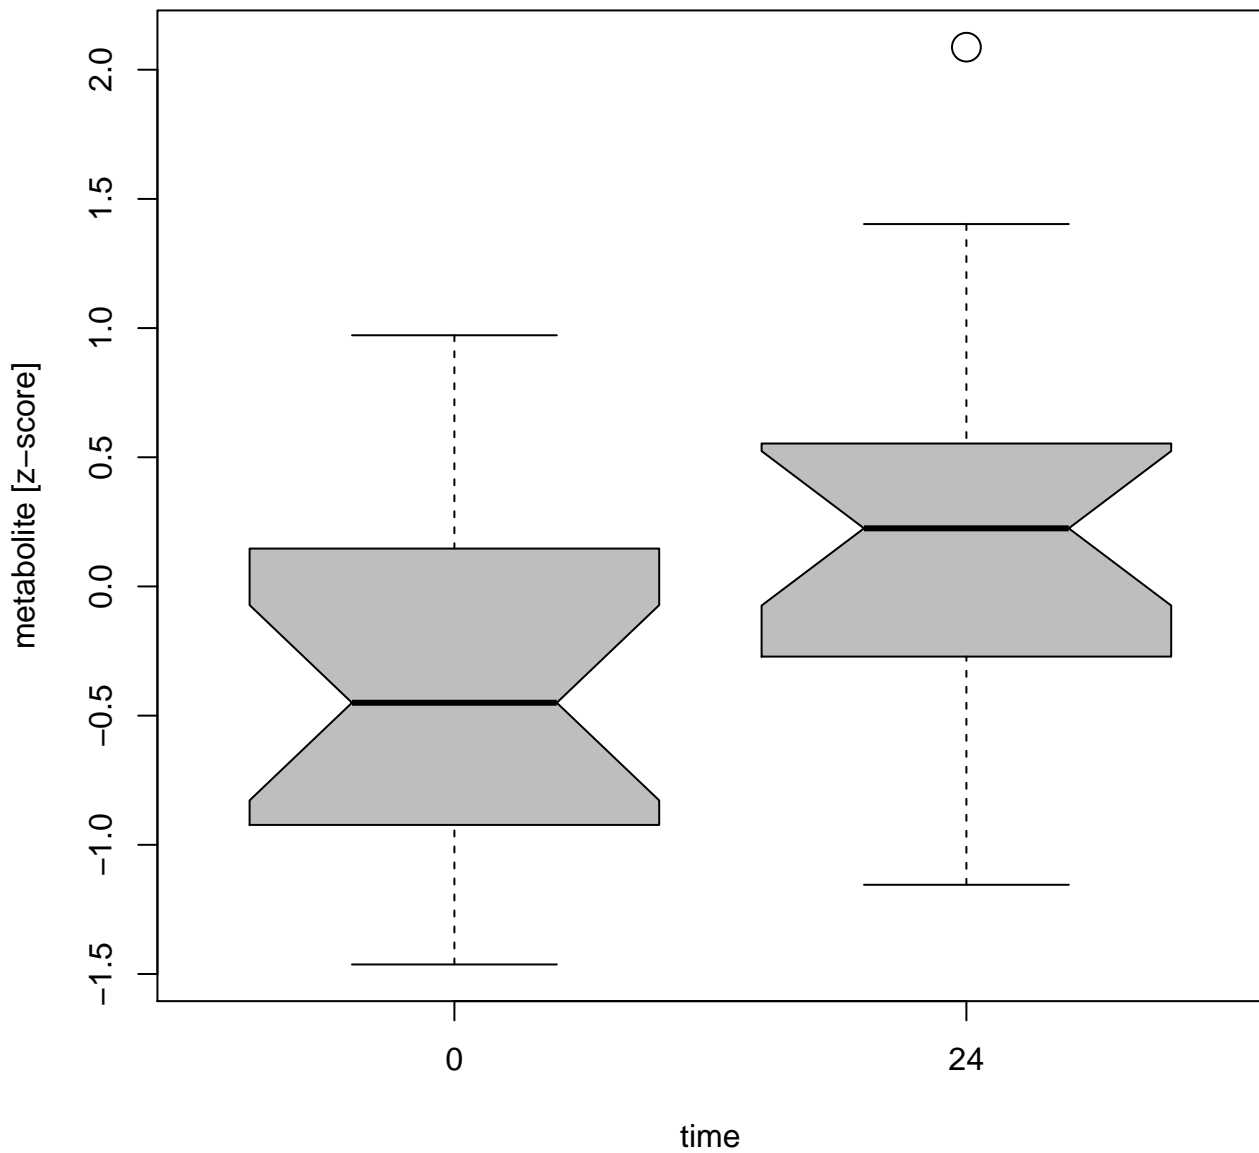

**1-oleoylglycerophosphoethanolamine**

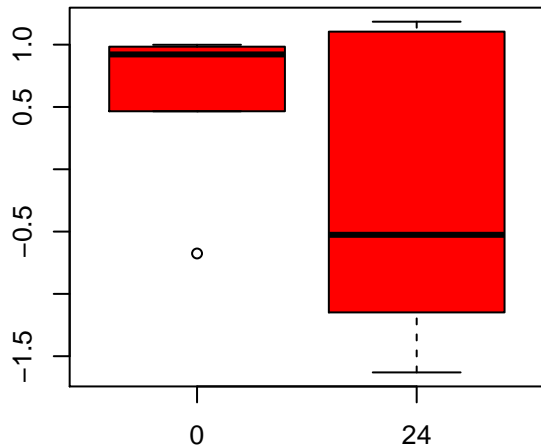

HCT116

**1-oleoylglycerophosphoethanolamine**

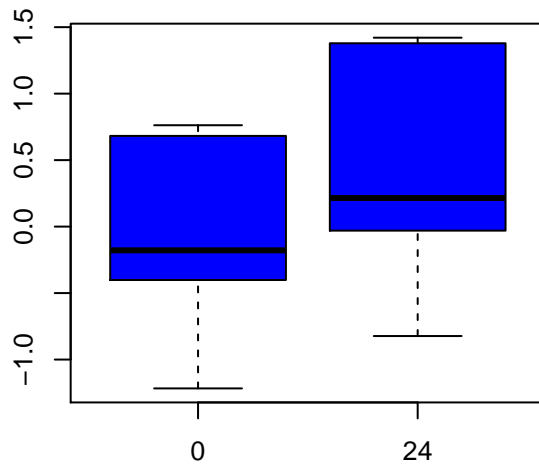

OVCAR

**1-oleoylglycerophosphoethanolamine**

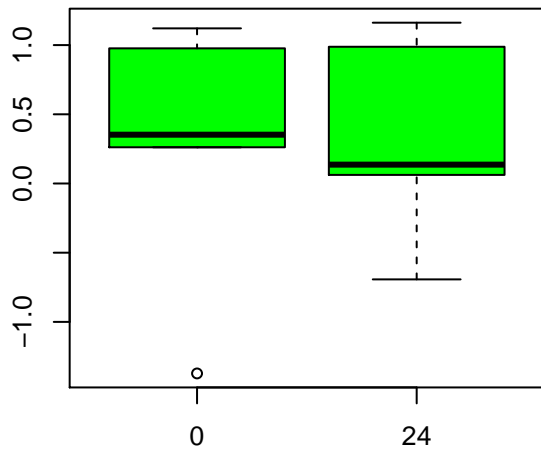

HCT15

**1-oleoylglycerophosphoethanolamine**

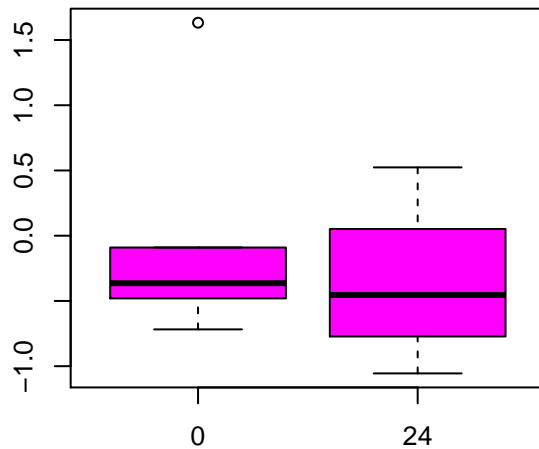

SKOV3

# 1-oleoylglycerophosphoethanolamine

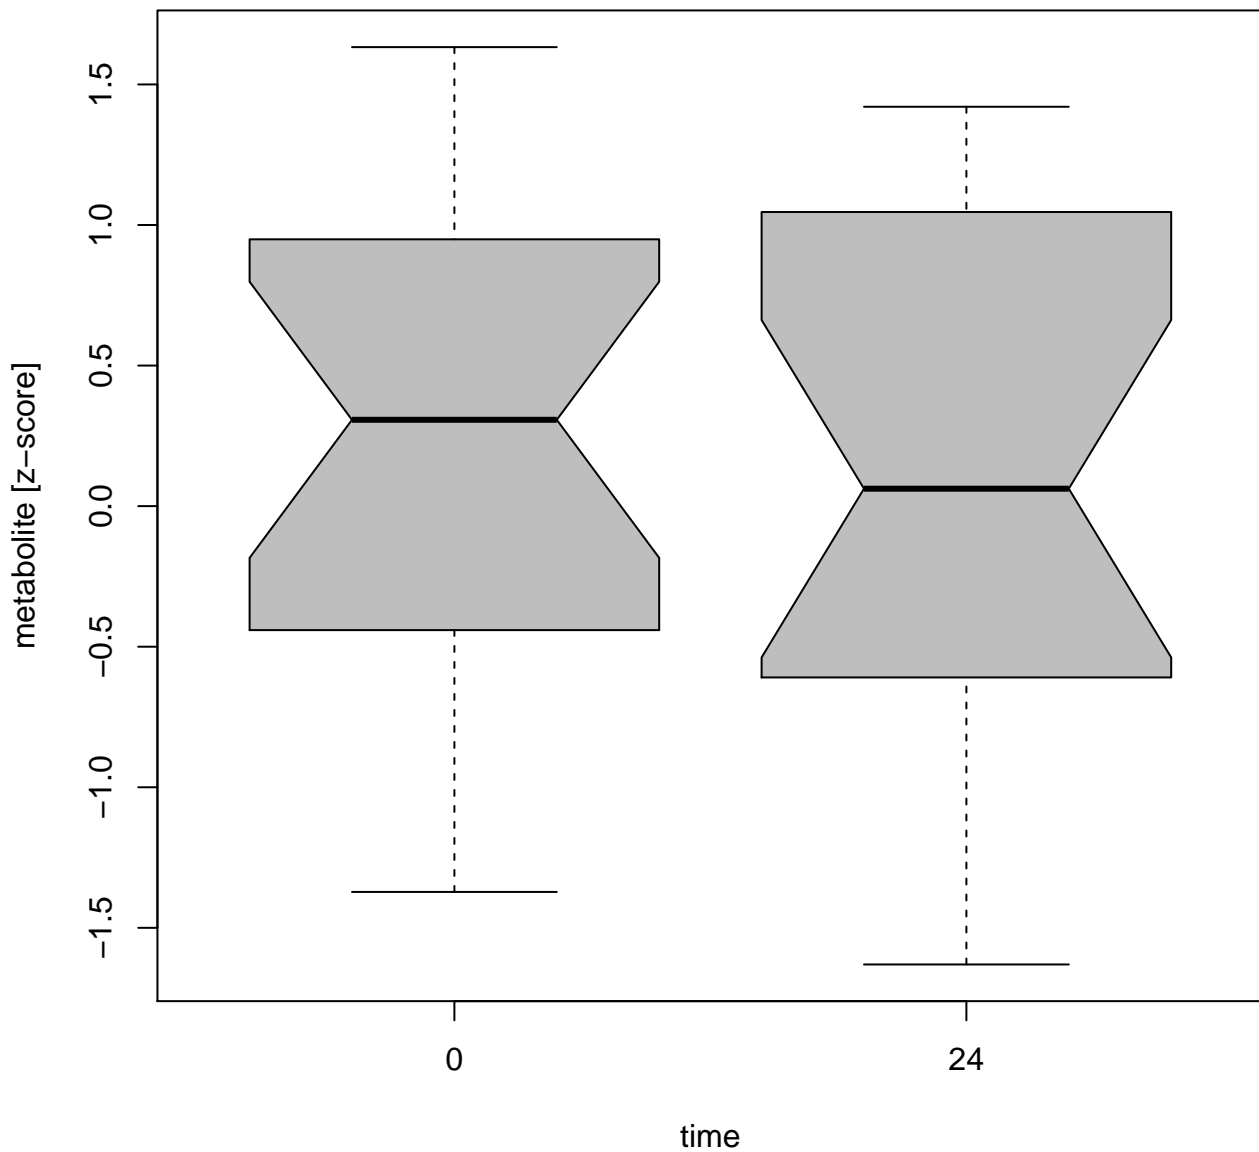

1-palmitoylglycerophosphoethanolamine

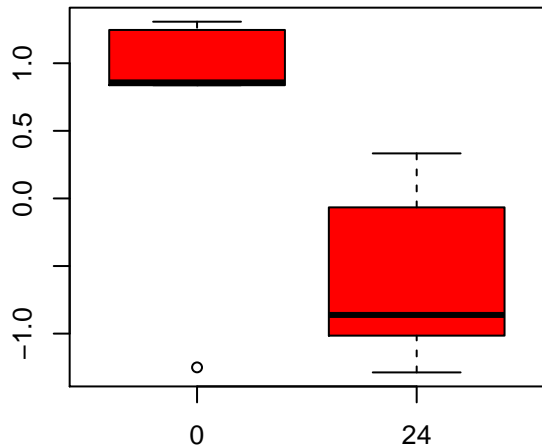

HCT116

1-palmitoylglycerophosphoethanolamine

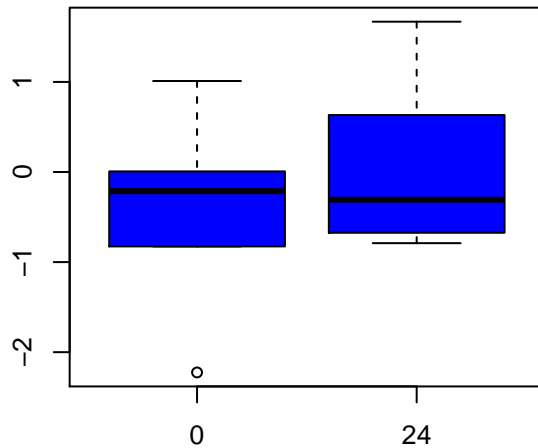

OVCAR

1-palmitoylglycerophosphoethanolamine

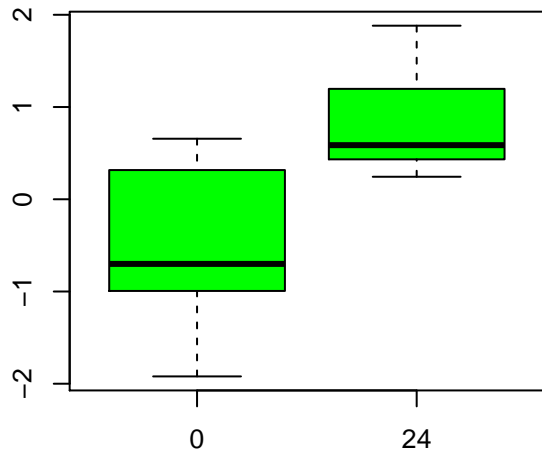

HCT15

1-palmitoylglycerophosphoethanolamine

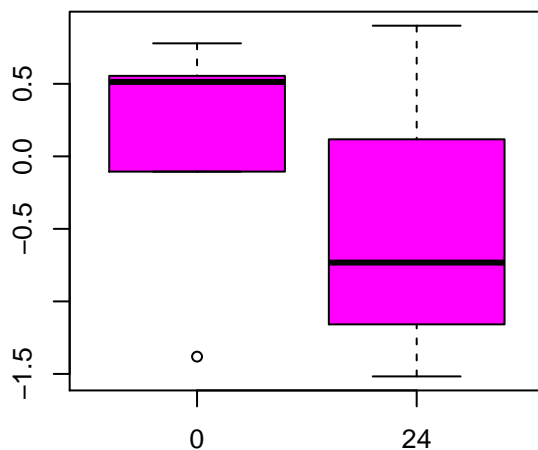

SKOV3



# 1-palmitoylglycerophosphoethanolamine

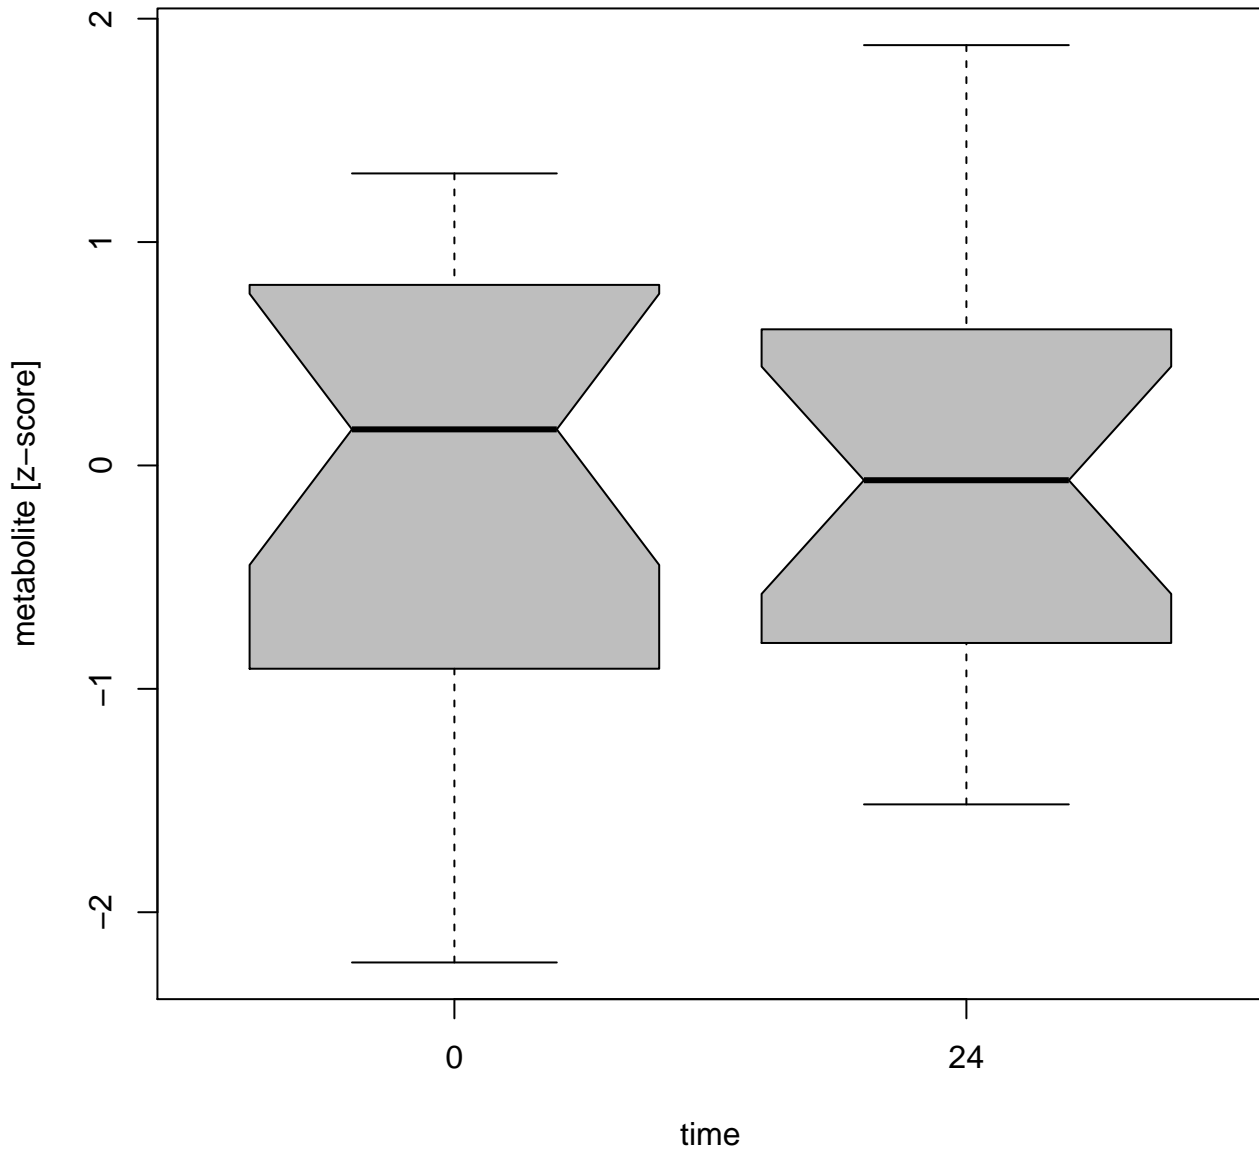

**1-palmitoylplasmenylethanolamine\***

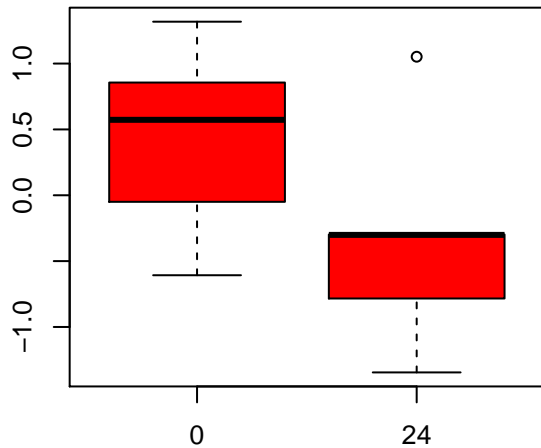

HCT116

**1-palmitoylplasmenylethanolamine\***

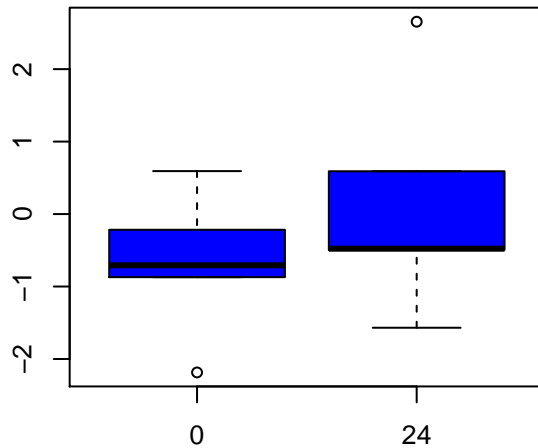

OVCAR

**1-palmitoylplasmenylethanolamine\***

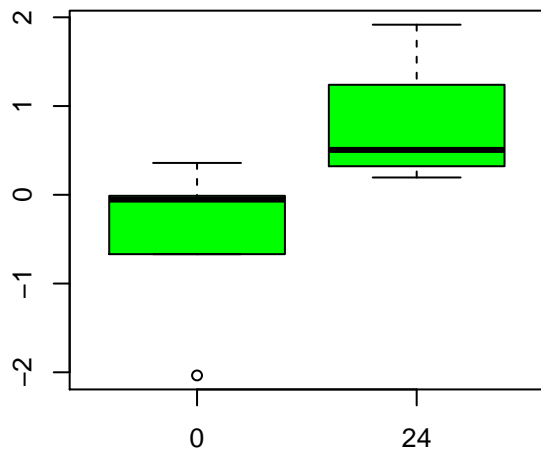

HCT15

**1-palmitoylplasmenylethanolamine\***

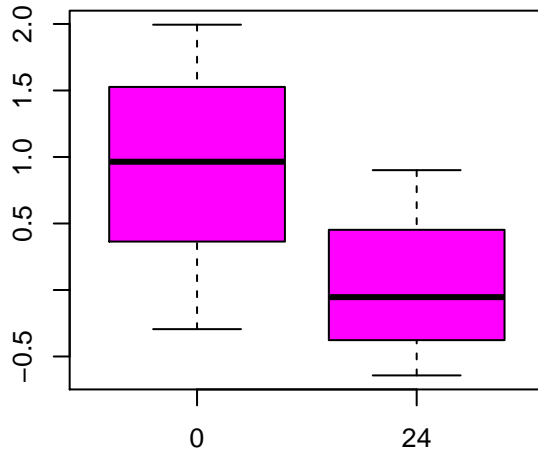

SKOV3

# 1-palmitoylplasmenylethanolamine\*

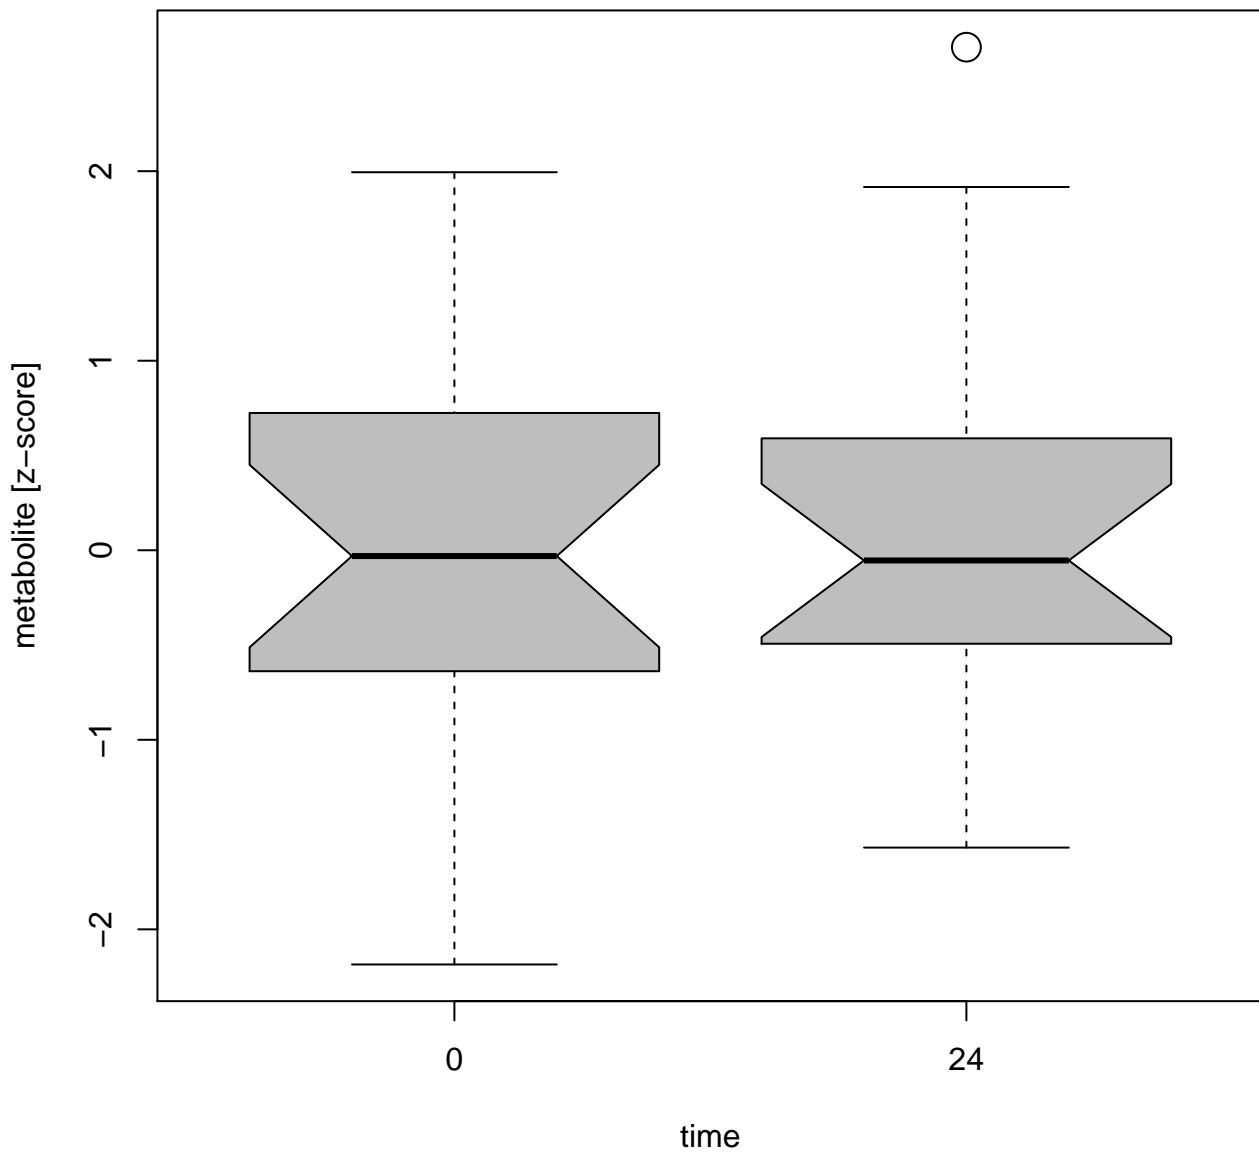

1-stearoylglycerophosphoethanolamine

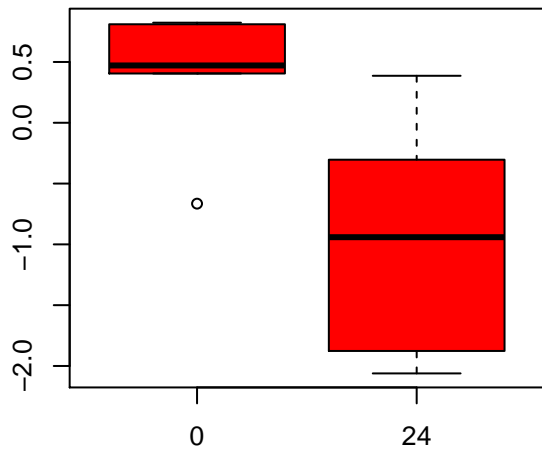

HCT116

1-stearoylglycerophosphoethanolamine

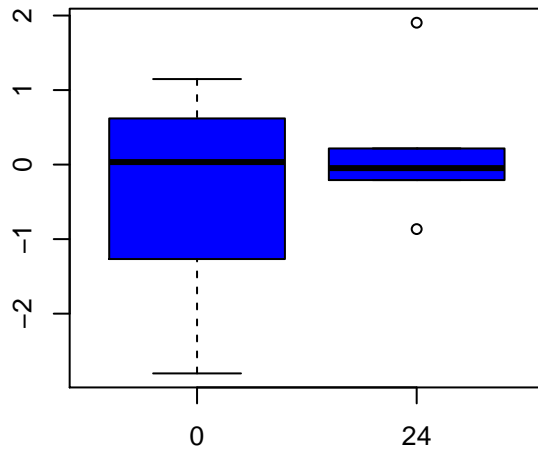

OVCAR

1-stearoylglycerophosphoethanolamine

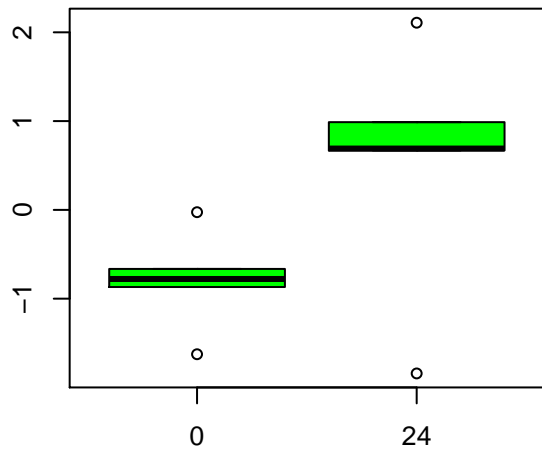

HCT15

1-stearoylglycerophosphoethanolamine

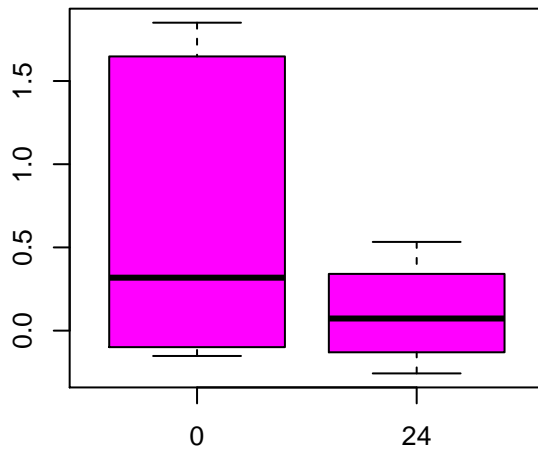

SKOV3

# 1-stearoylglycerophosphoethanolamine

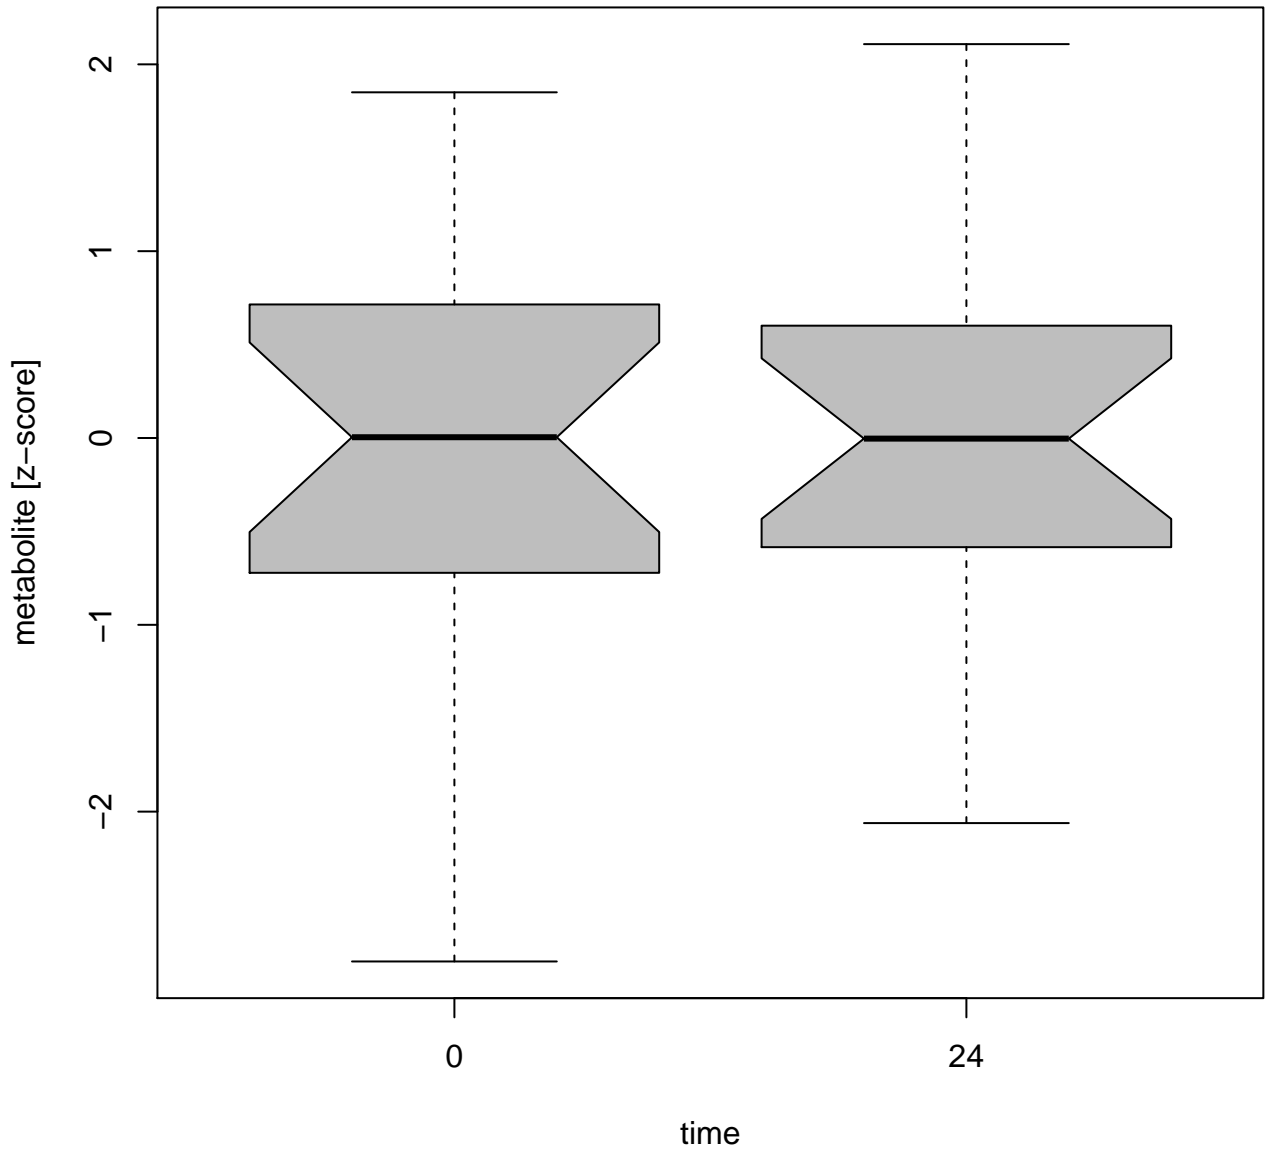

**10-heptadecenoate (17:1n7)**

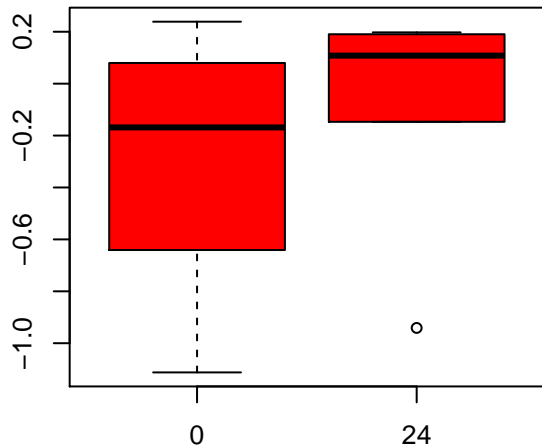

HCT116

**10-heptadecenoate (17:1n7)**

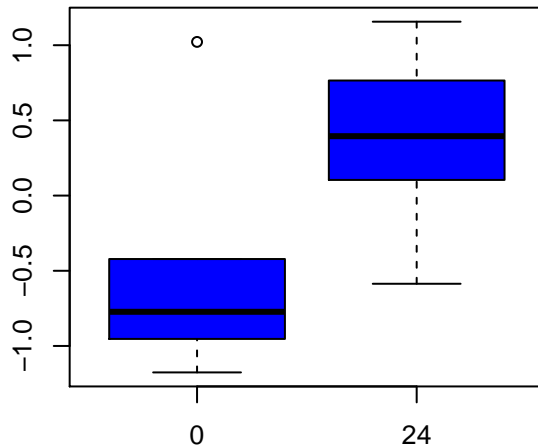

OVCAR

**10-heptadecenoate (17:1n7)**

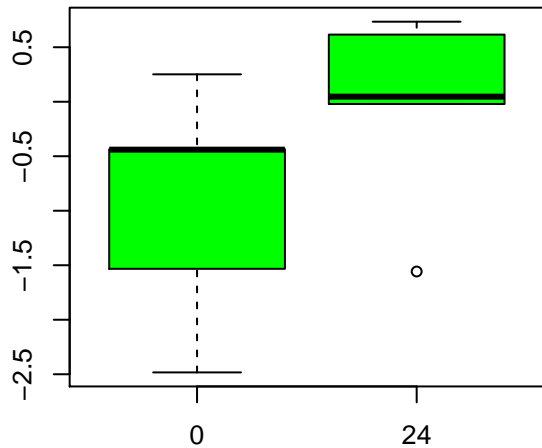

HCT15

**10-heptadecenoate (17:1n7)**

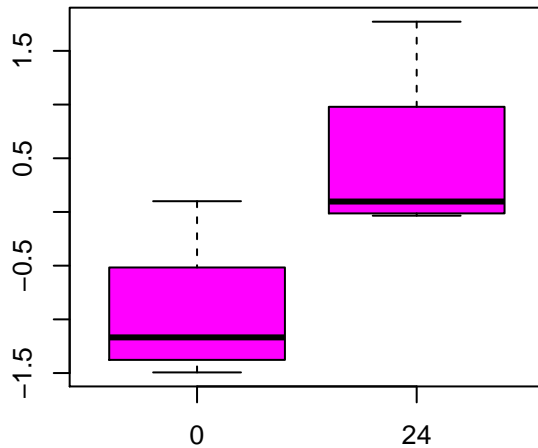

SKOV3

# 10-heptadecenoate (17:1n7)

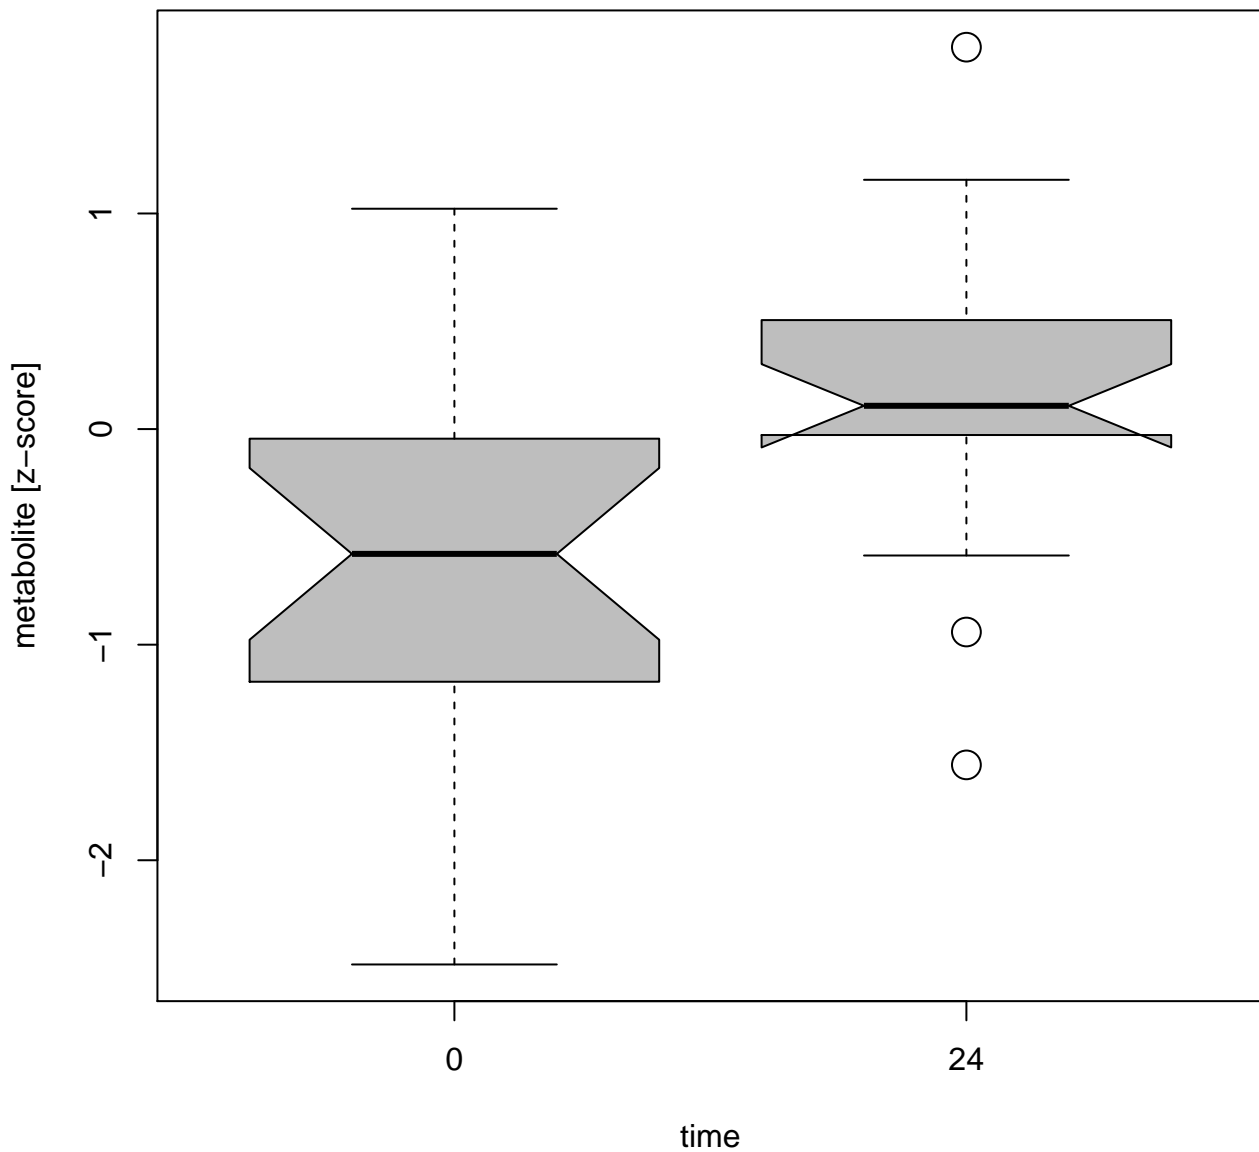

**10-nonadecenoate (19:1n9)**

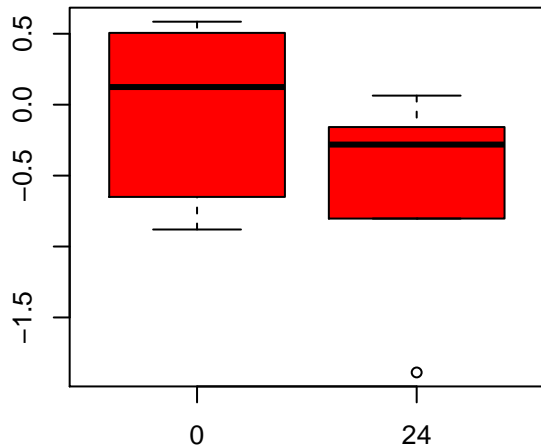

HCT116

**10-nonadecenoate (19:1n9)**

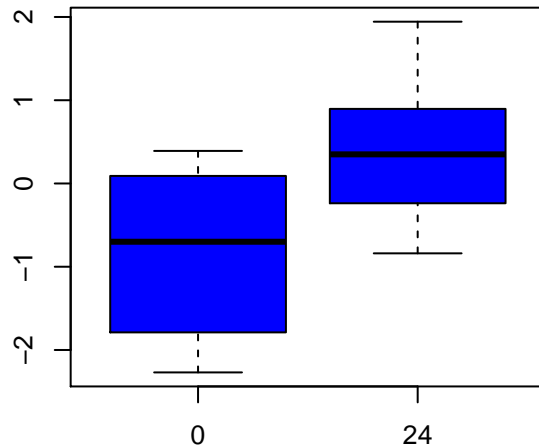

OVCAR

**10-nonadecenoate (19:1n9)**

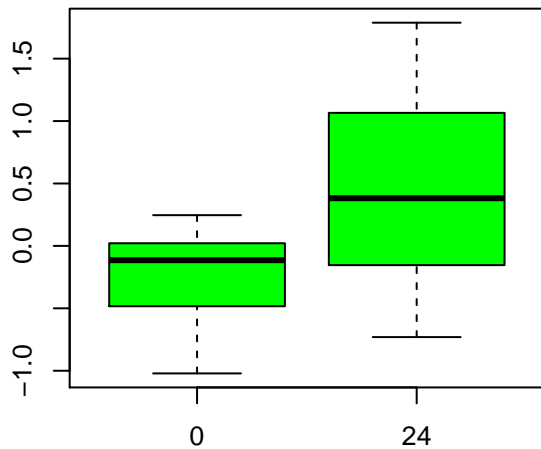

HCT15

**10-nonadecenoate (19:1n9)**

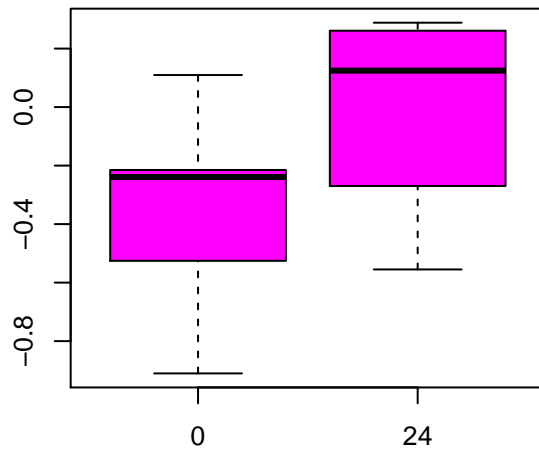

SKOV3



# 10-nonadecenoate (19:1n9)

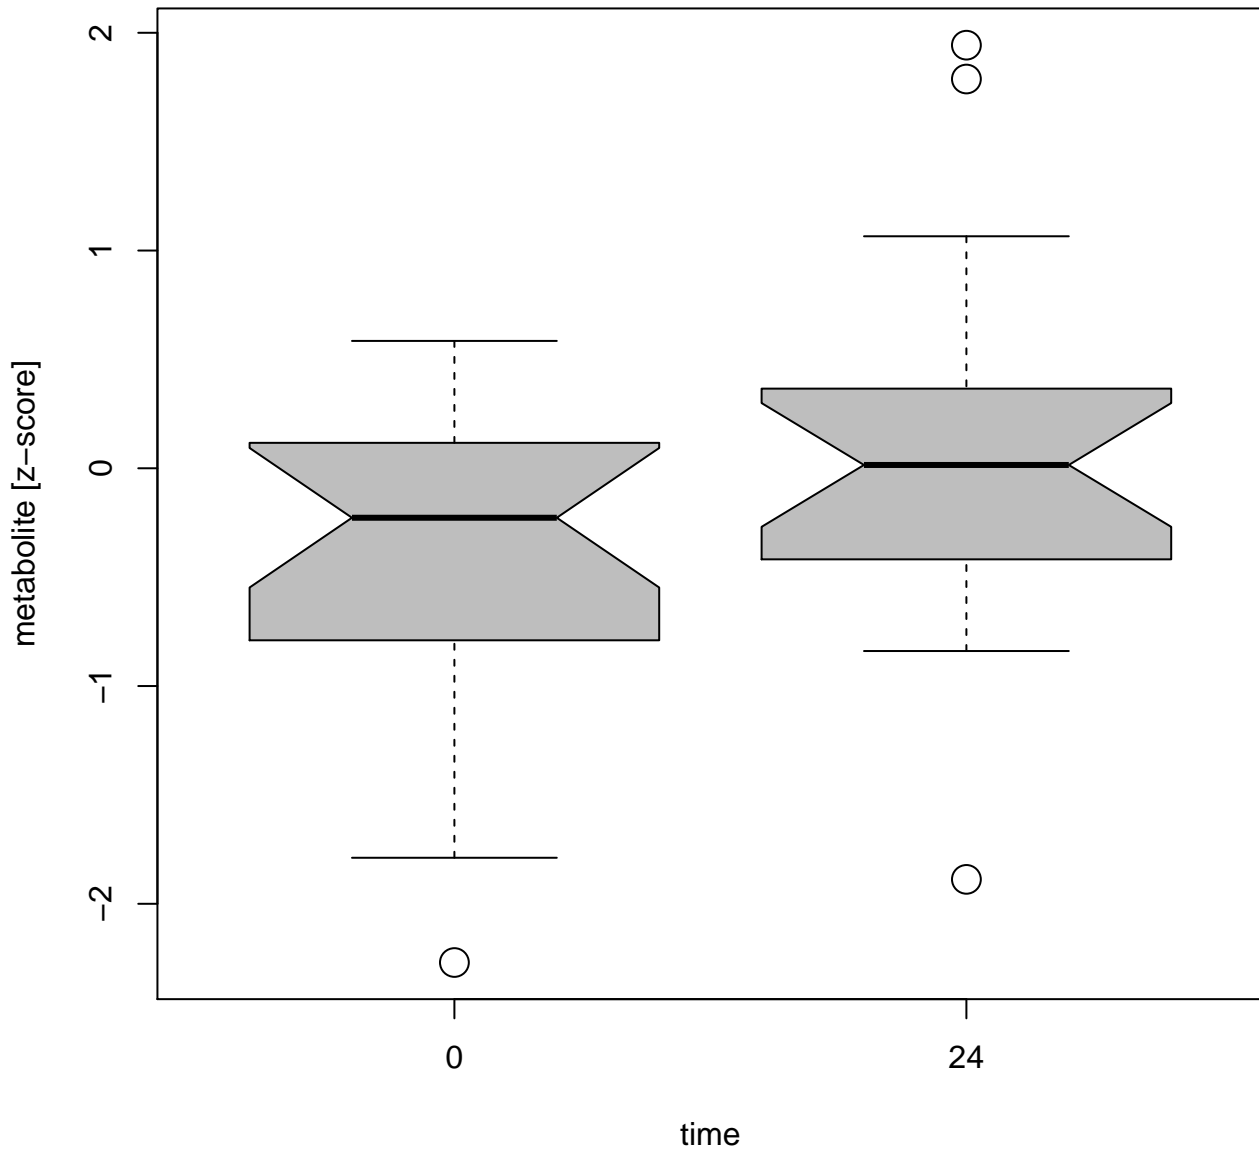

**2-aminoadipate**

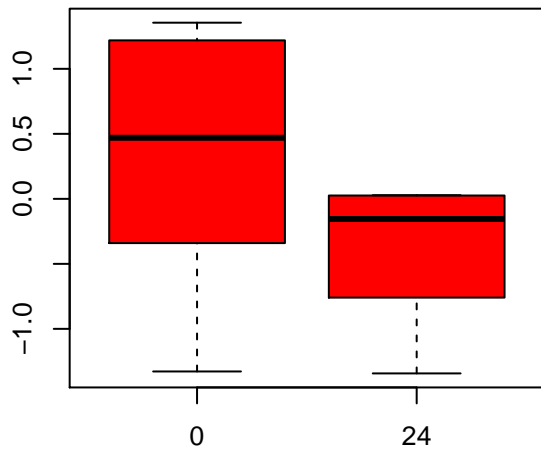

HCT116

**2-aminoadipate**

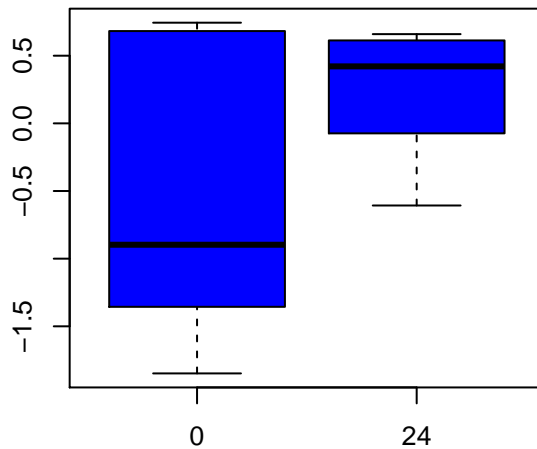

OVCAR

**2-aminoadipate**

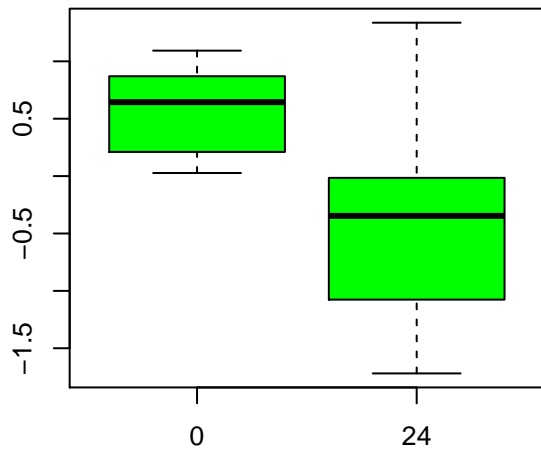

HCT15

**2-aminoadipate**

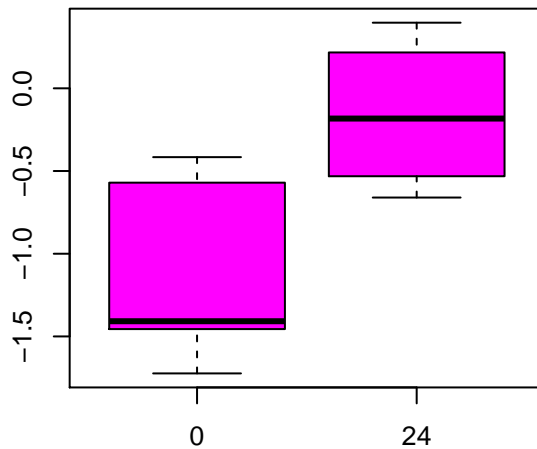

SKOV3

# 2-aminoadipate

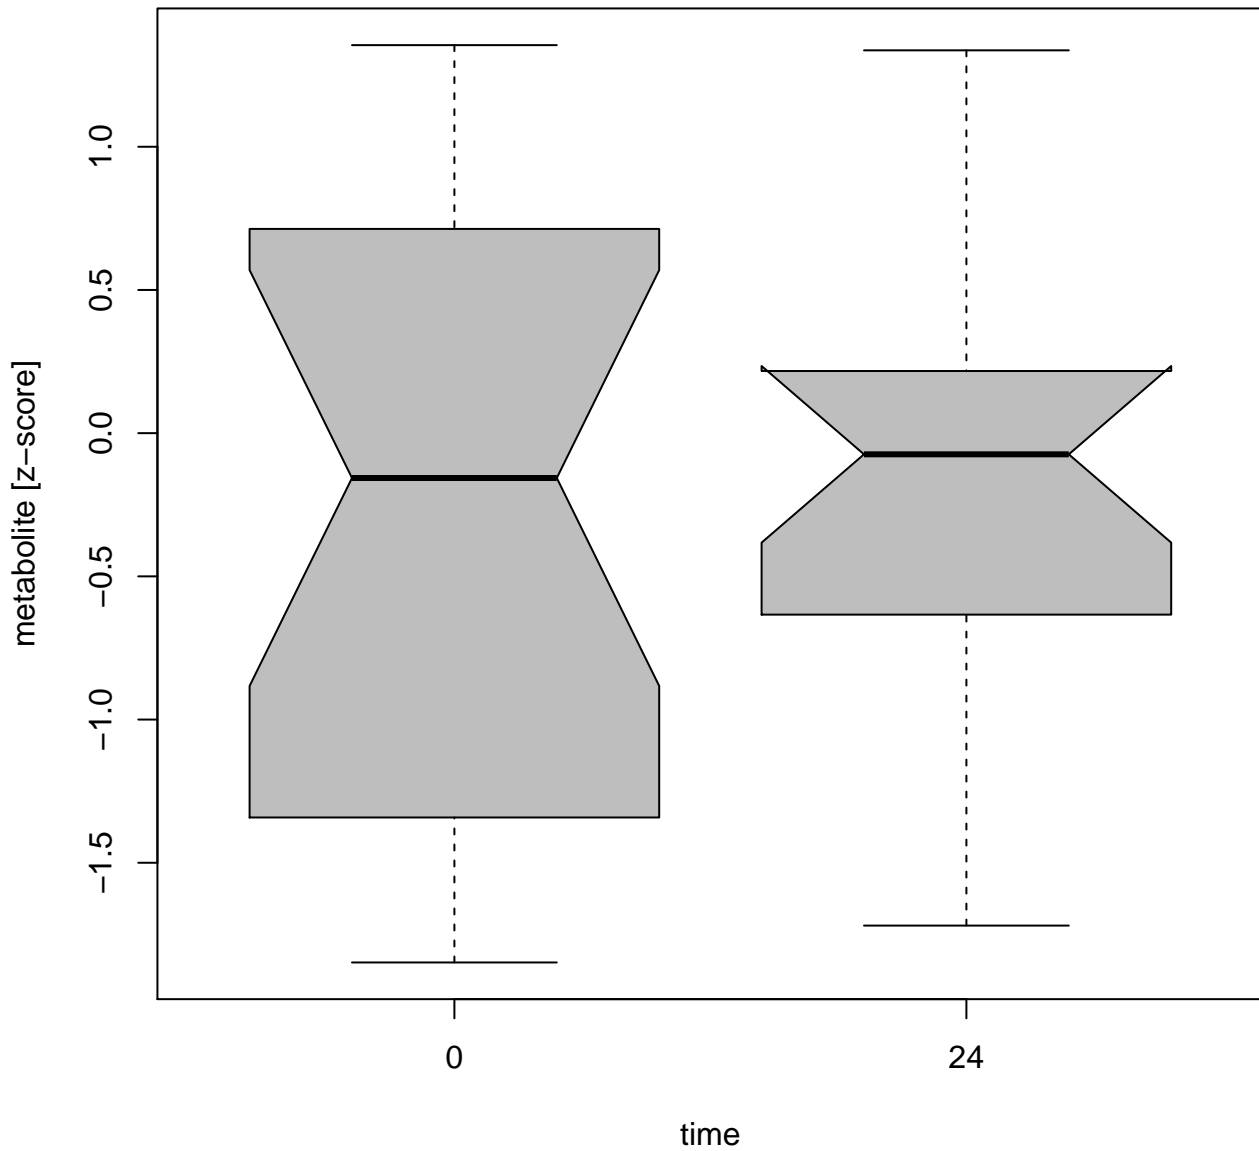

2-arachidonoylglycerophosphoethanolami 2-arachidonoylglycerophosphoethanolami

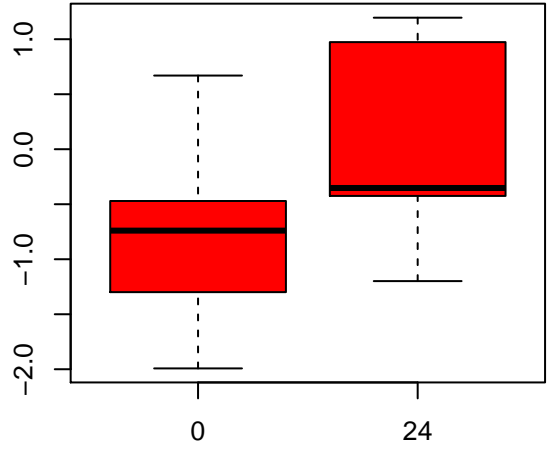

HCT116

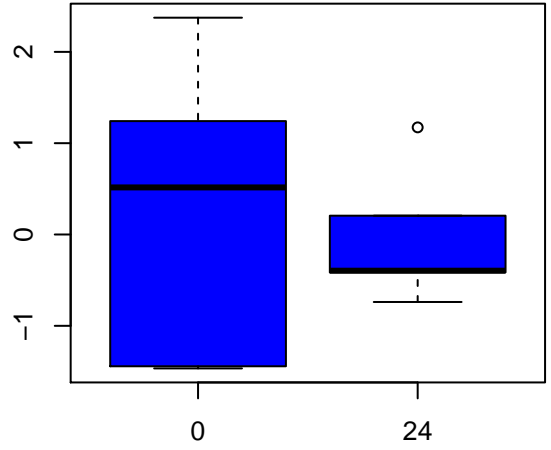

OVCAR

2-arachidonoylglycerophosphoethanolami 2-arachidonoylglycerophosphoethanolami

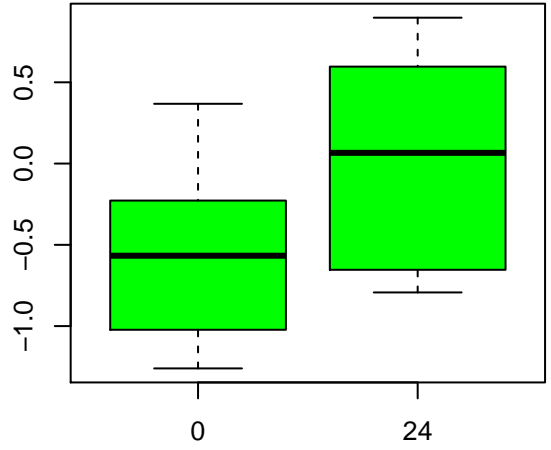

HCT15

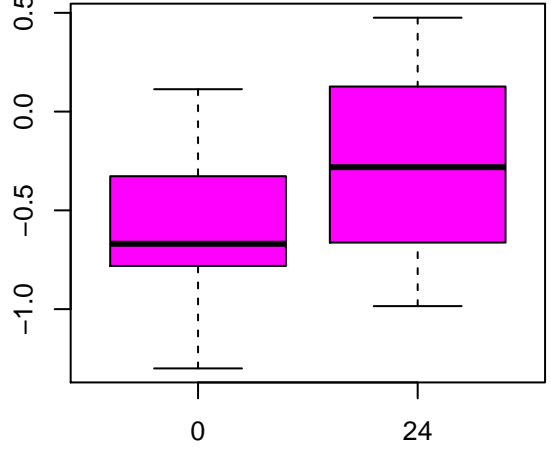

SKOV3

# 2-arachidonoylglycerophosphoethanolamine\*

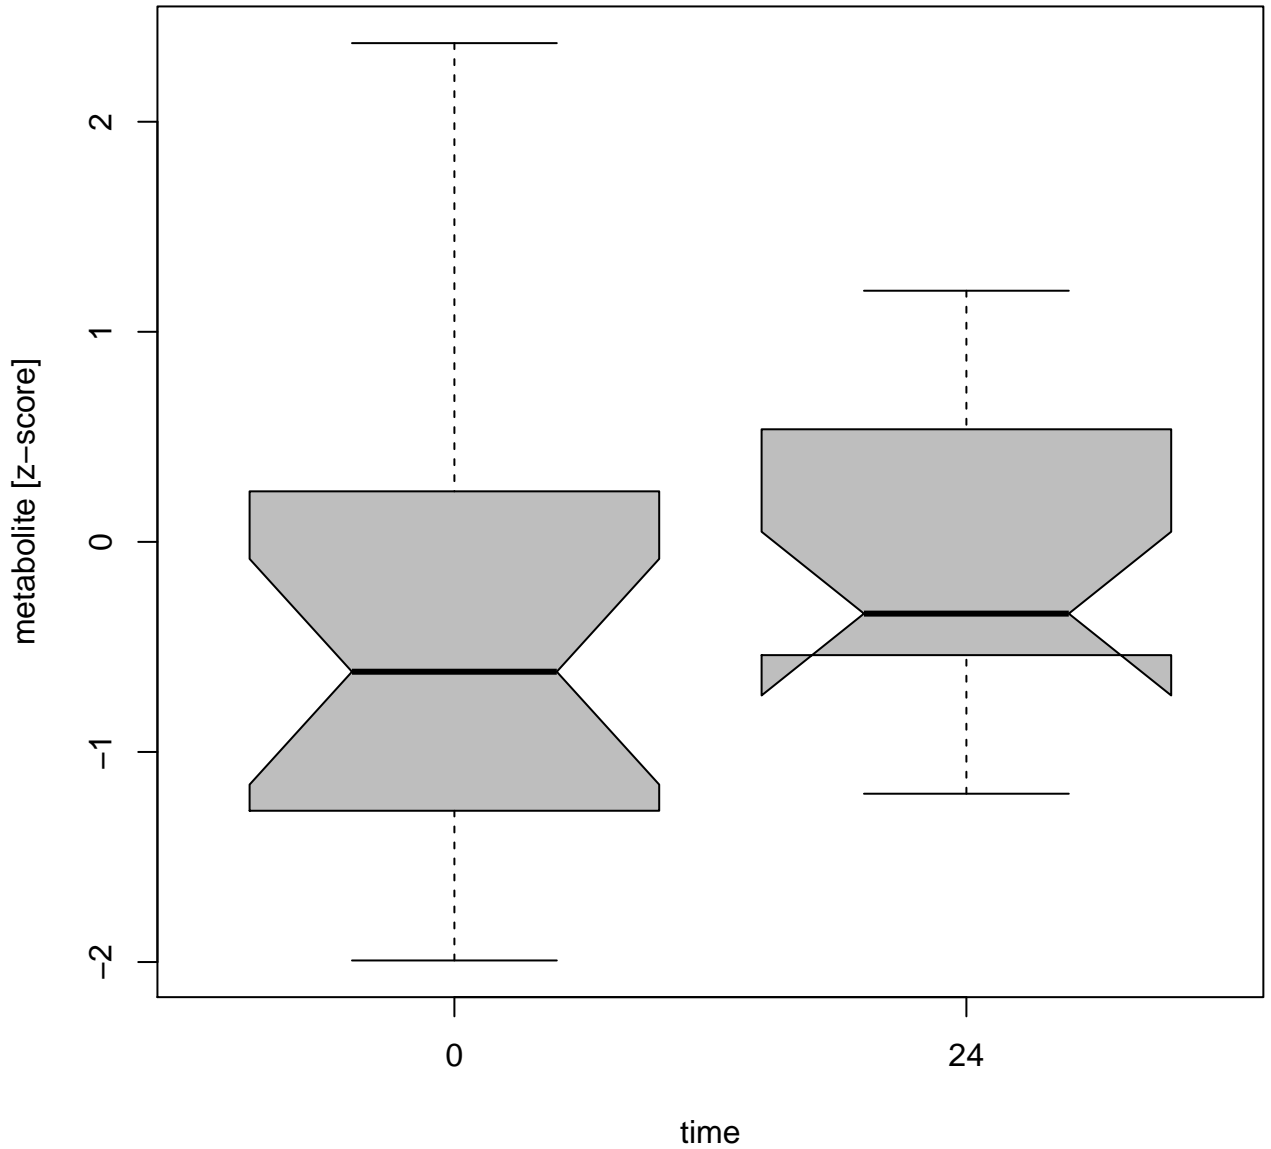

**2-methylbutyrylcarnitine (C5)**

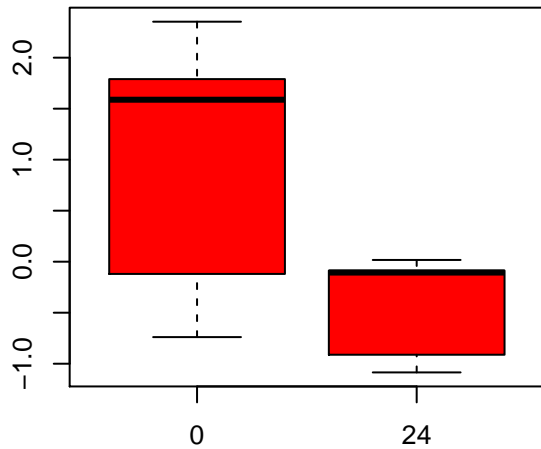

HCT116

**2-methylbutyrylcarnitine (C5)**

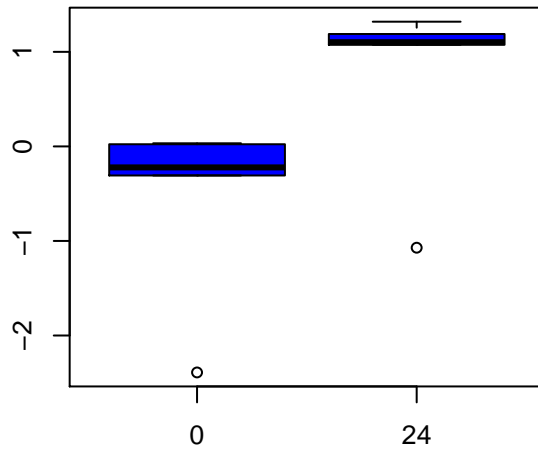

OVCAR

**2-methylbutyrylcarnitine (C5)**

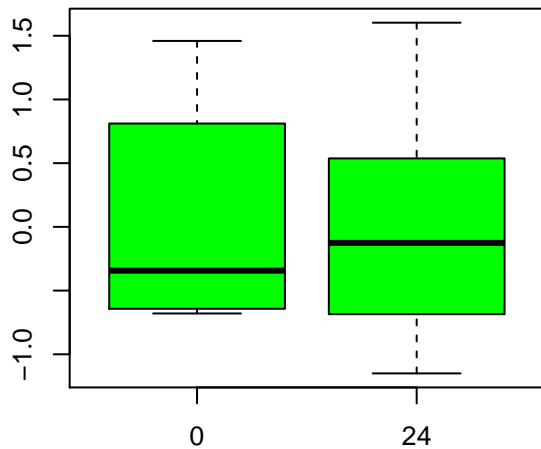

HCT15

**2-methylbutyrylcarnitine (C5)**

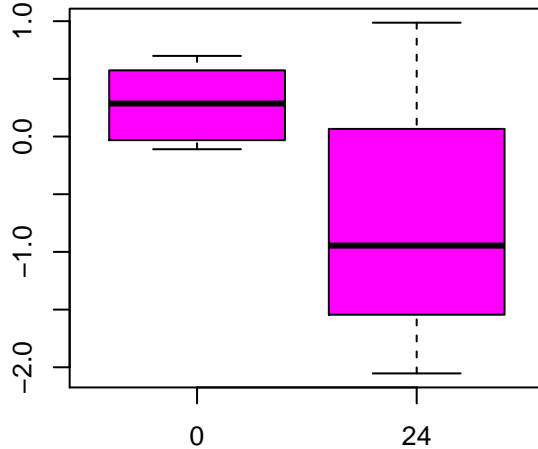

SKOV3

## 2-methylbutyrylcarnitine (C5)

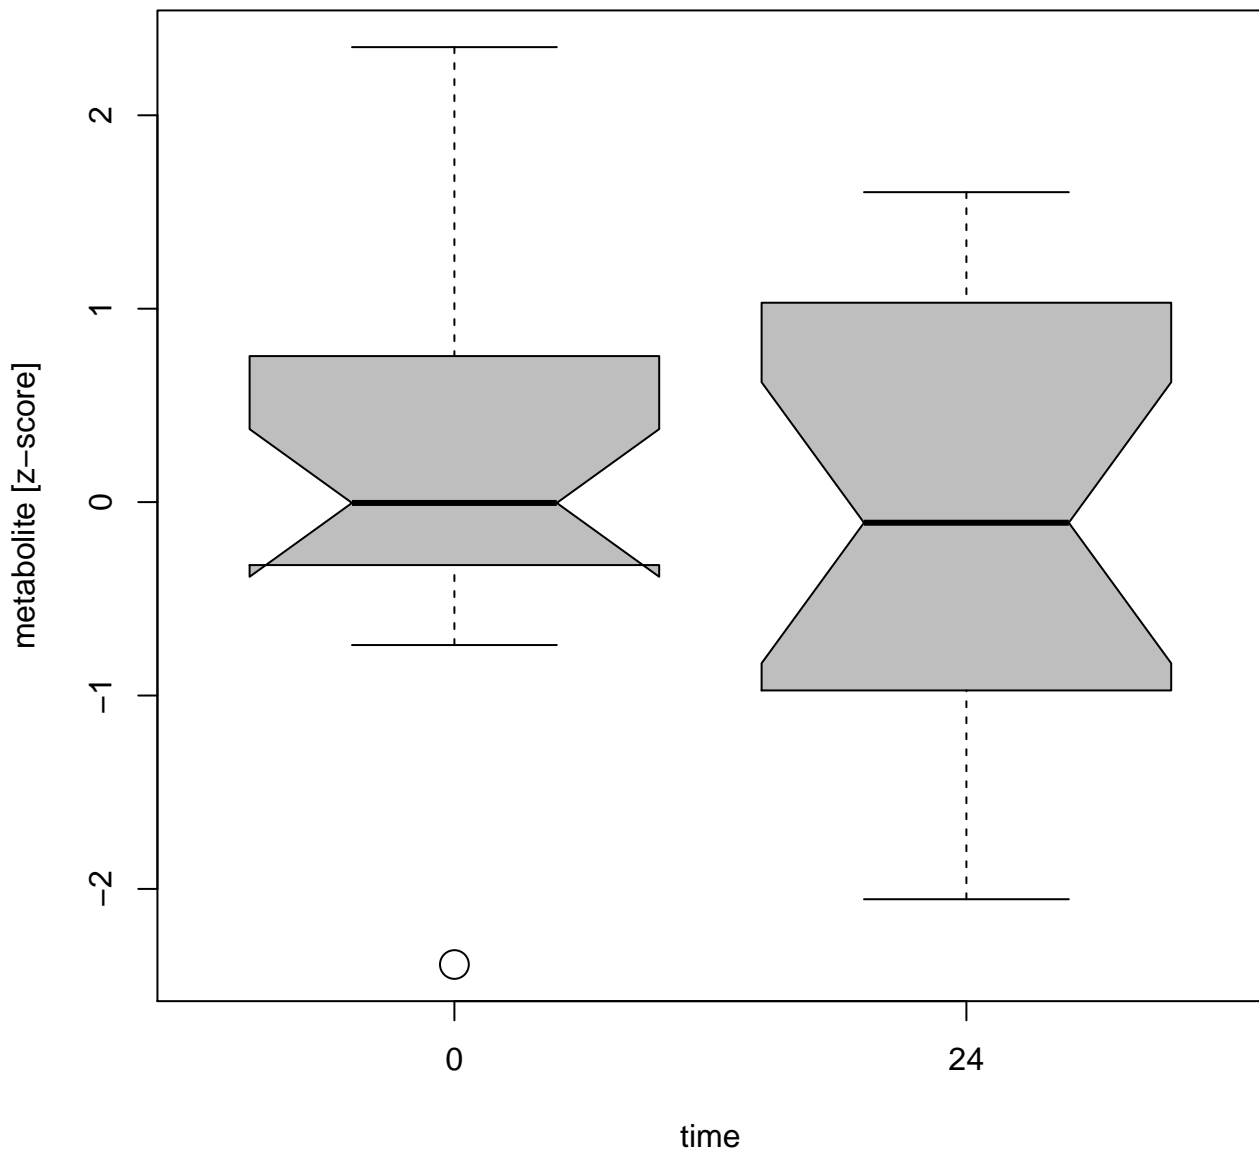

2-oleoylglycerophosphoethanolamine\*

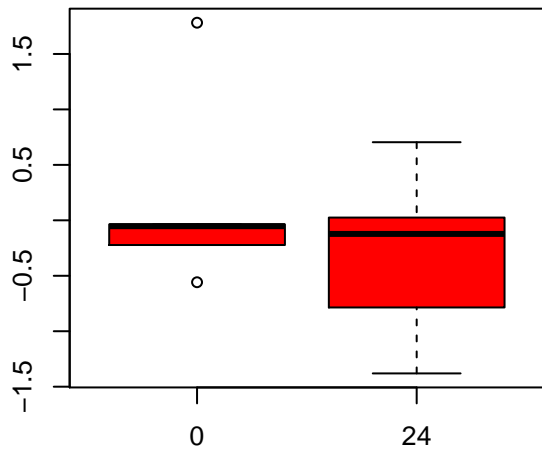

HCT116

2-oleoylglycerophosphoethanolamine\*

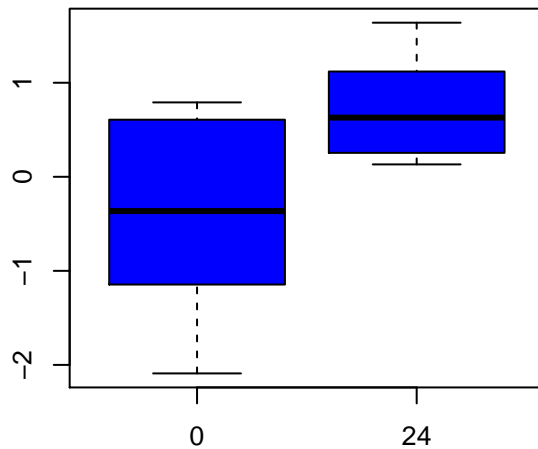

OVCAR

2-oleoylglycerophosphoethanolamine\*

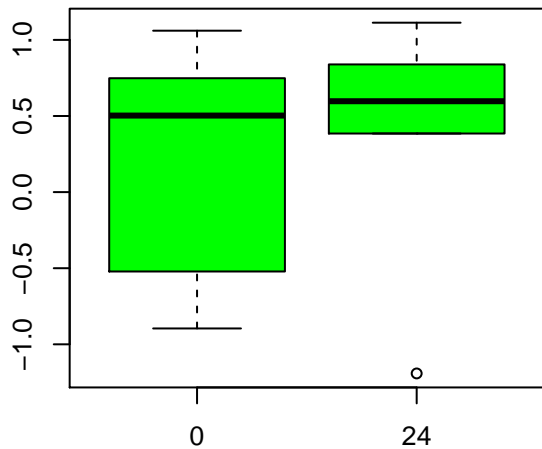

HCT15

2-oleoylglycerophosphoethanolamine\*

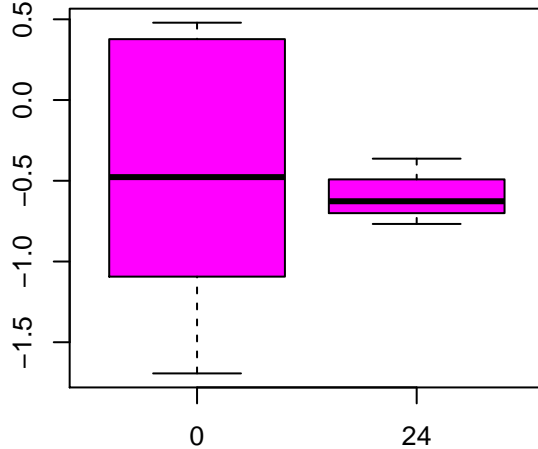

SKOV3



# 2-oleoylglycerophosphoethanolamine\*

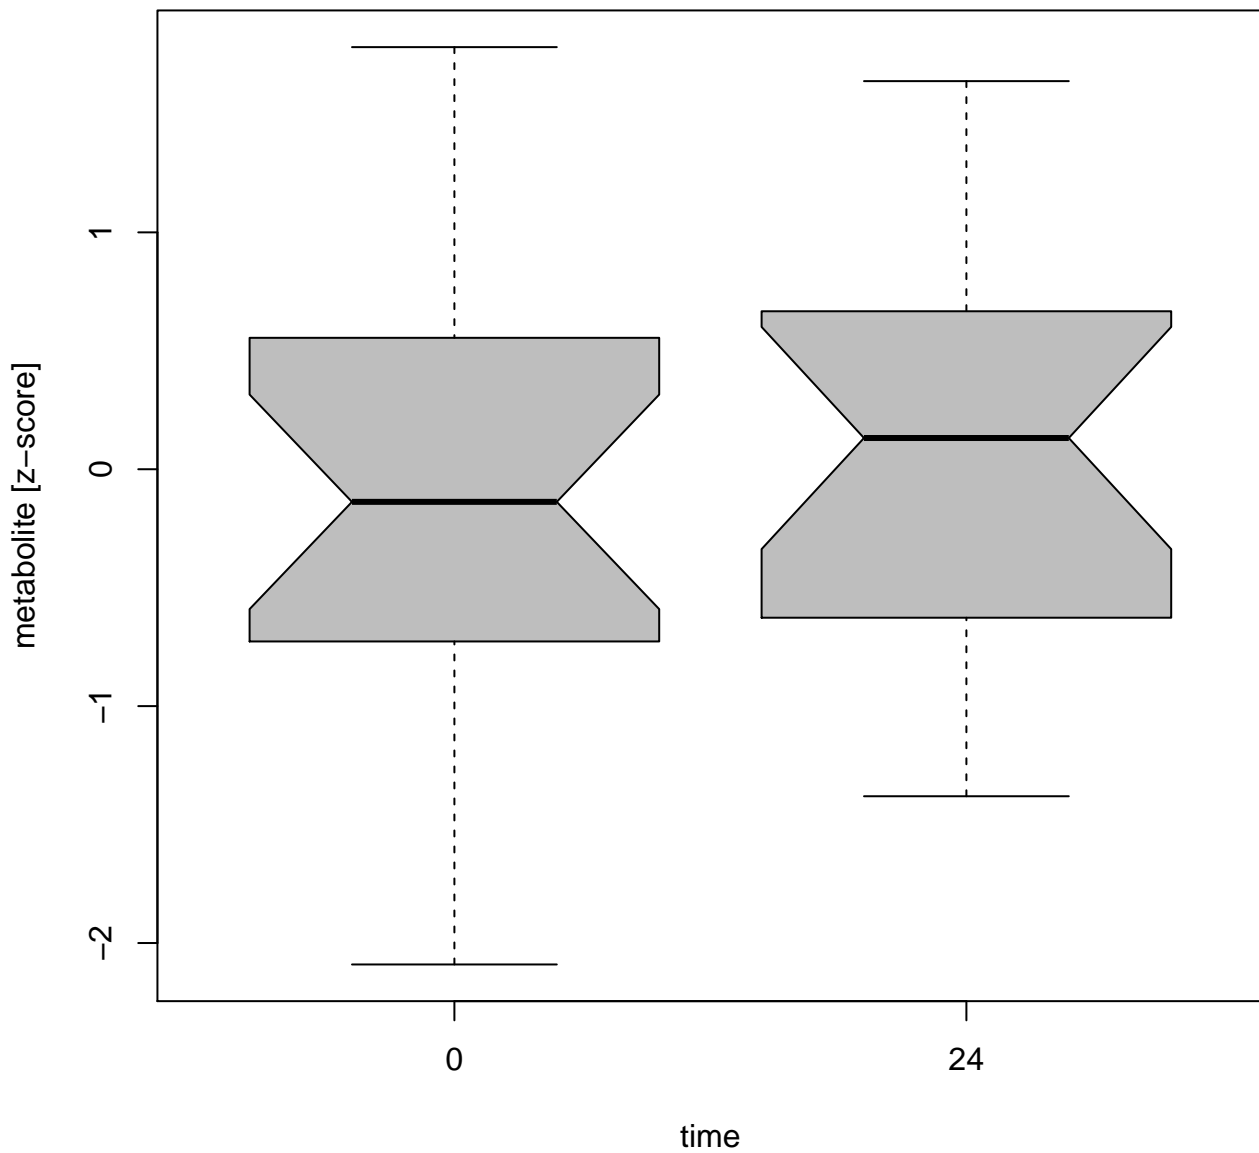

2-palmitoylglycerophosphoethanolamine

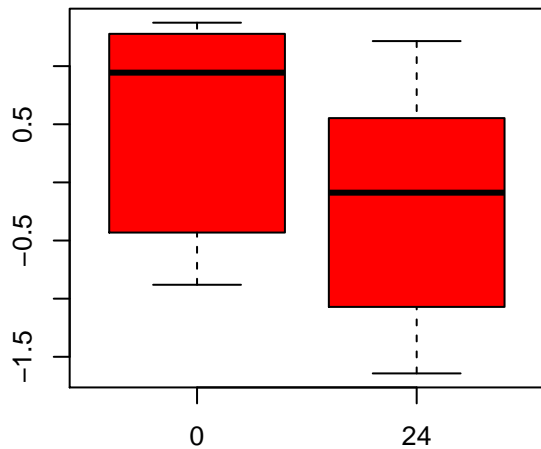

HCT116

2-palmitoylglycerophosphoethanolamine

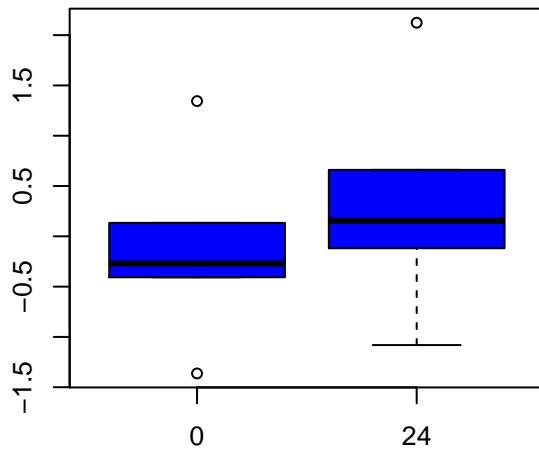

OVCAR

2-palmitoylglycerophosphoethanolamine

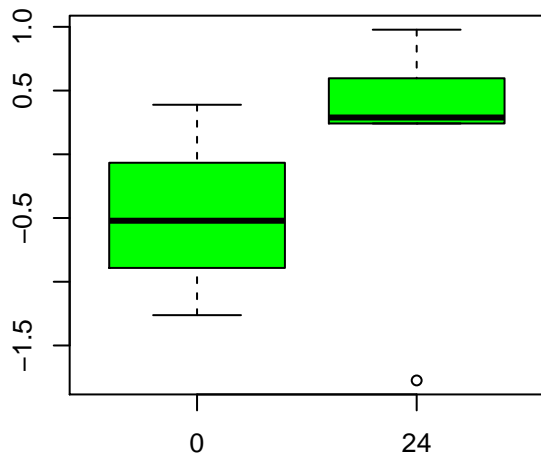

HCT15

2-palmitoylglycerophosphoethanolamine

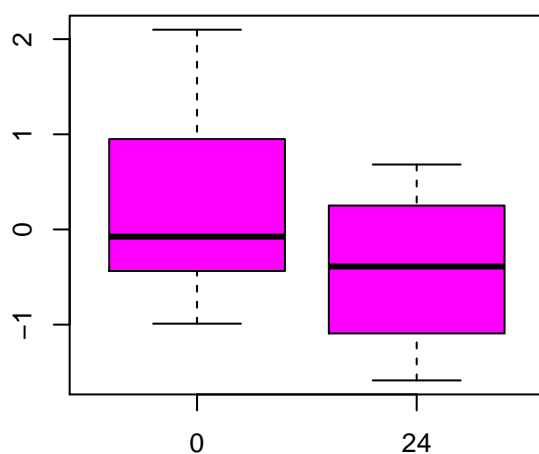

SKOV3

## 2-palmitoylglycerophosphoethanolamine\*

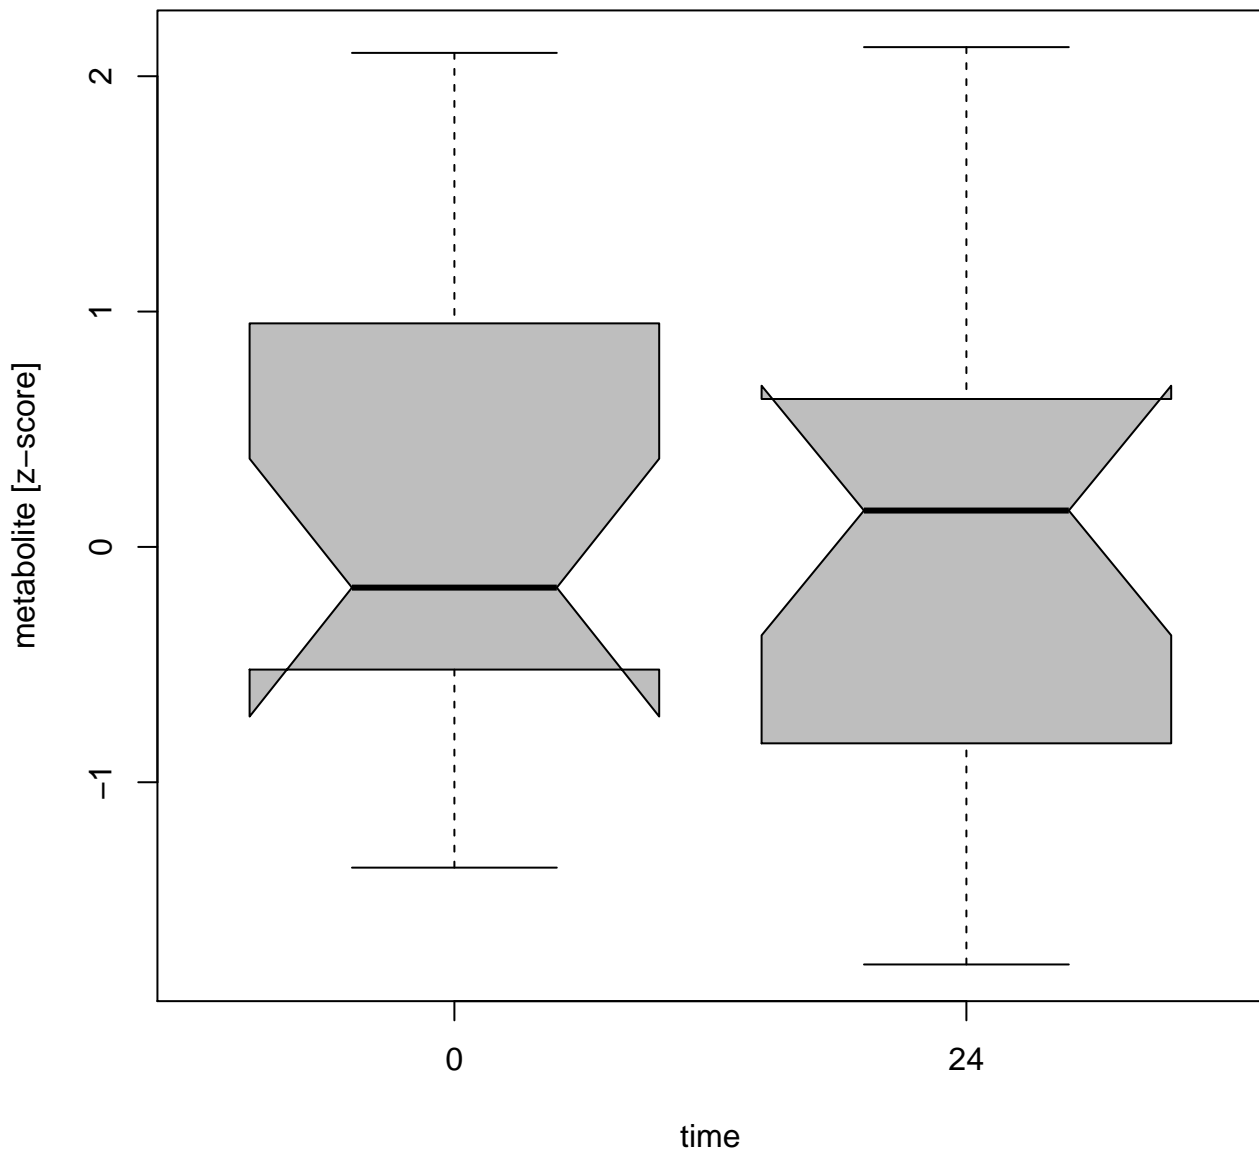

**2-phenoxyethanol**

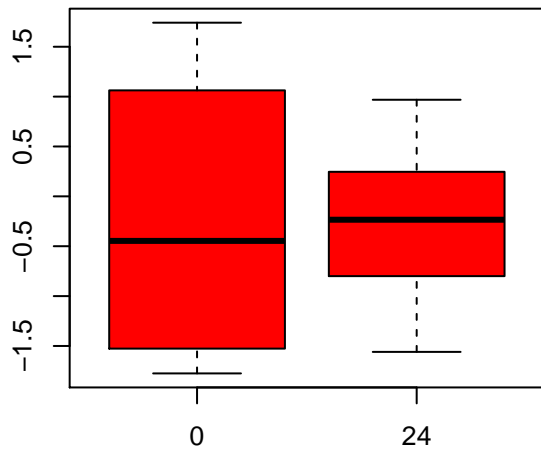

HCT116

**2-phenoxyethanol**

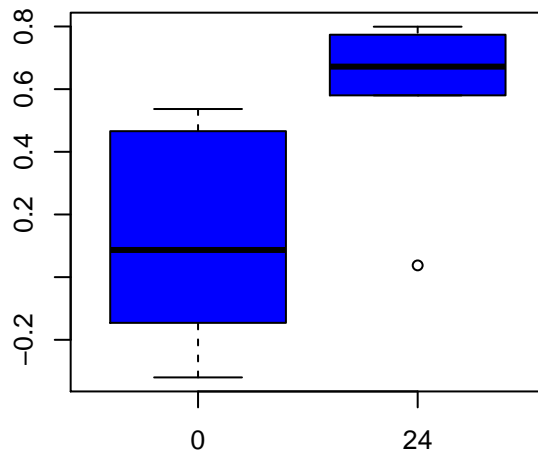

OVCAR

**2-phenoxyethanol**

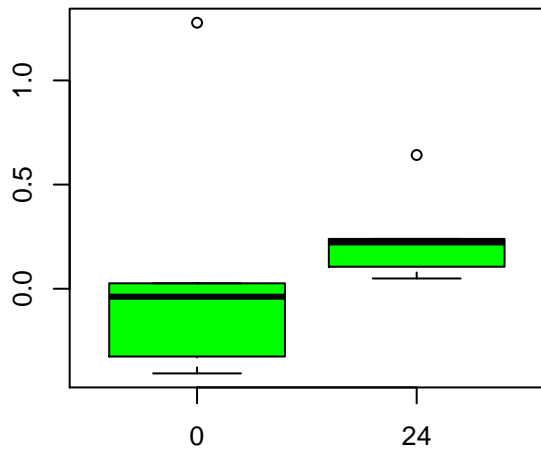

HCT15

**2-phenoxyethanol**

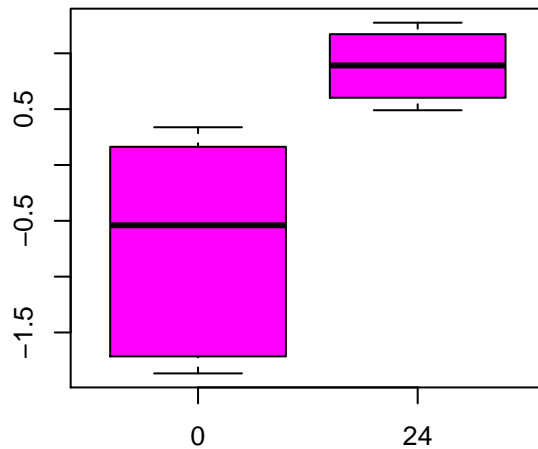

SKOV3

## 2-phenoxyethanol

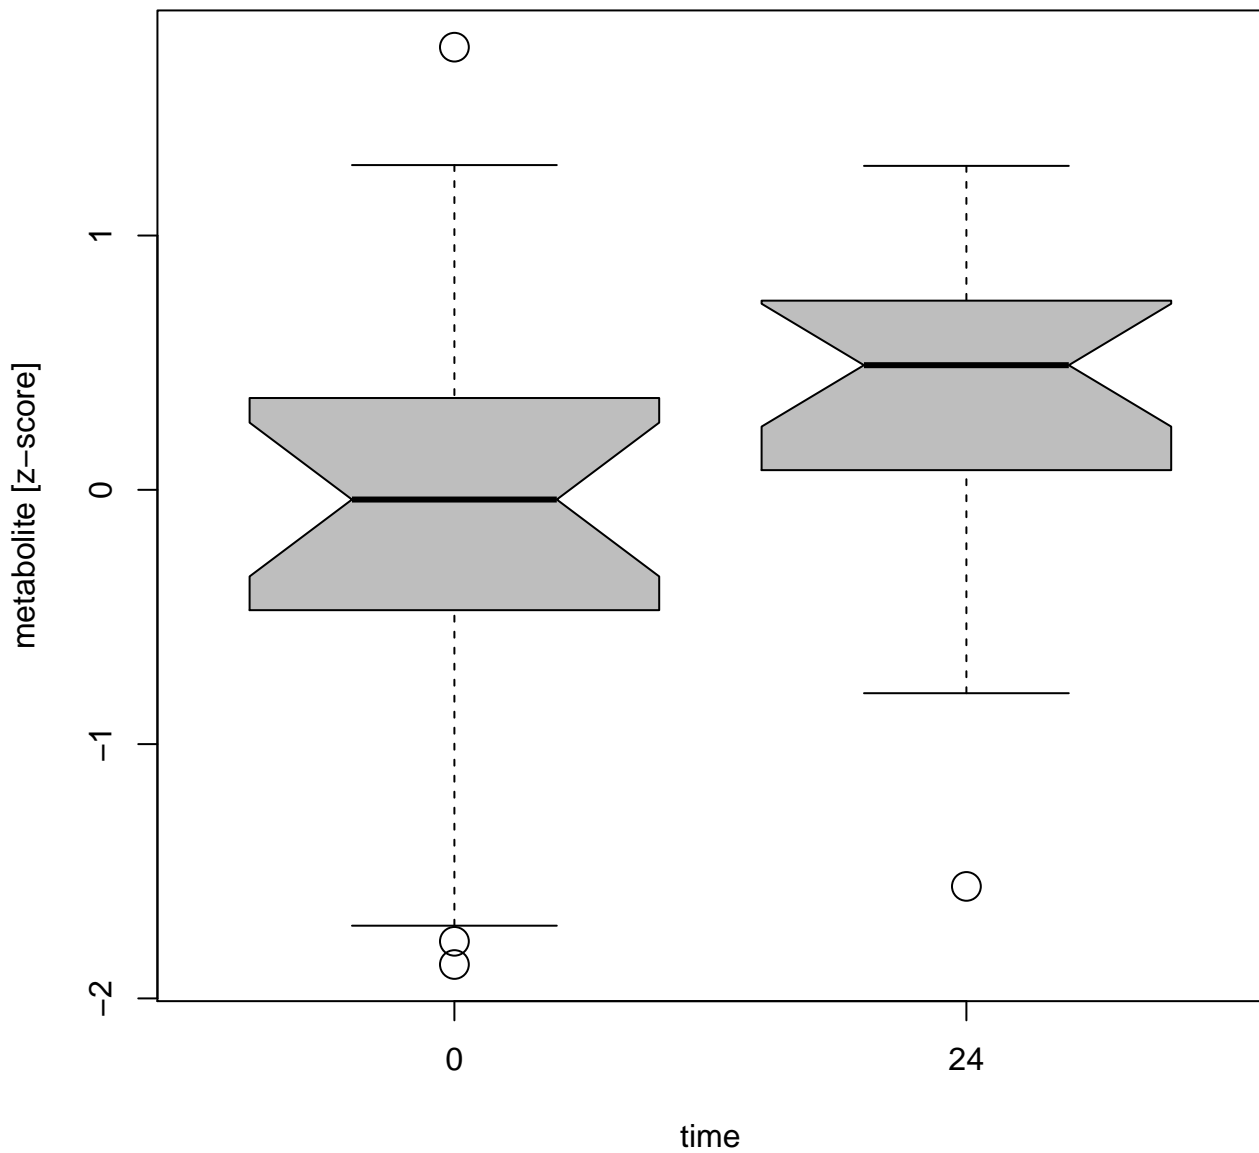

**3-phosphoglycerate**

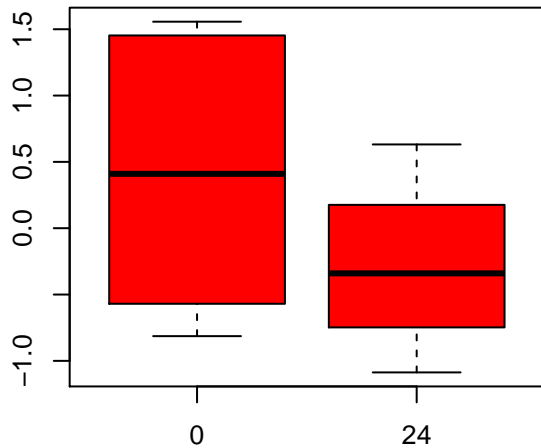

HCT116

**3-phosphoglycerate**

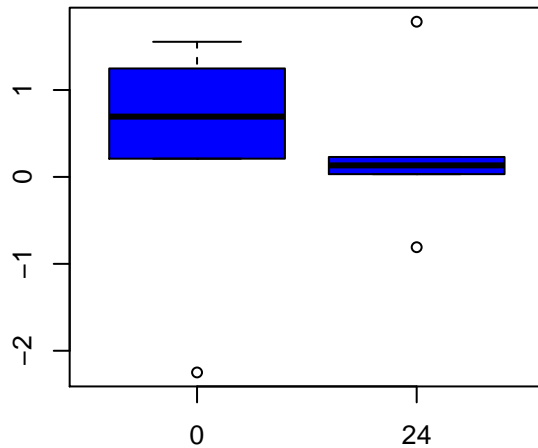

OVCAR

**3-phosphoglycerate**

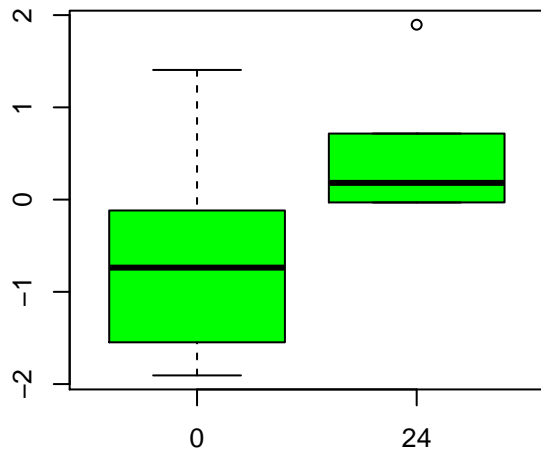

HCT15

**3-phosphoglycerate**

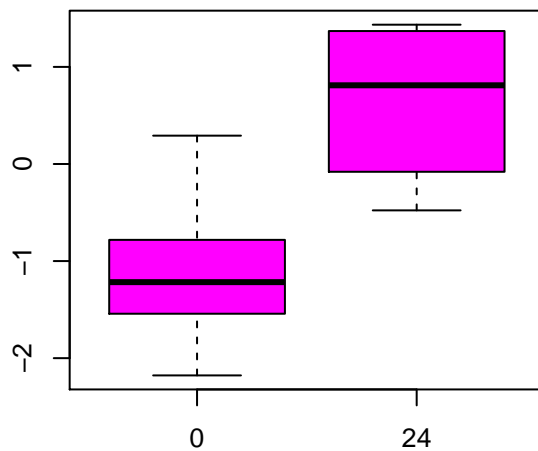

SKOV3

# 3-phosphoglycerate

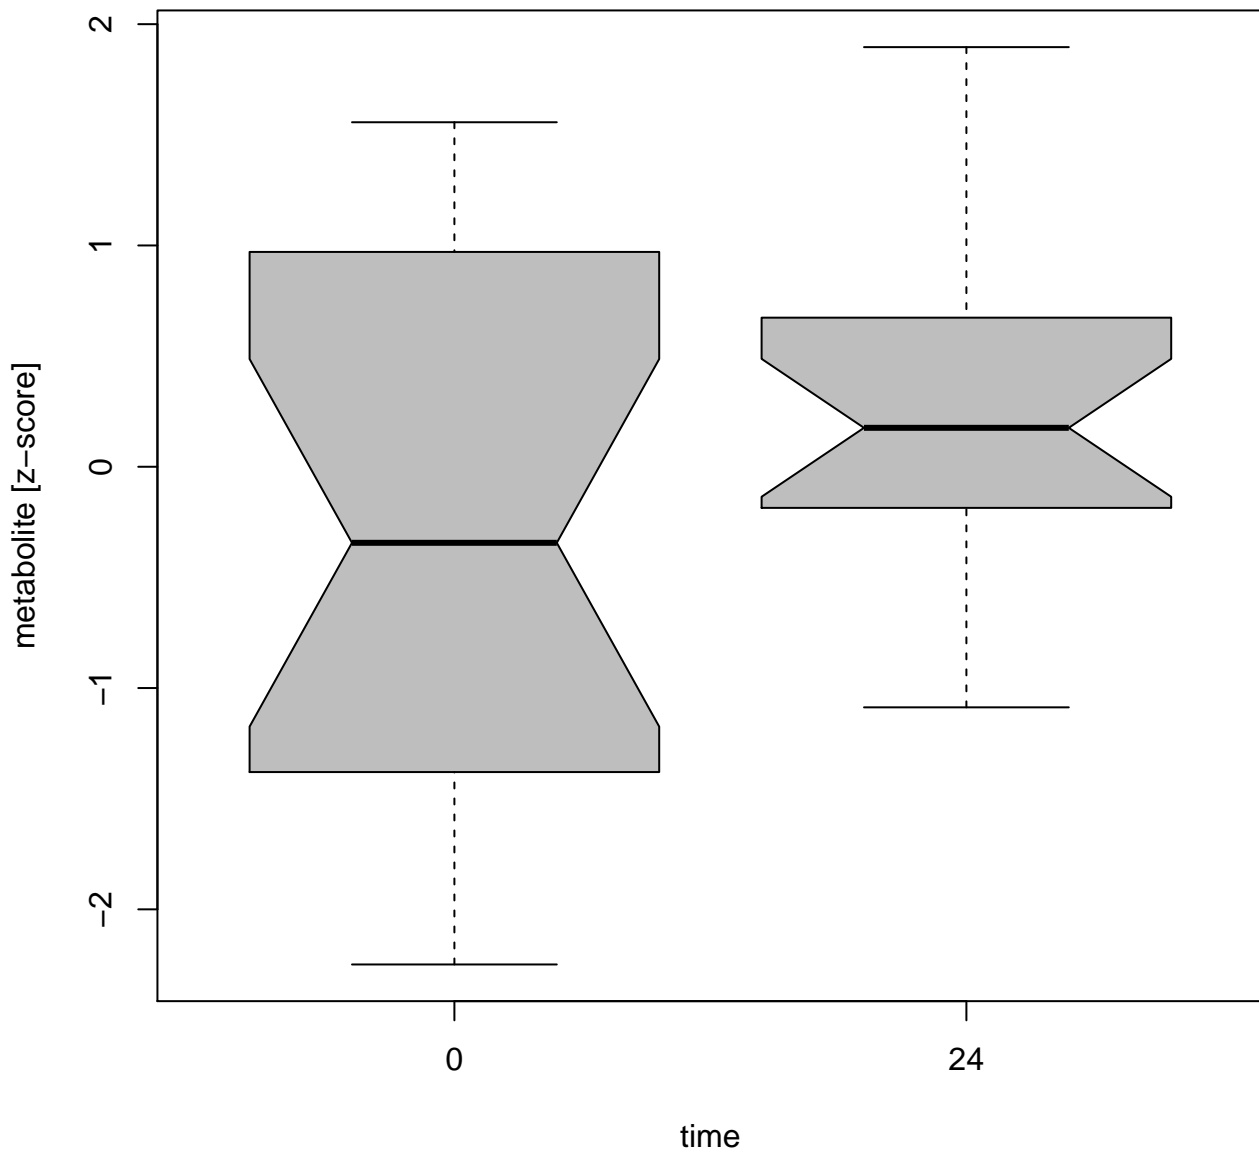

**5-methylthioadenosine (MTA)**

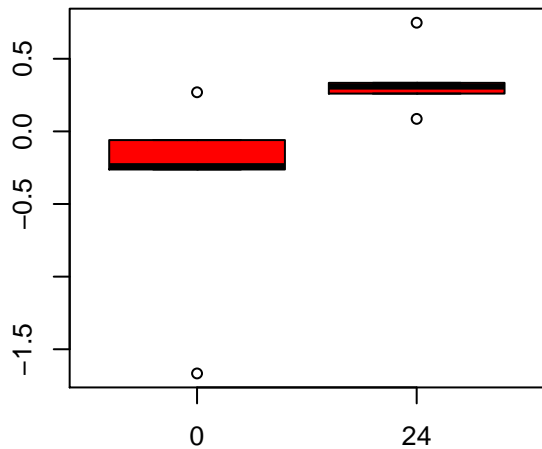

HCT116

**5-methylthioadenosine (MTA)**

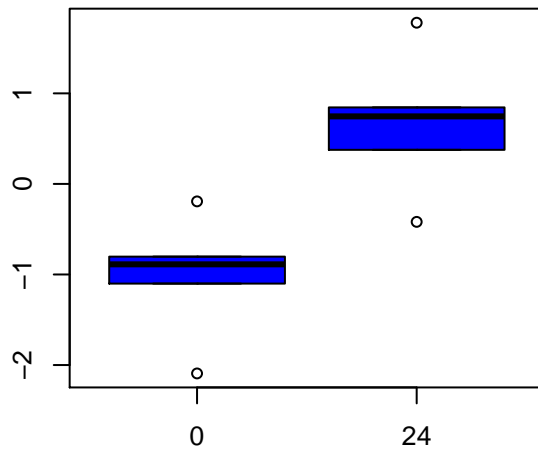

OVCAR

**5-methylthioadenosine (MTA)**

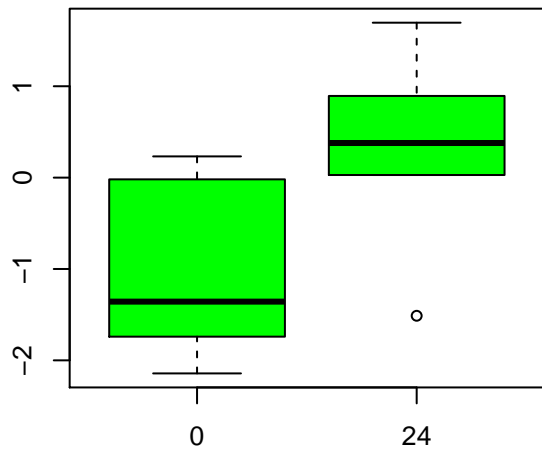

HCT15

**5-methylthioadenosine (MTA)**

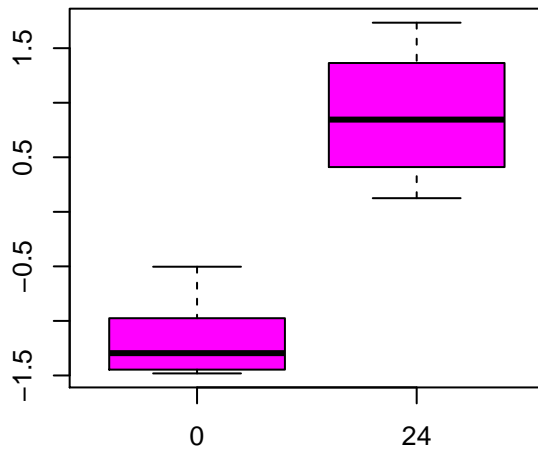

SKOV3



# 5-methylthioadenosine (MTA)

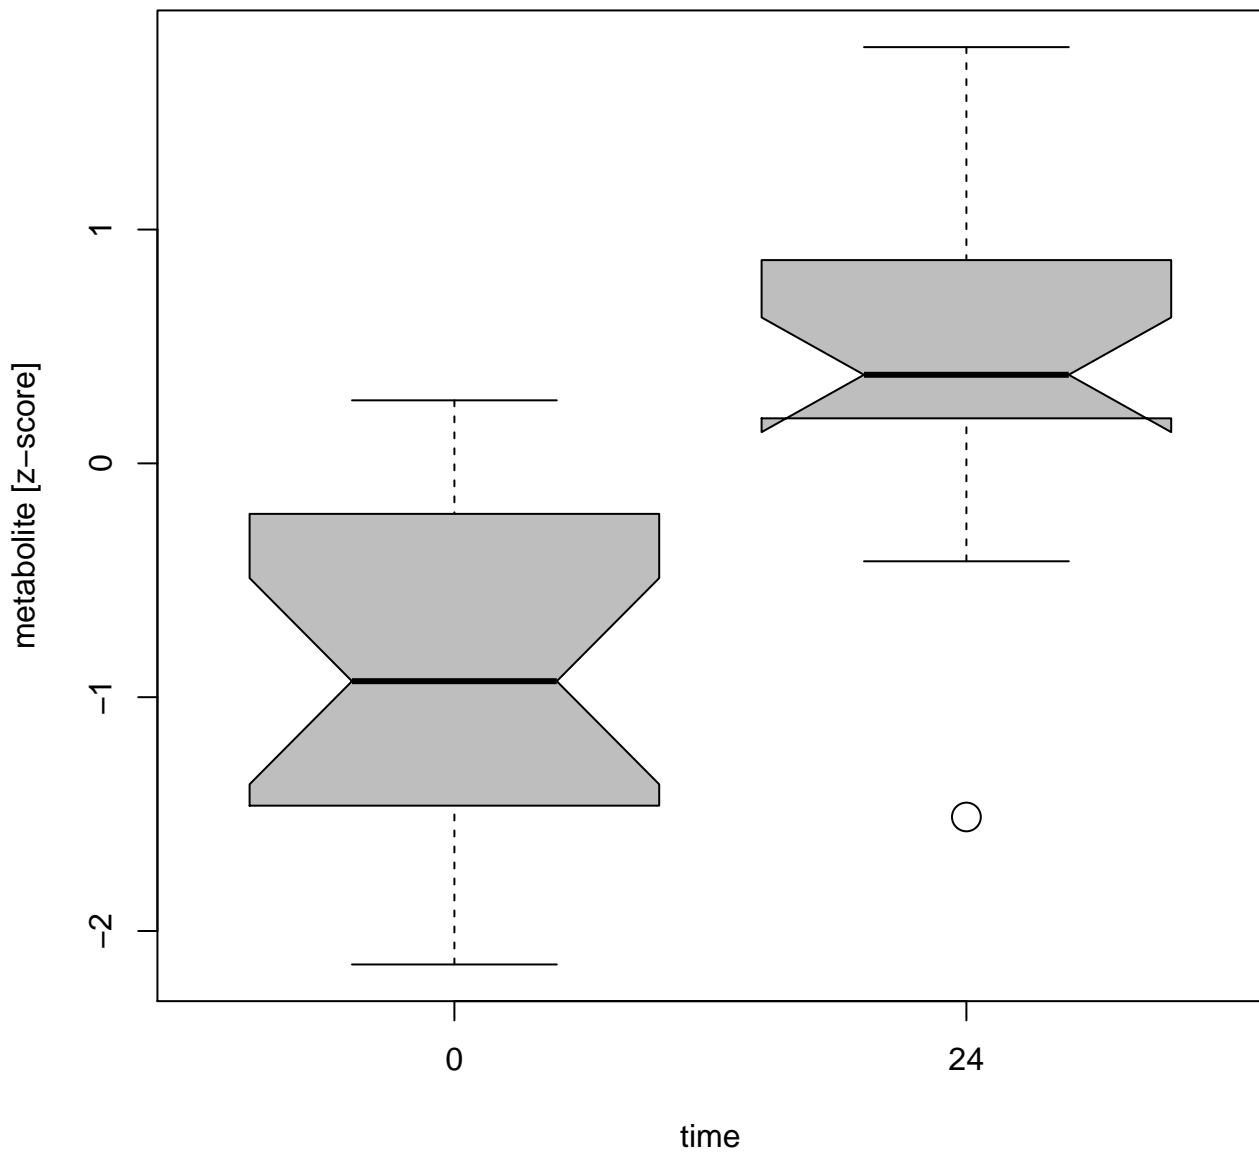

**5-oxoproline**

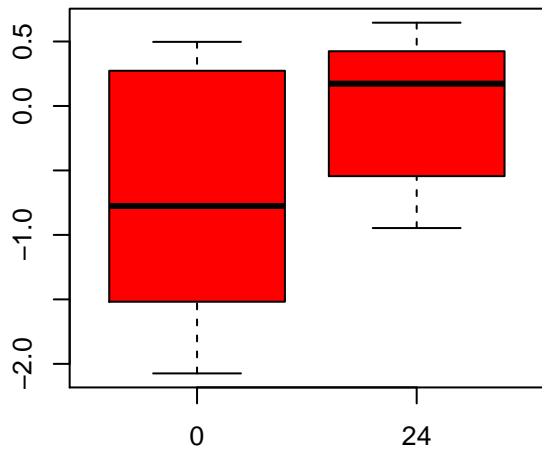

HCT116

**5-oxoproline**

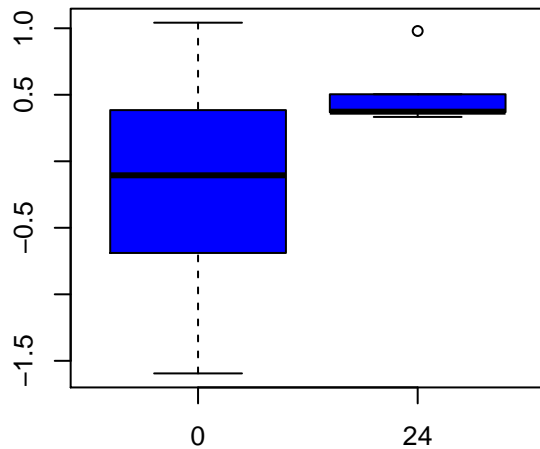

OVCAR

**5-oxoproline**

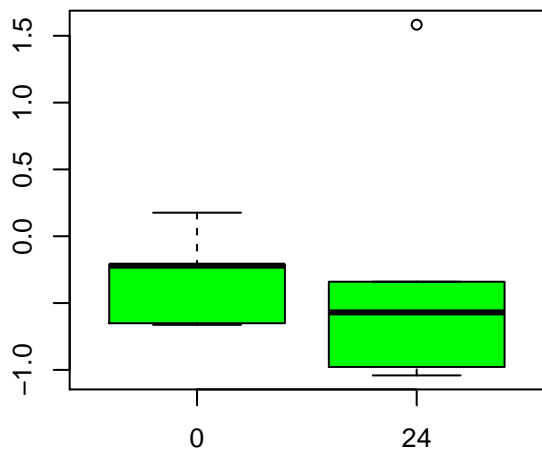

HCT15

**5-oxoproline**

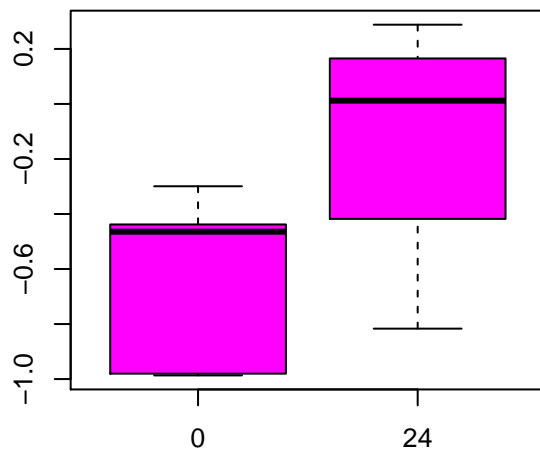

SKOV3

# 5-oxoproline

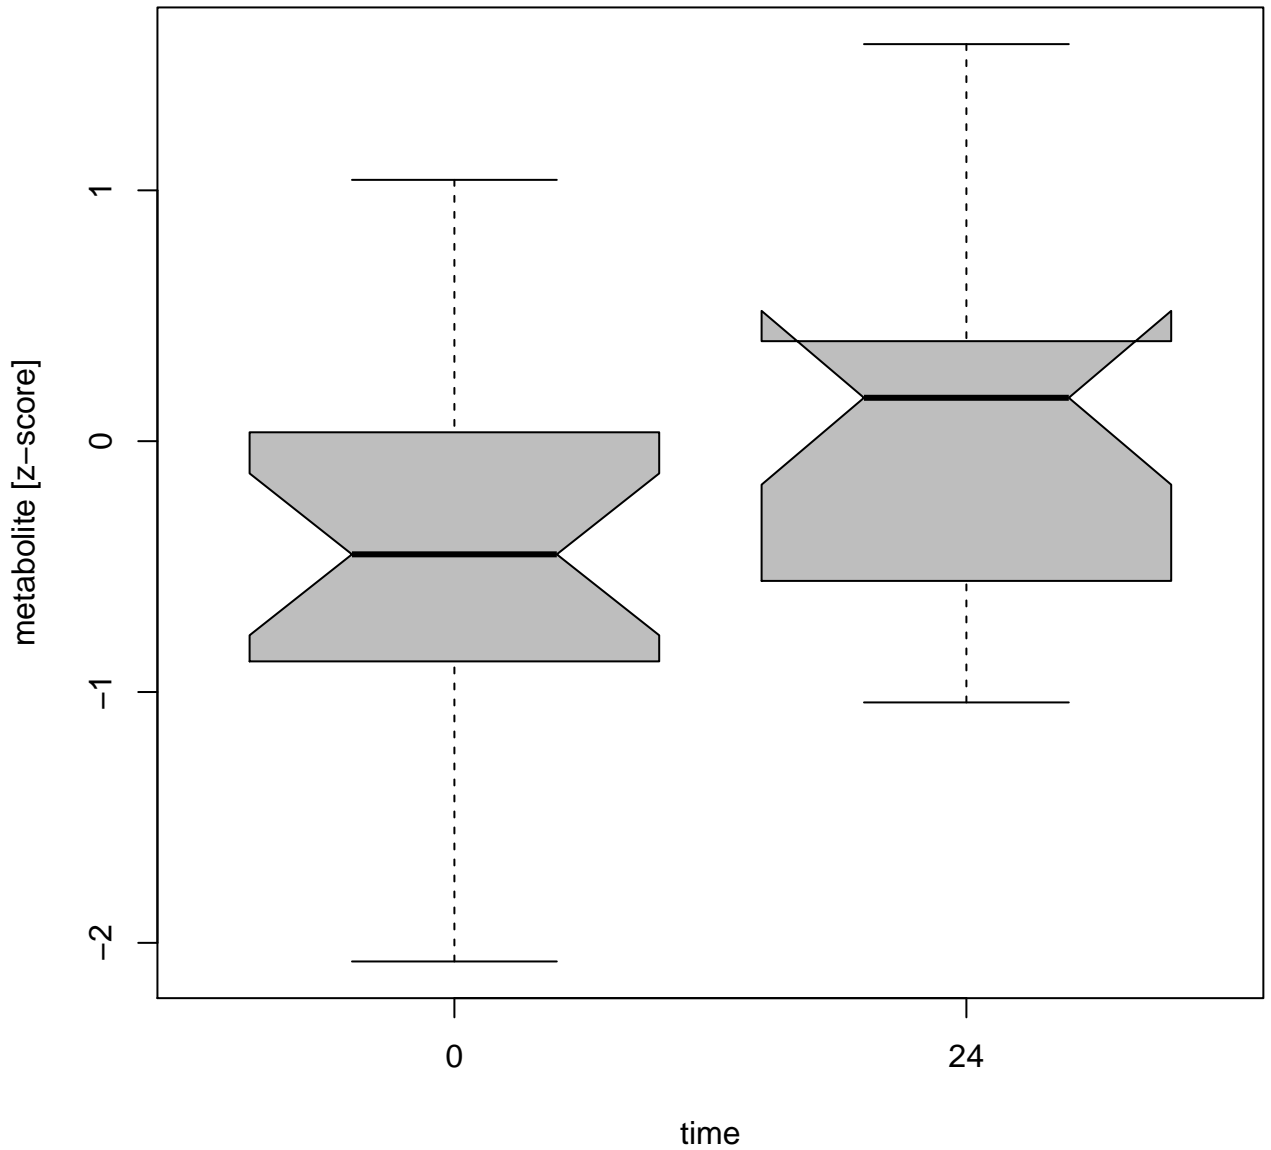

**acetylcarnitine**

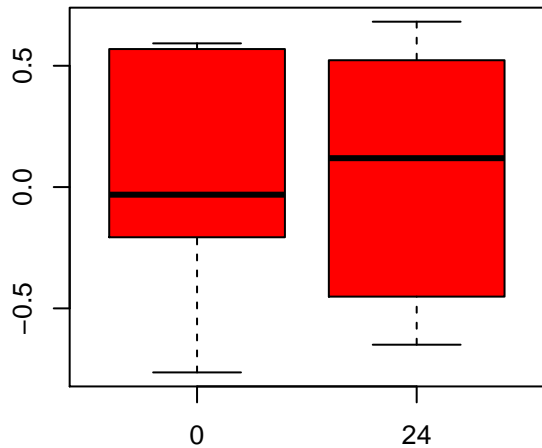

HCT116

**acetylcarnitine**

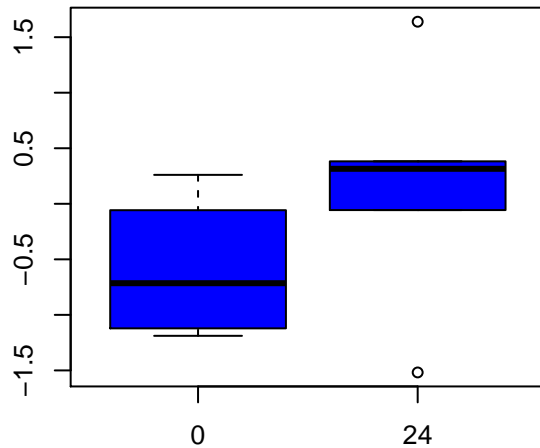

OVCAR

**acetylcarnitine**

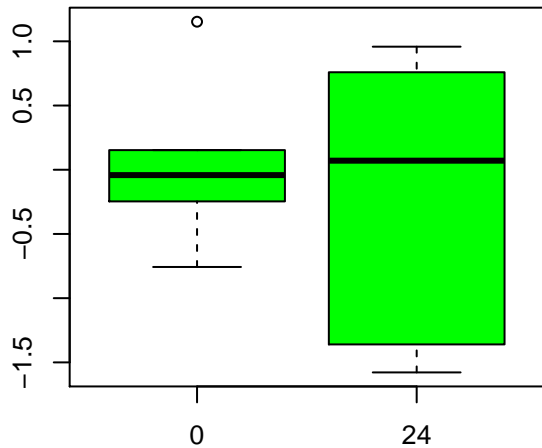

HCT15

**acetylcarnitine**

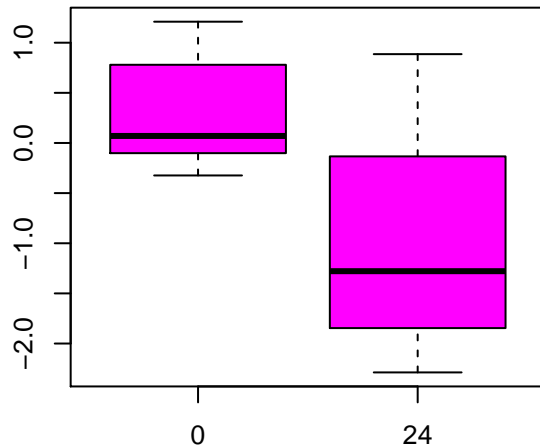

SKOV3

# acetylcarnitine

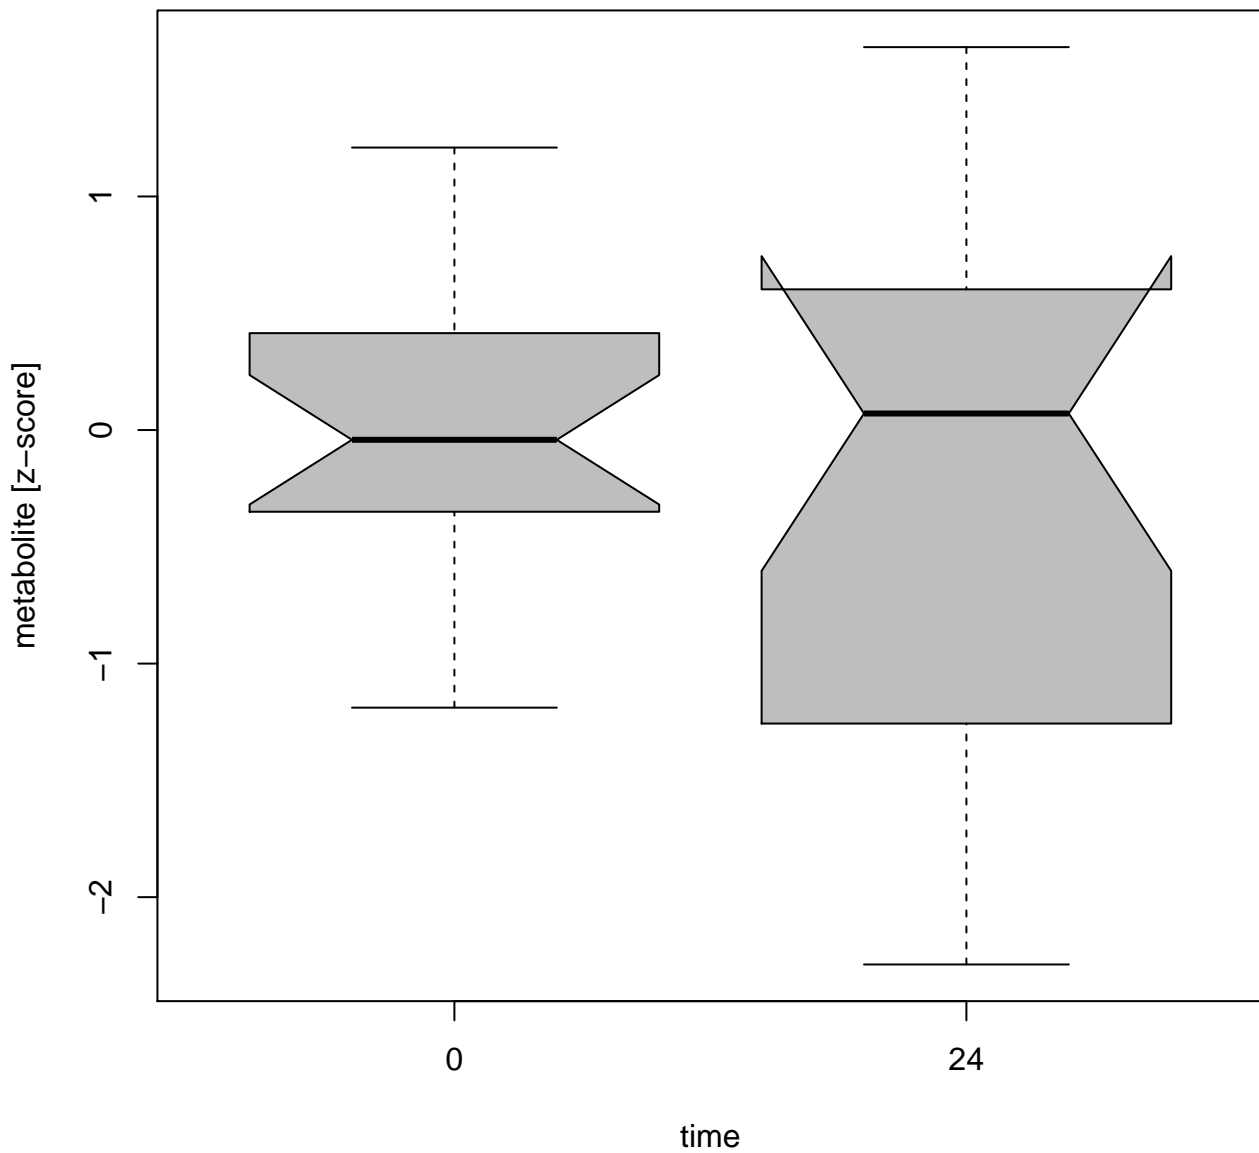

**adenine**

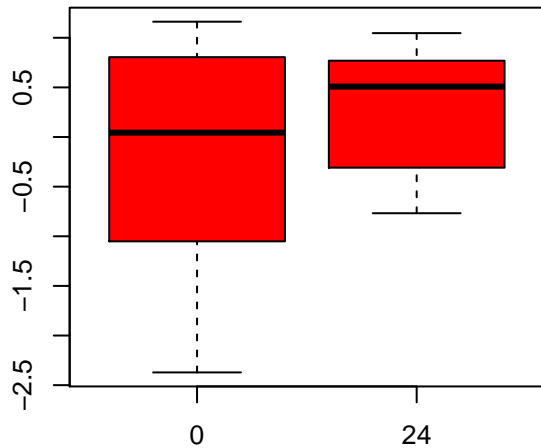

**adenine**

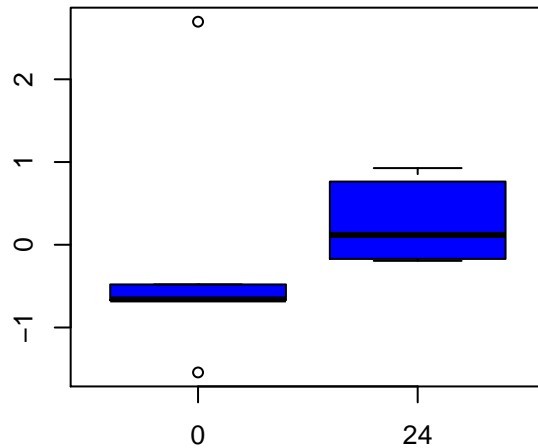

HCT116

OVCAR

**adenine**

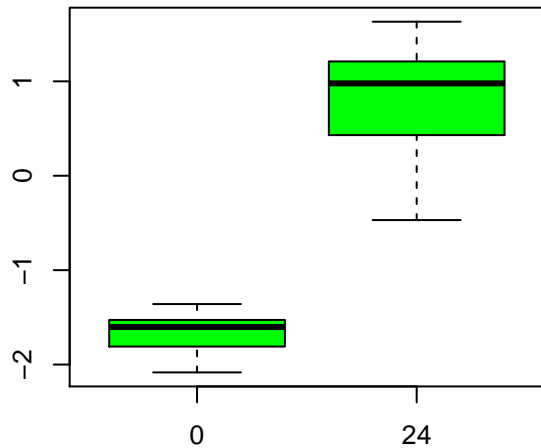

**adenine**

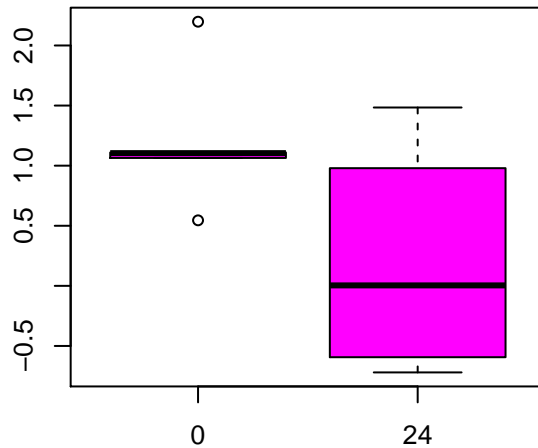

HCT15

SKOV3

# adenine

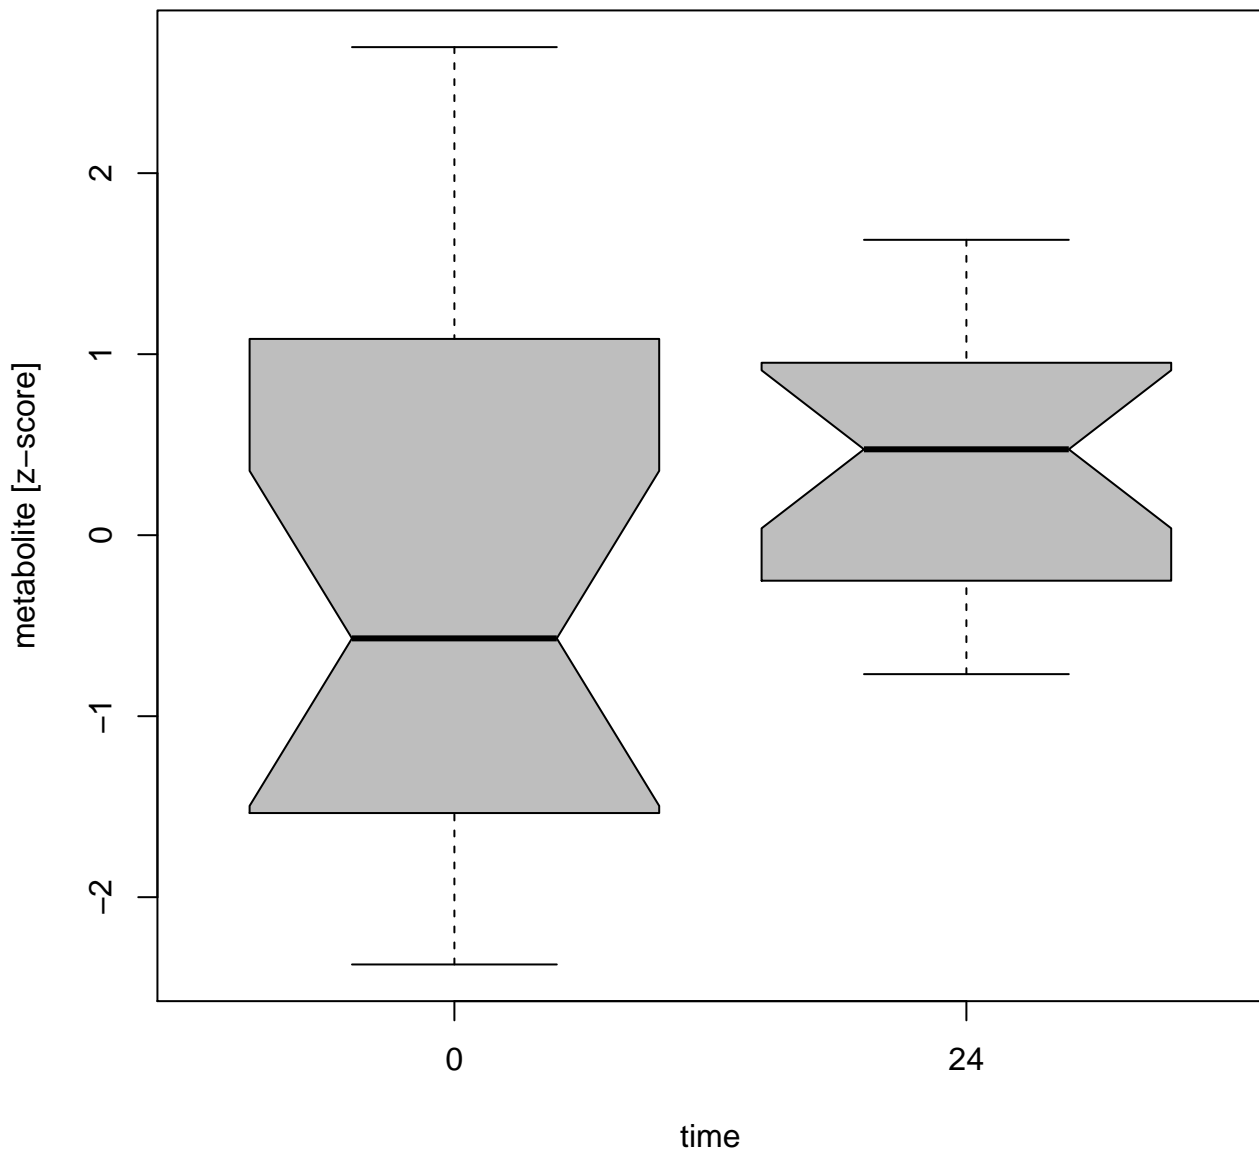

**adenosine**

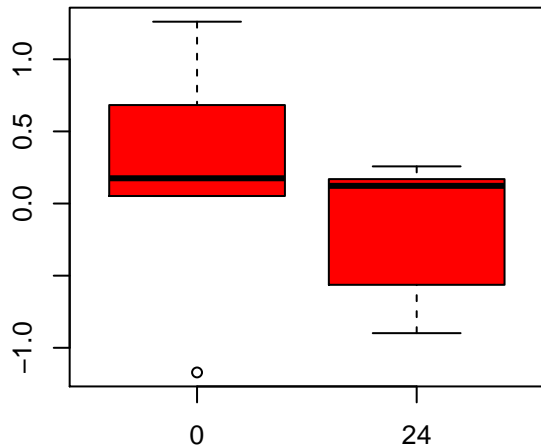

HCT116

**adenosine**

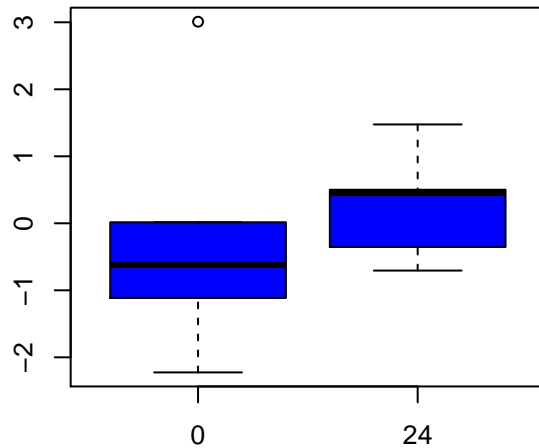

OVCAR

**adenosine**

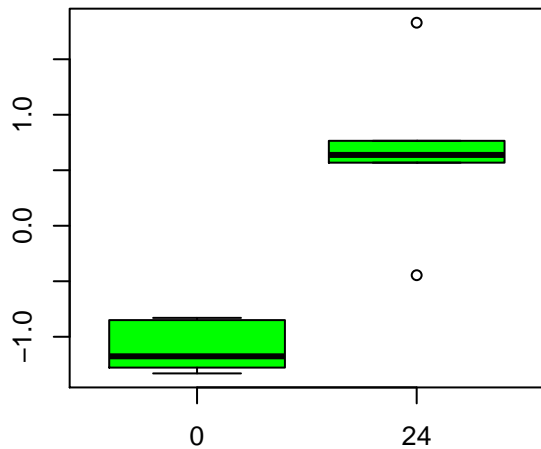

HCT15

**adenosine**

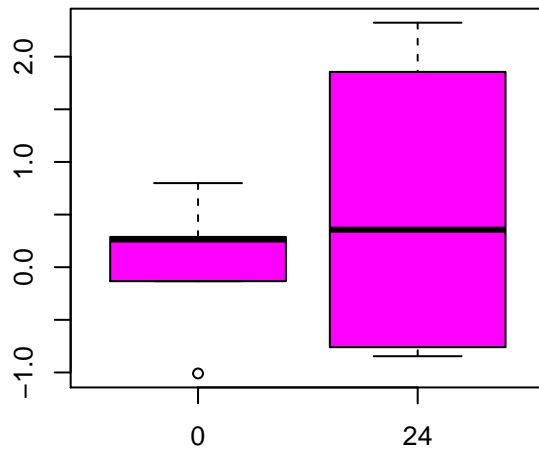

SKOV3



# adenosine

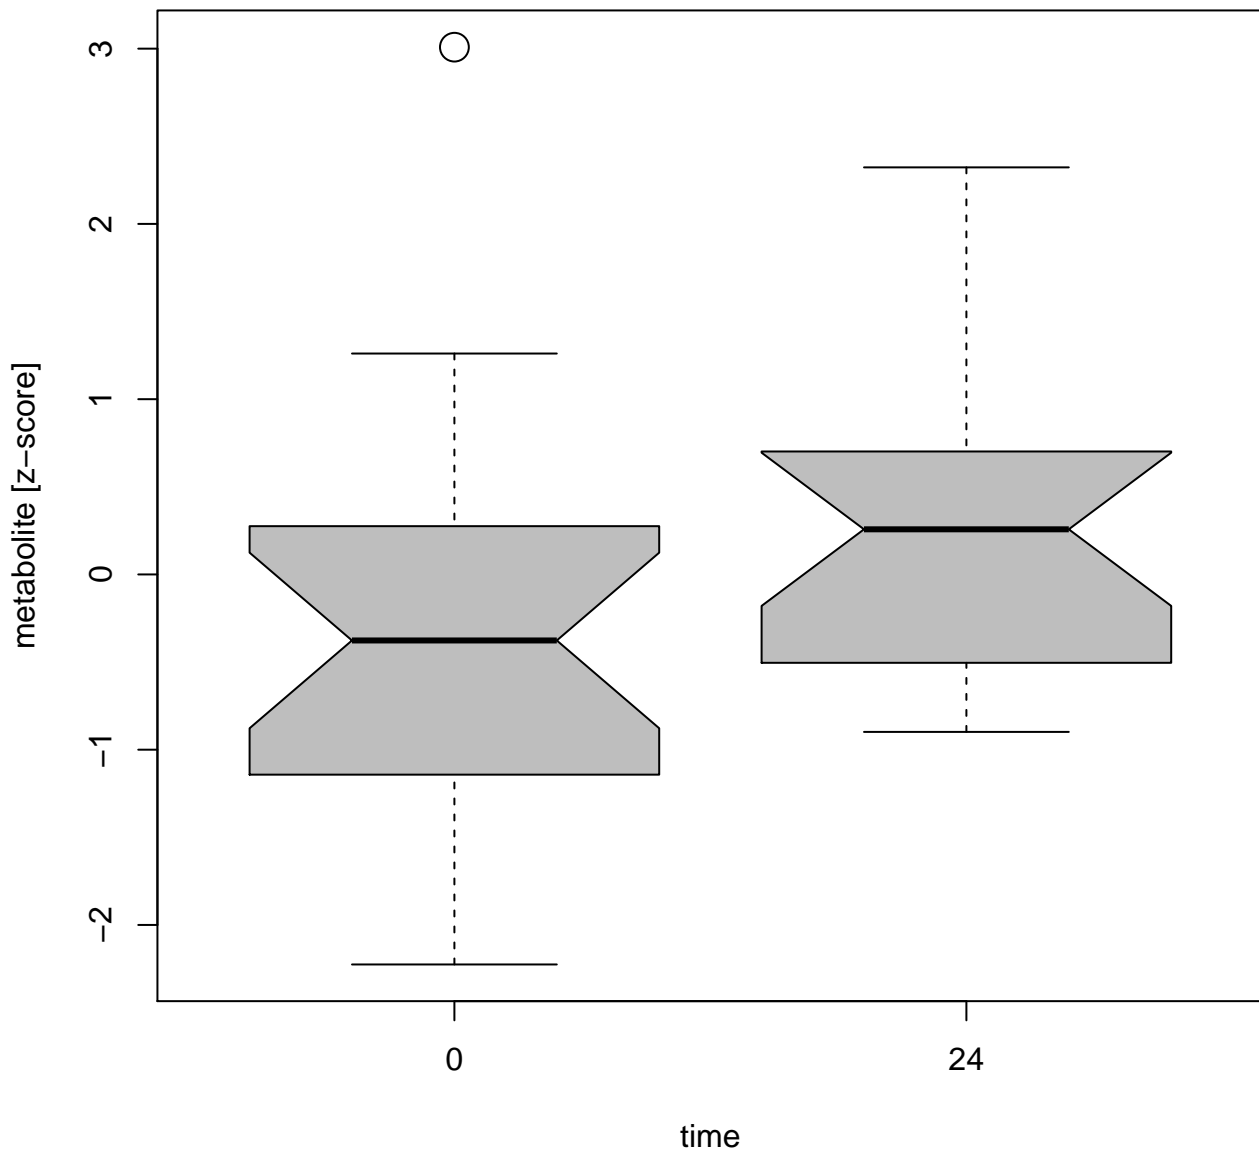

adenosine 3'-monophosphate (3'-AMP)

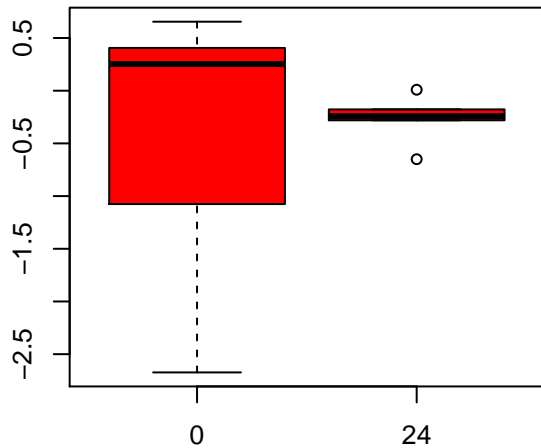

HCT116

adenosine 3'-monophosphate (3'-AMP)

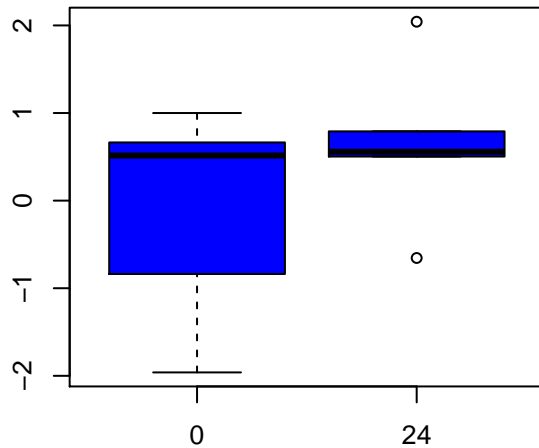

OVCAR

adenosine 3'-monophosphate (3'-AMP)

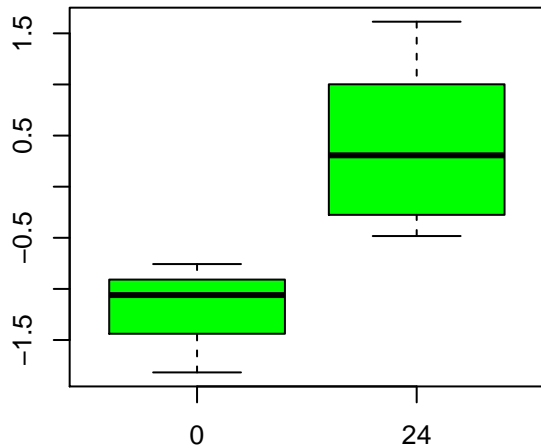

HCT15

adenosine 3'-monophosphate (3'-AMP)

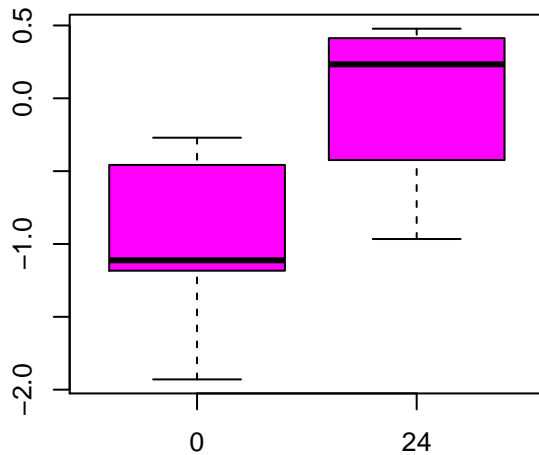

SKOV3

# adenosine 3'-monophosphate (3'-AMP)

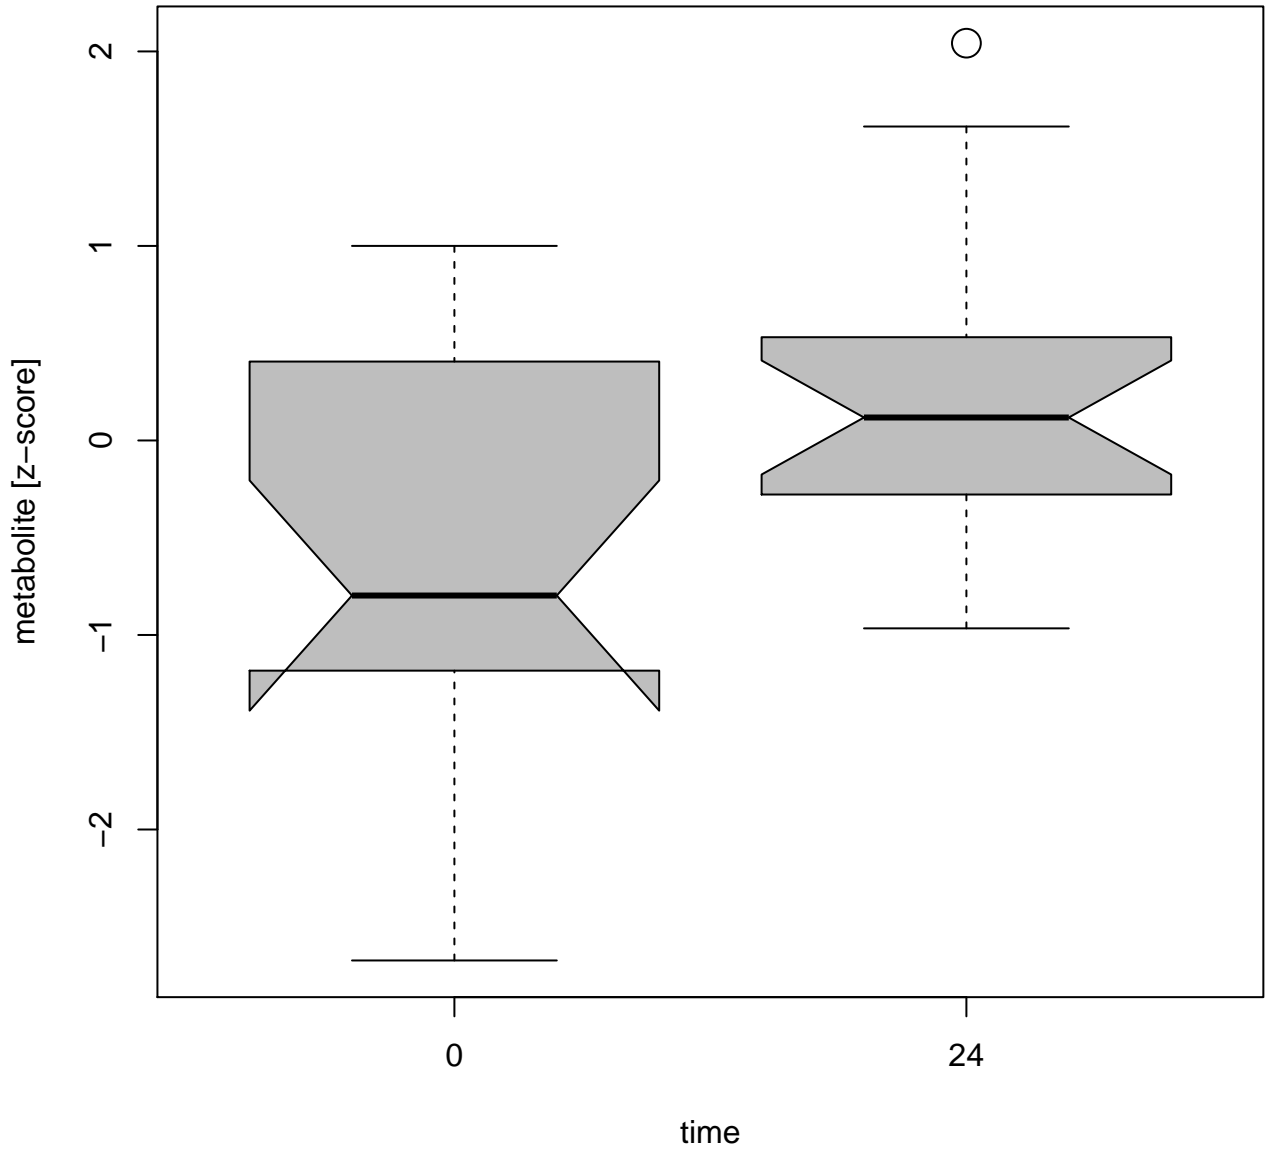

**adenosine 5'-diphosphate (ADP)**

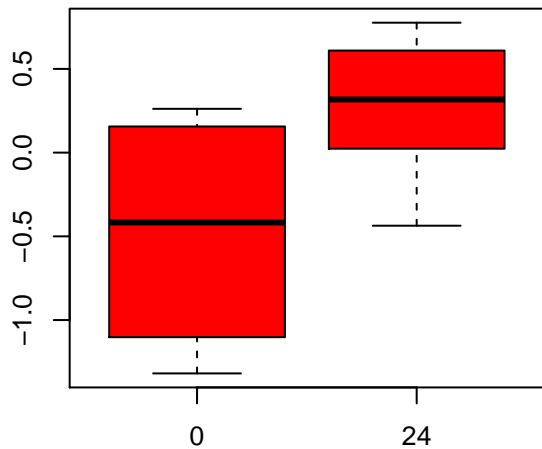

HCT116

**adenosine 5'-diphosphate (ADP)**

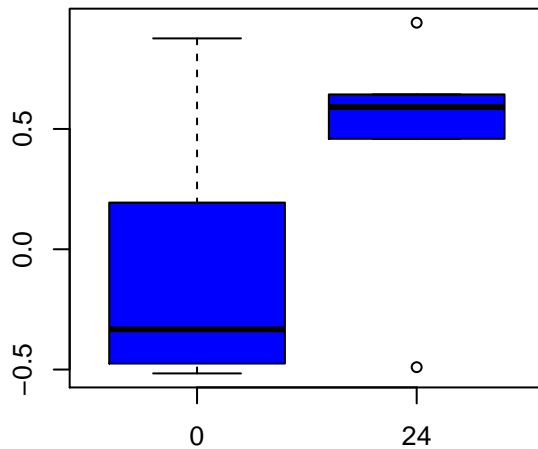

OVCAR

**adenosine 5'-diphosphate (ADP)**

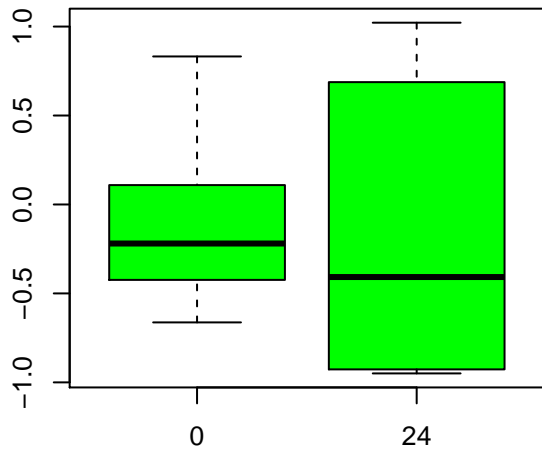

HCT15

**adenosine 5'-diphosphate (ADP)**

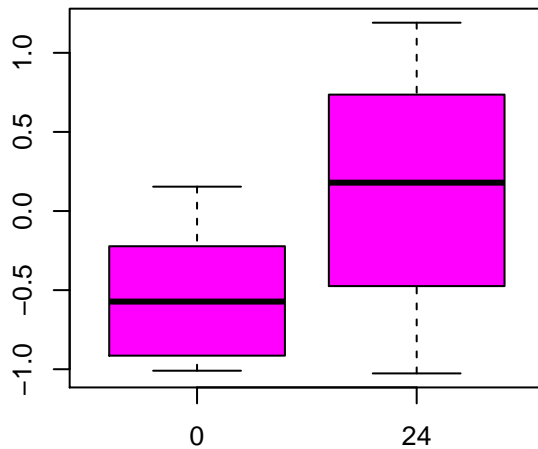

SKOV3

# adenosine 5'-diphosphate (ADP)

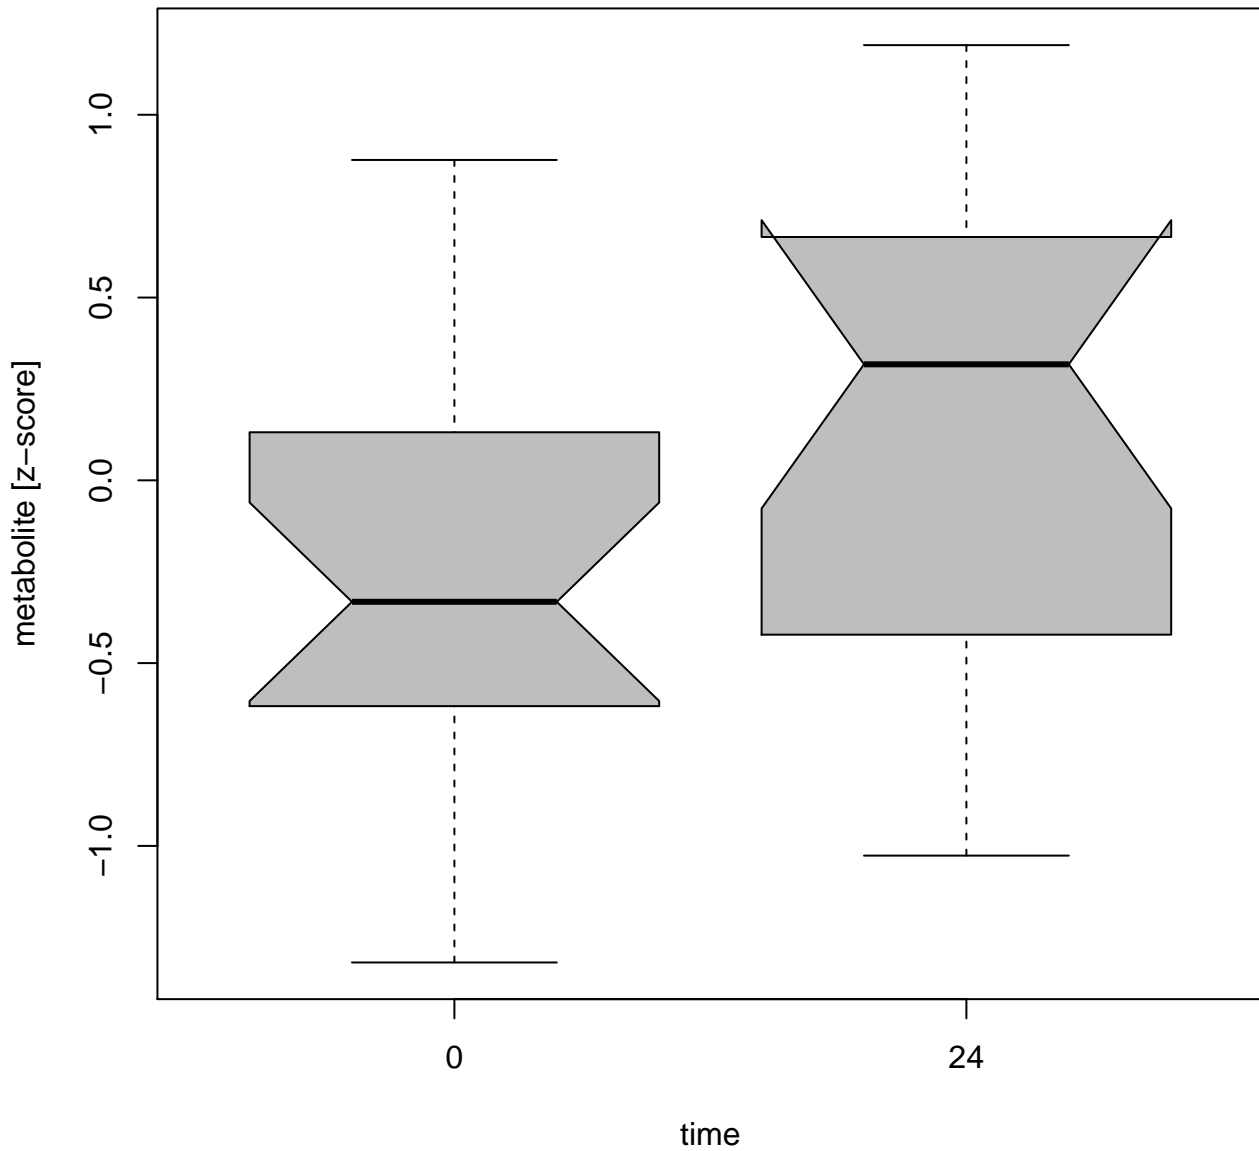

**adenosine 5'-monophosphate (AMP)**

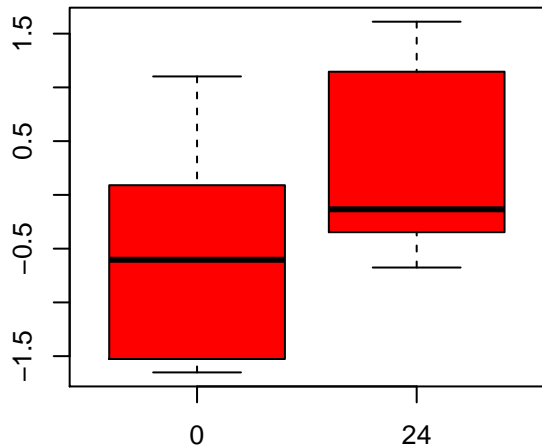

HCT116

**adenosine 5'-monophosphate (AMP)**

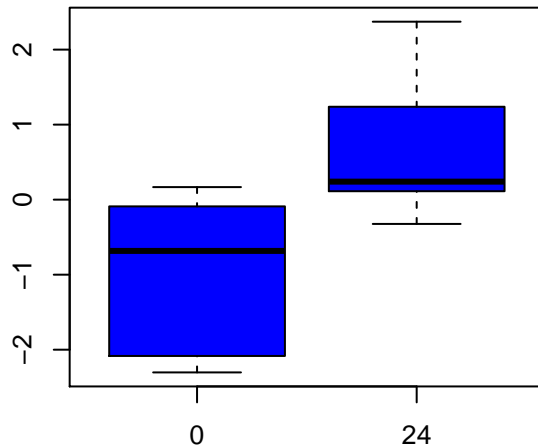

OVCAR

**adenosine 5'-monophosphate (AMP)**

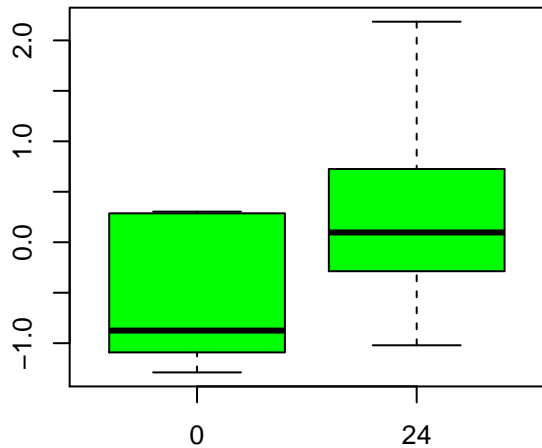

HCT15

**adenosine 5'-monophosphate (AMP)**

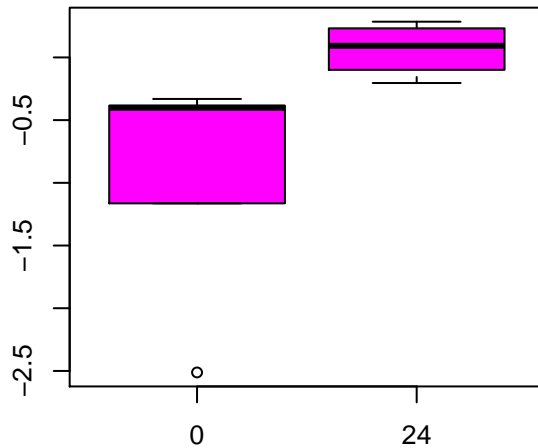

SKOV3

# adenosine 5'-monophosphate (AMP)

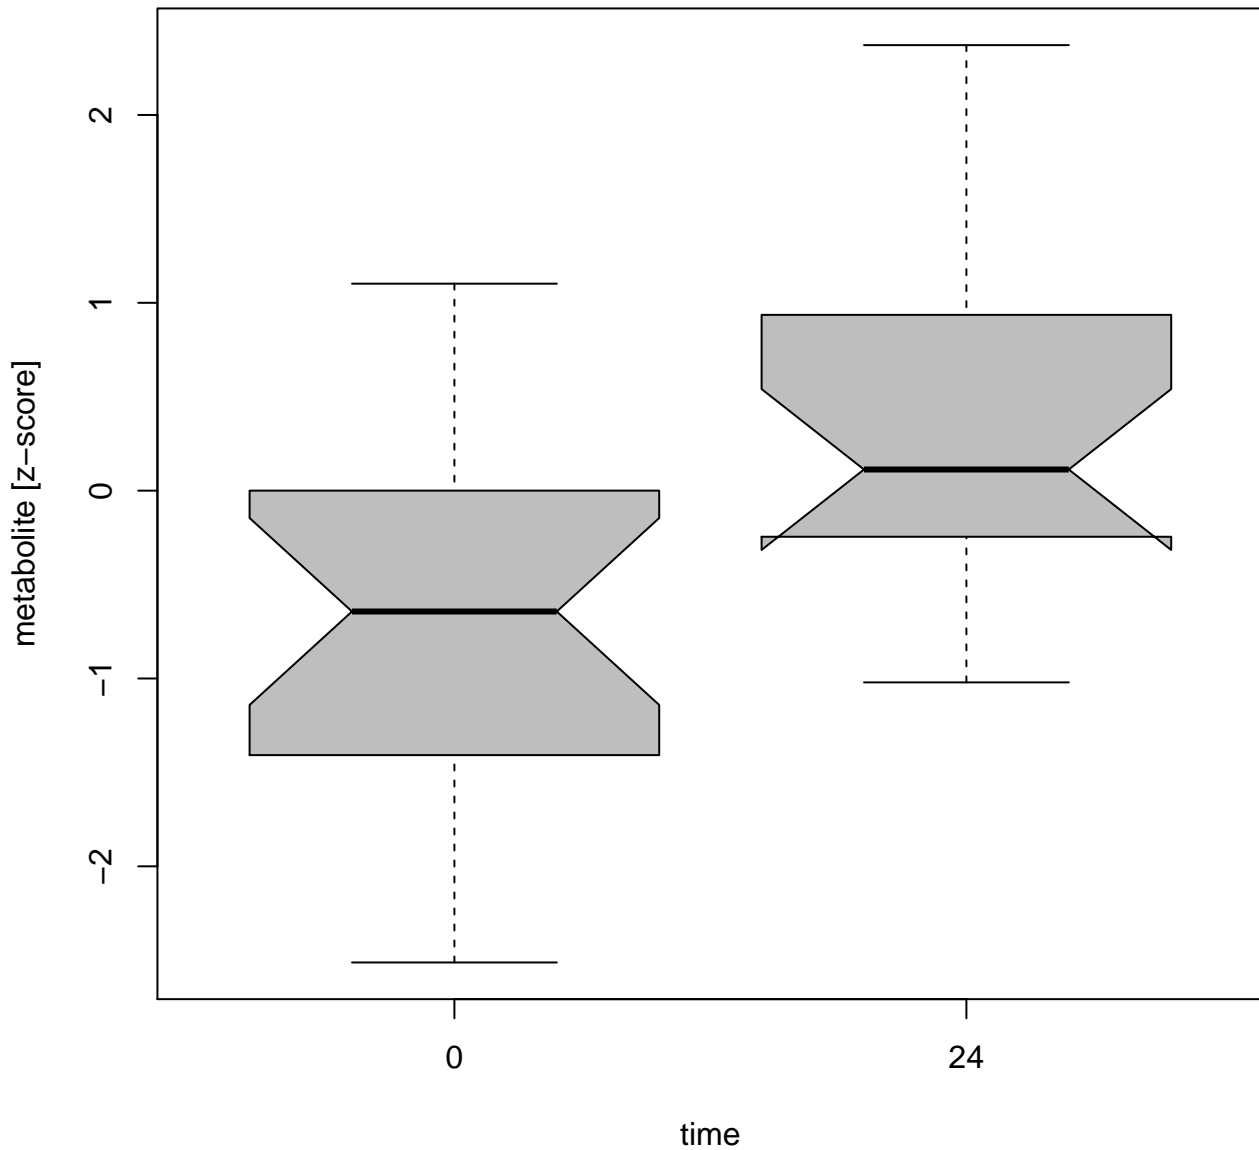

**adenosine 5'diphosphoribose**

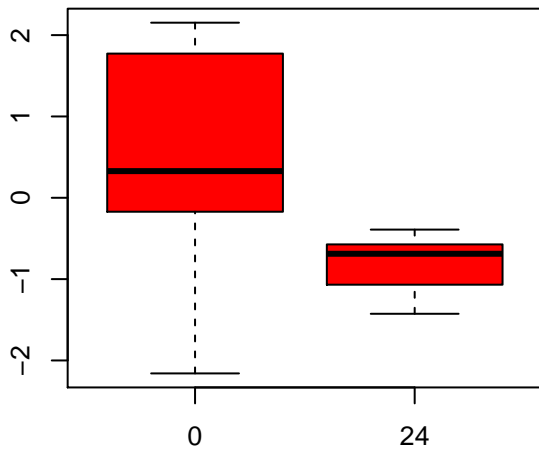

HCT116

**adenosine 5'diphosphoribose**

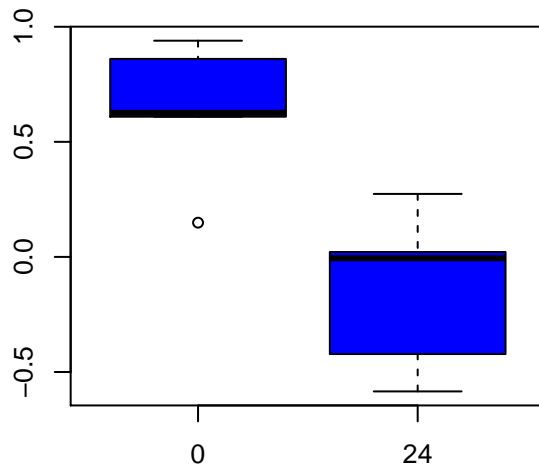

OVCAR

**adenosine 5'diphosphoribose**

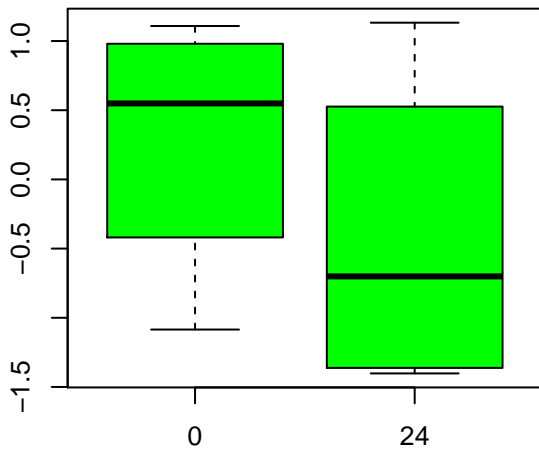

HCT15

**adenosine 5'diphosphoribose**

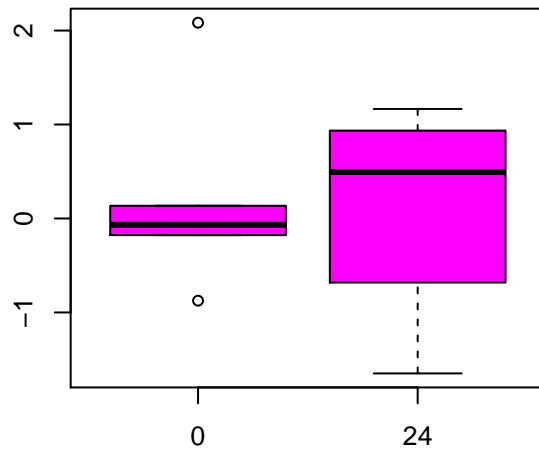

SKOV3



# adenosine 5'diphosphoribose

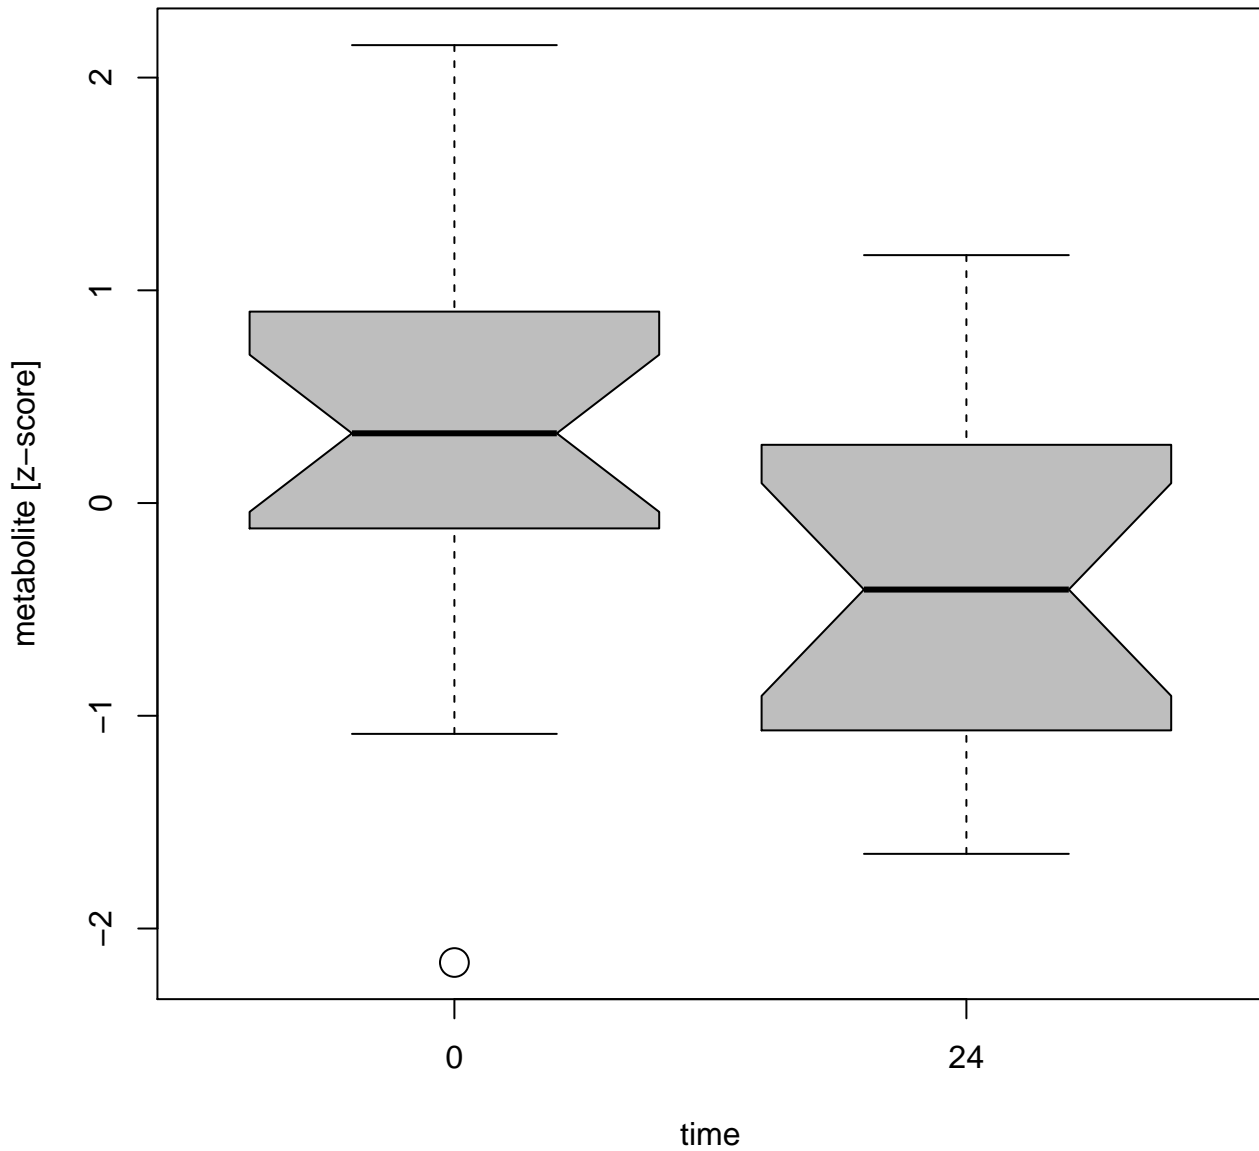

**alanine**

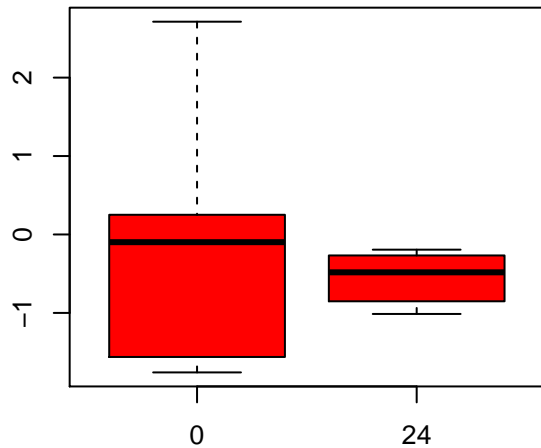

HCT116

**alanine**

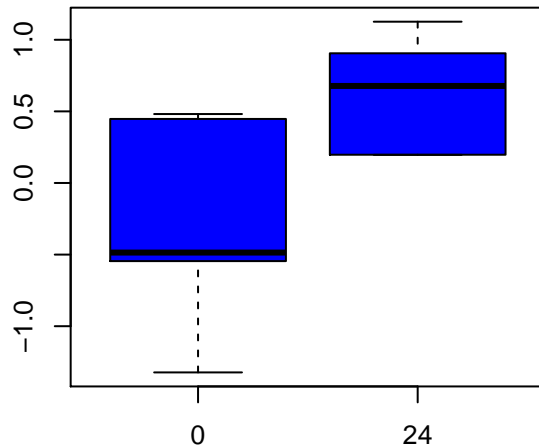

OVCAR

**alanine**

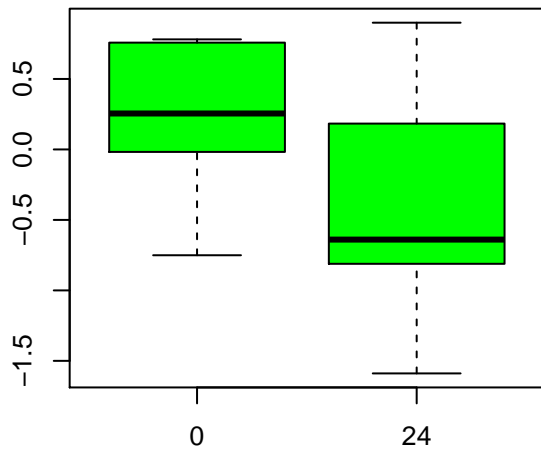

HCT15

**alanine**

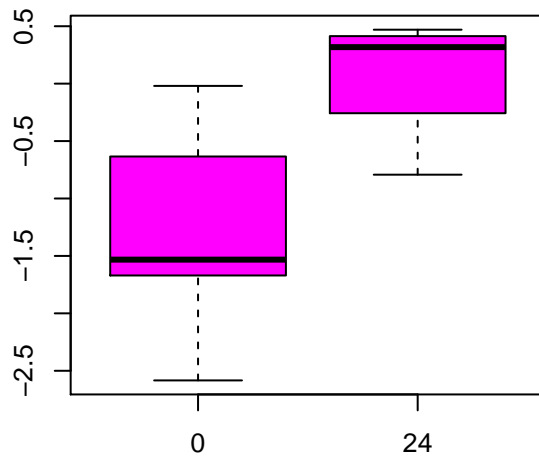

SKOV3

# alanine

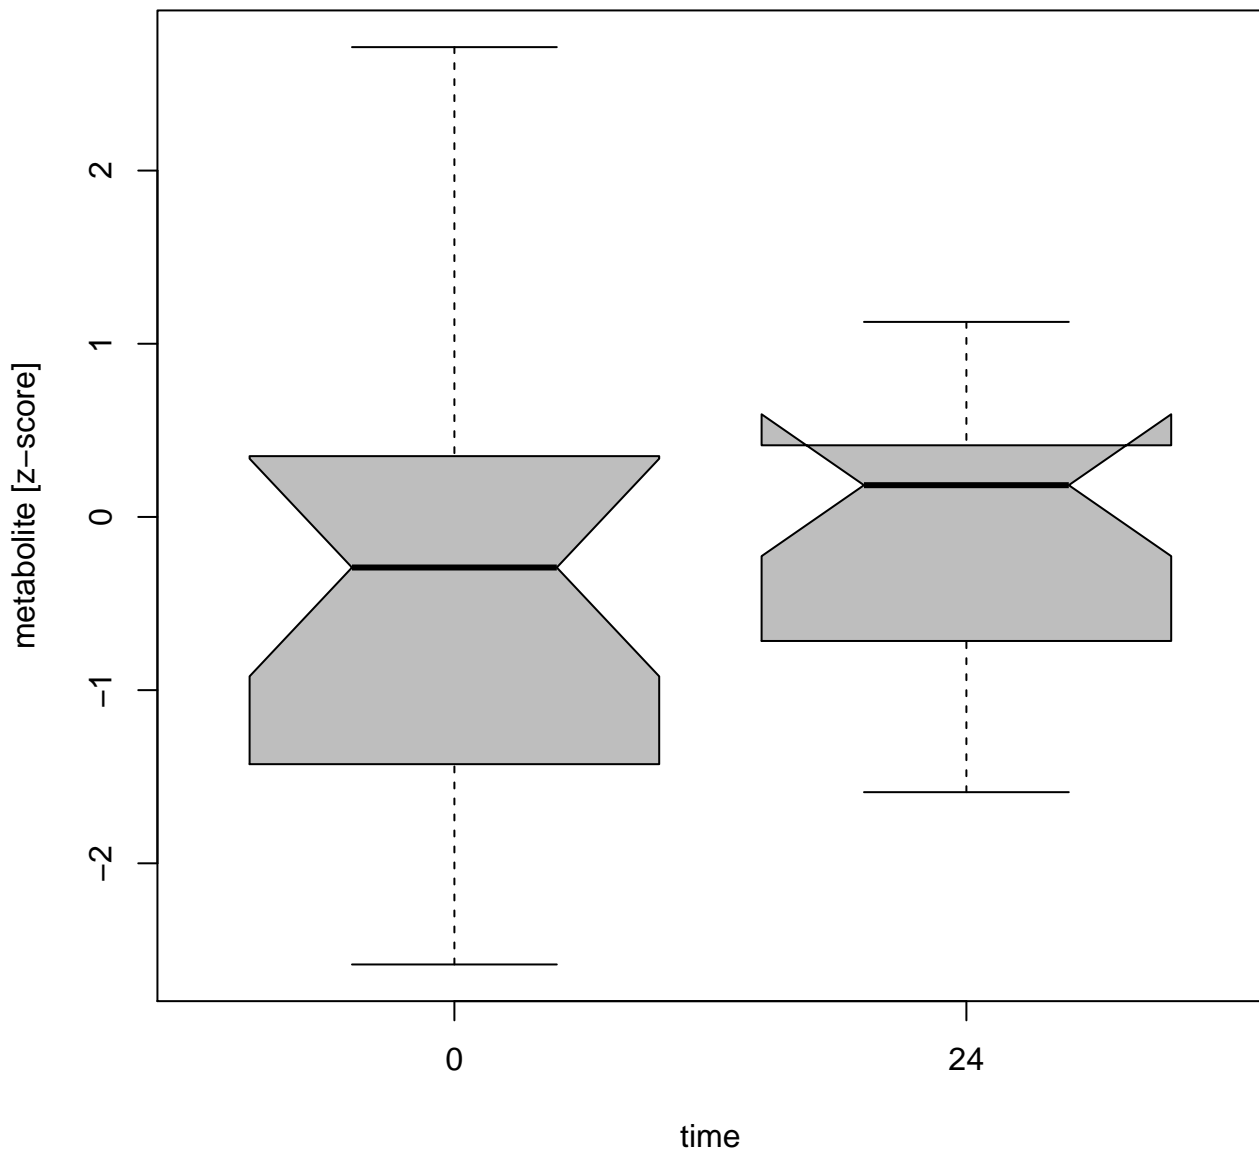

**alanylleucine**

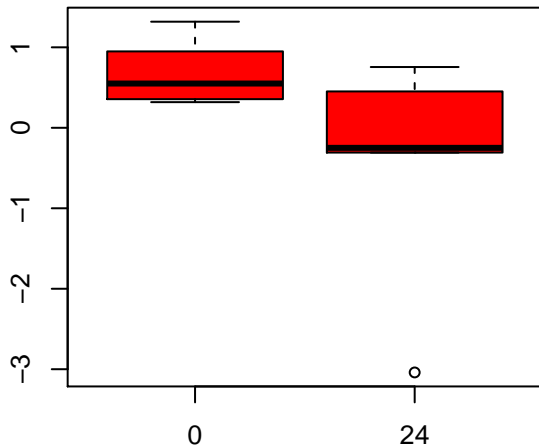

HCT116

**alanylleucine**

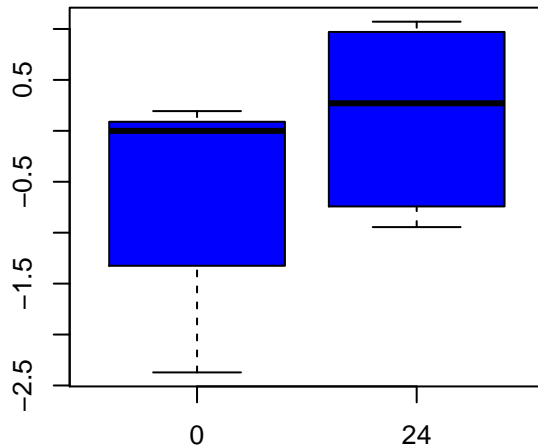

OVCAR

**alanylleucine**

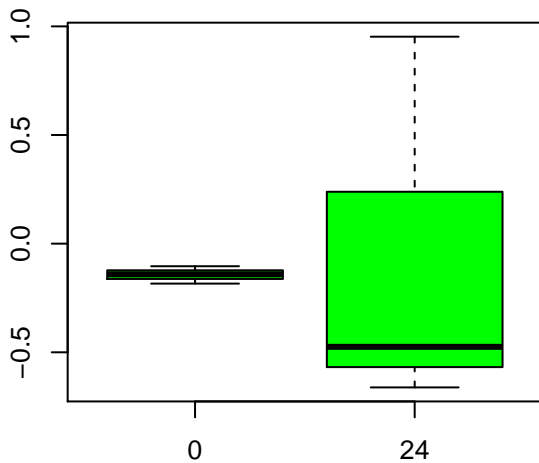

HCT15

**alanylleucine**

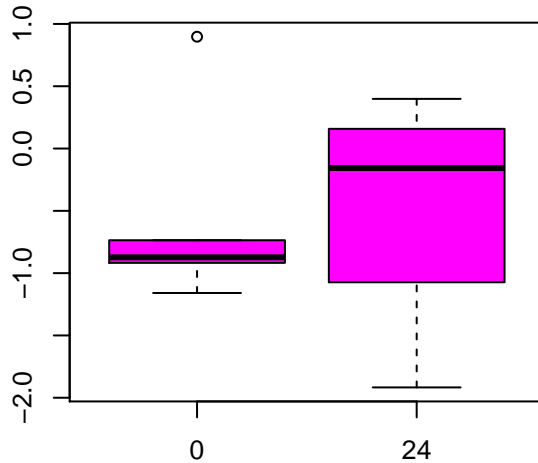

SKOV3

# alanylleucine

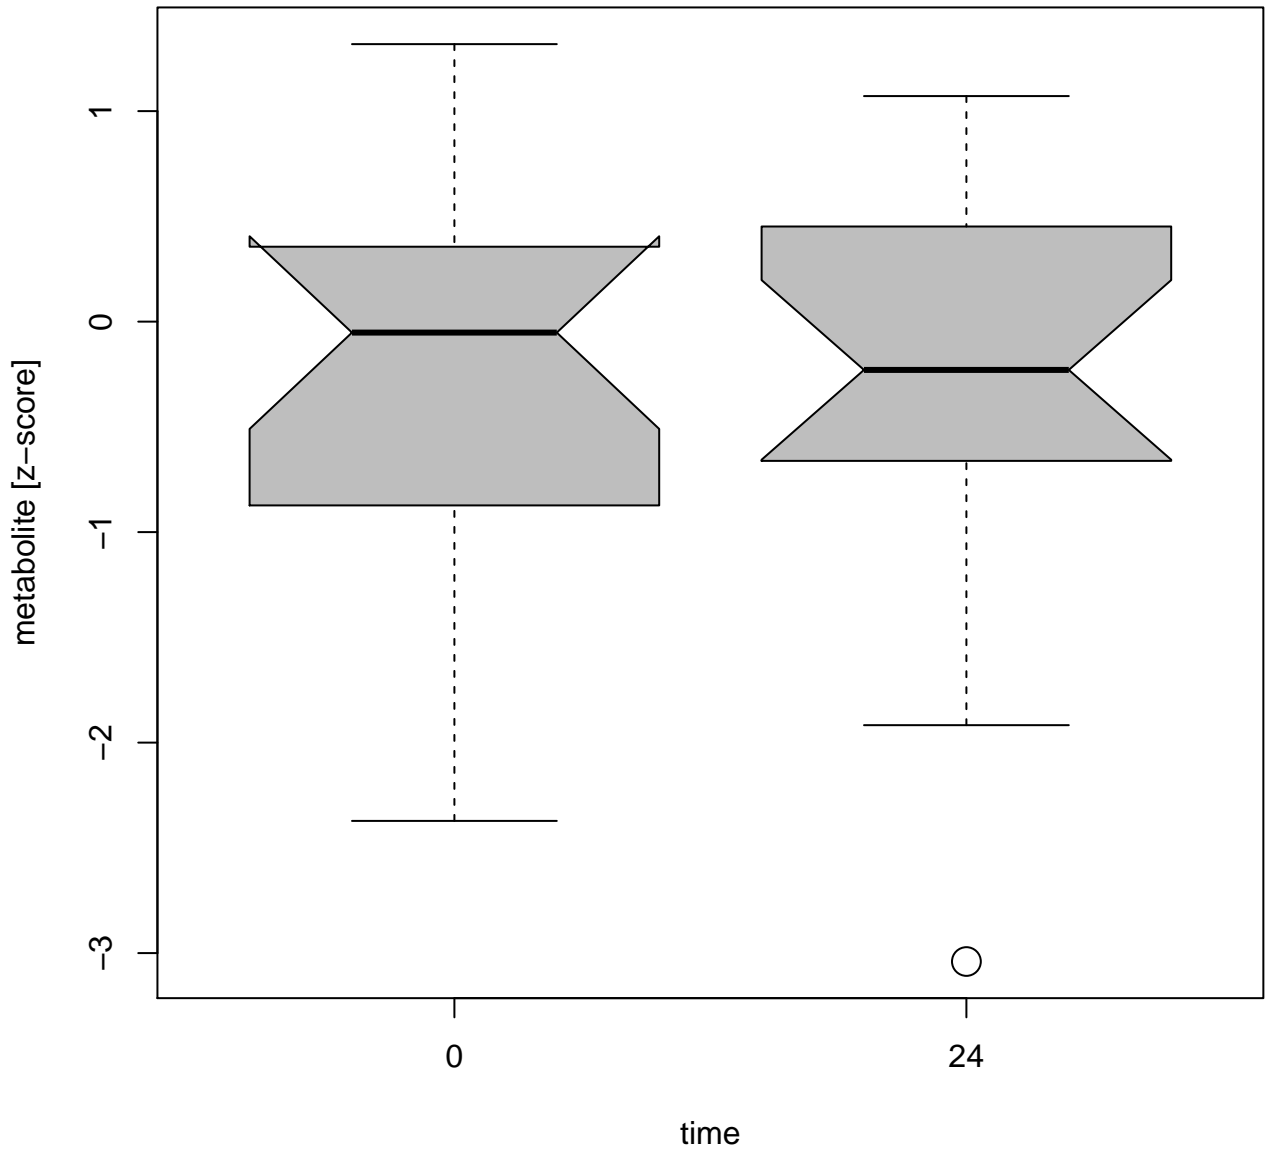

**arachidonate (20:4n6)**

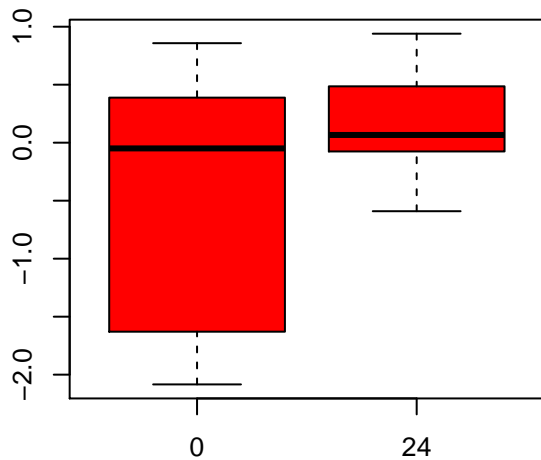

HCT116

**arachidonate (20:4n6)**

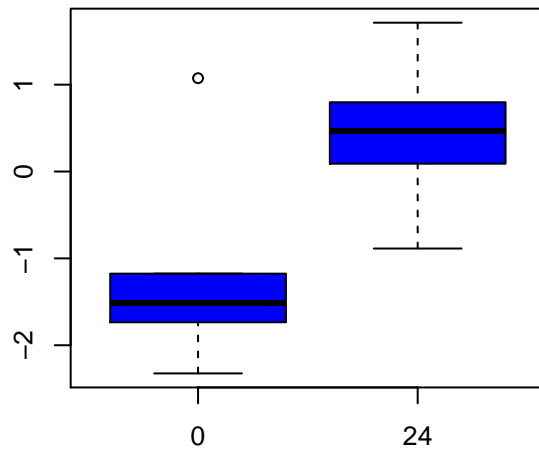

OVCAR

**arachidonate (20:4n6)**

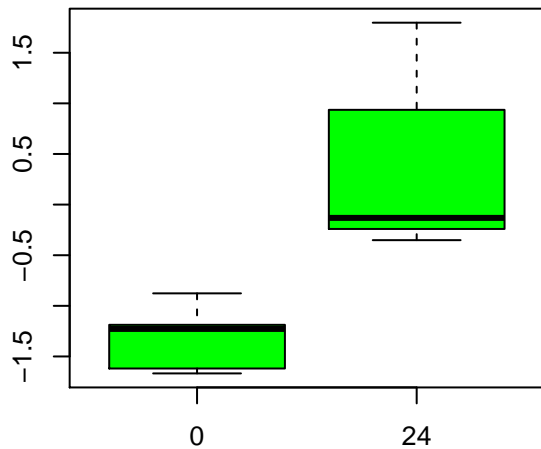

HCT15

**arachidonate (20:4n6)**

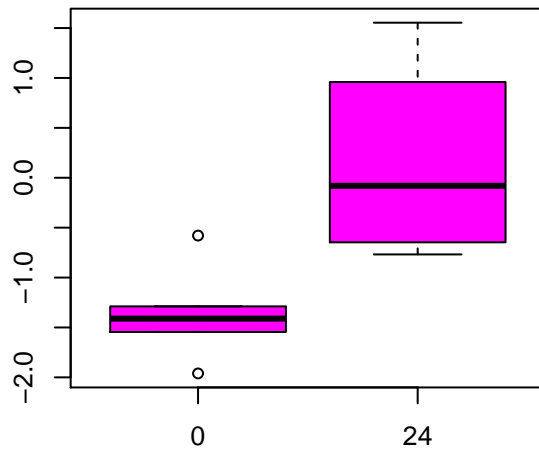

SKOV3

# arachidonate (20:4n6)

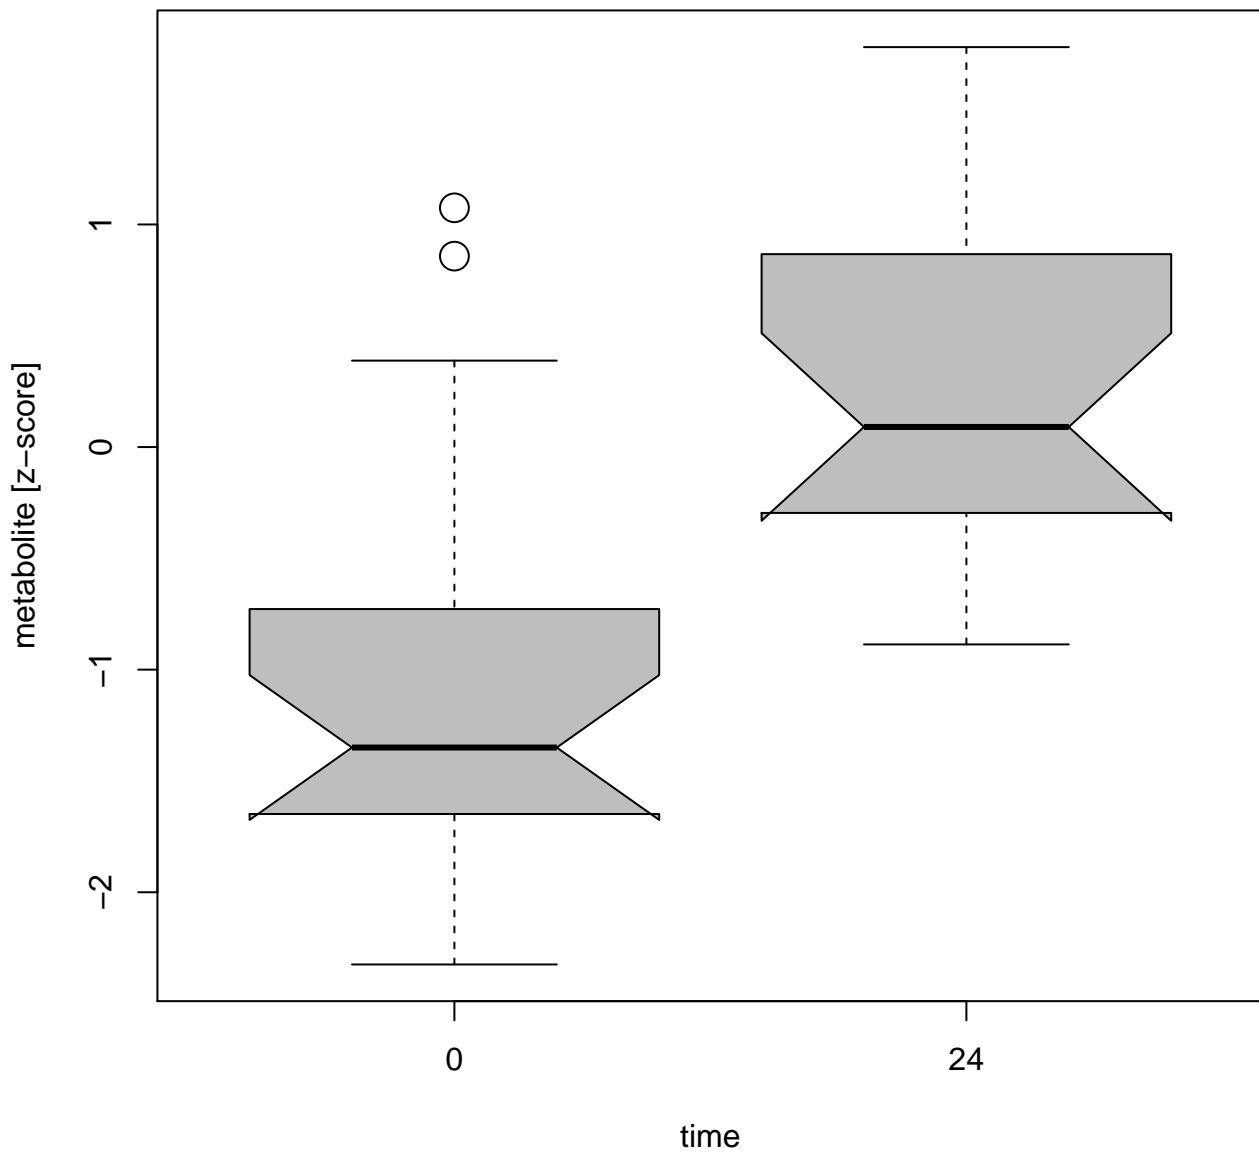

**arginine**

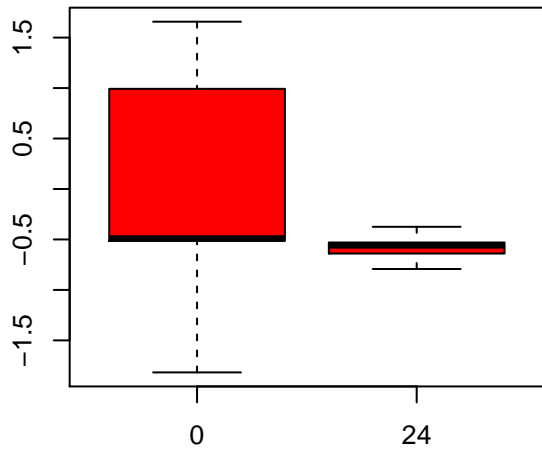

HCT116

**arginine**

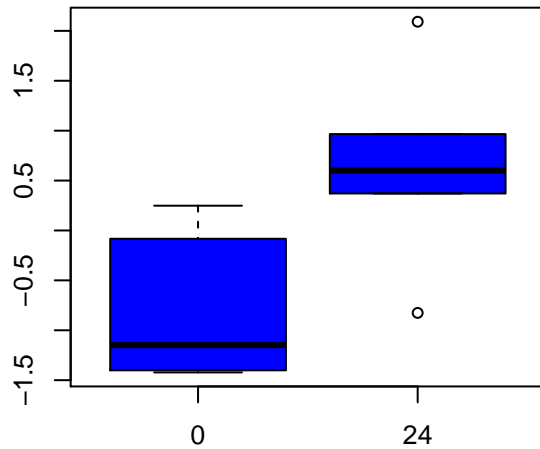

OVCAR

**arginine**

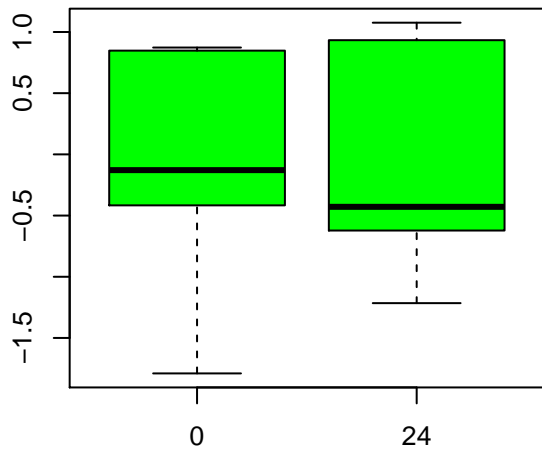

HCT15

**arginine**

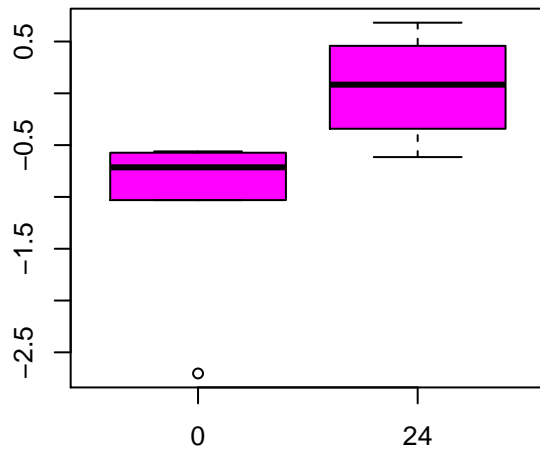

SKOV3



# arginine

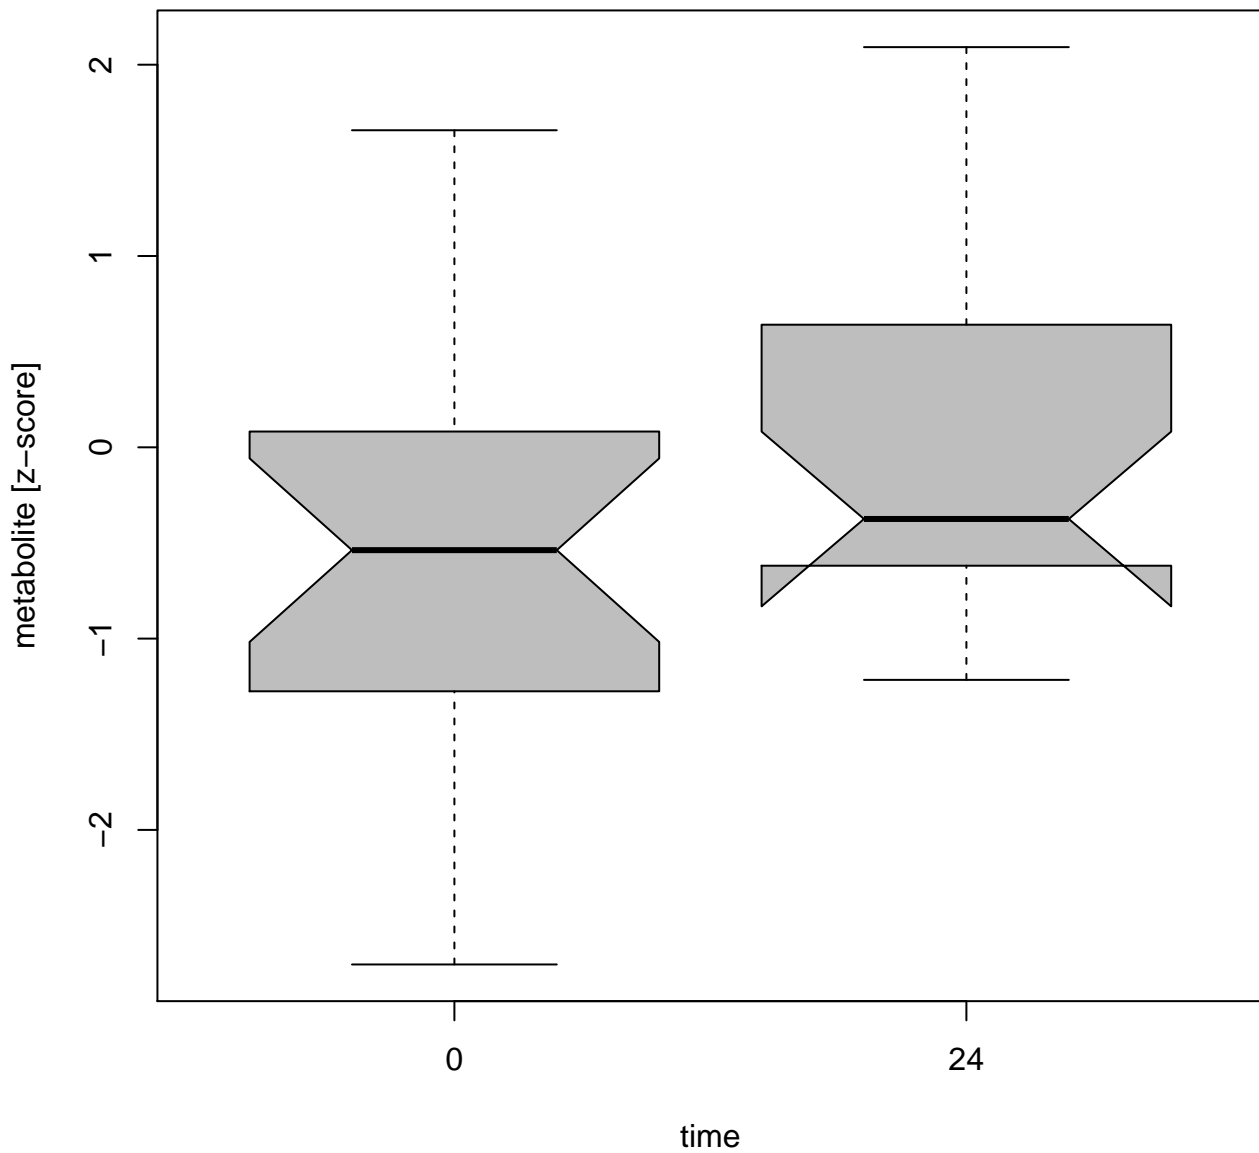

**aspartate**

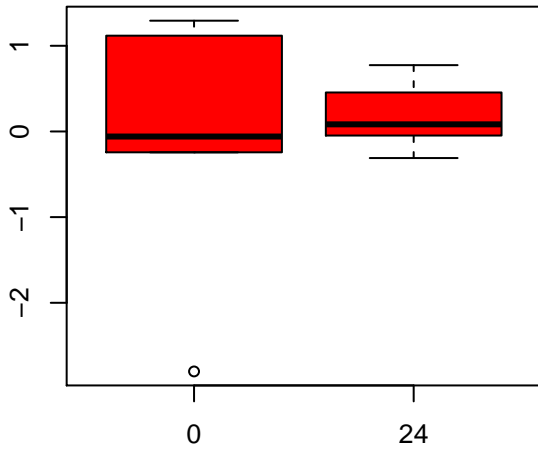

HCT116

**aspartate**

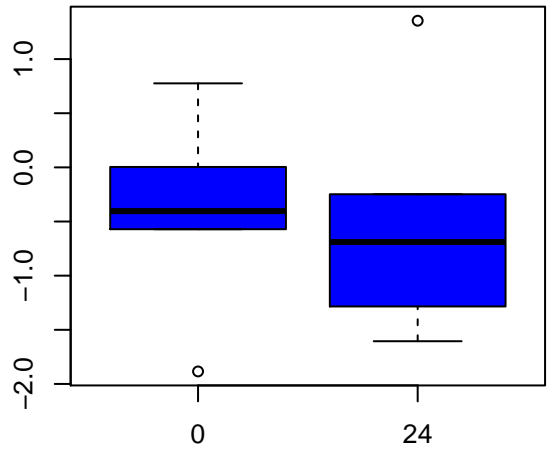

OVCAR

**aspartate**

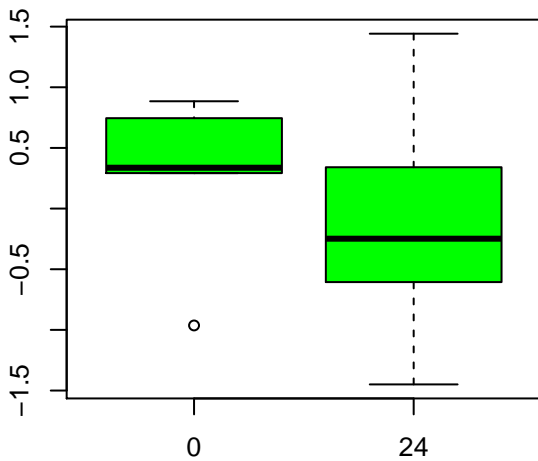

HCT15

**aspartate**

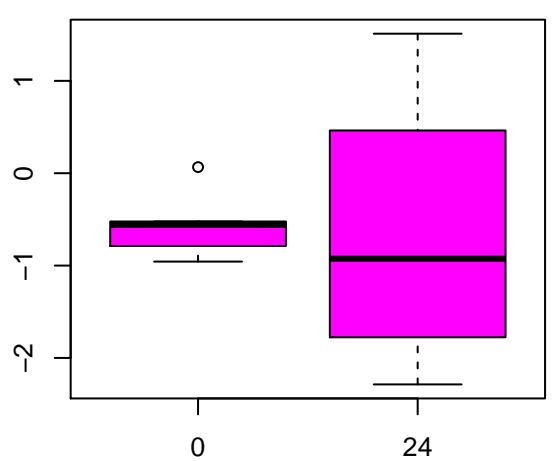

SKOV3

# aspartate

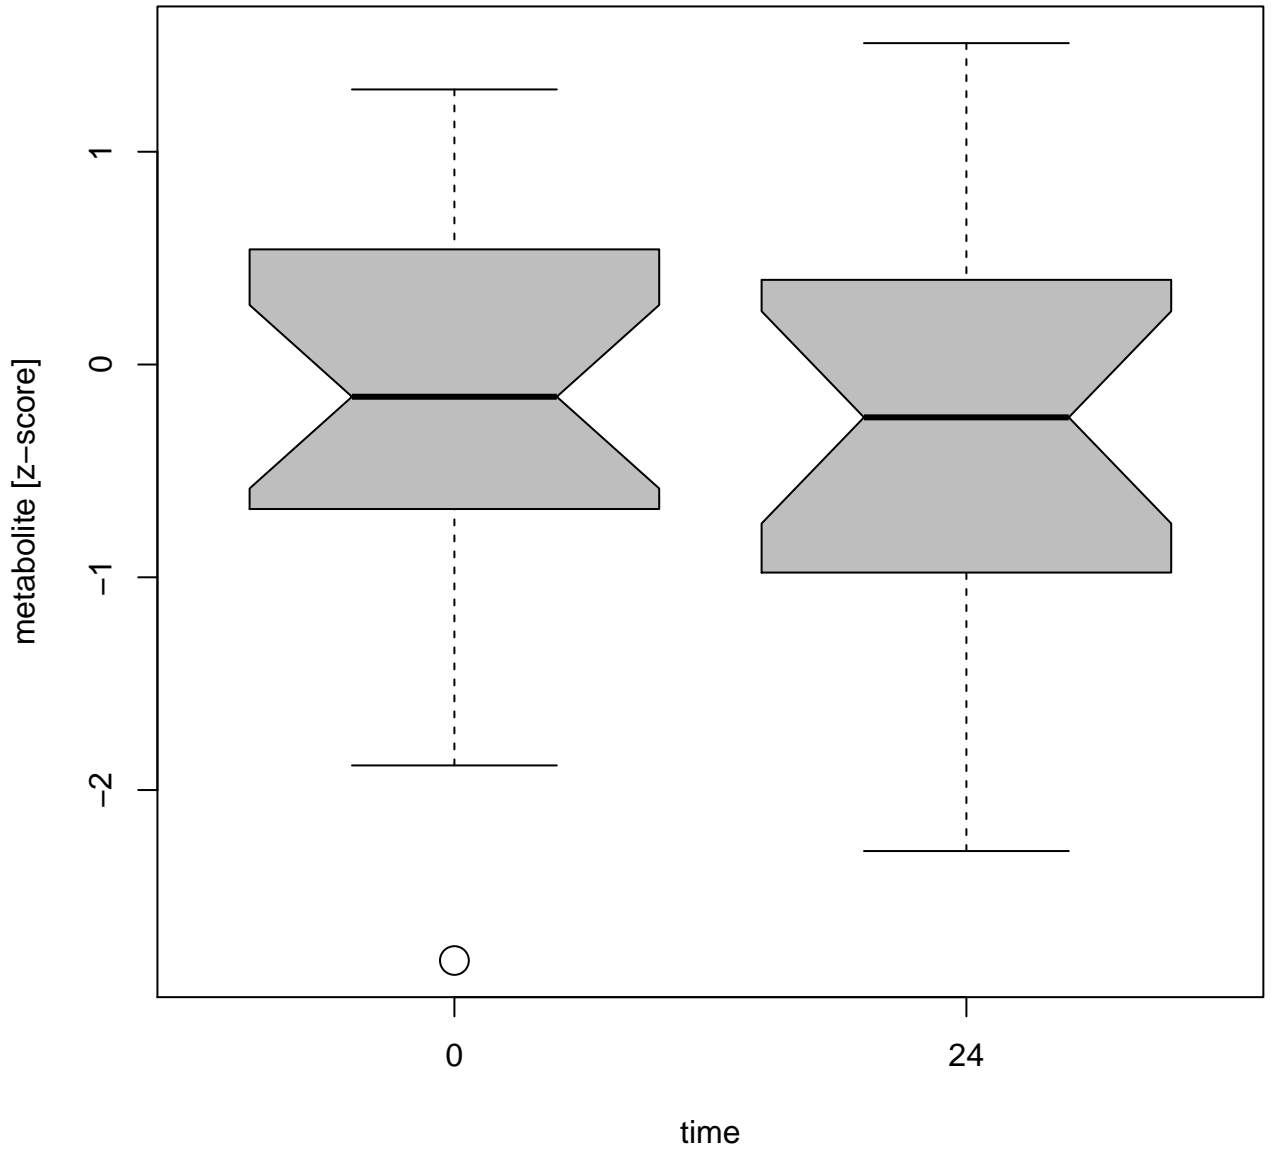

**butyrylcarnitine**

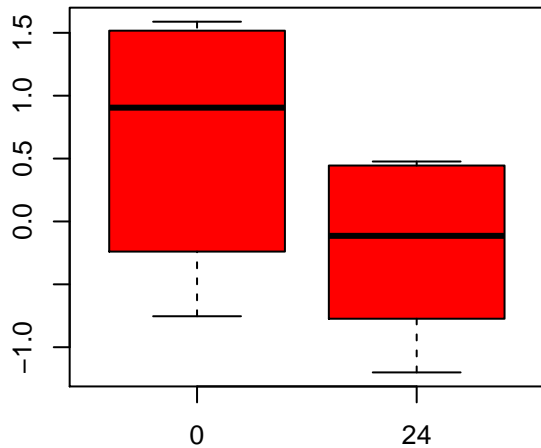

HCT116

**butyrylcarnitine**

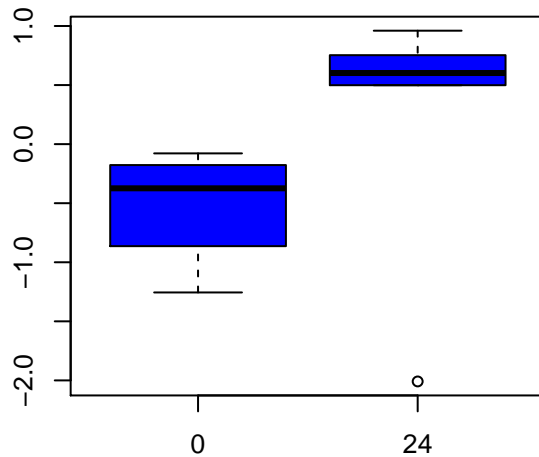

OVCAR

**butyrylcarnitine**

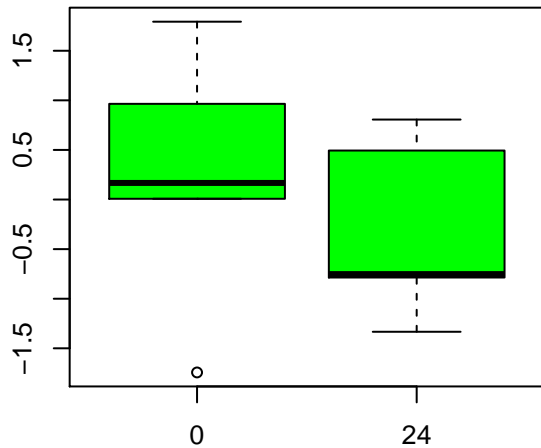

HCT15

**butyrylcarnitine**

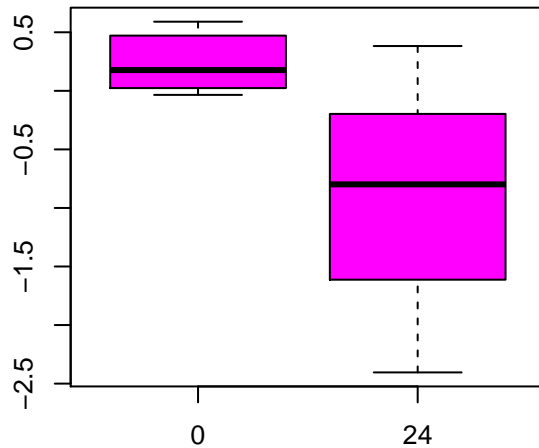

SKOV3

# butyrylcarnitine

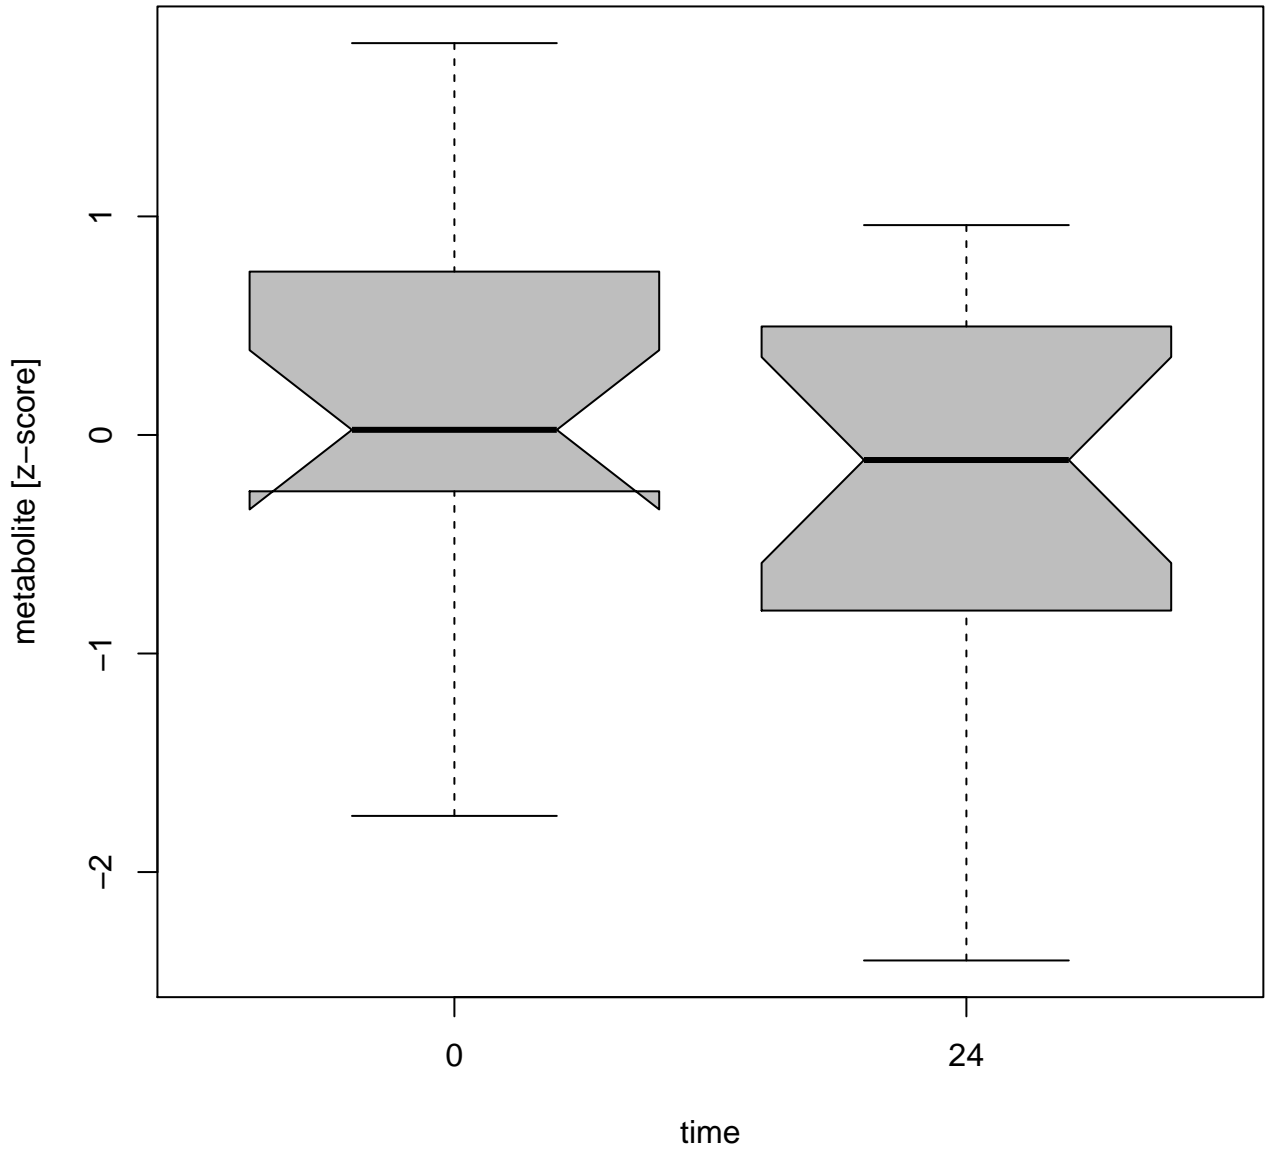

**carnitine**

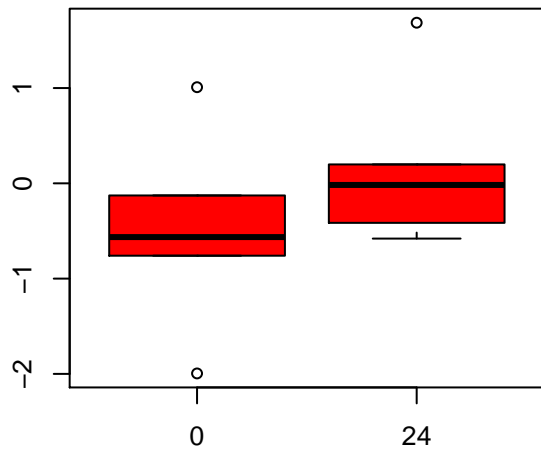

HCT116

**carnitine**

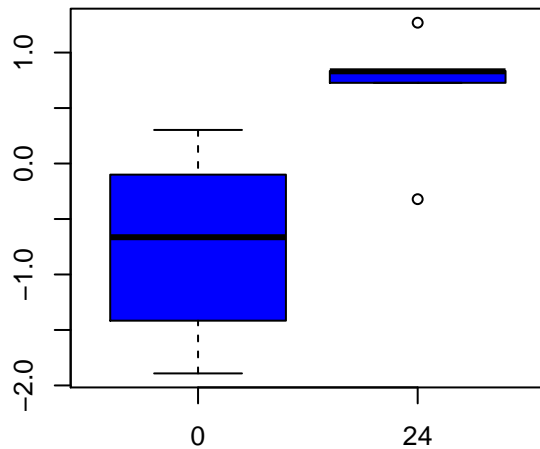

OVCAR

**carnitine**

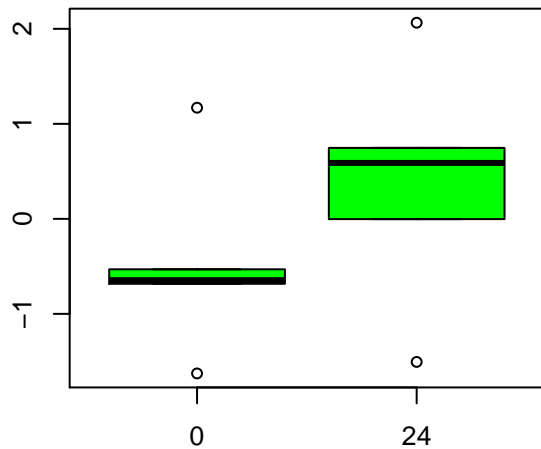

HCT15

**carnitine**

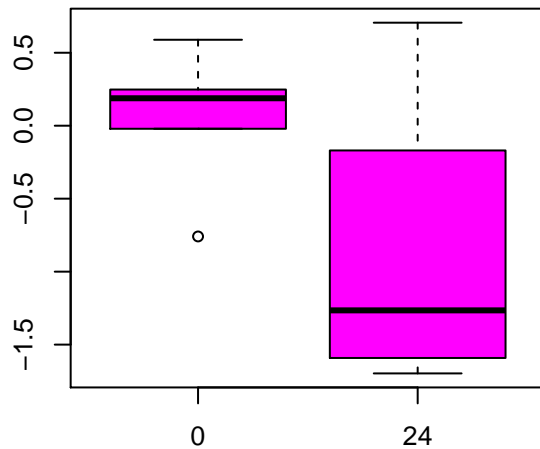

SKOV3

# carnitine

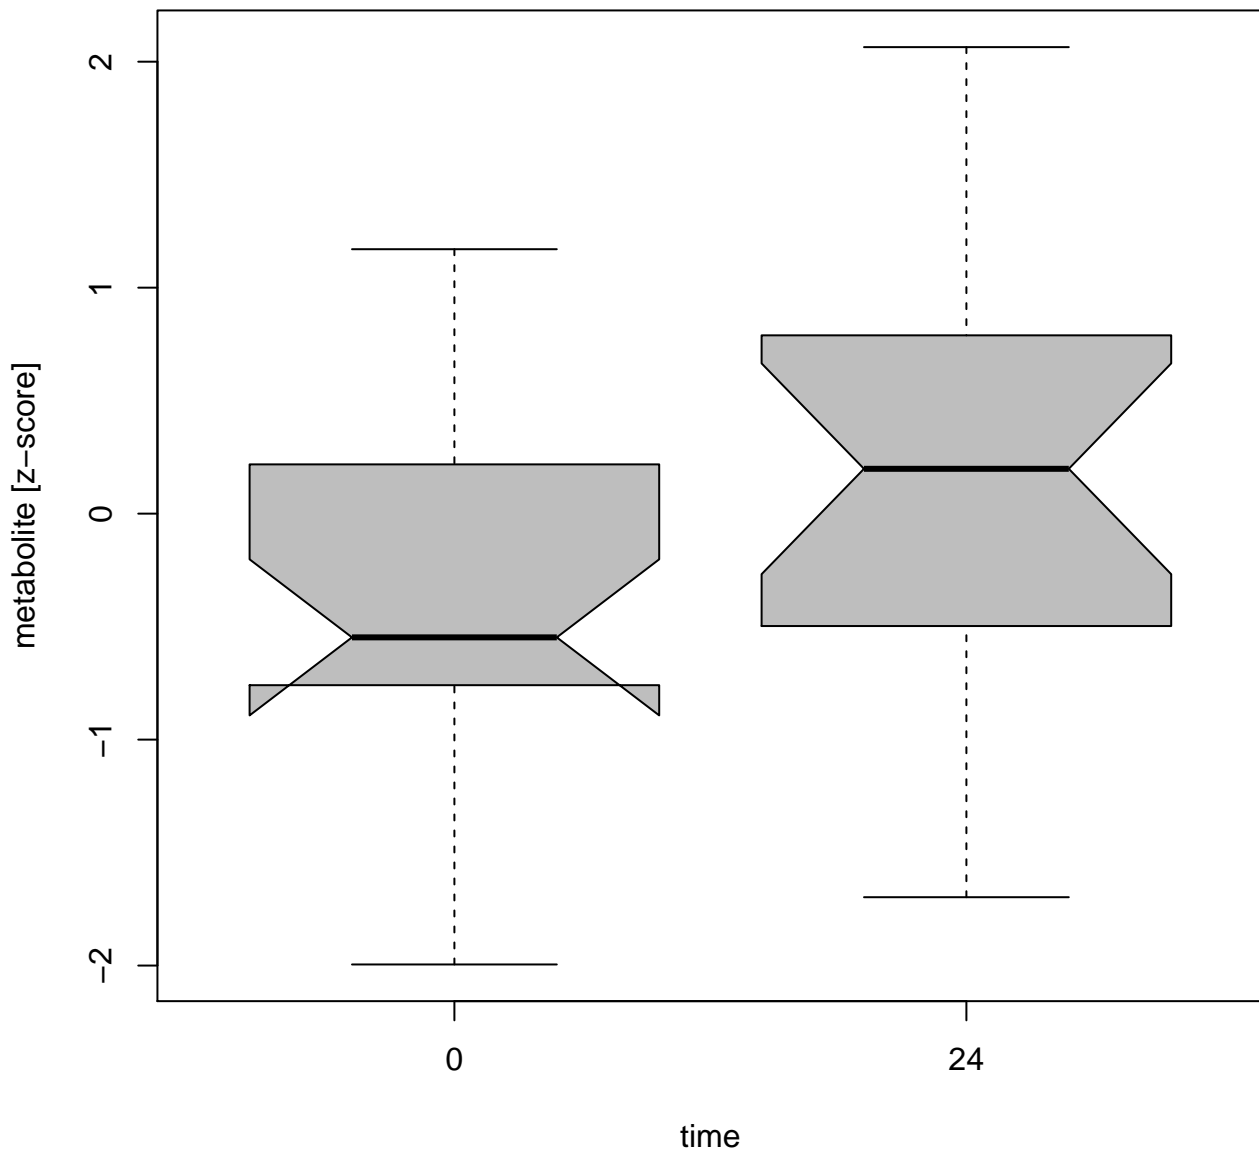

**cholesterol**

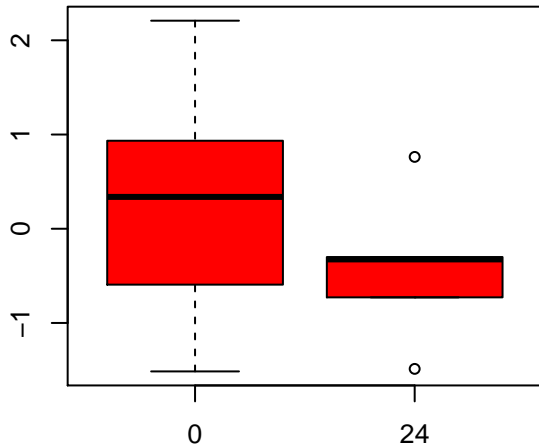

HCT116

**cholesterol**

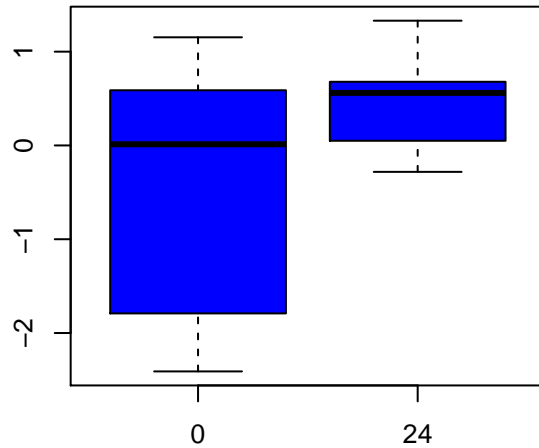

OVCAR

**cholesterol**

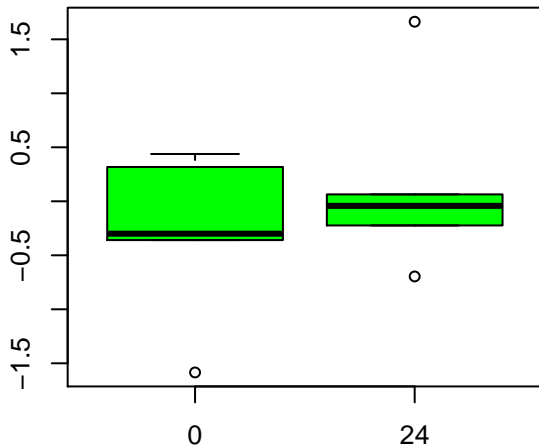

HCT15

**cholesterol**

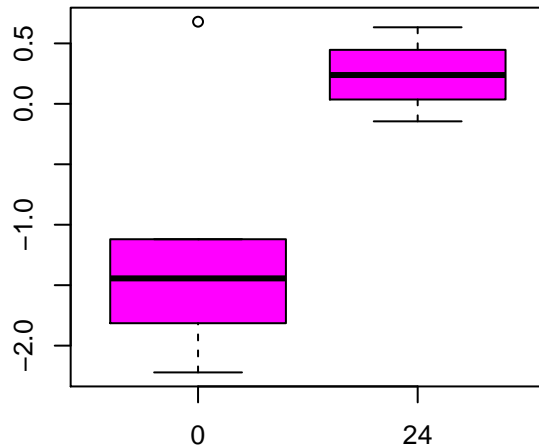

SKOV3



# cholesterol

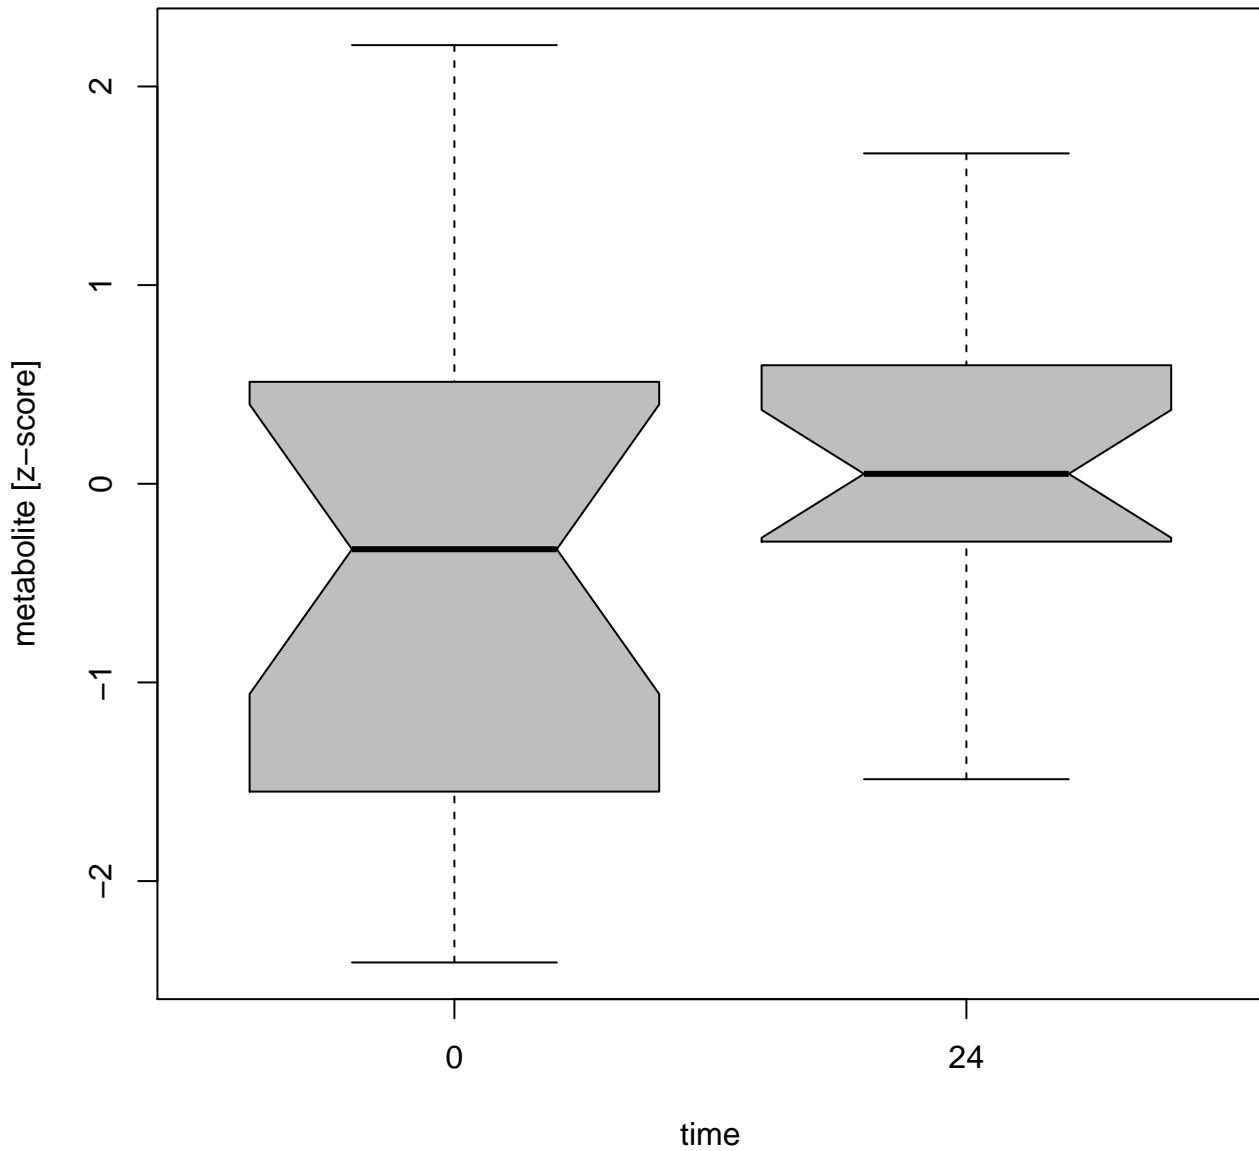

**choline**

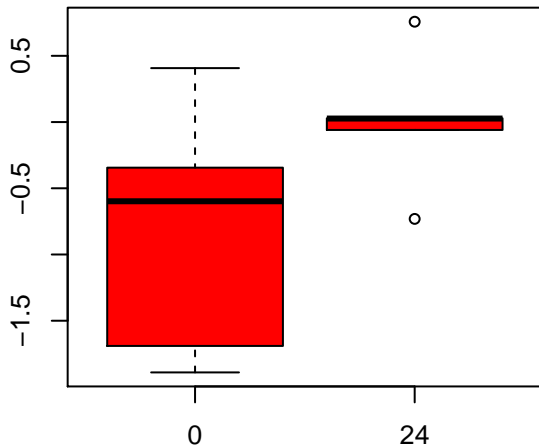

HCT116

**choline**

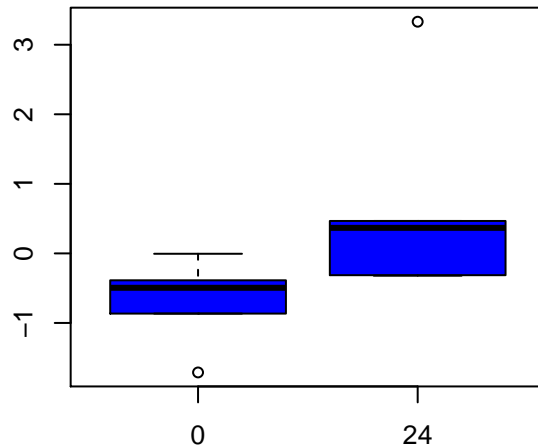

OVCAR

**choline**

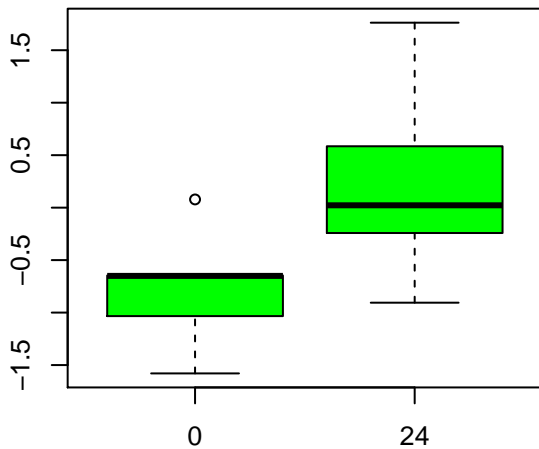

HCT15

**choline**

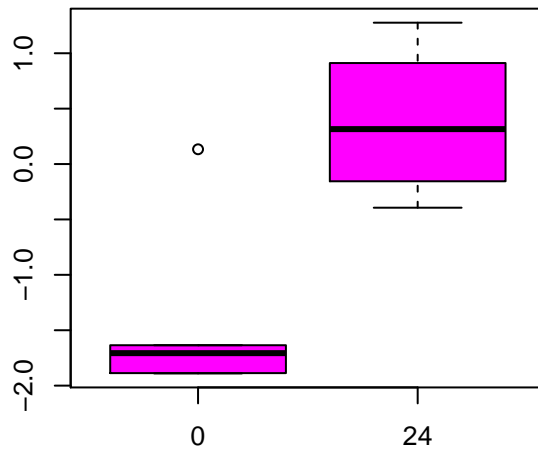

SKOV3

# choline

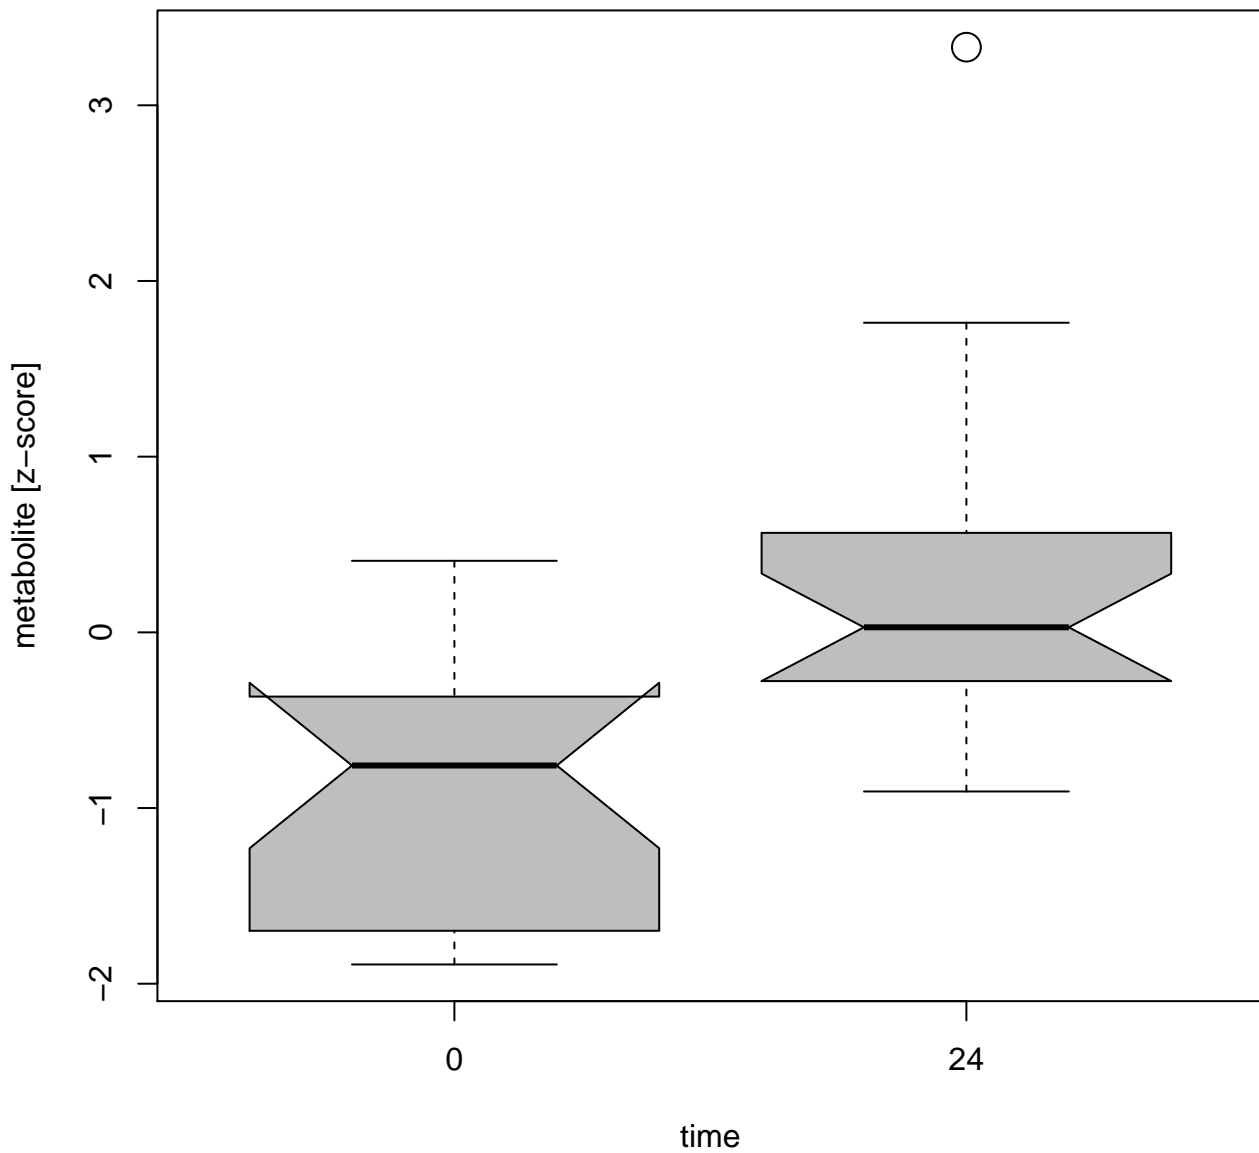

**choline phosphate**

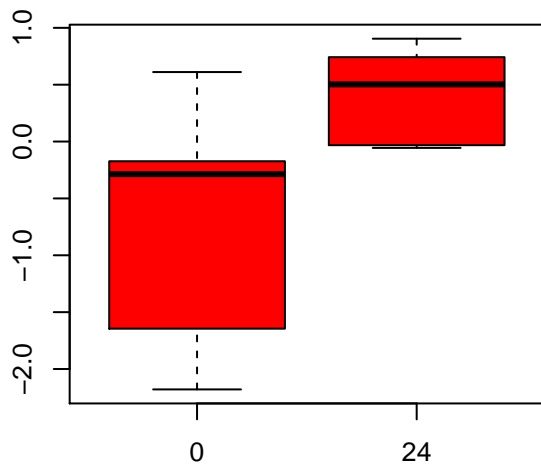

HCT116

**choline phosphate**

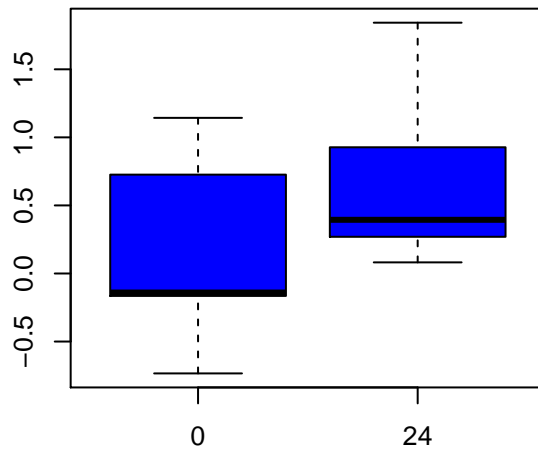

OVCAR

**choline phosphate**

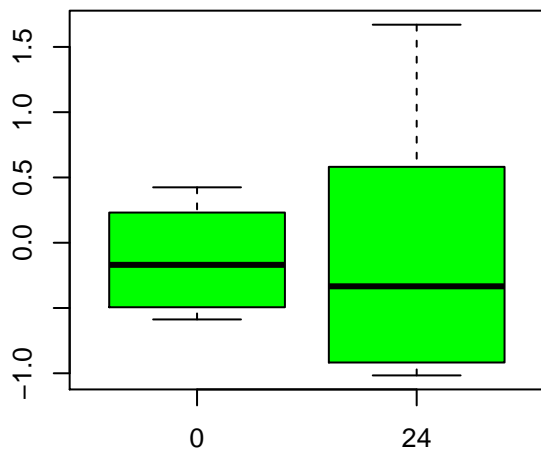

HCT15

**choline phosphate**

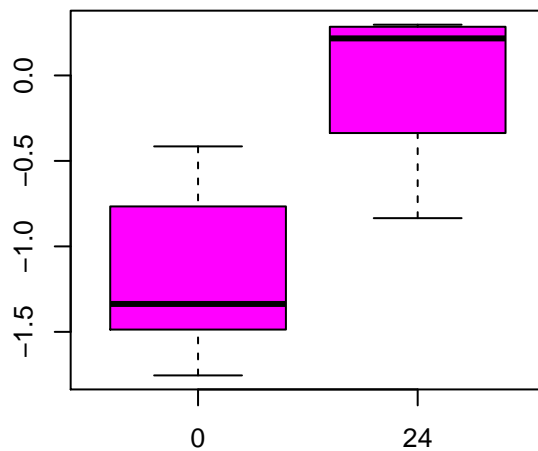

SKOV3

# choline phosphate

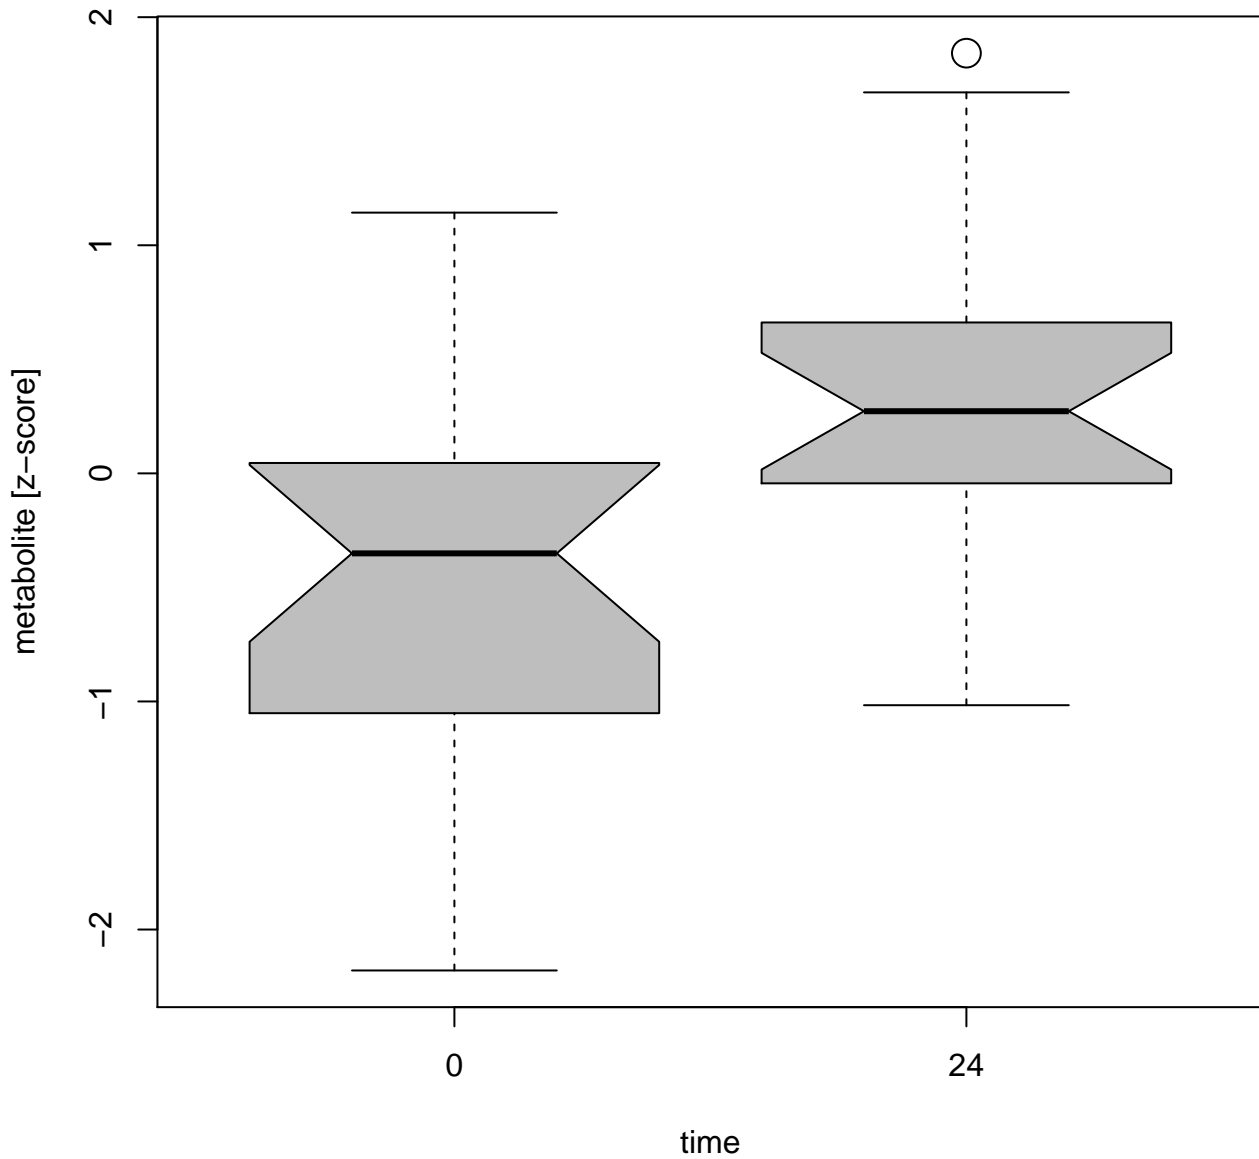

**cis-vaccenate (18:1n7)**

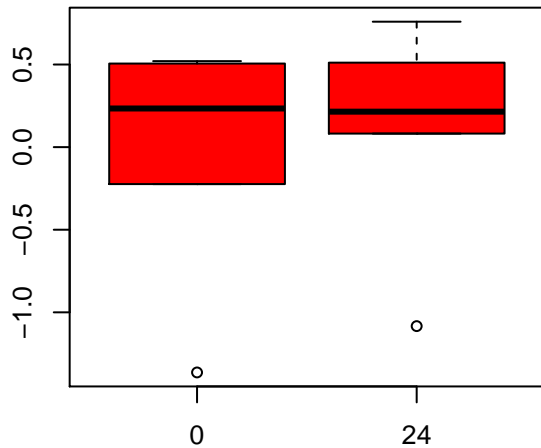

HCT116

**cis-vaccenate (18:1n7)**

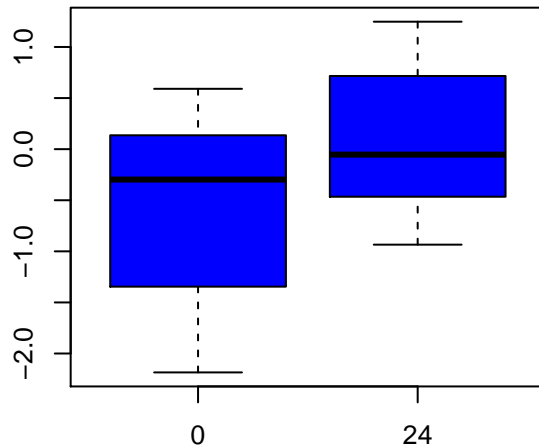

OVCAR

**cis-vaccenate (18:1n7)**

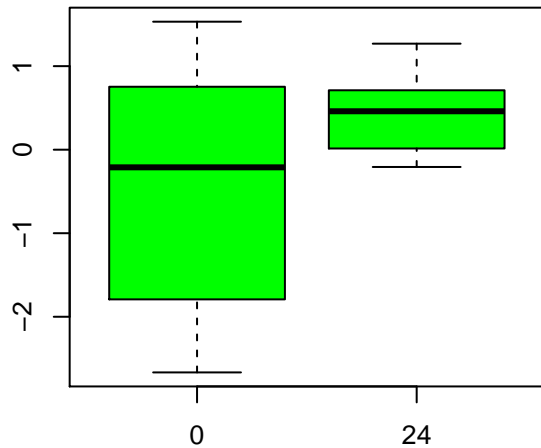

HCT15

**cis-vaccenate (18:1n7)**

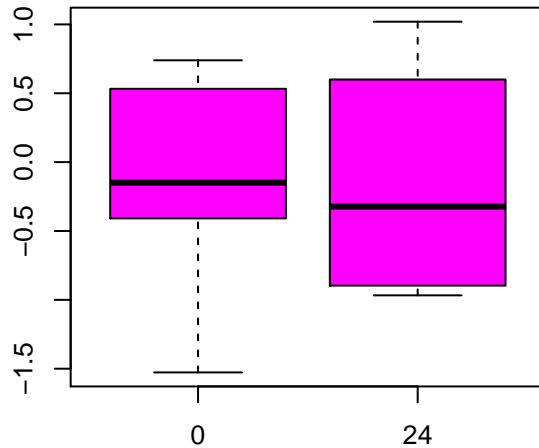

SKOV3

# cis-vaccenate (18:1n7)

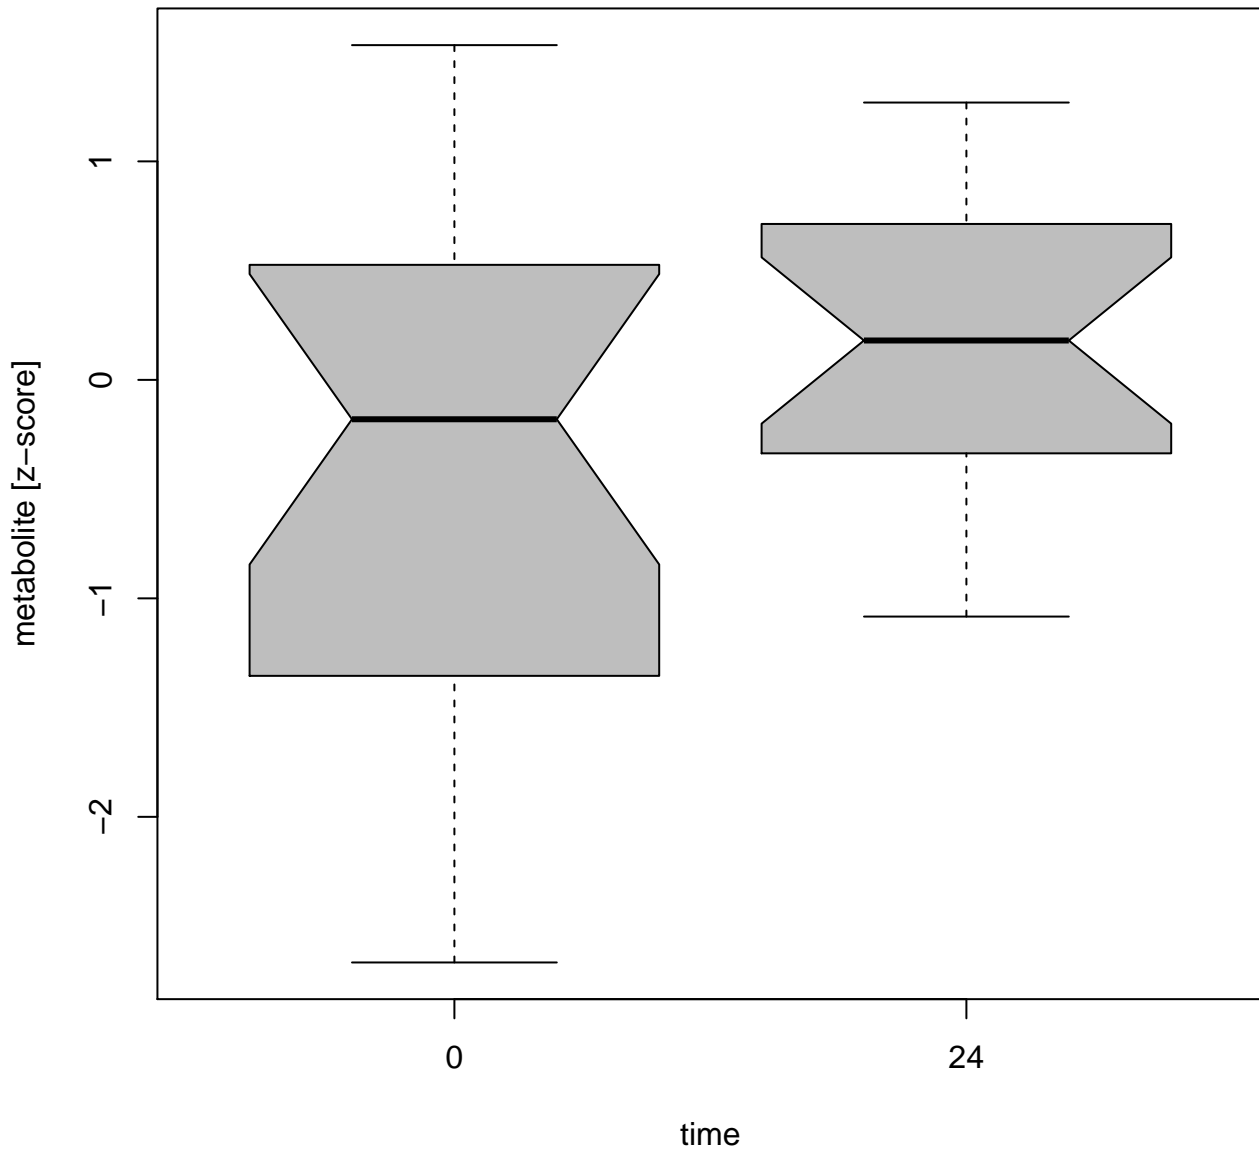

**citrate**

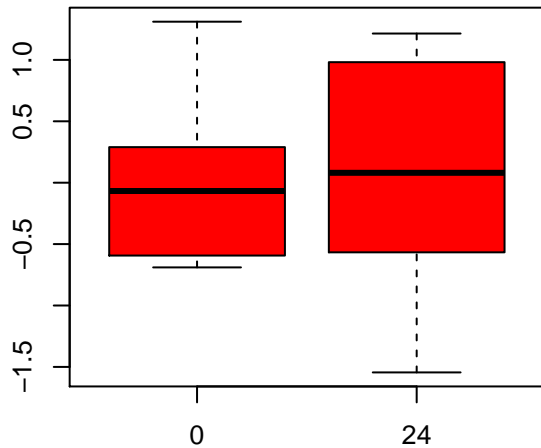

HCT116

**citrate**

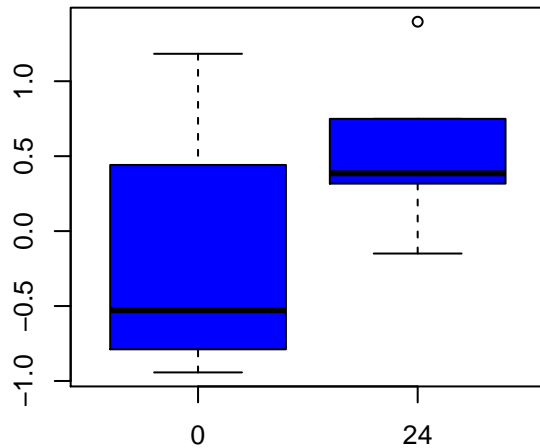

OVCAR

**citrate**

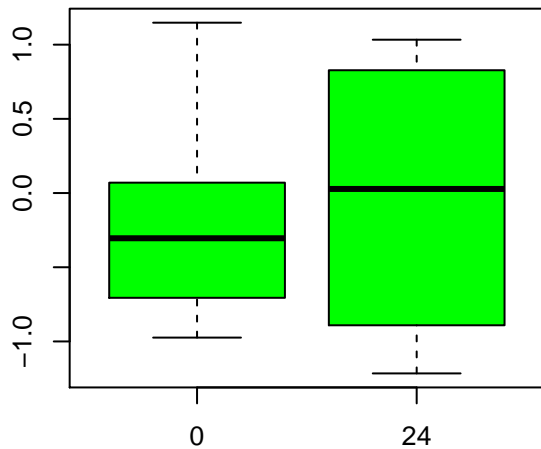

HCT15

**citrate**

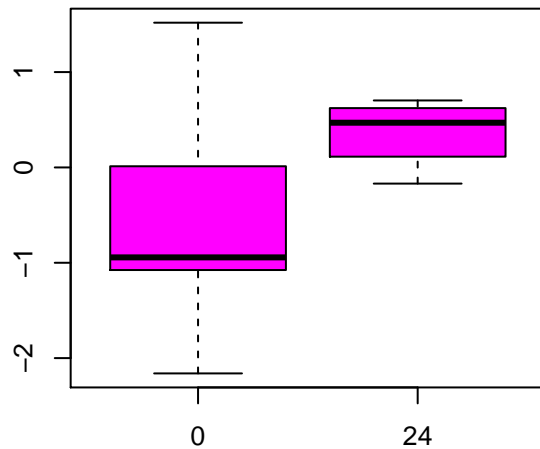

SKOV3



# citrate

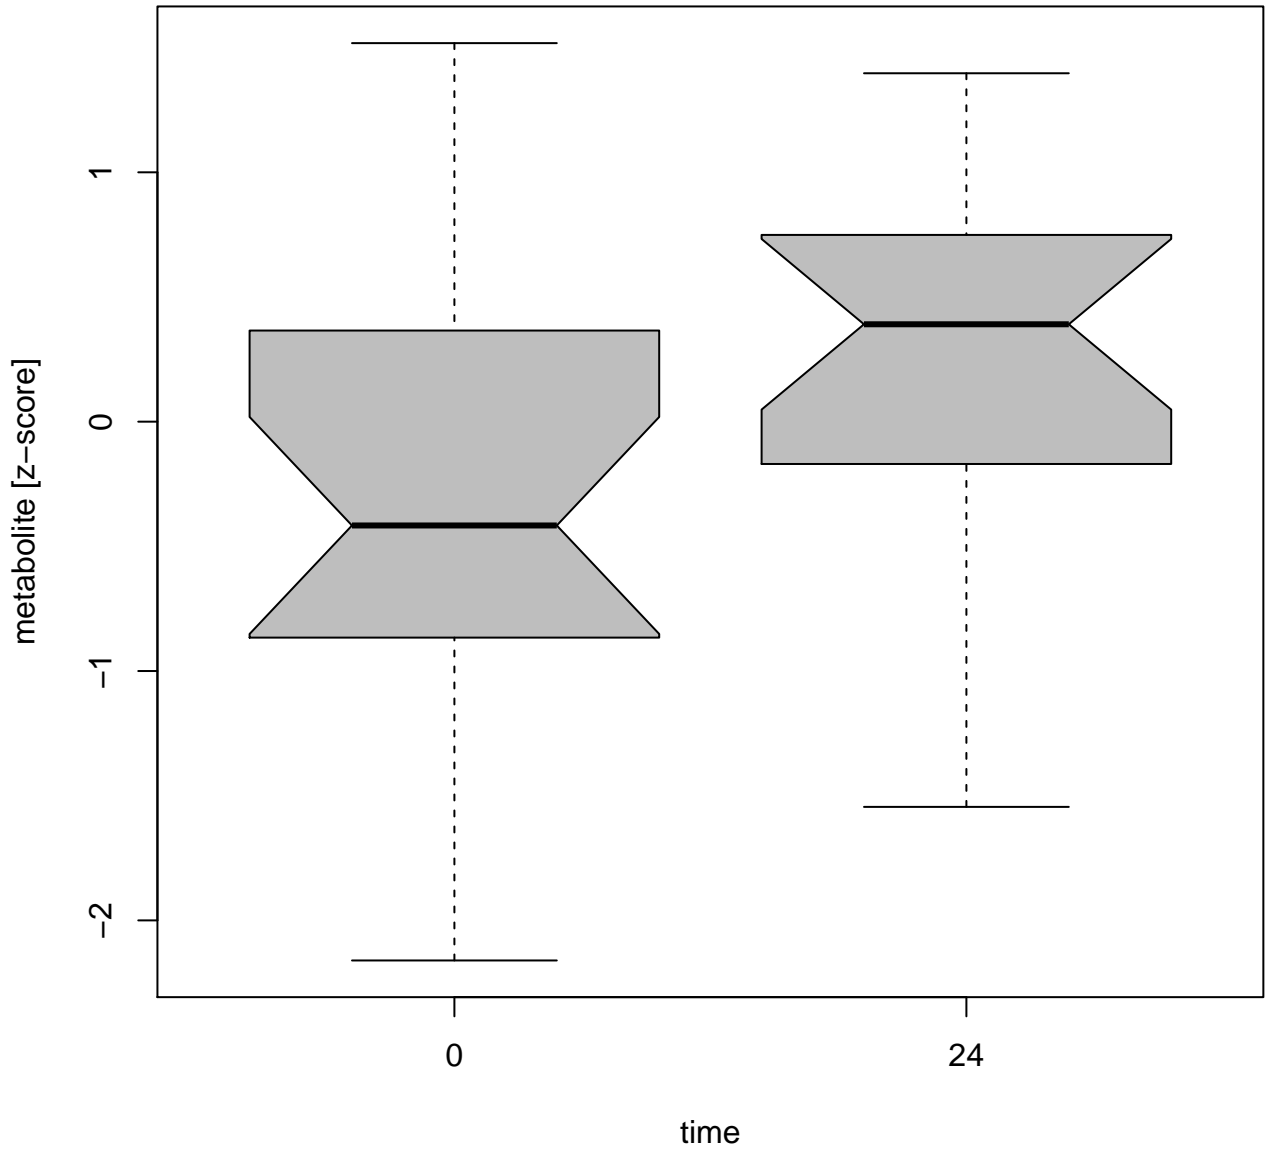

**creatinine**

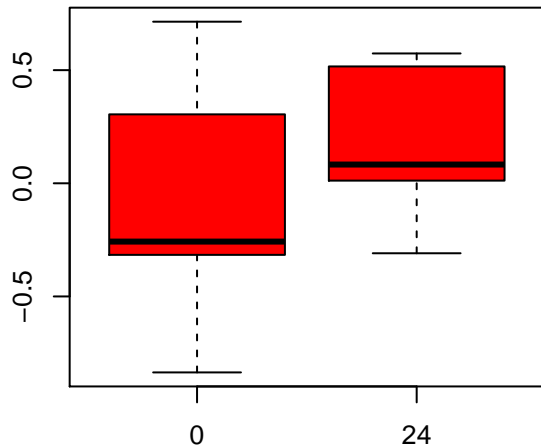

HCT116

**creatinine**

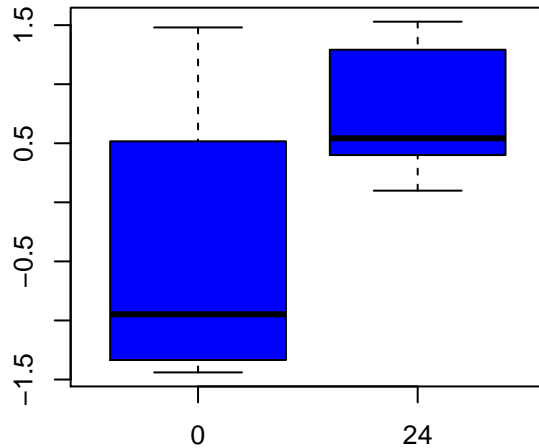

OVCAR

**creatinine**

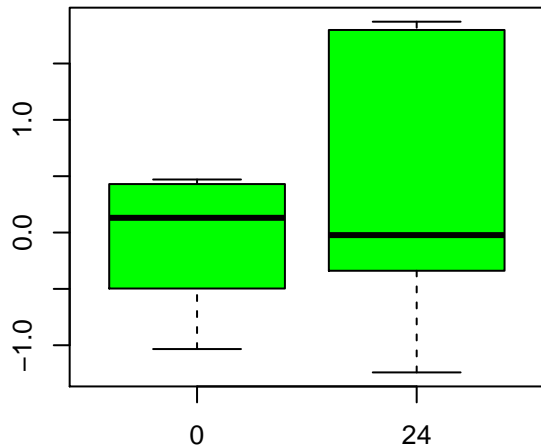

HCT15

**creatinine**

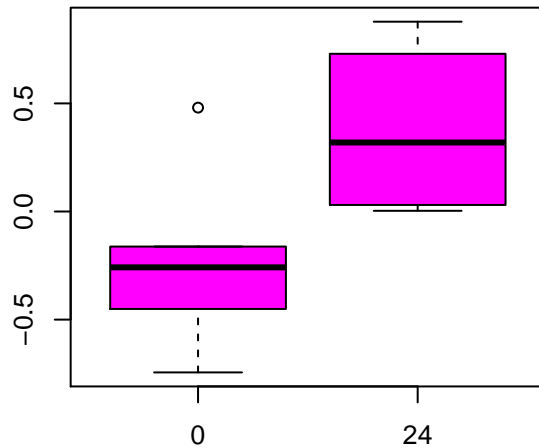

SKOV3

# creatine

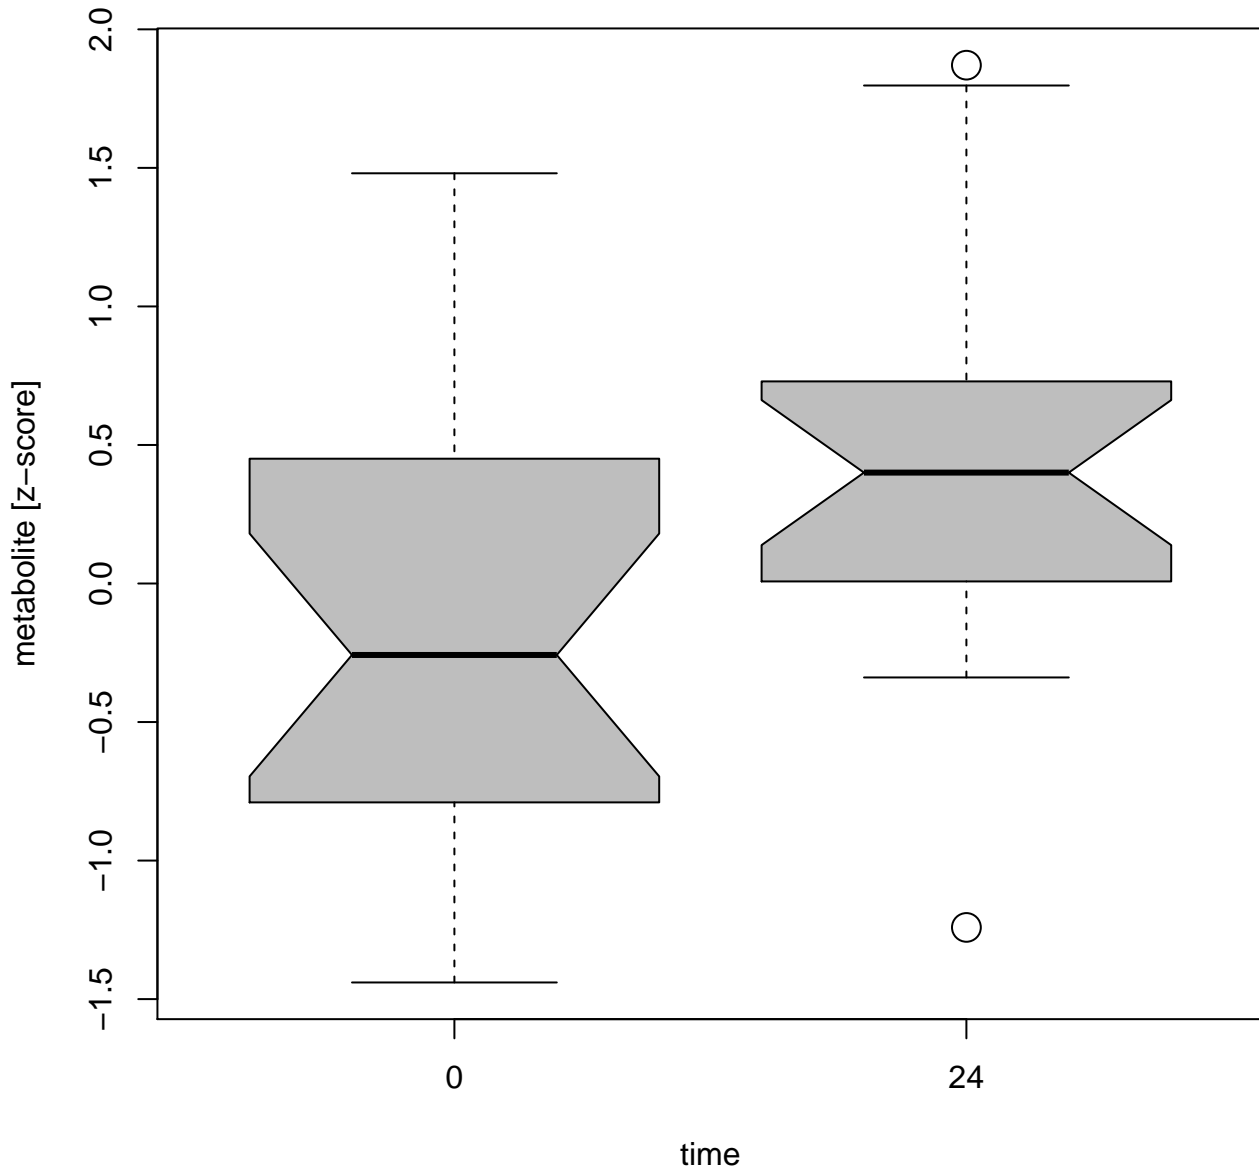

**creatinine**

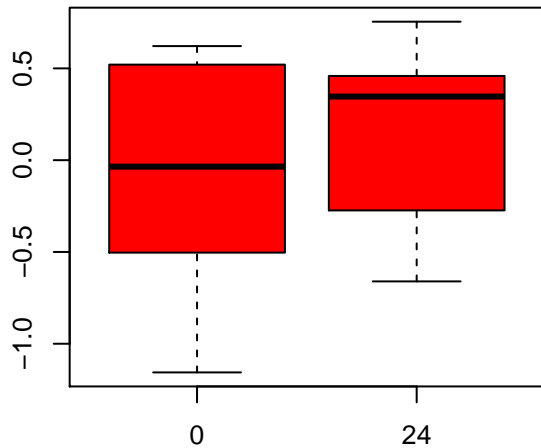

HCT116

**creatinine**

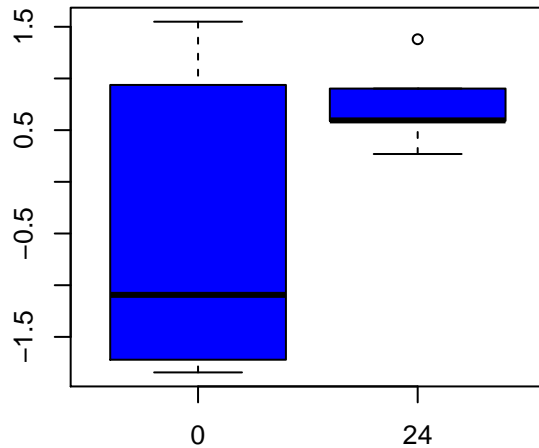

OVCAR

**creatinine**

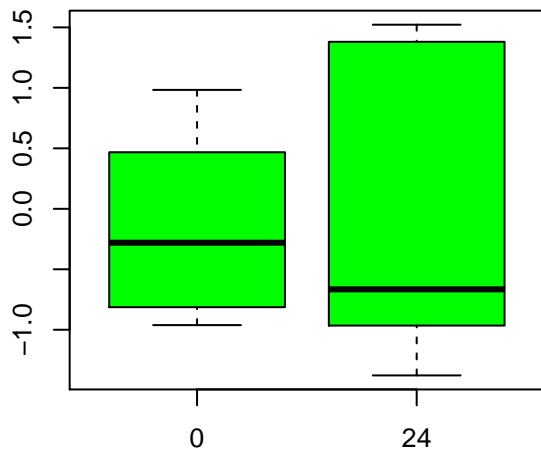

HCT15

**creatinine**

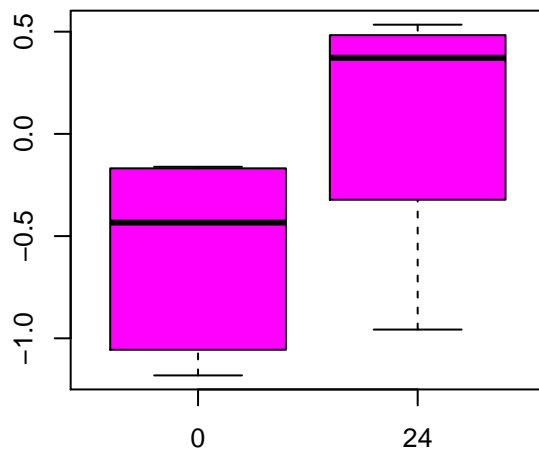

SKOV3

# creatinine

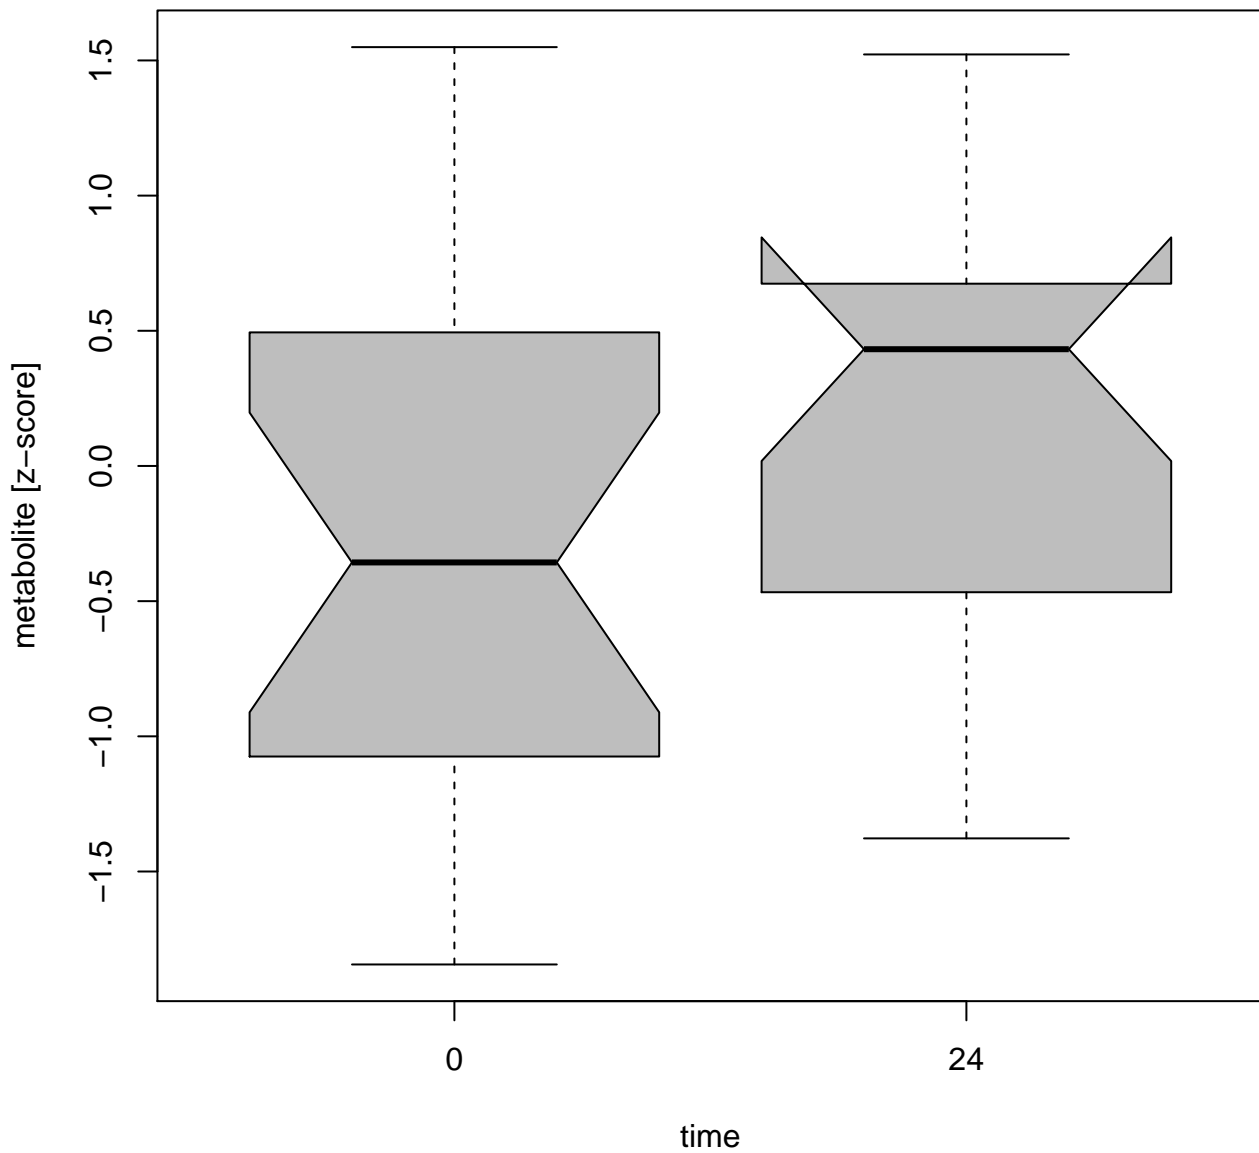

**cysteinyglycine**

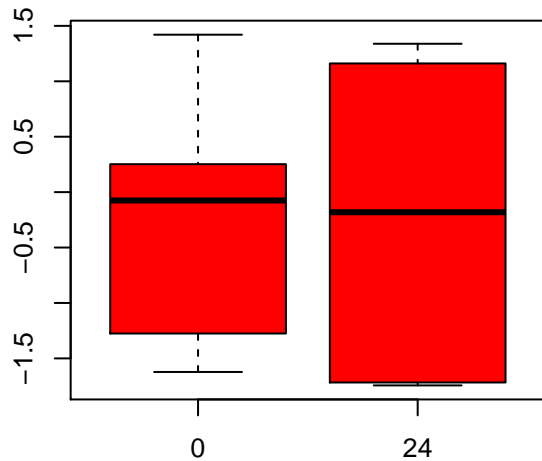

HCT116

**cysteinyglycine**

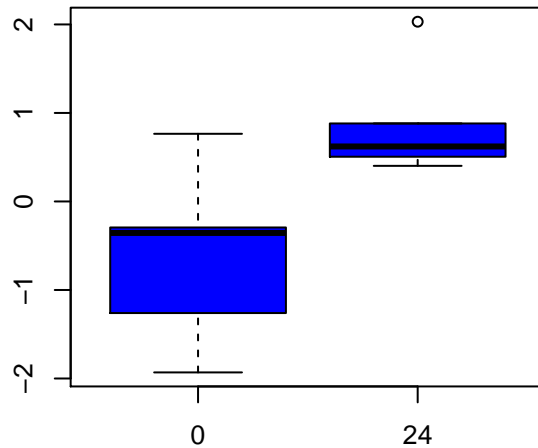

OVCAR

**cysteinyglycine**

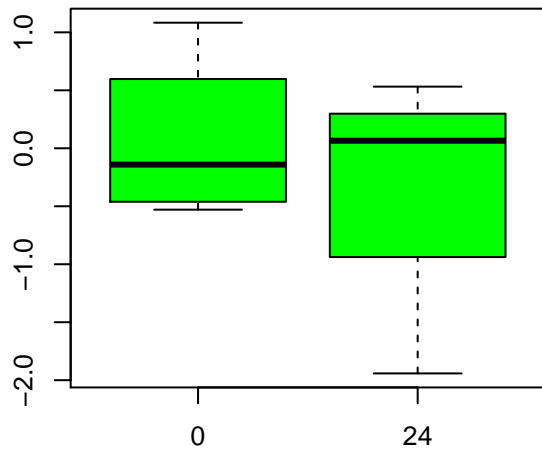

HCT15

**cysteinyglycine**

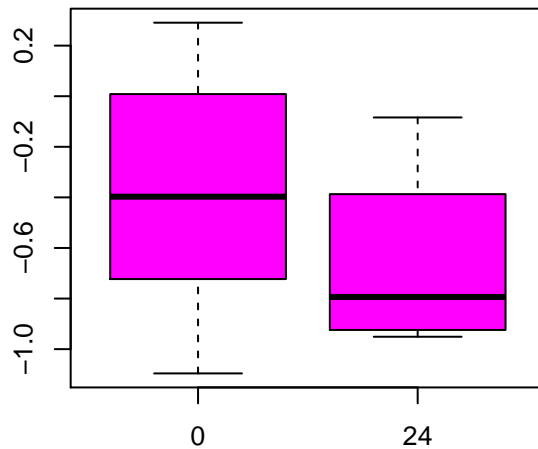

SKOV3

# cysteinylglycine

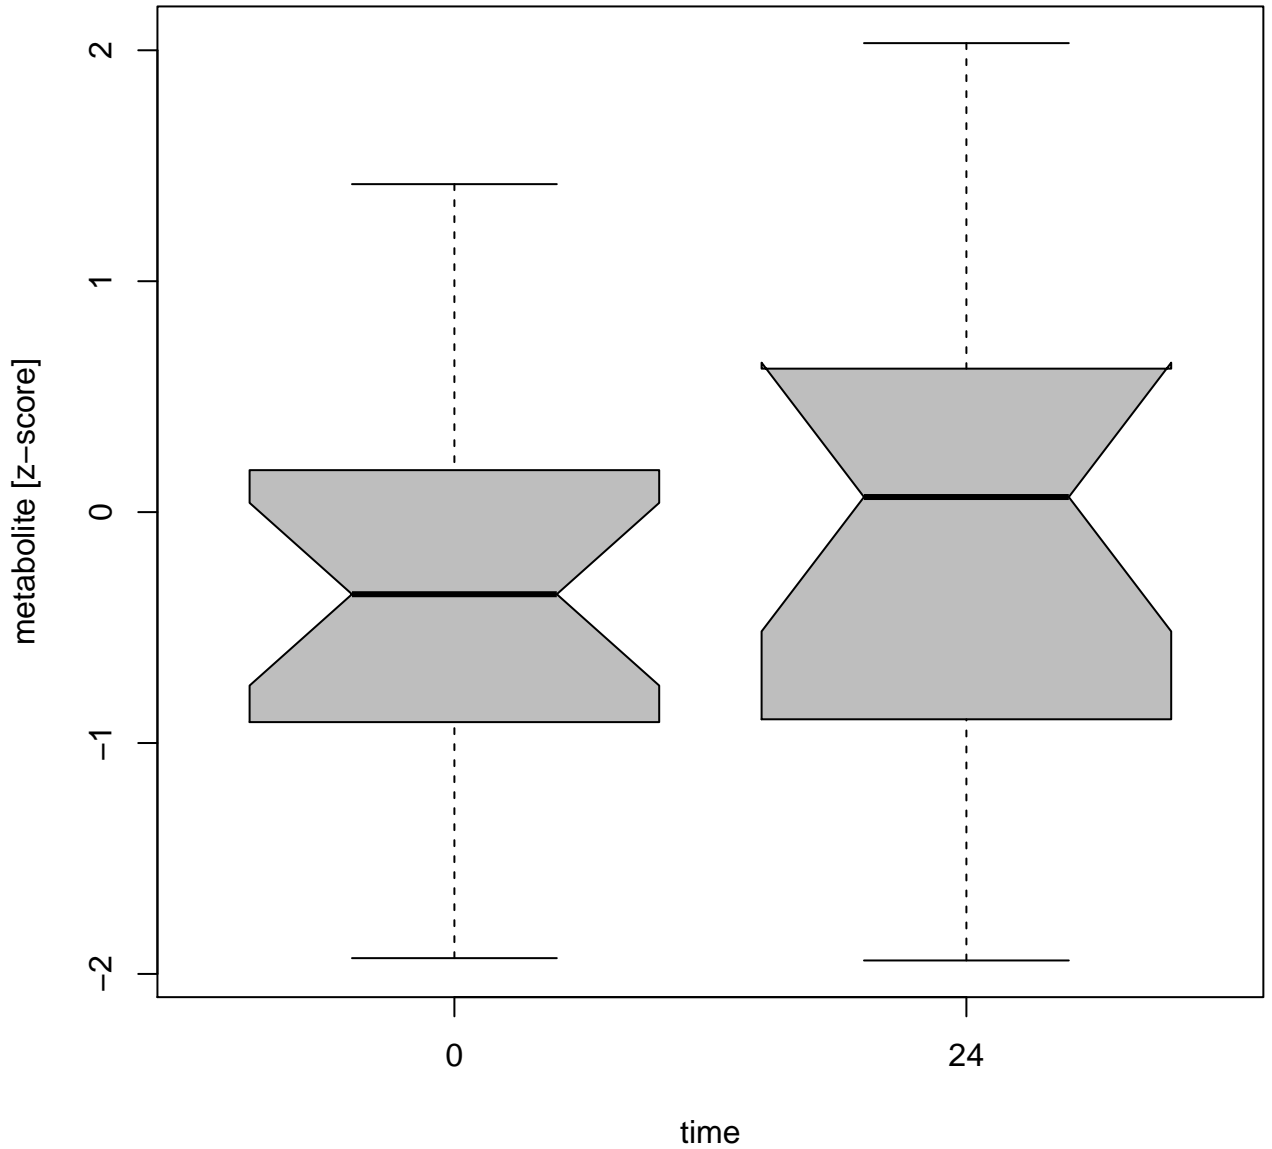

**cytidine 5'-diphosphocholine**

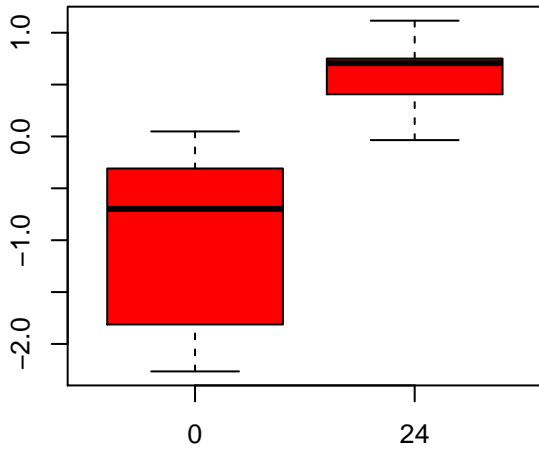

HCT116

**cytidine 5'-diphosphocholine**

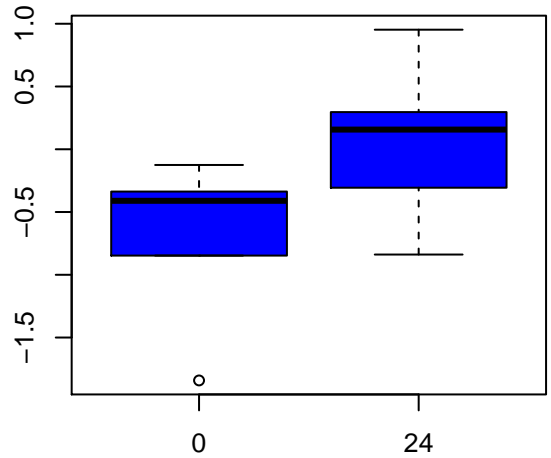

OVCAR

**cytidine 5'-diphosphocholine**

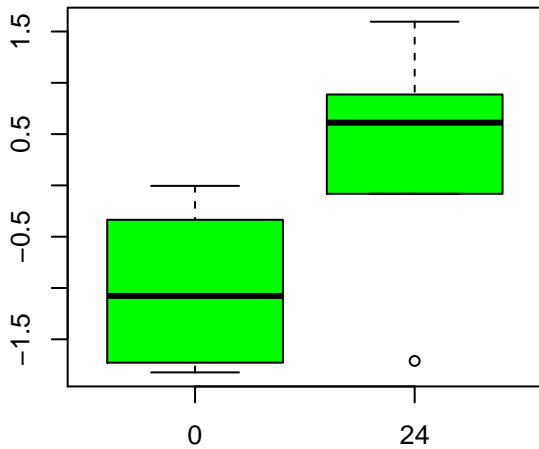

HCT15

**cytidine 5'-diphosphocholine**

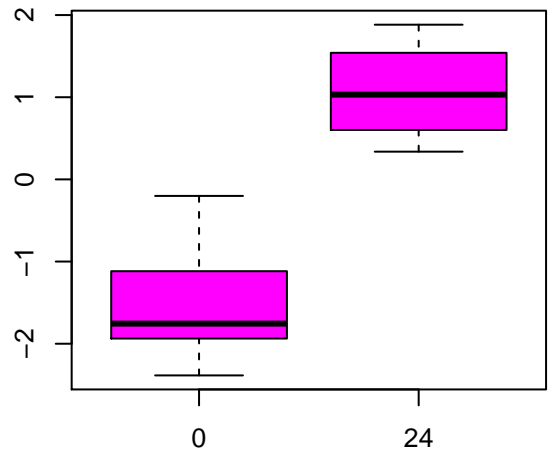

SKOV3



# cytidine 5'-diphosphocholine

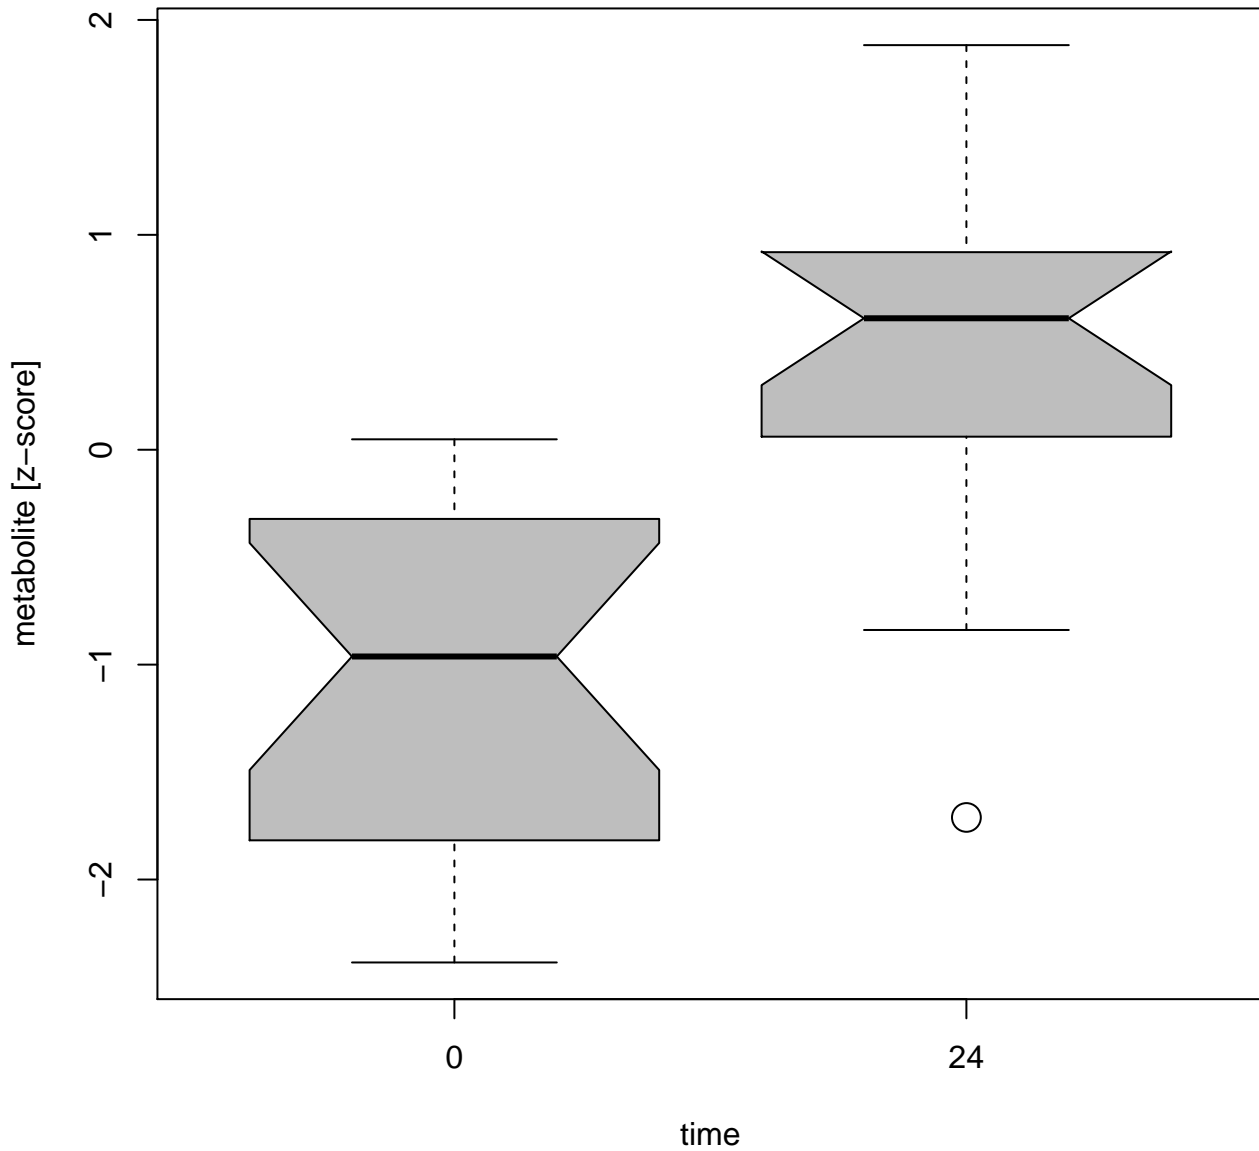

**cytidine 5'-monophosphate (5'-CMP)**

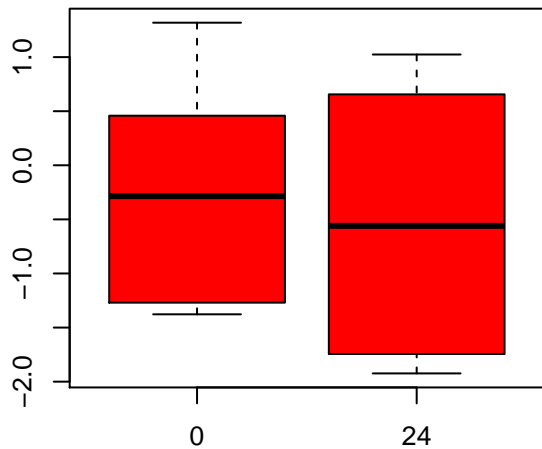

HCT116

**cytidine 5'-monophosphate (5'-CMP)**

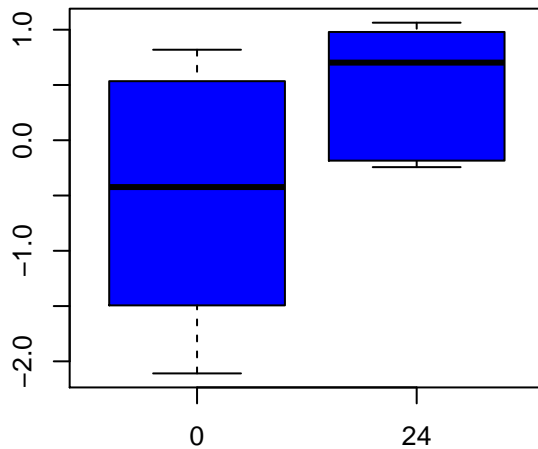

OVCAR

**cytidine 5'-monophosphate (5'-CMP)**

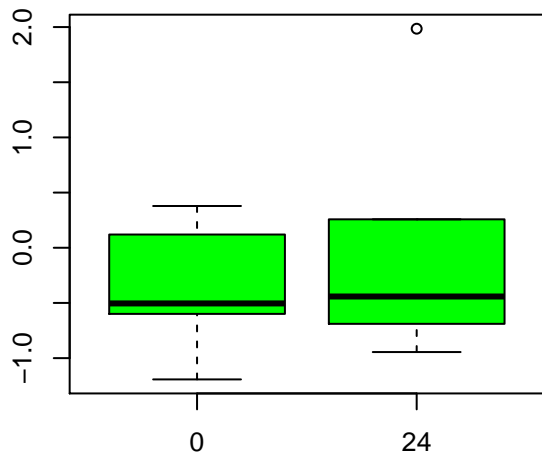

HCT15

**cytidine 5'-monophosphate (5'-CMP)**

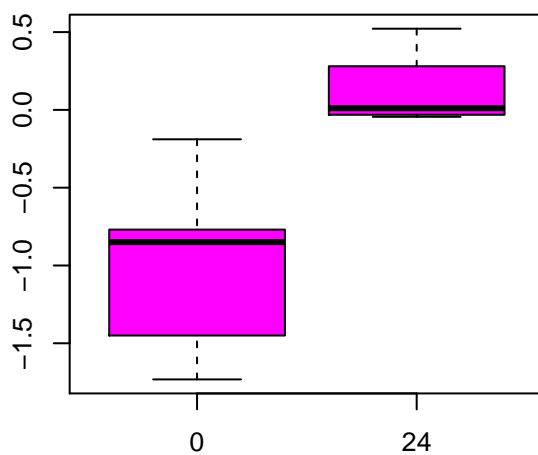

SKOV3

# cytidine 5'-monophosphate (5'-CMP)

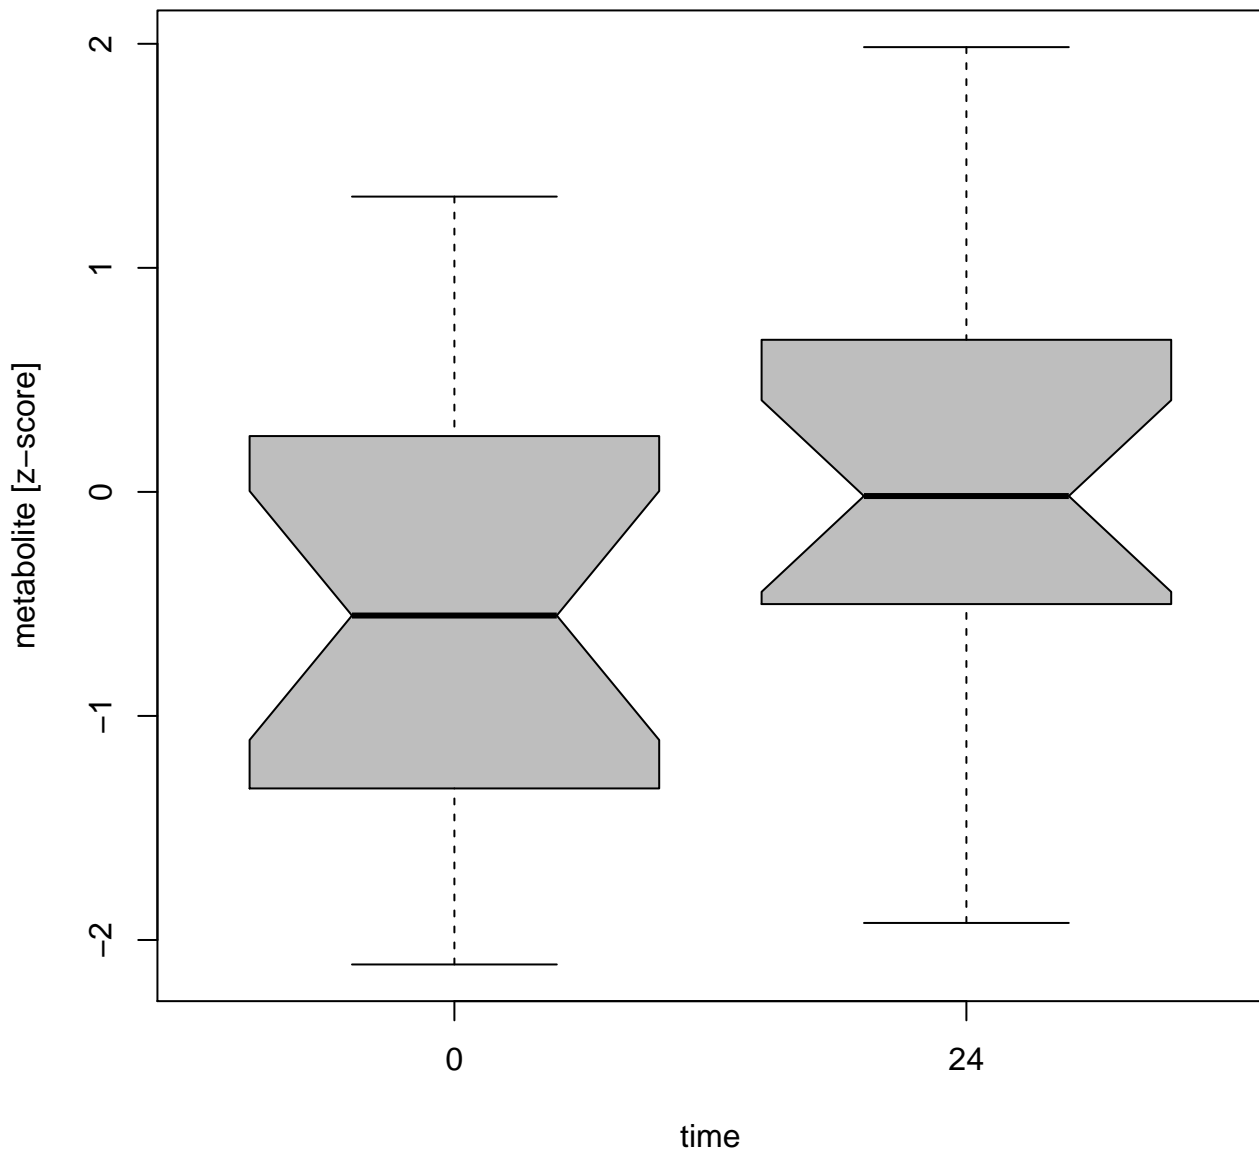

**cytidine diphosphate**

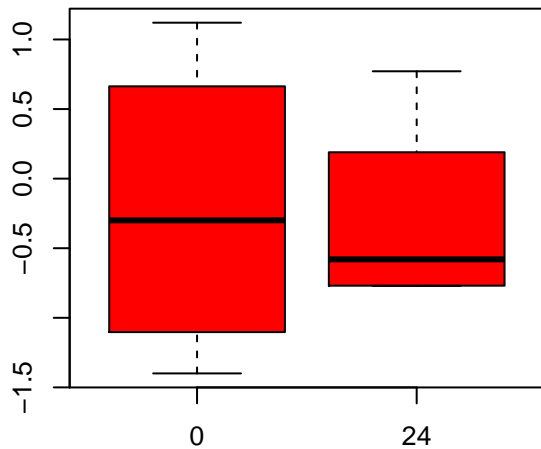

HCT116

**cytidine diphosphate**

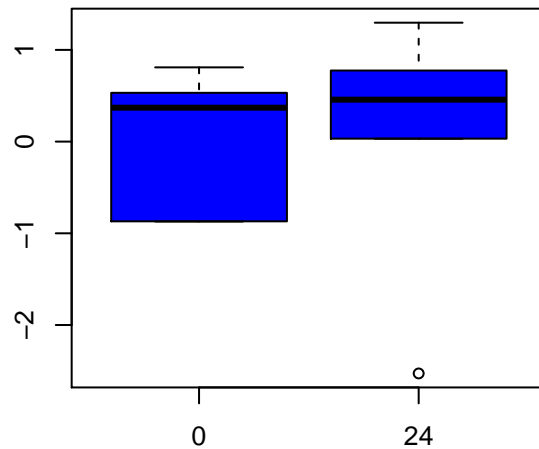

OVCAR

**cytidine diphosphate**

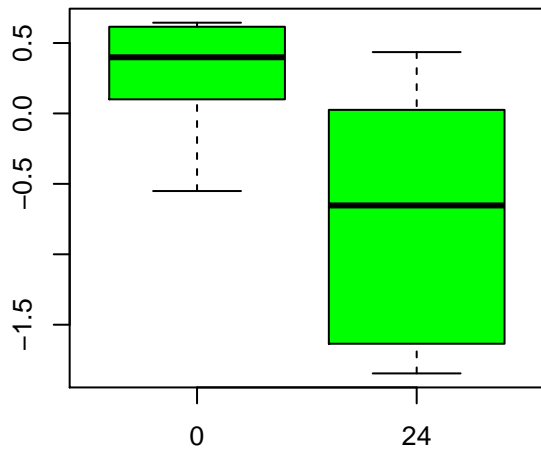

HCT15

**cytidine diphosphate**

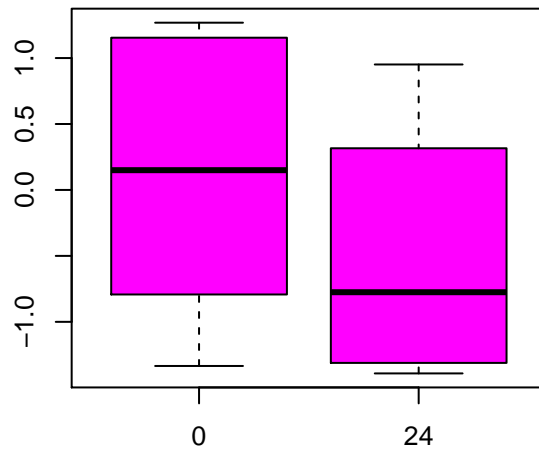

SKOV3

# cytidine diphosphate

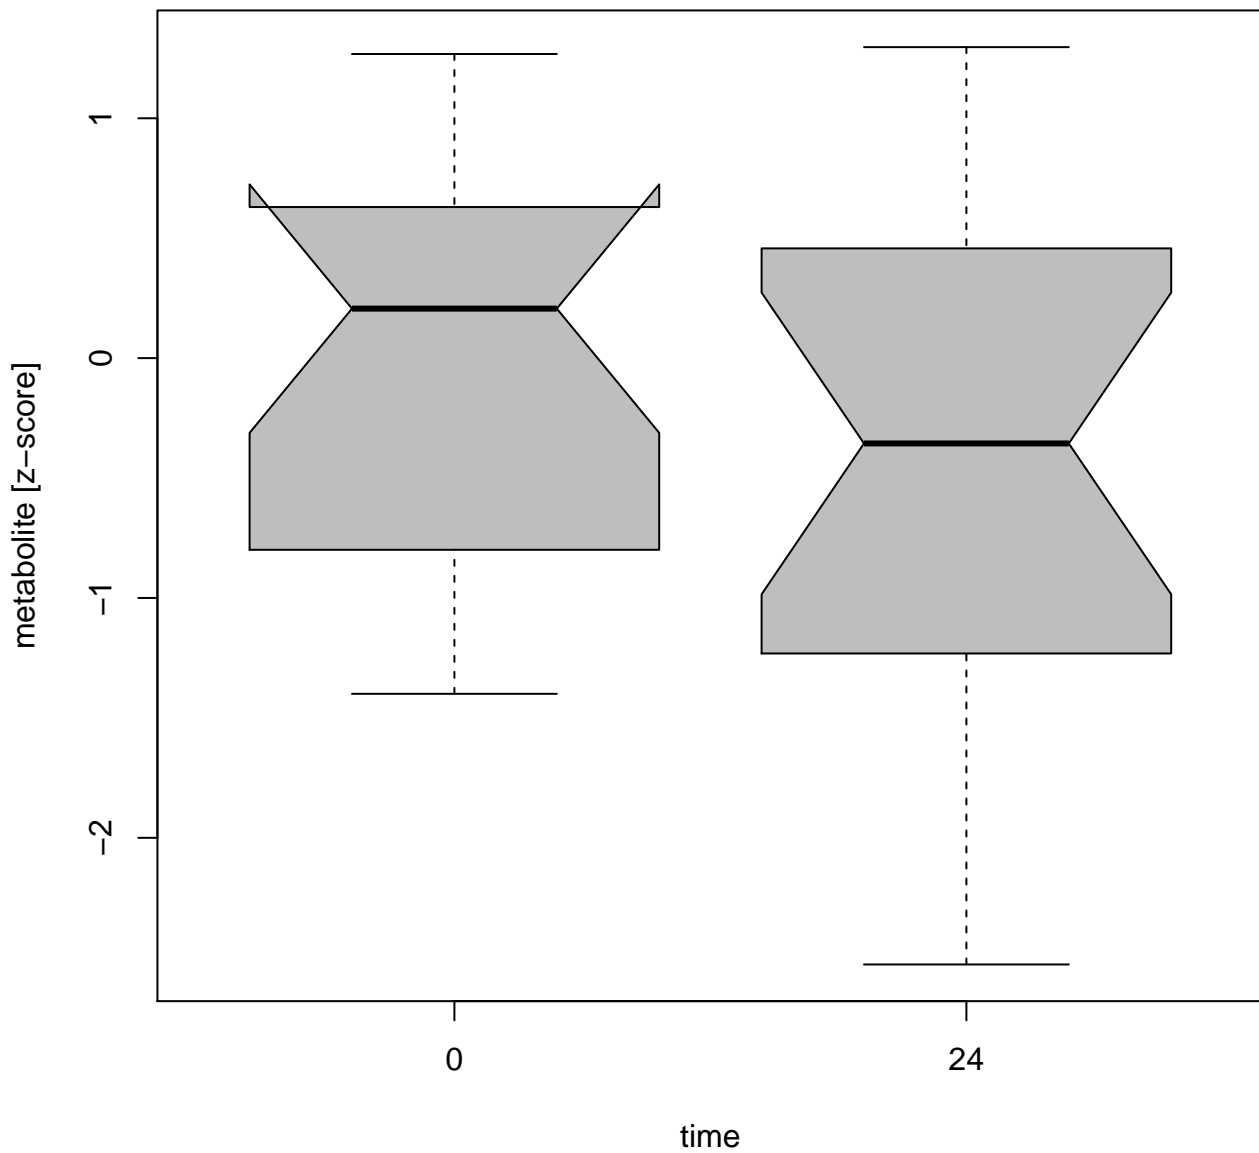

**cytidine-5'-diphosphoethanolamine**

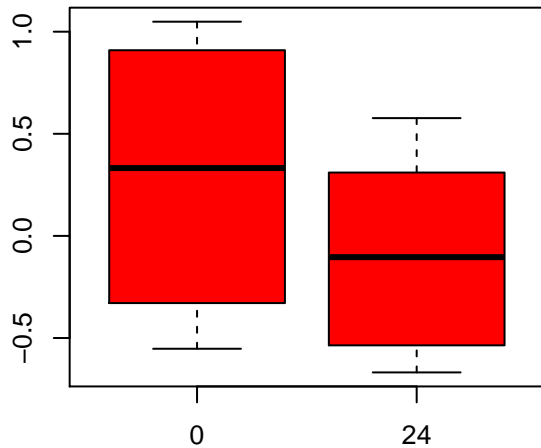

HCT116

**cytidine-5'-diphosphoethanolamine**

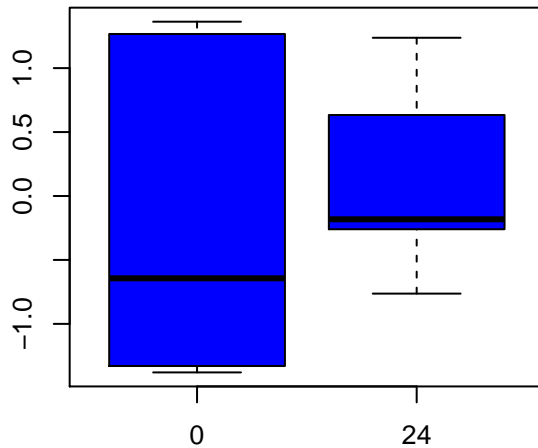

OVCAR

**cytidine-5'-diphosphoethanolamine**

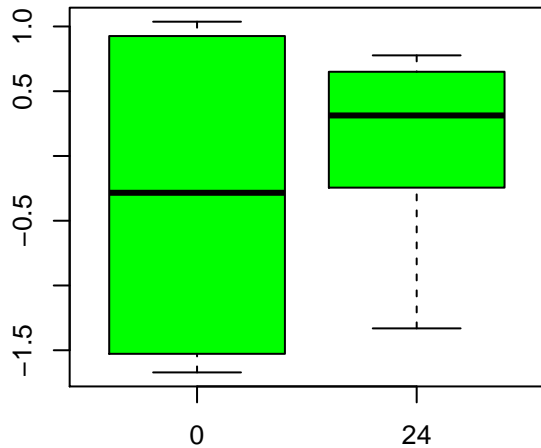

HCT15

**cytidine-5'-diphosphoethanolamine**

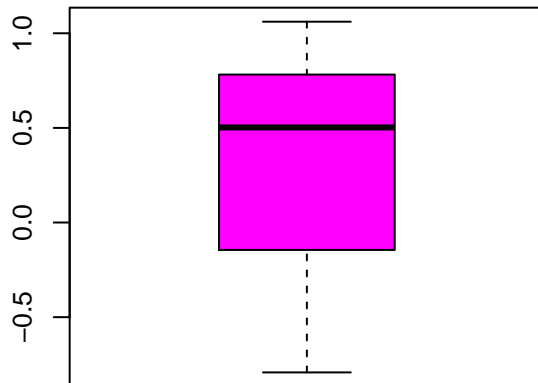

SKOV3

# cytidine-5'-diphosphoethanolamine

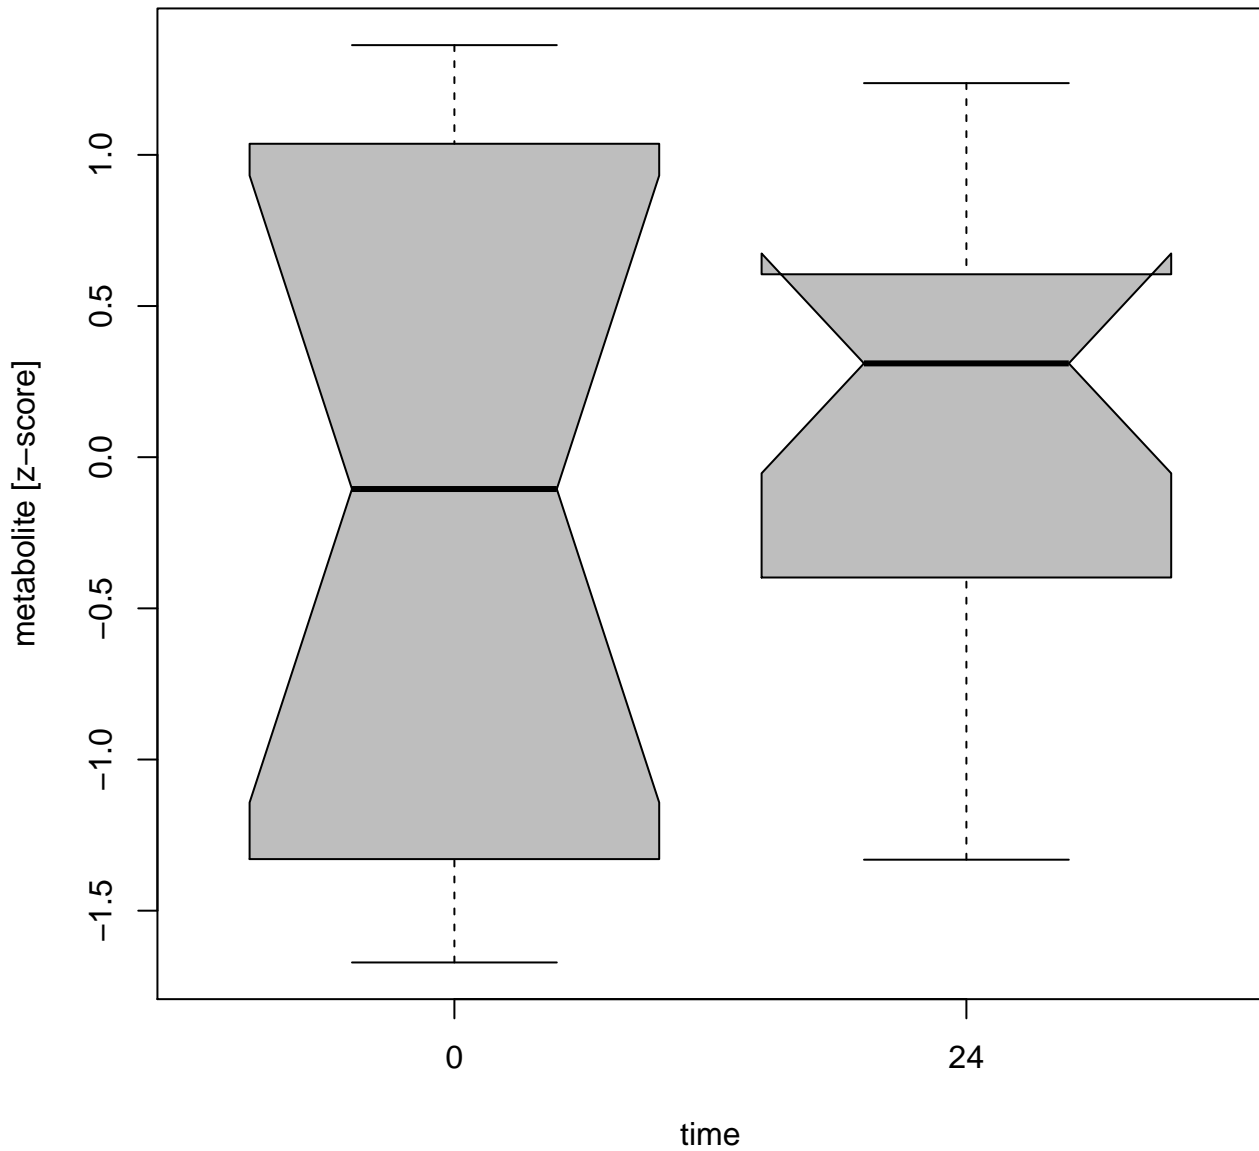

**deoxycarnitine**

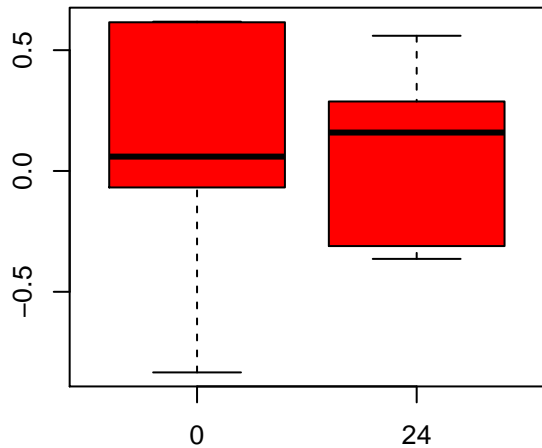

HCT116

**deoxycarnitine**

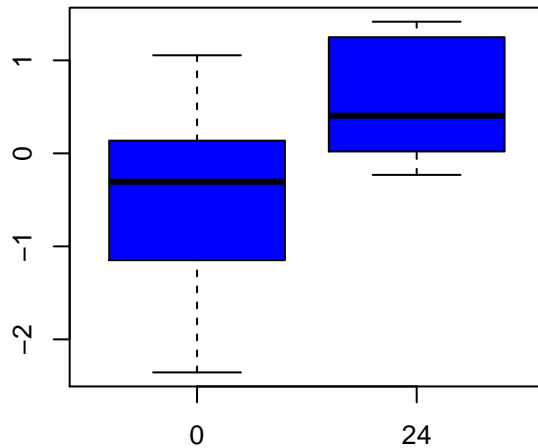

OVCAR

**deoxycarnitine**

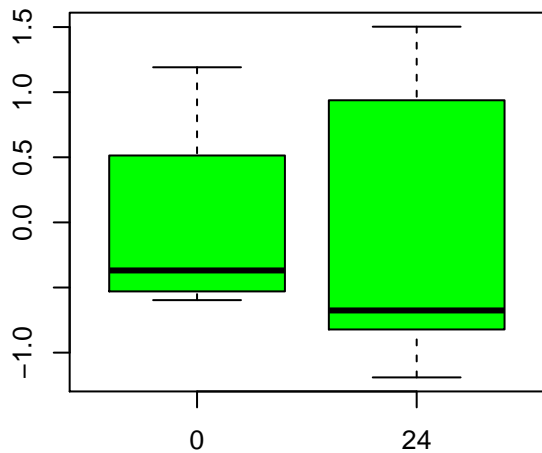

HCT15

**deoxycarnitine**

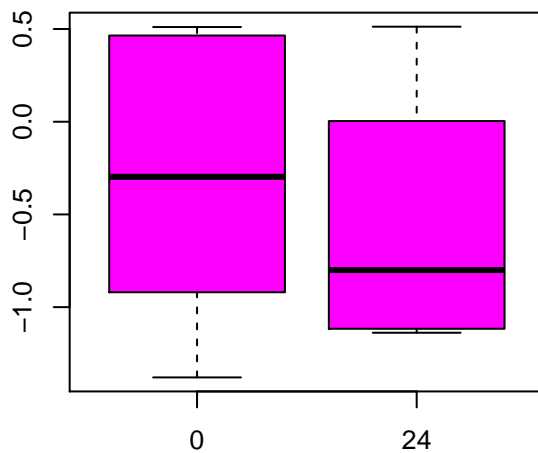

SKOV3



# deoxycarnitine

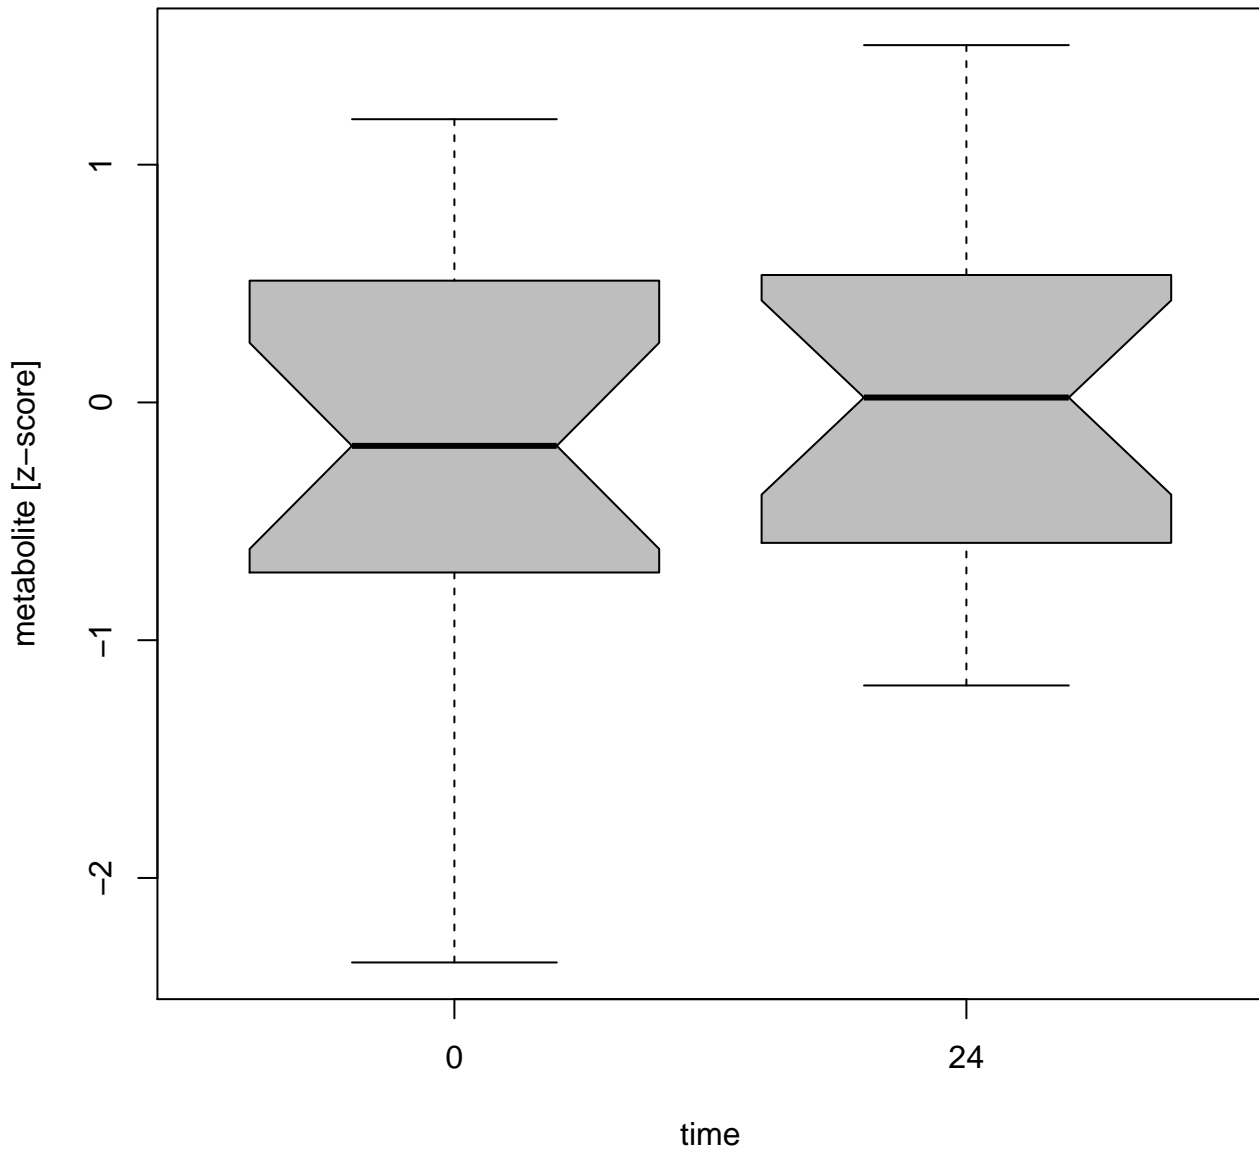

**dihomo-linoleate (20:2n6)**

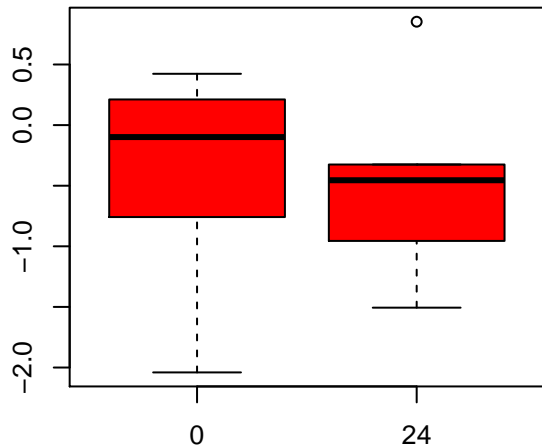

HCT116

**dihomo-linoleate (20:2n6)**

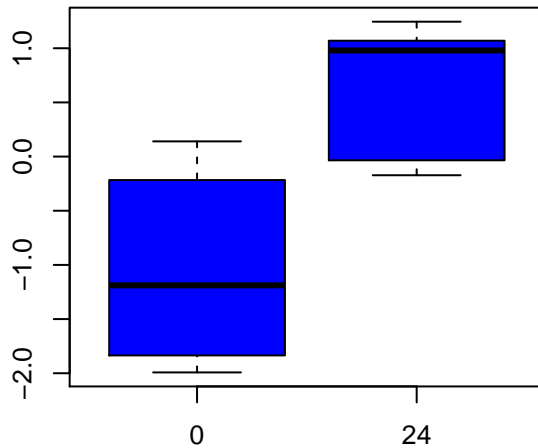

OVCAR

**dihomo-linoleate (20:2n6)**

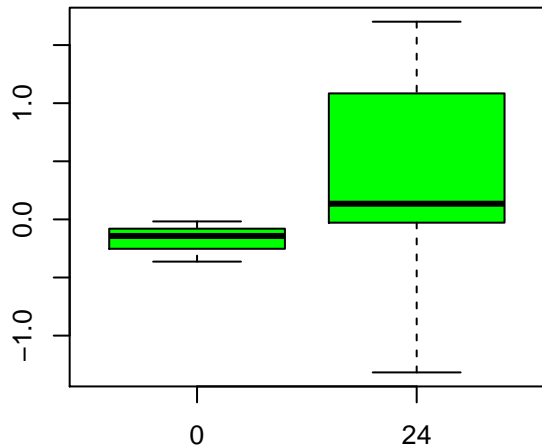

HCT15

**dihomo-linoleate (20:2n6)**

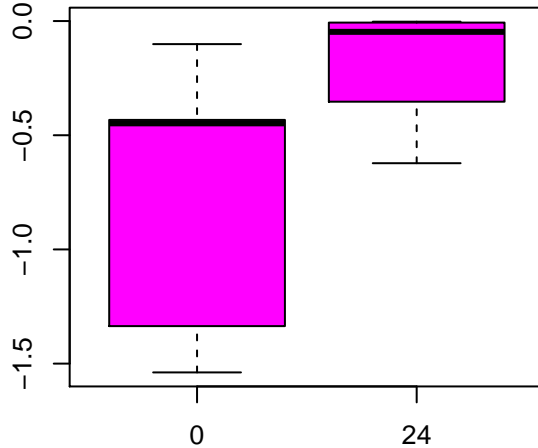

SKOV3

# dihomo-linoleate (20:2n6)

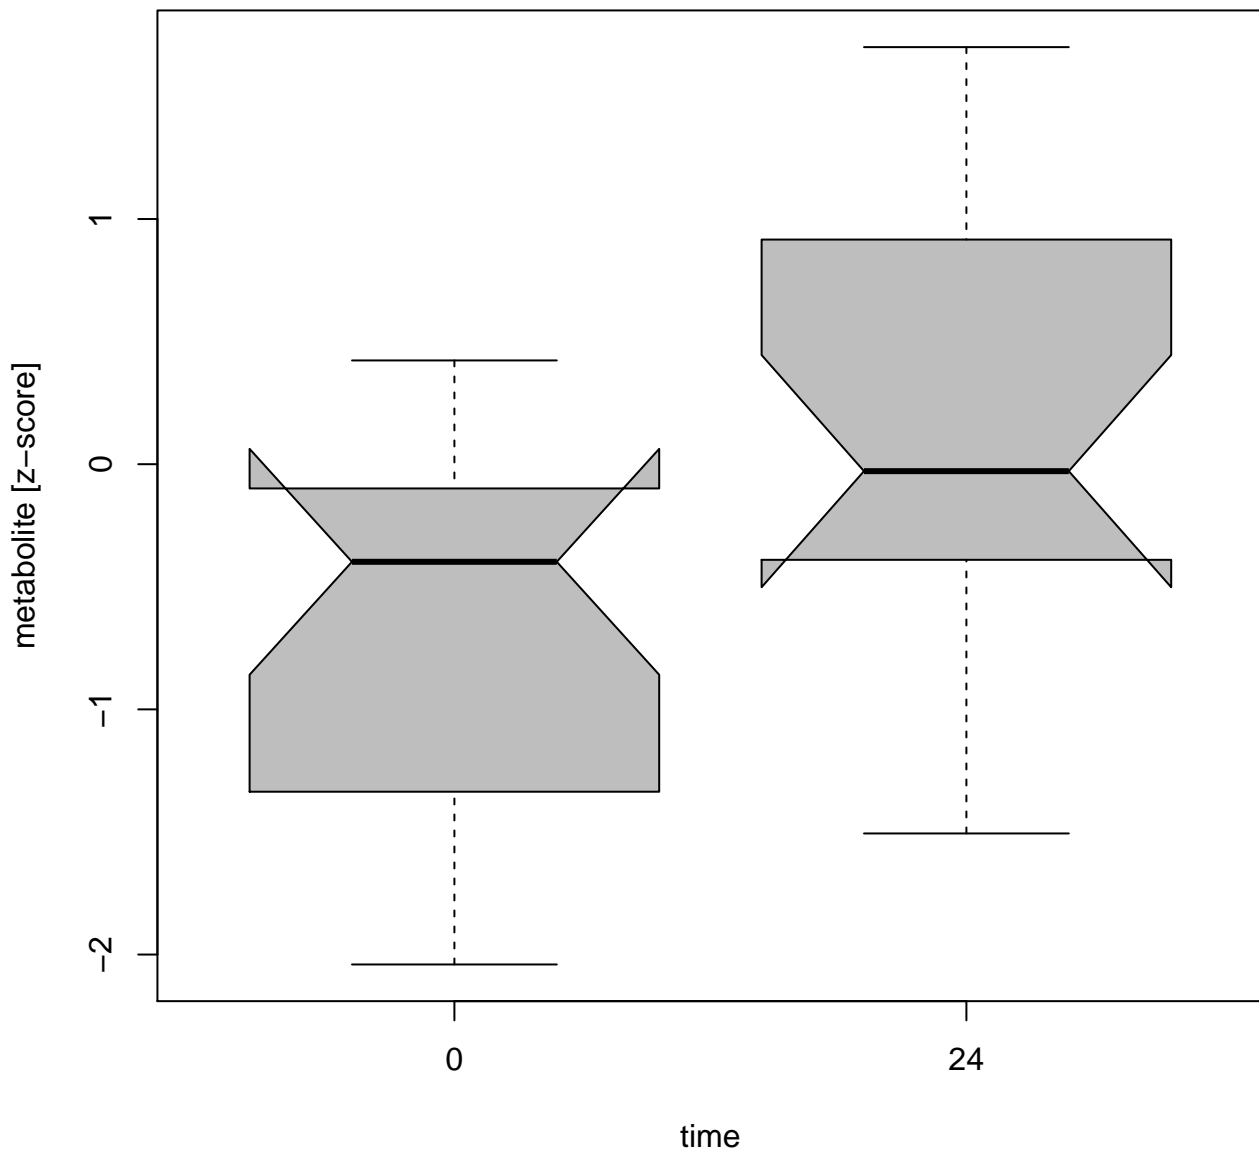

**dihomo-linolenate (20:3n3 or n6)**

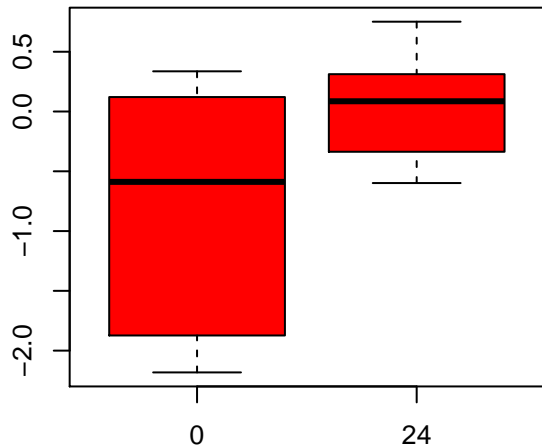

HCT116

**dihomo-linolenate (20:3n3 or n6)**

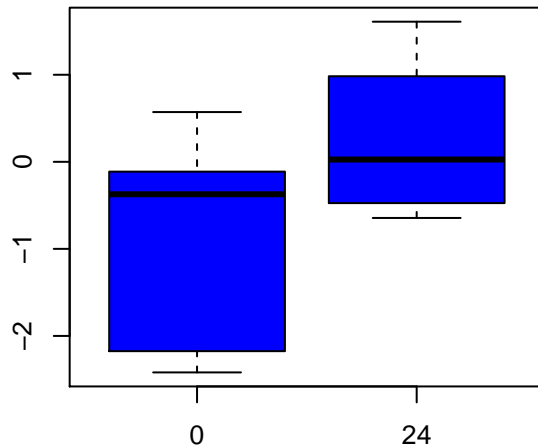

OVCAR

**dihomo-linolenate (20:3n3 or n6)**

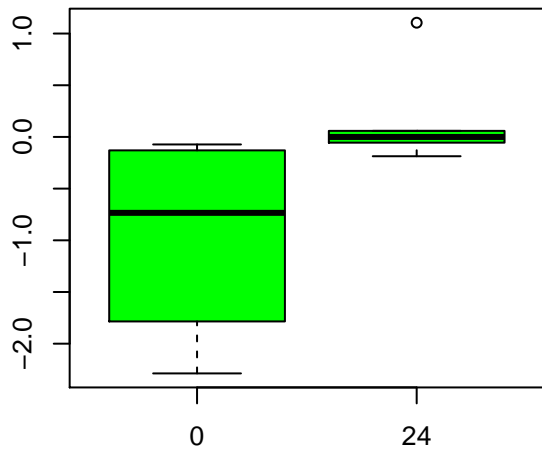

HCT15

**dihomo-linolenate (20:3n3 or n6)**

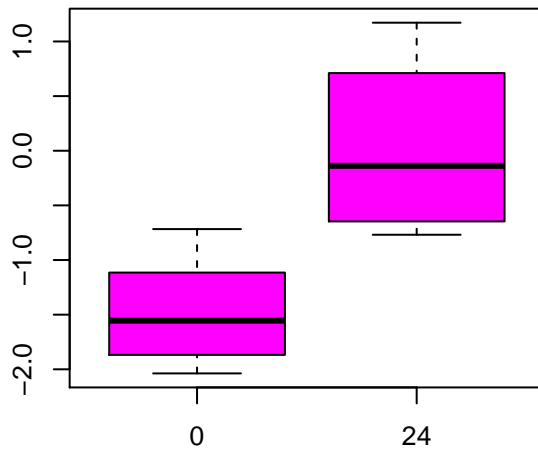

SKOV3

# dihomo-linolenate (20:3n3 or n6)

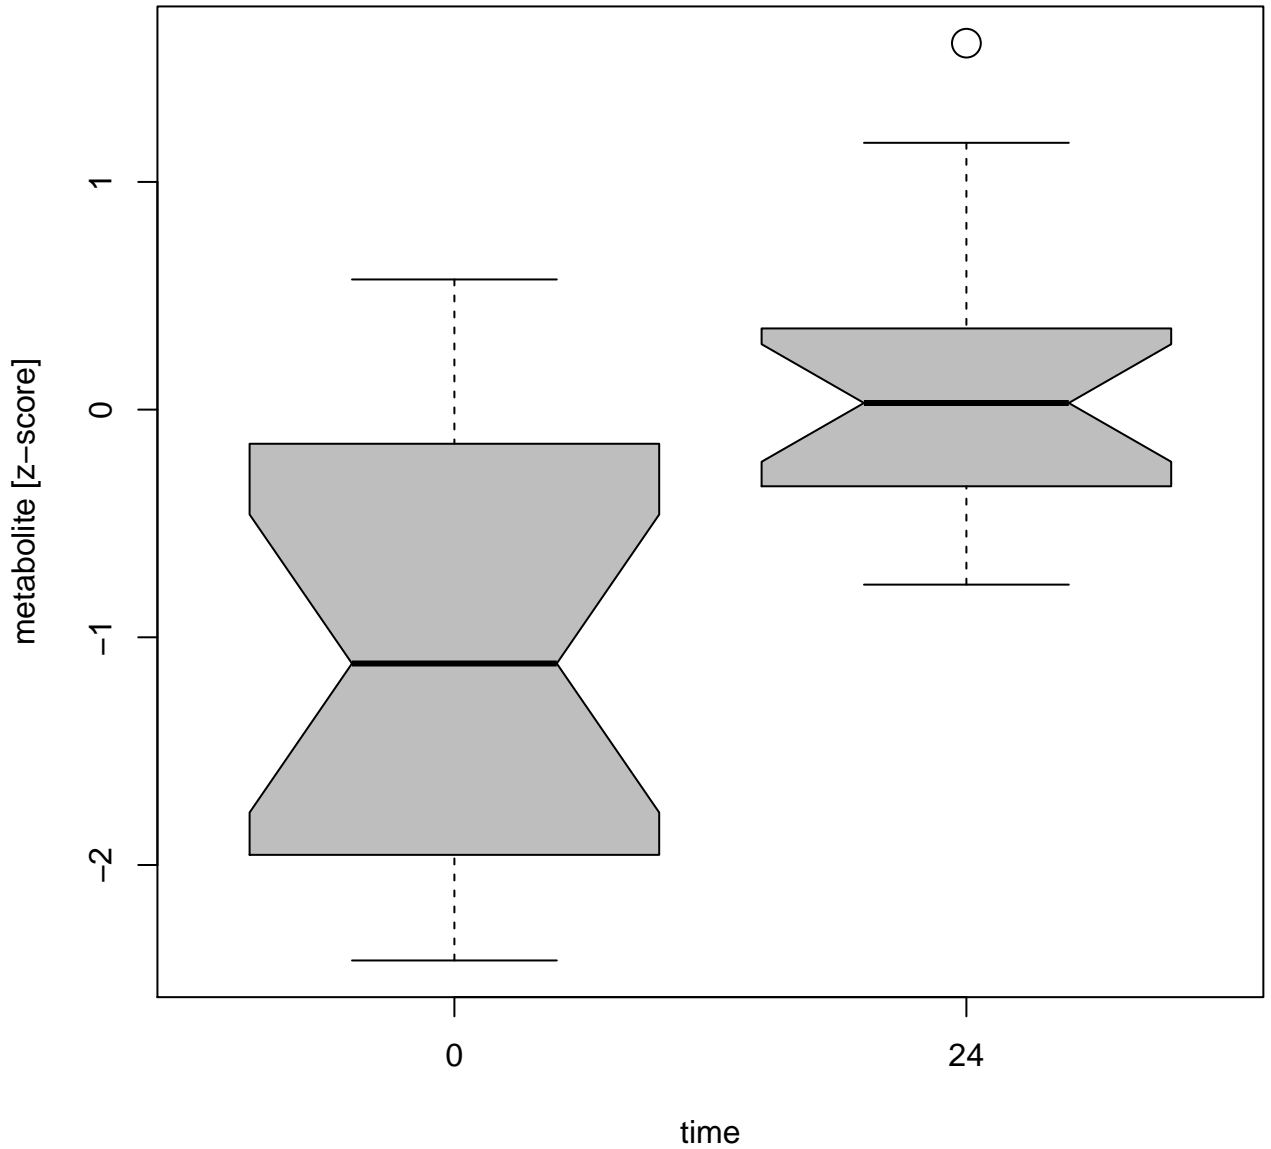

**docosahexaenoate (DHA 22:6n3)**

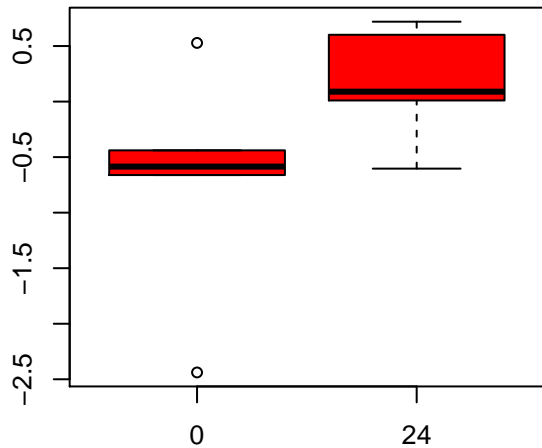

HCT116

**docosahexaenoate (DHA 22:6n3)**

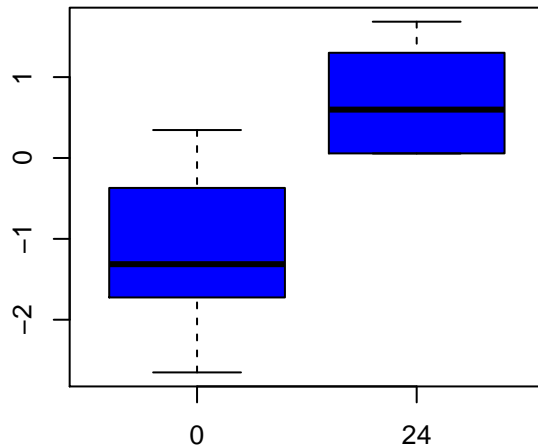

OVCAR

**docosahexaenoate (DHA 22:6n3)**

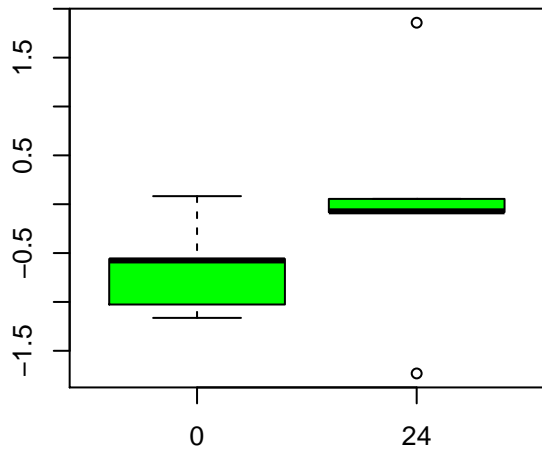

HCT15

**docosahexaenoate (DHA 22:6n3)**

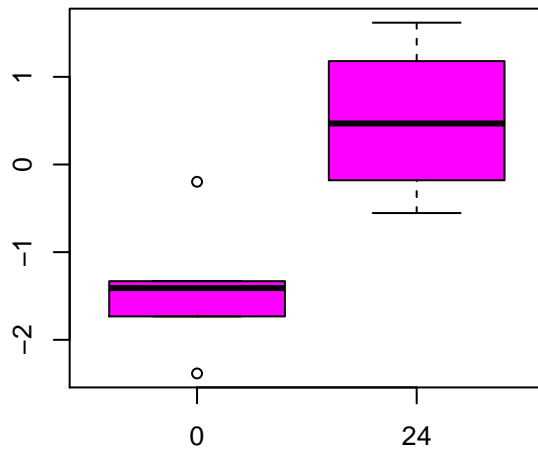

SKOV3

# docosaehaenoate (DHA 22:6n3)

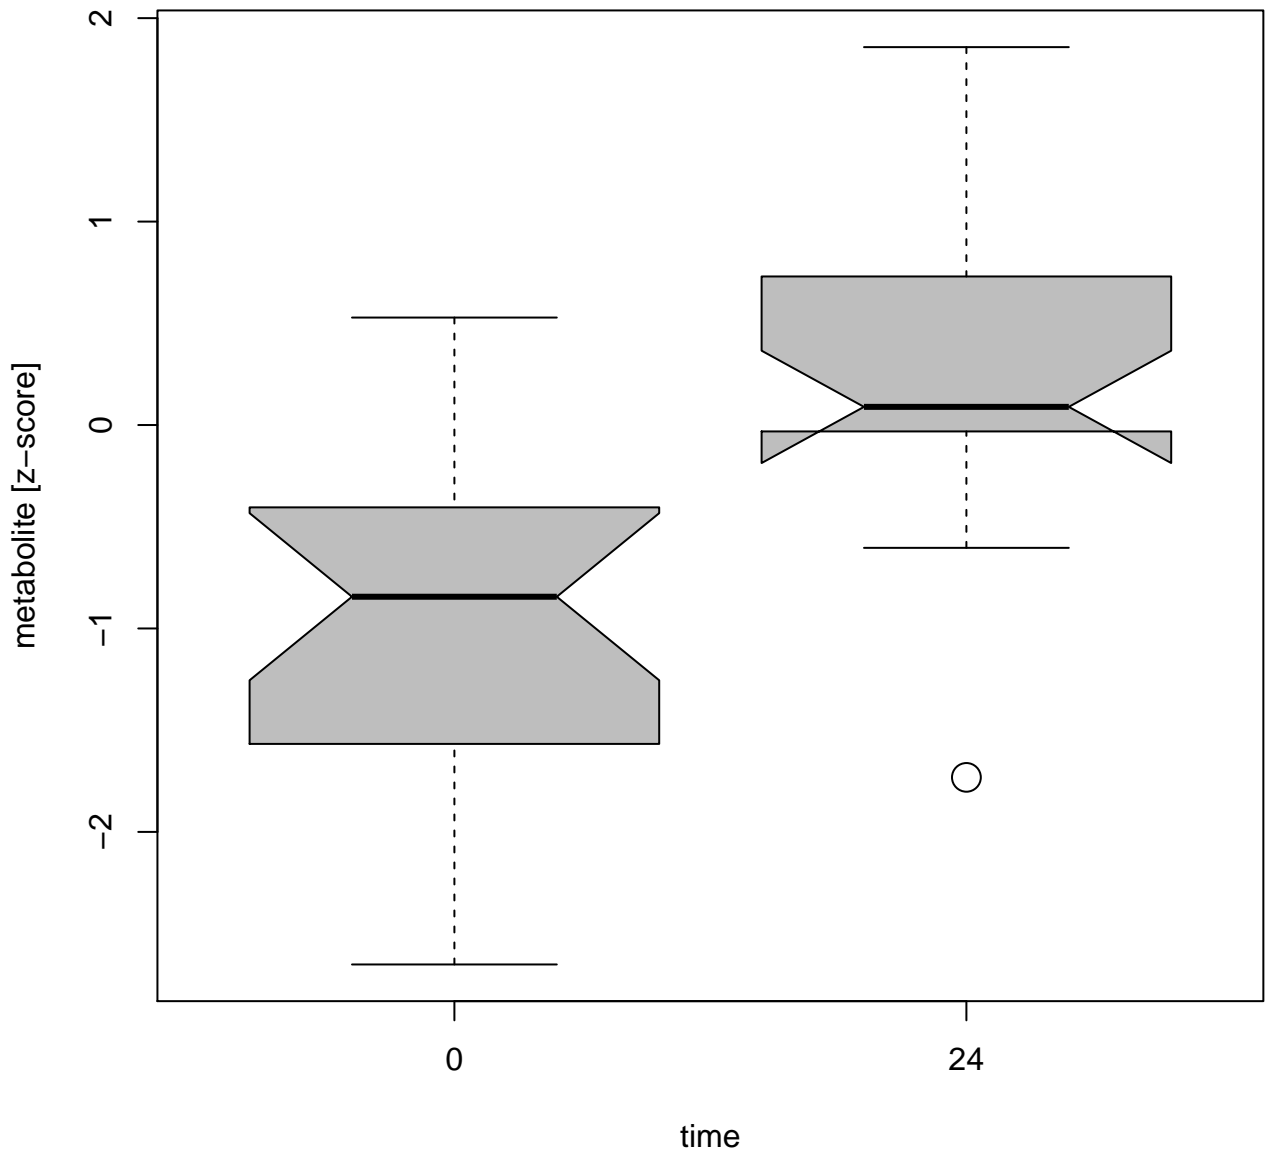

**docosapentaenoate (n3 DPA 22:5n3)**

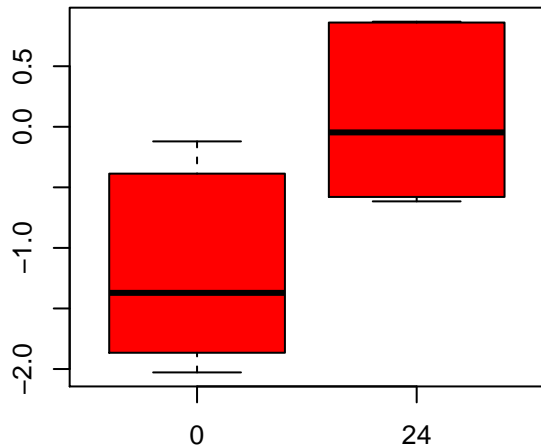

HCT116

**docosapentaenoate (n3 DPA 22:5n3)**

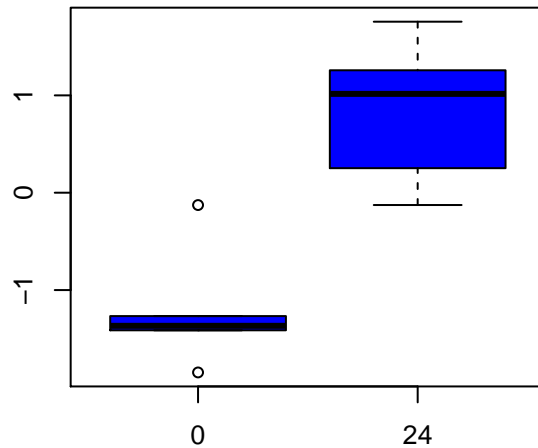

OVCAR

**docosapentaenoate (n3 DPA 22:5n3)**

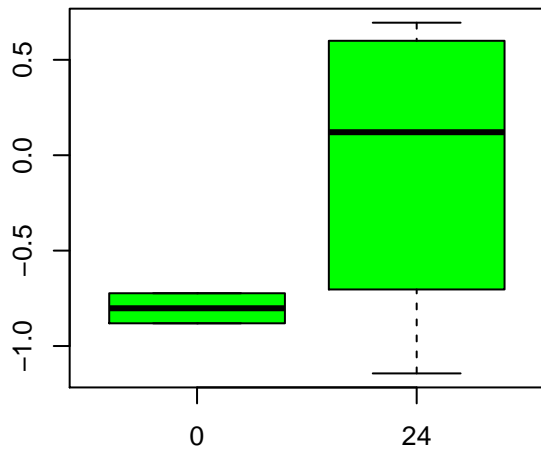

HCT15

**docosapentaenoate (n3 DPA 22:5n3)**

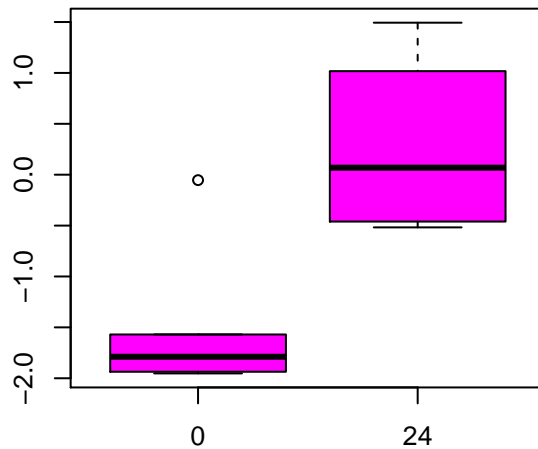

SKOV3



# docosapentaenoate (n3 DPA 22:5n3)

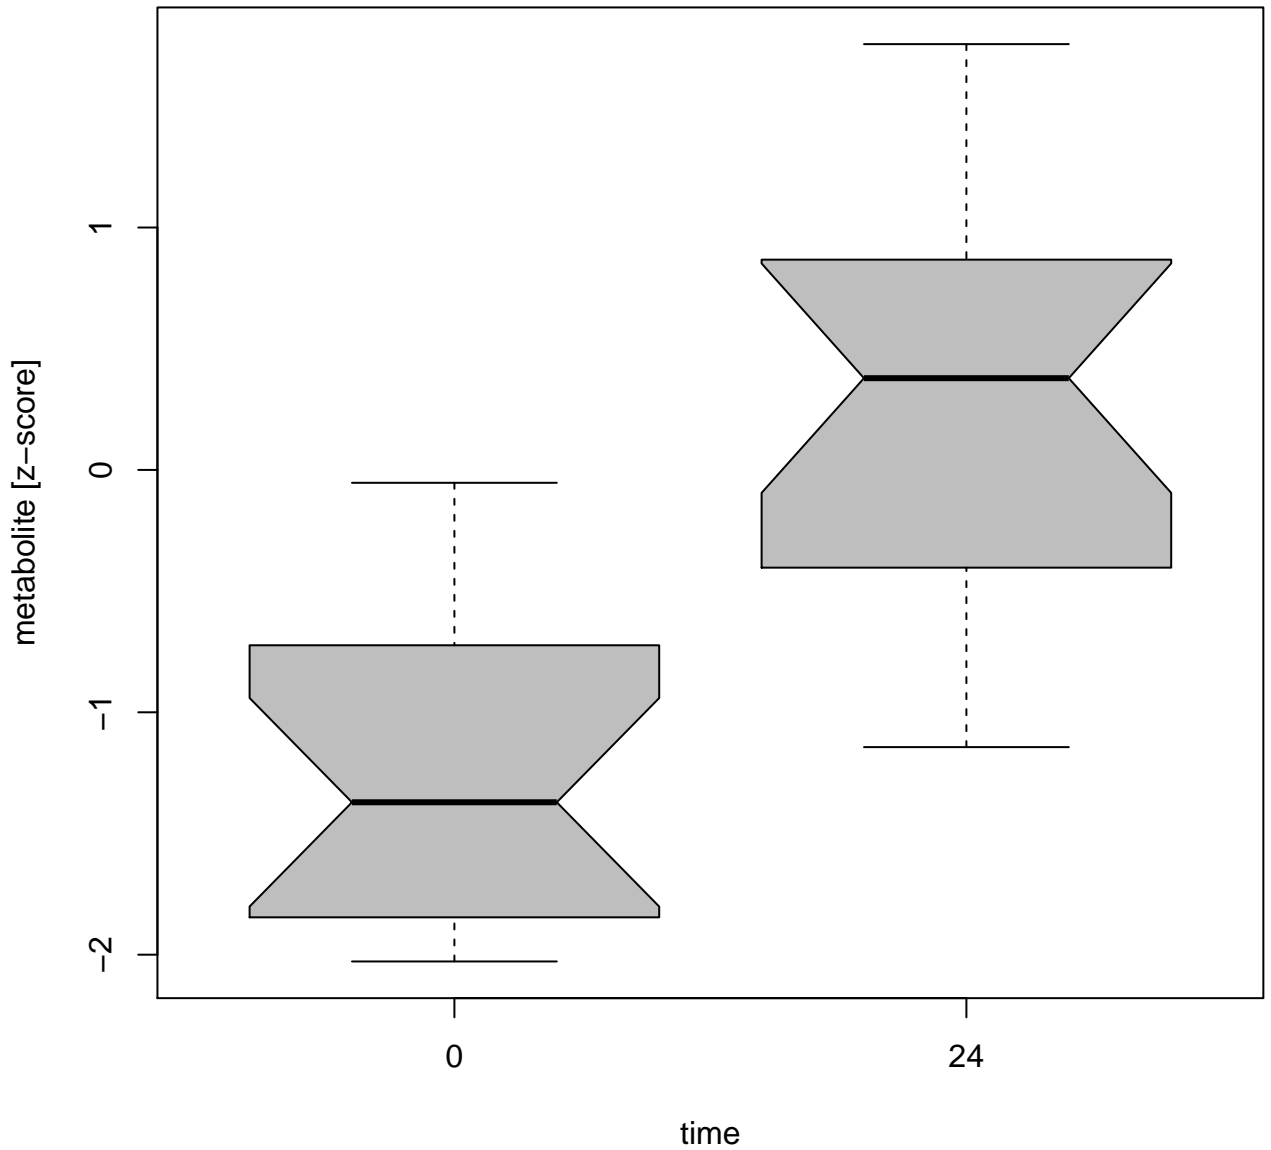

**EDTA**

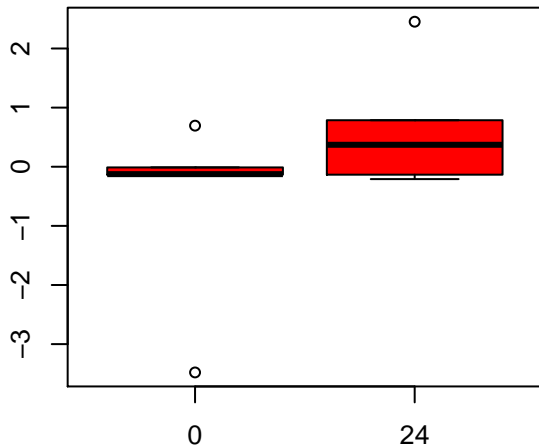

**EDTA**

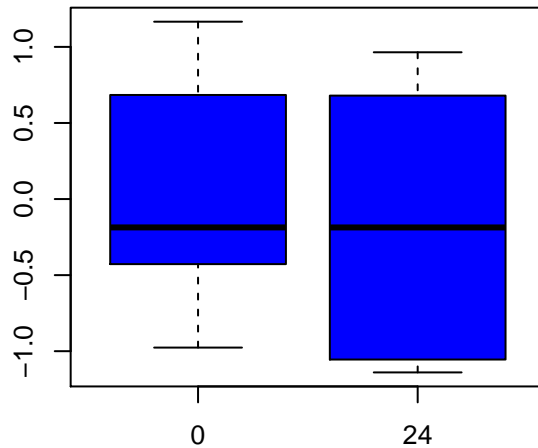

**HCT116**

**EDTA**

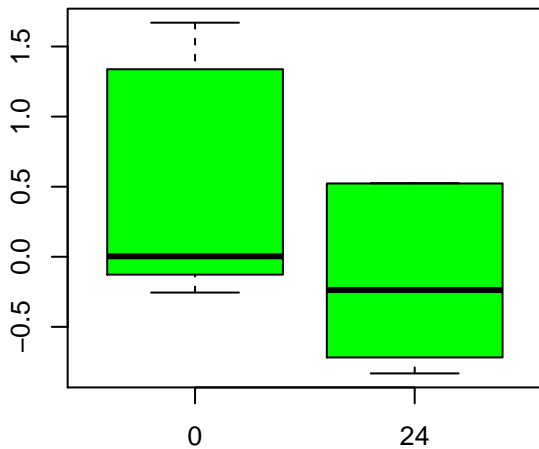

**OVCAR**

**EDTA**

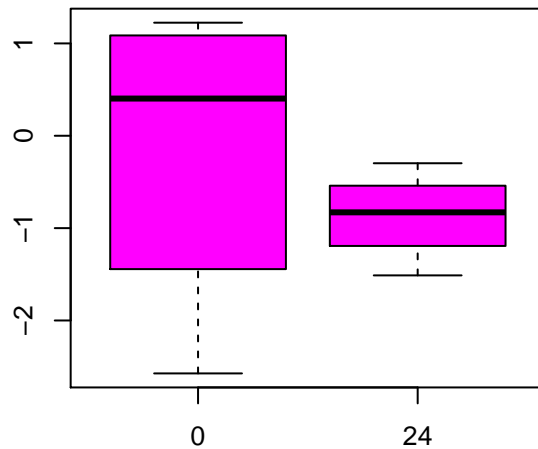

**HCT15**

**SKOV3**

# EDTA

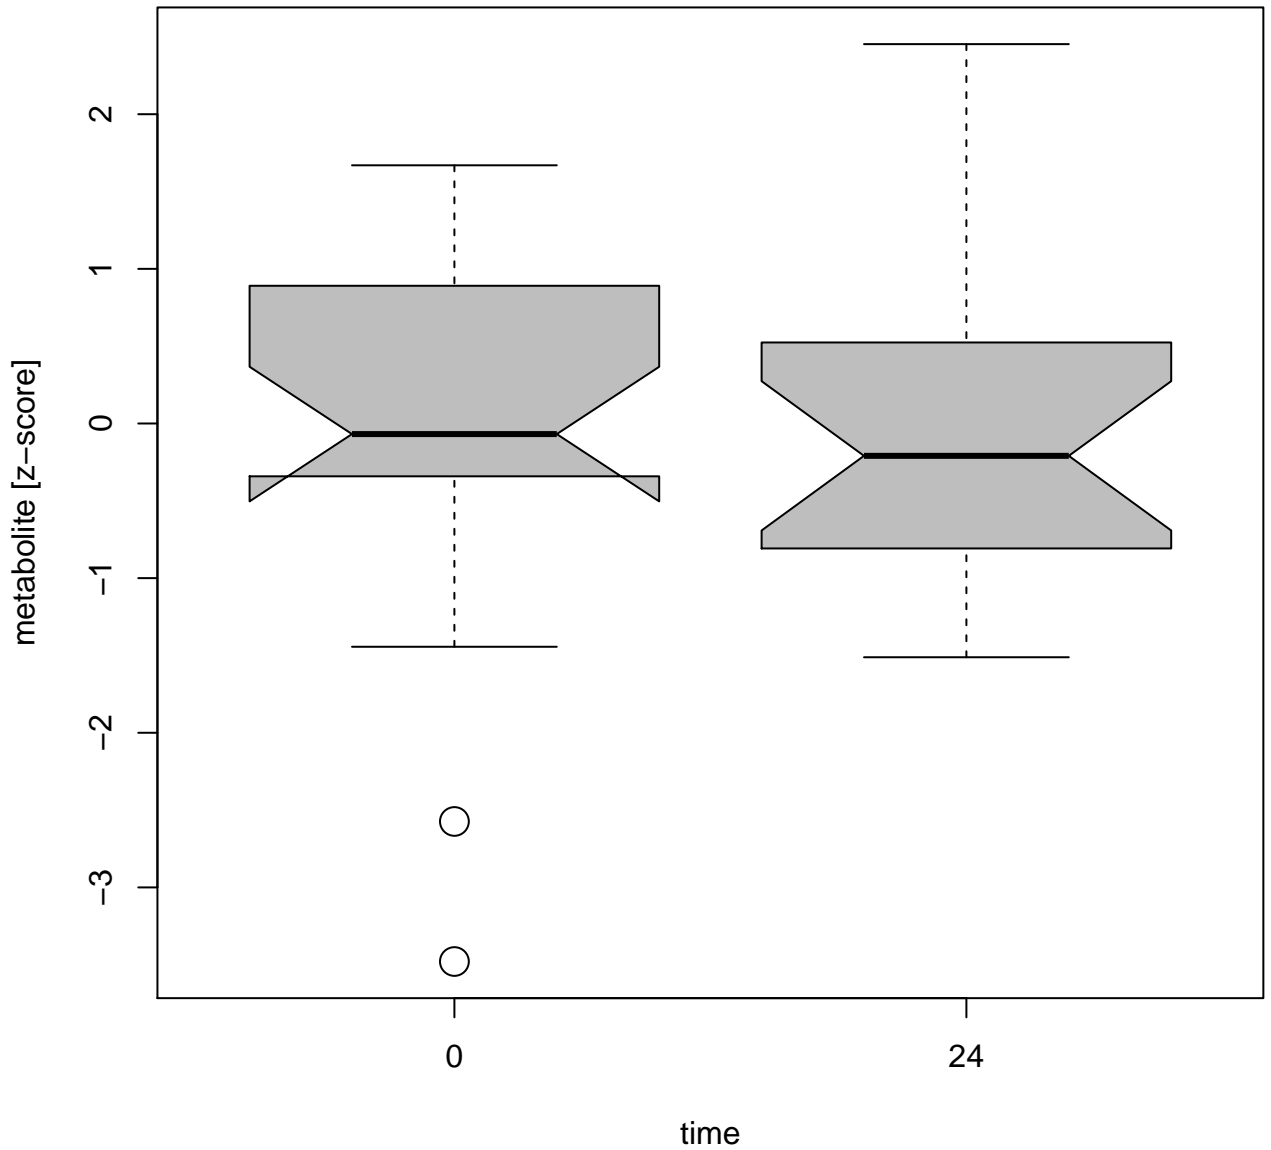

**eicosapentaenoate (EPA 20:5n3)**

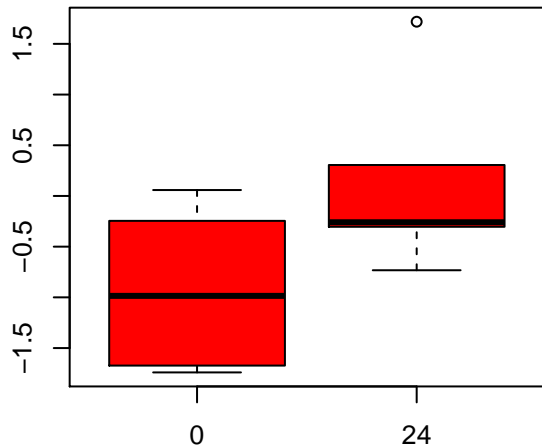

HCT116

**eicosapentaenoate (EPA 20:5n3)**

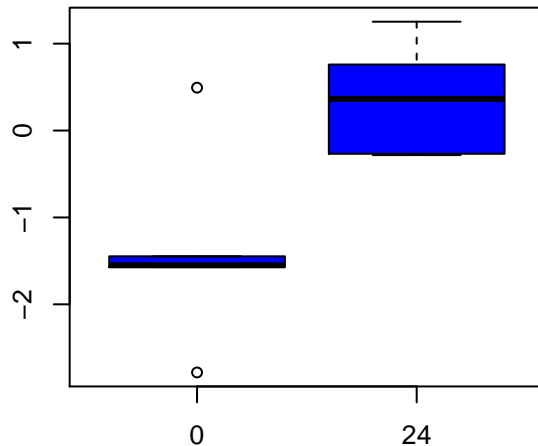

OVCAR

**eicosapentaenoate (EPA 20:5n3)**

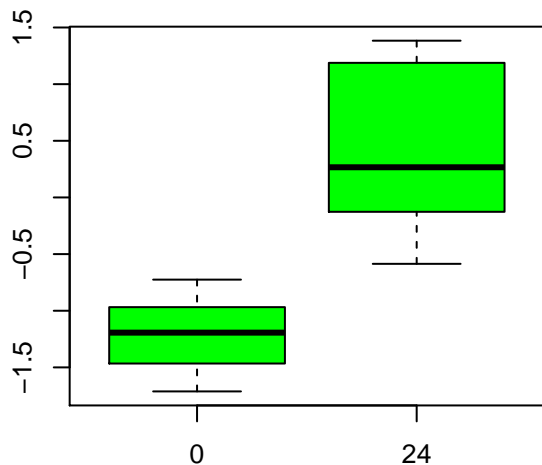

HCT15

**eicosapentaenoate (EPA 20:5n3)**

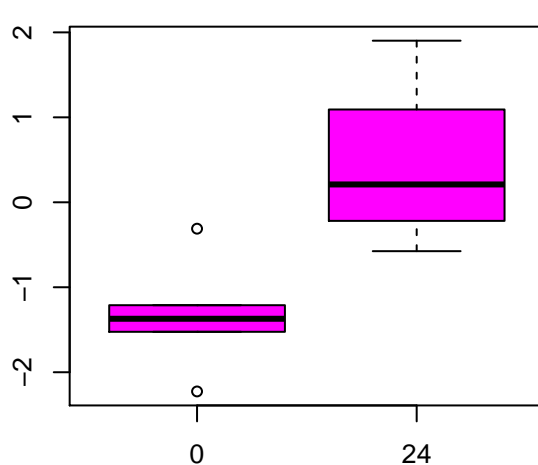

SKOV3

# eicosapentaenoate (EPA 20:5n3)

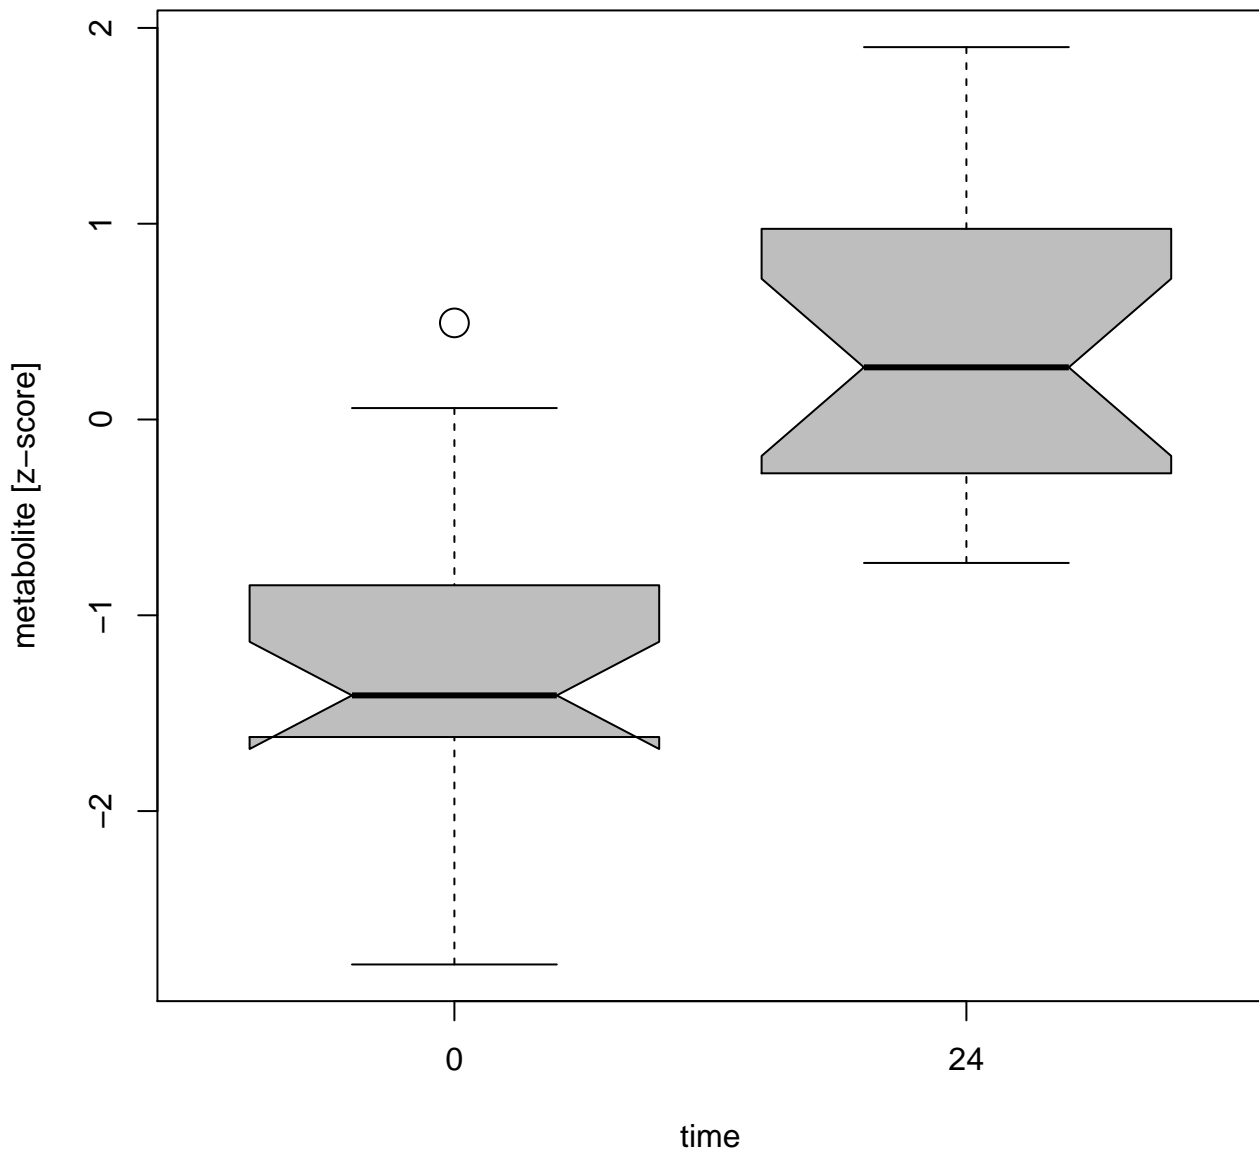

**eicosenoate (20:1n9 or 11)**

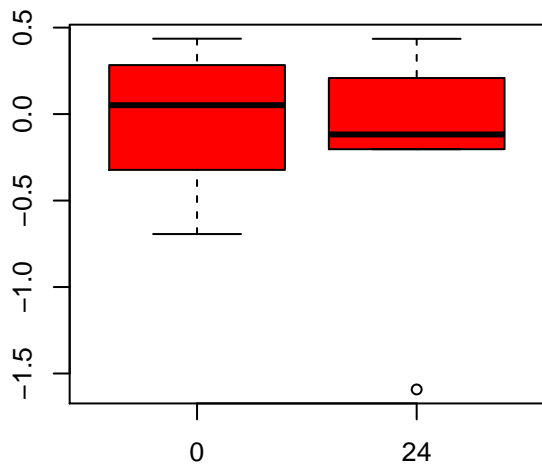

HCT116

**eicosenoate (20:1n9 or 11)**

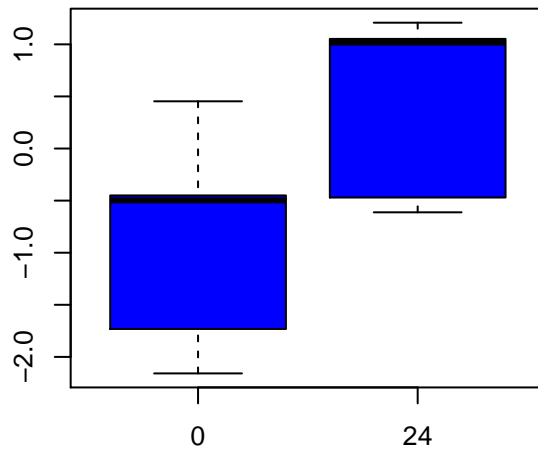

OVCAR

**eicosenoate (20:1n9 or 11)**

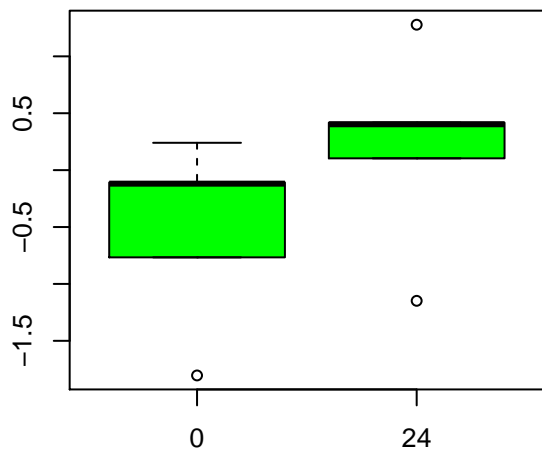

HCT15

**eicosenoate (20:1n9 or 11)**

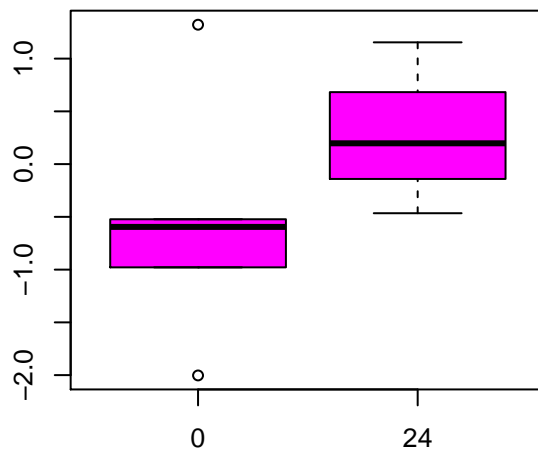

SKOV3

# eicosenoate (20:1n9 or 11)

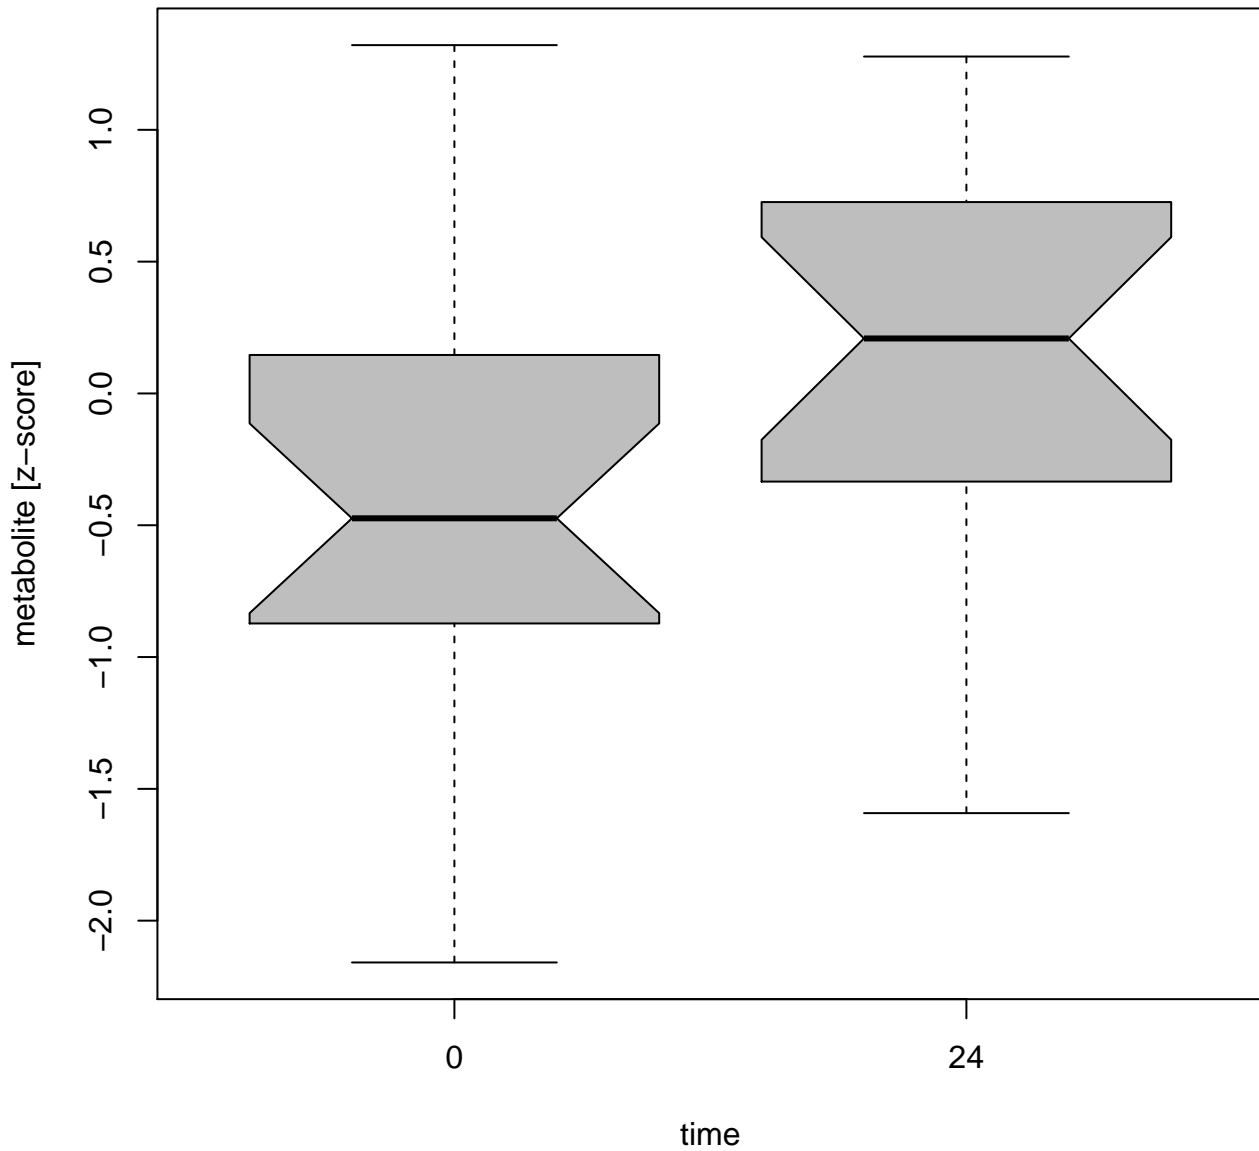

**fumarate**

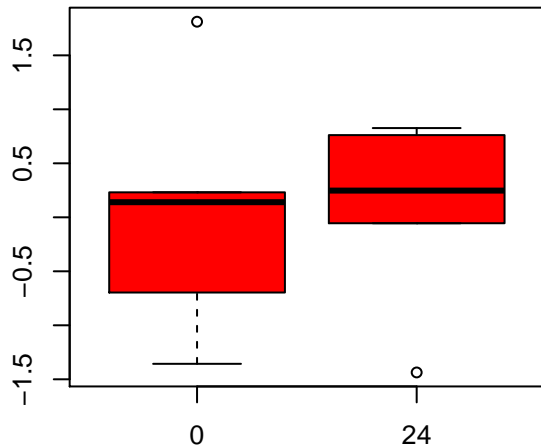

HCT116

**fumarate**

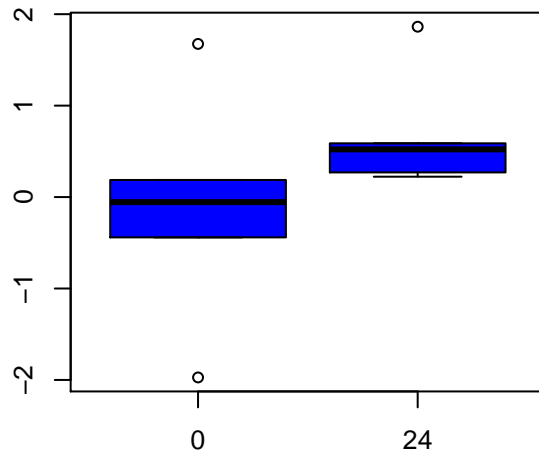

OVCAR

**fumarate**

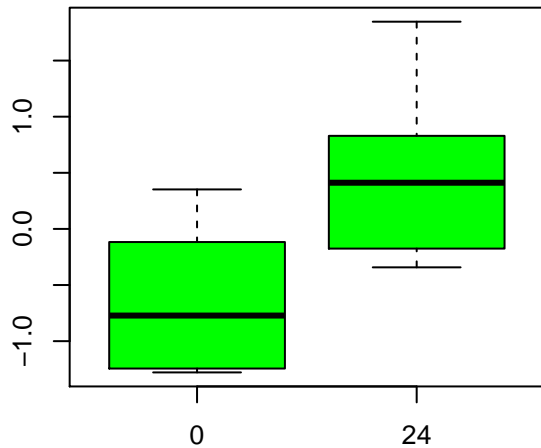

HCT15

**fumarate**

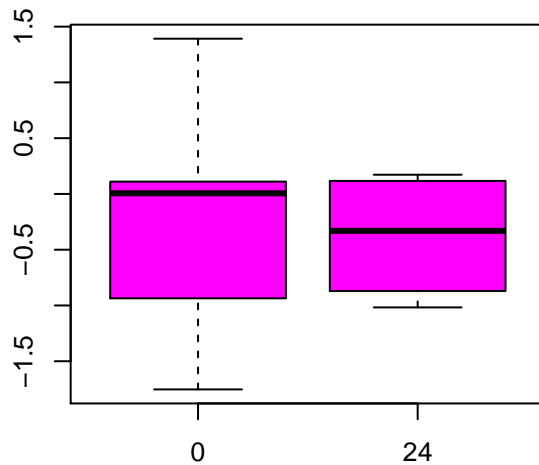

SKOV3



# fumarate

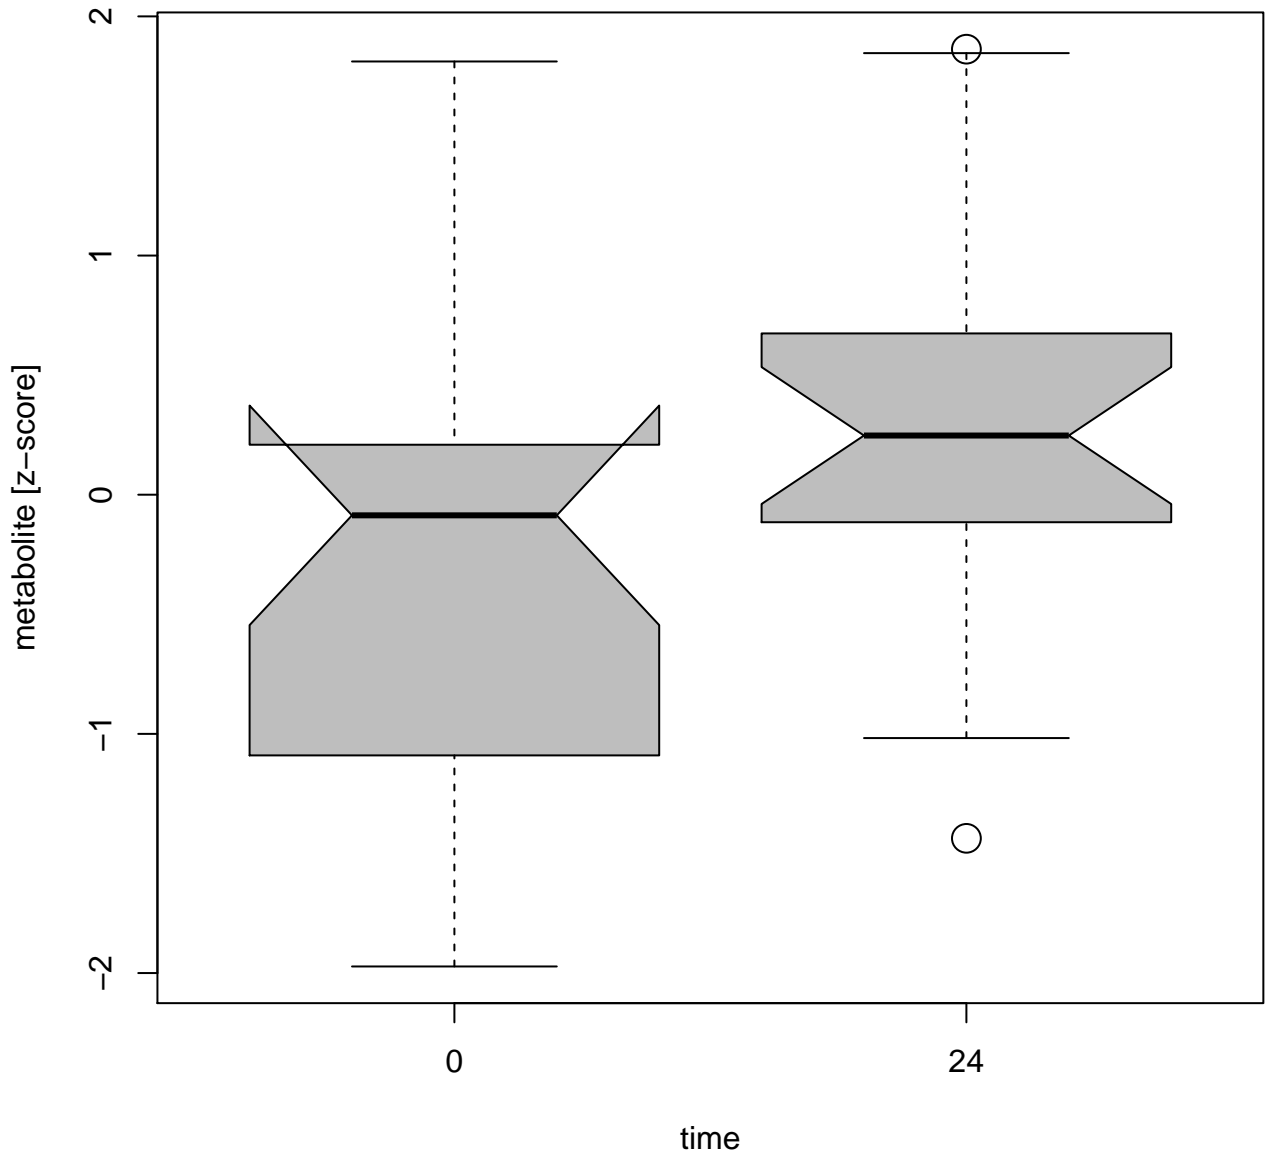

**gamma-glutamylglutamate**

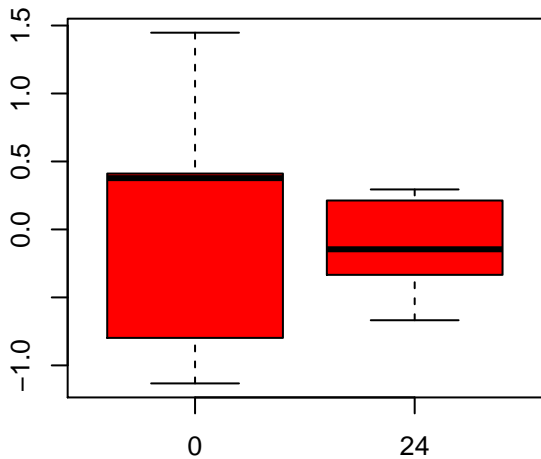

HCT116

**gamma-glutamylglutamate**

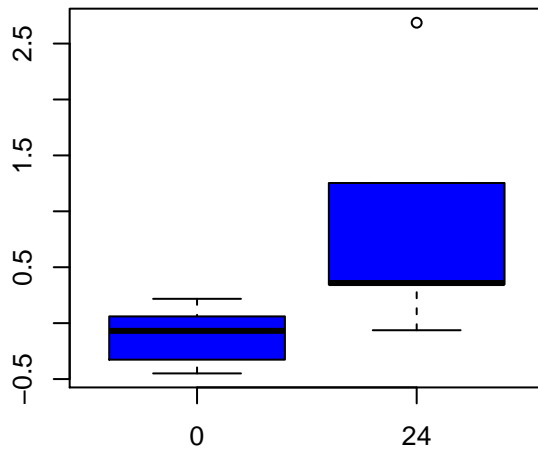

OVCAR

**gamma-glutamylglutamate**

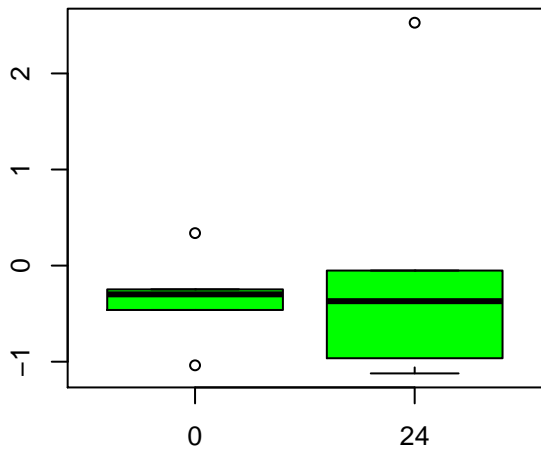

HCT15

**gamma-glutamylglutamate**

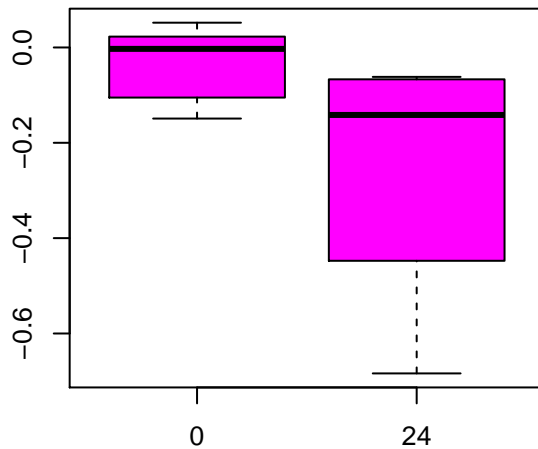

SKOV3

# gamma-glutamylglutamate

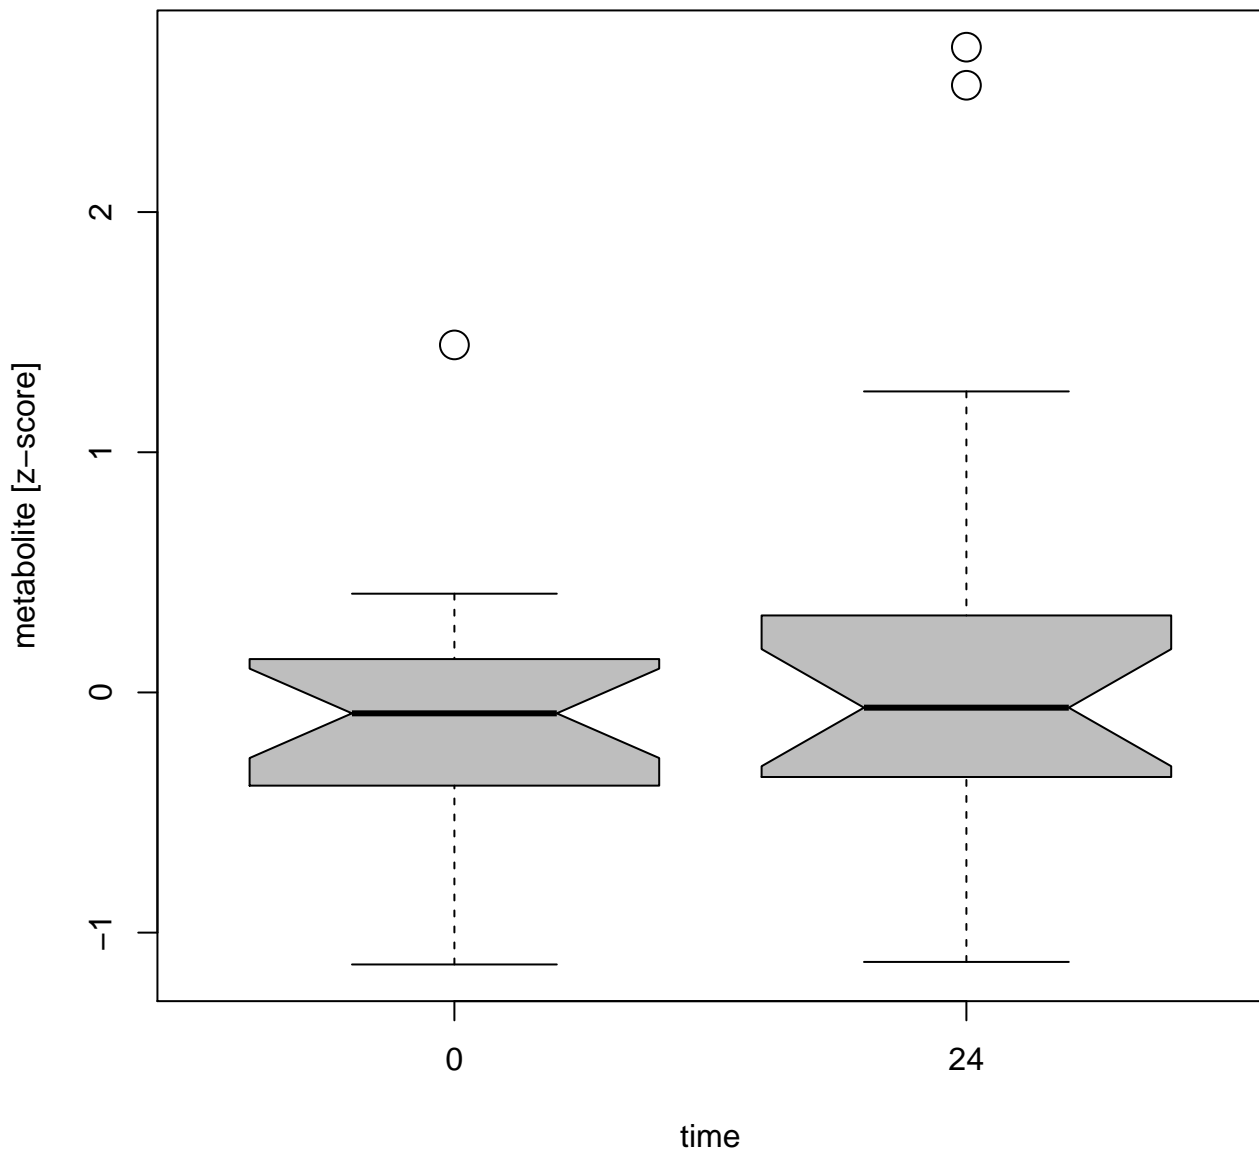

**glucose**

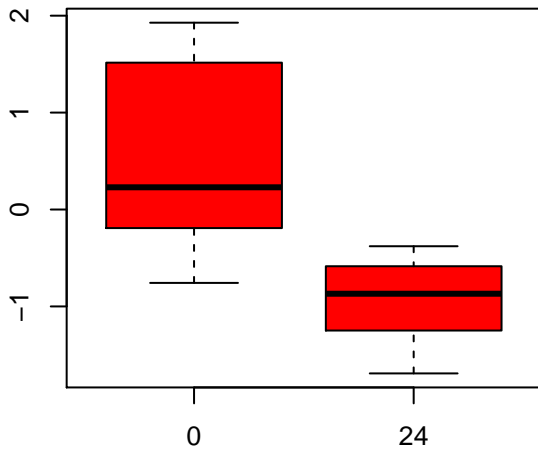

HCT116

**glucose**

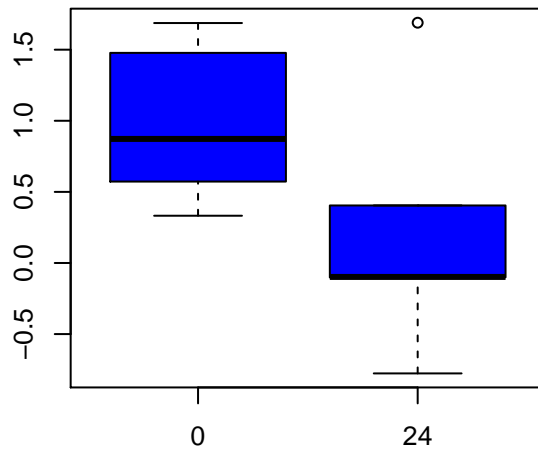

OVCAR

**glucose**

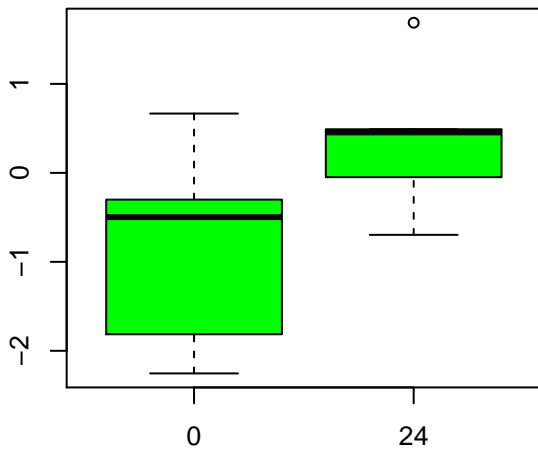

HCT15

**glucose**

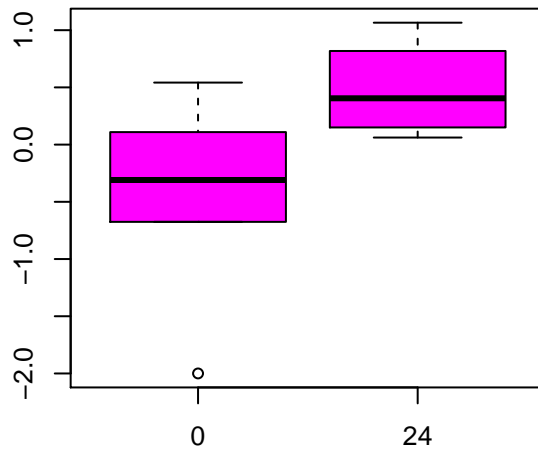

SKOV3

# glucose

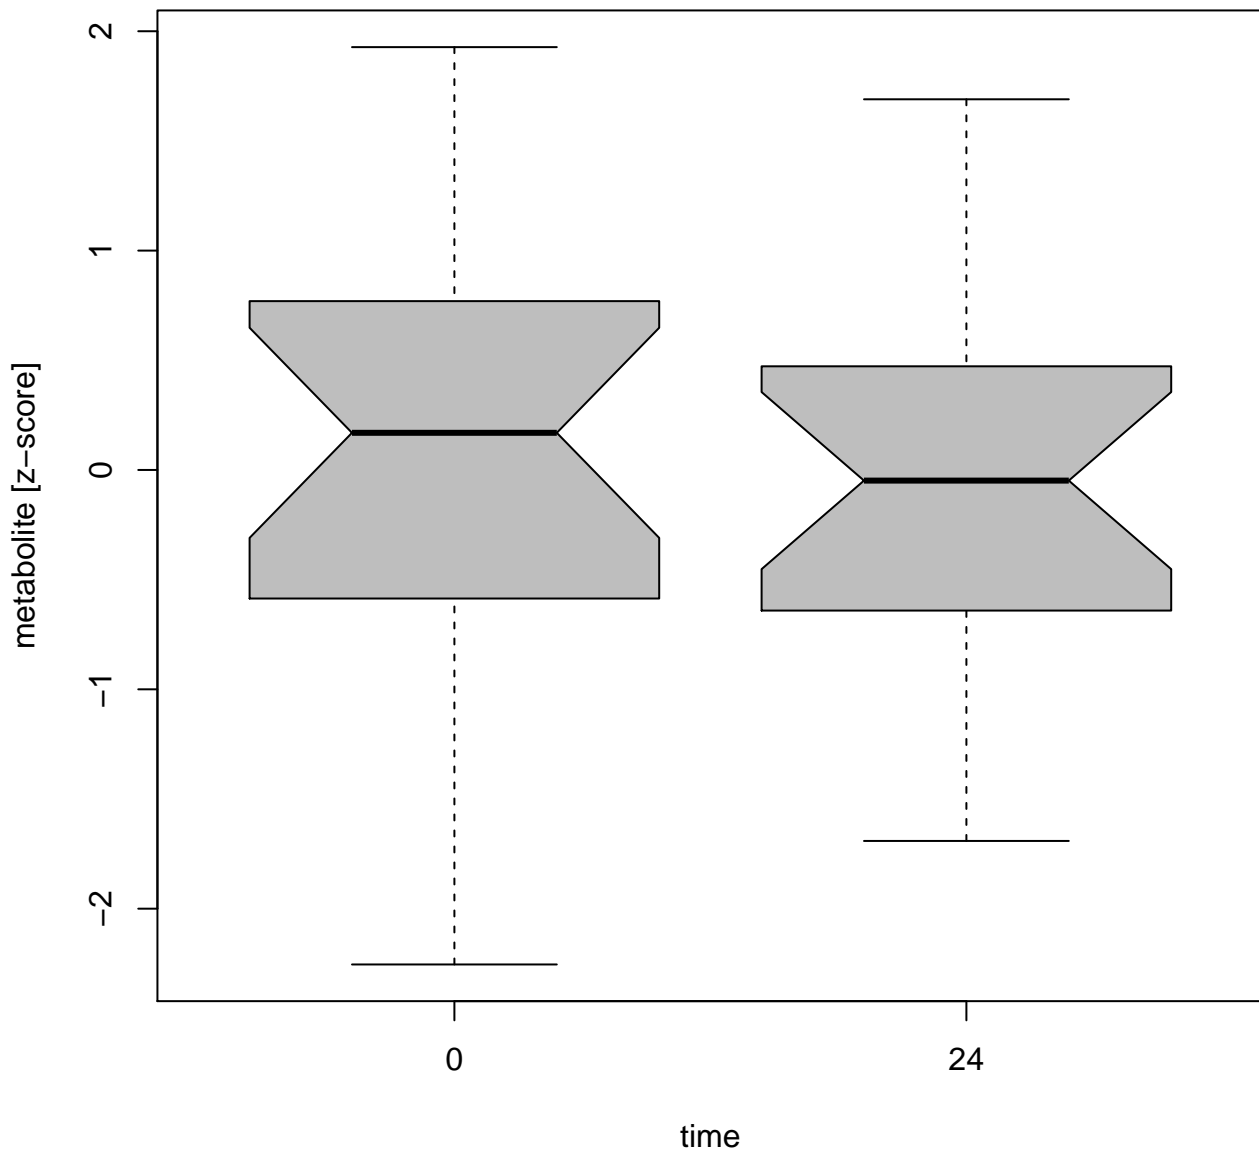

**glutamate**

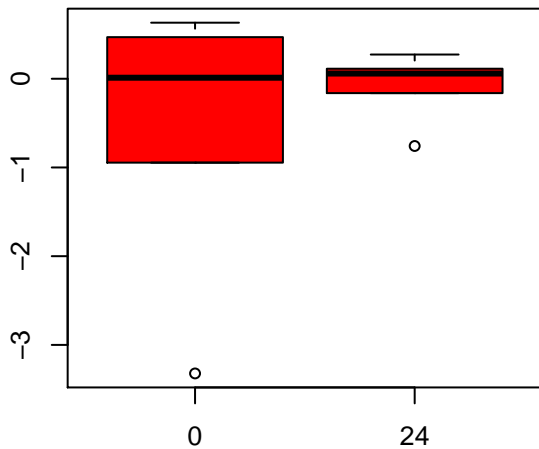

HCT116

**glutamate**

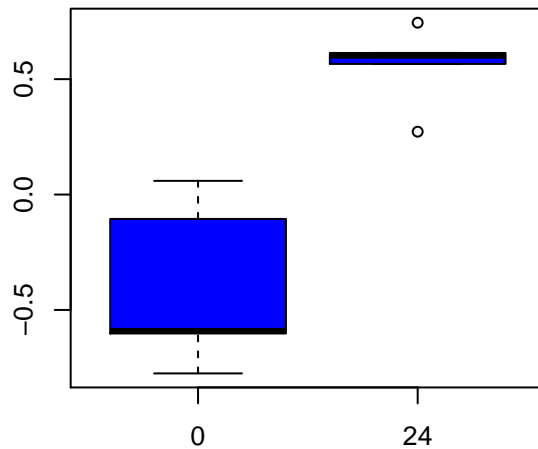

OVCAR

**glutamate**

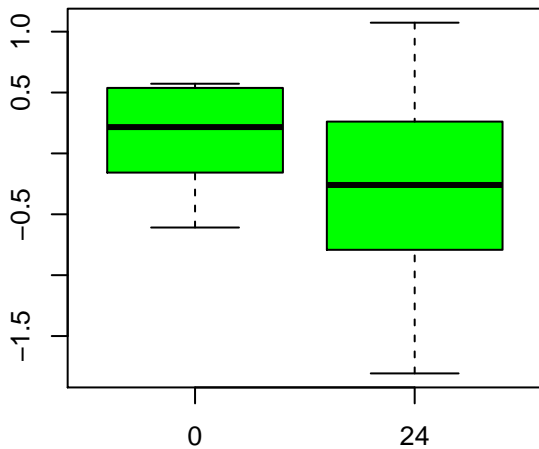

HCT15

**glutamate**

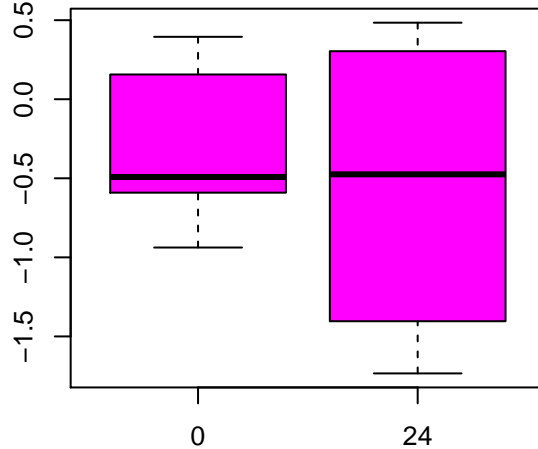

SKOV3

# glutamate

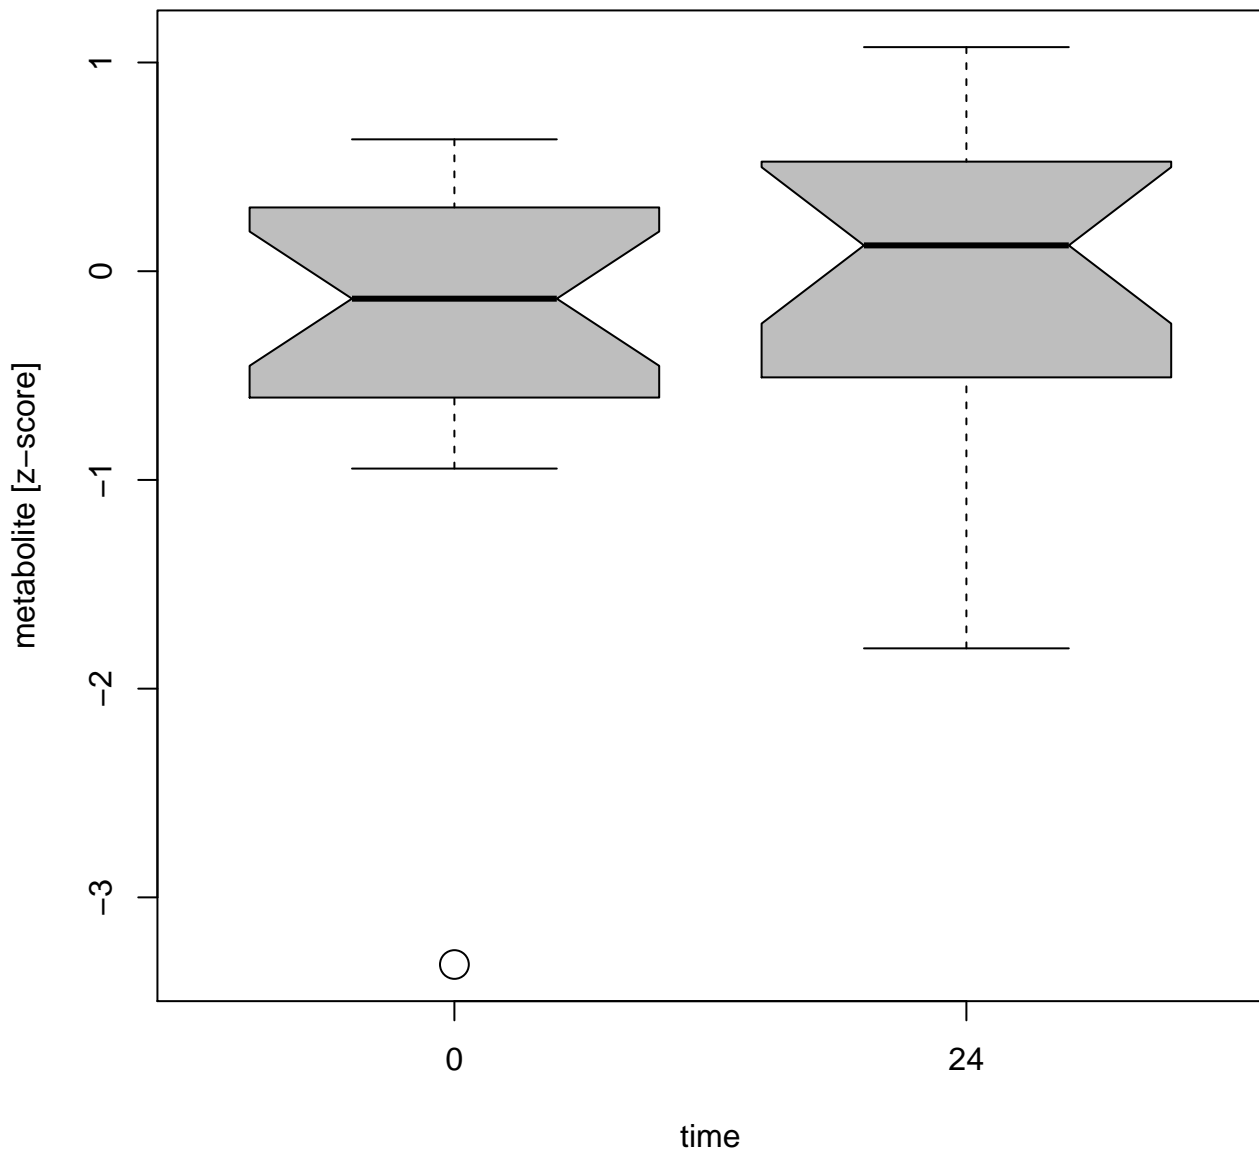

**glutamine**

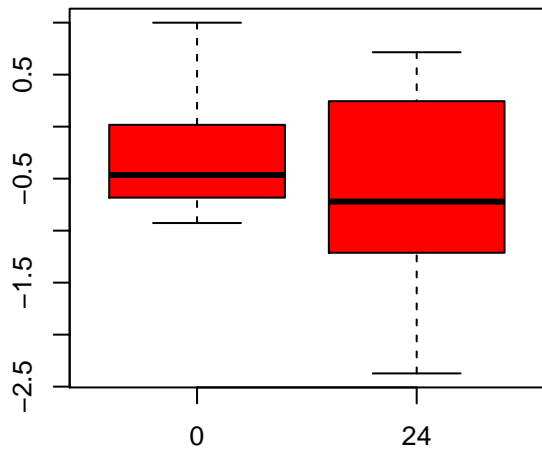

HCT116

**glutamine**

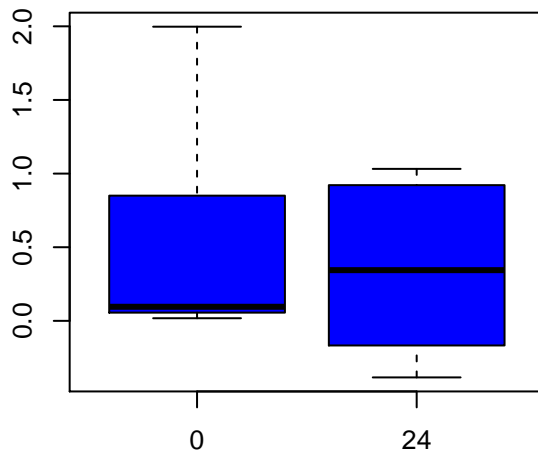

OVCAR

**glutamine**

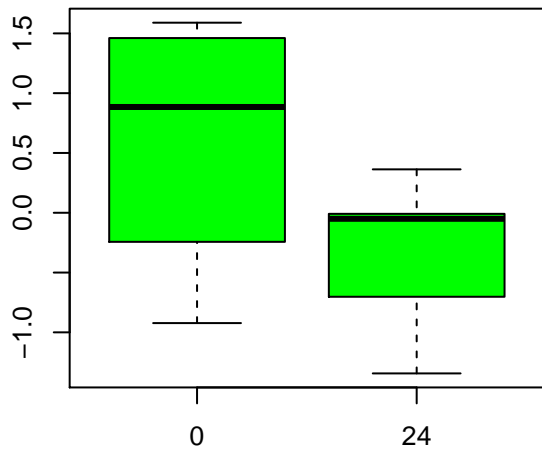

HCT15

**glutamine**

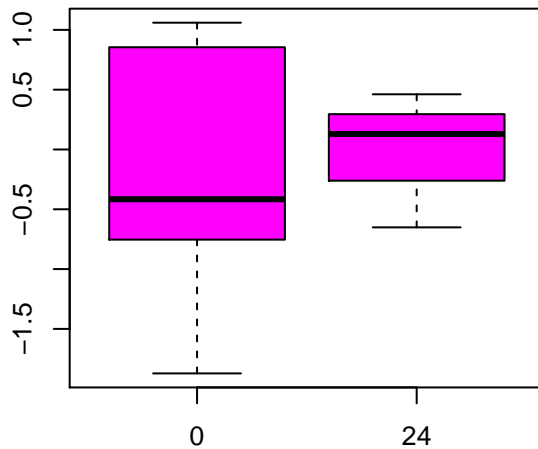

SKOV3



# glutamine

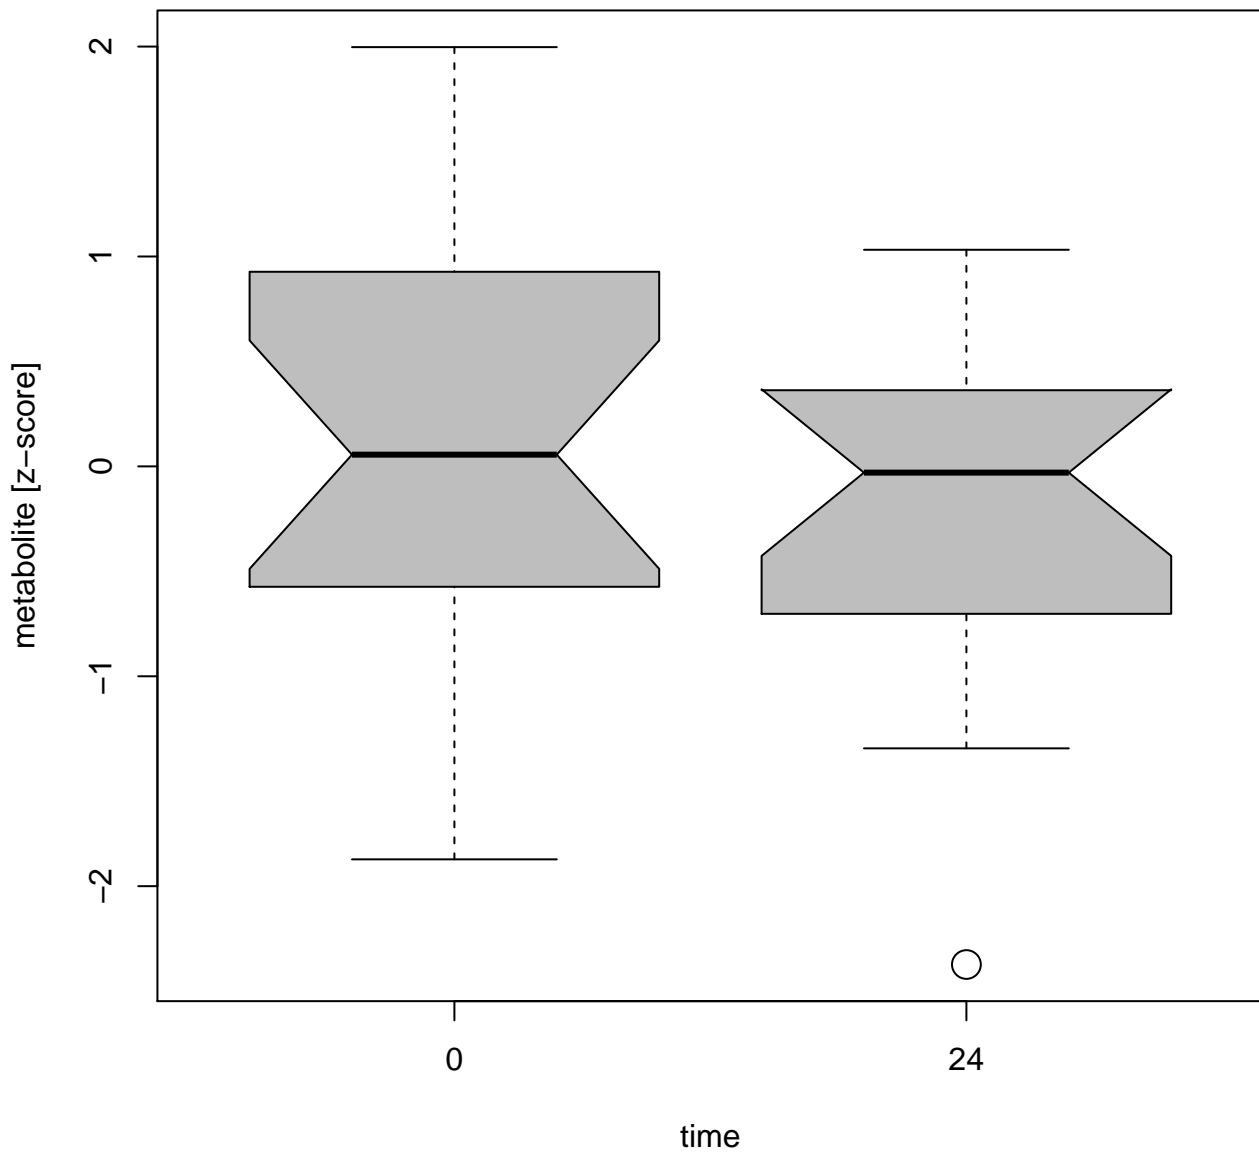

**glutathione, oxidized (GSSG)**

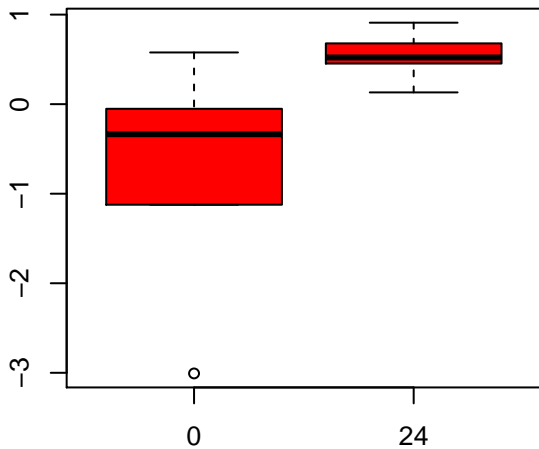

HCT116

**glutathione, oxidized (GSSG)**

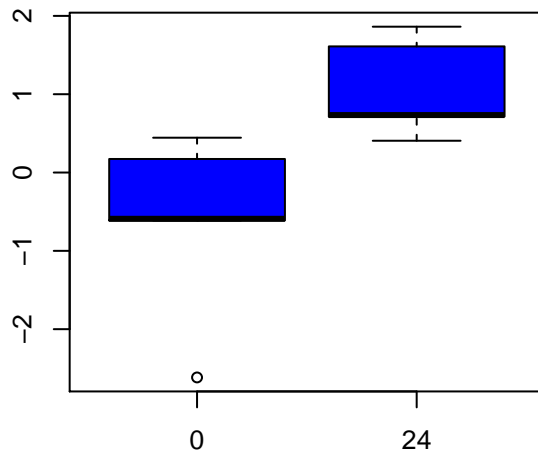

OVCAR

**glutathione, oxidized (GSSG)**

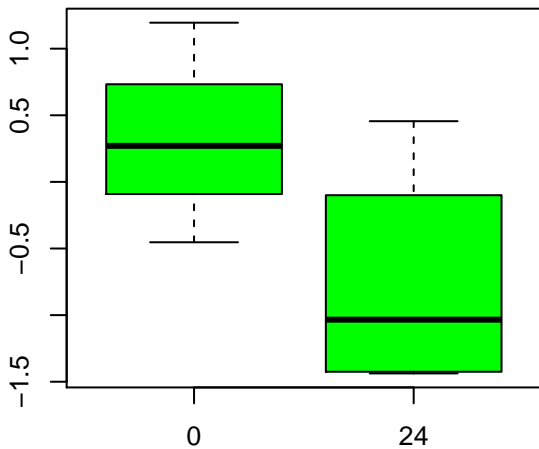

HCT15

**glutathione, oxidized (GSSG)**

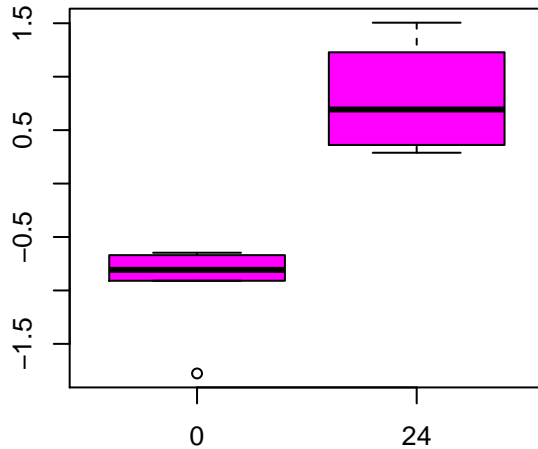

SKOV3

# glutathione, oxidized (GSSG)

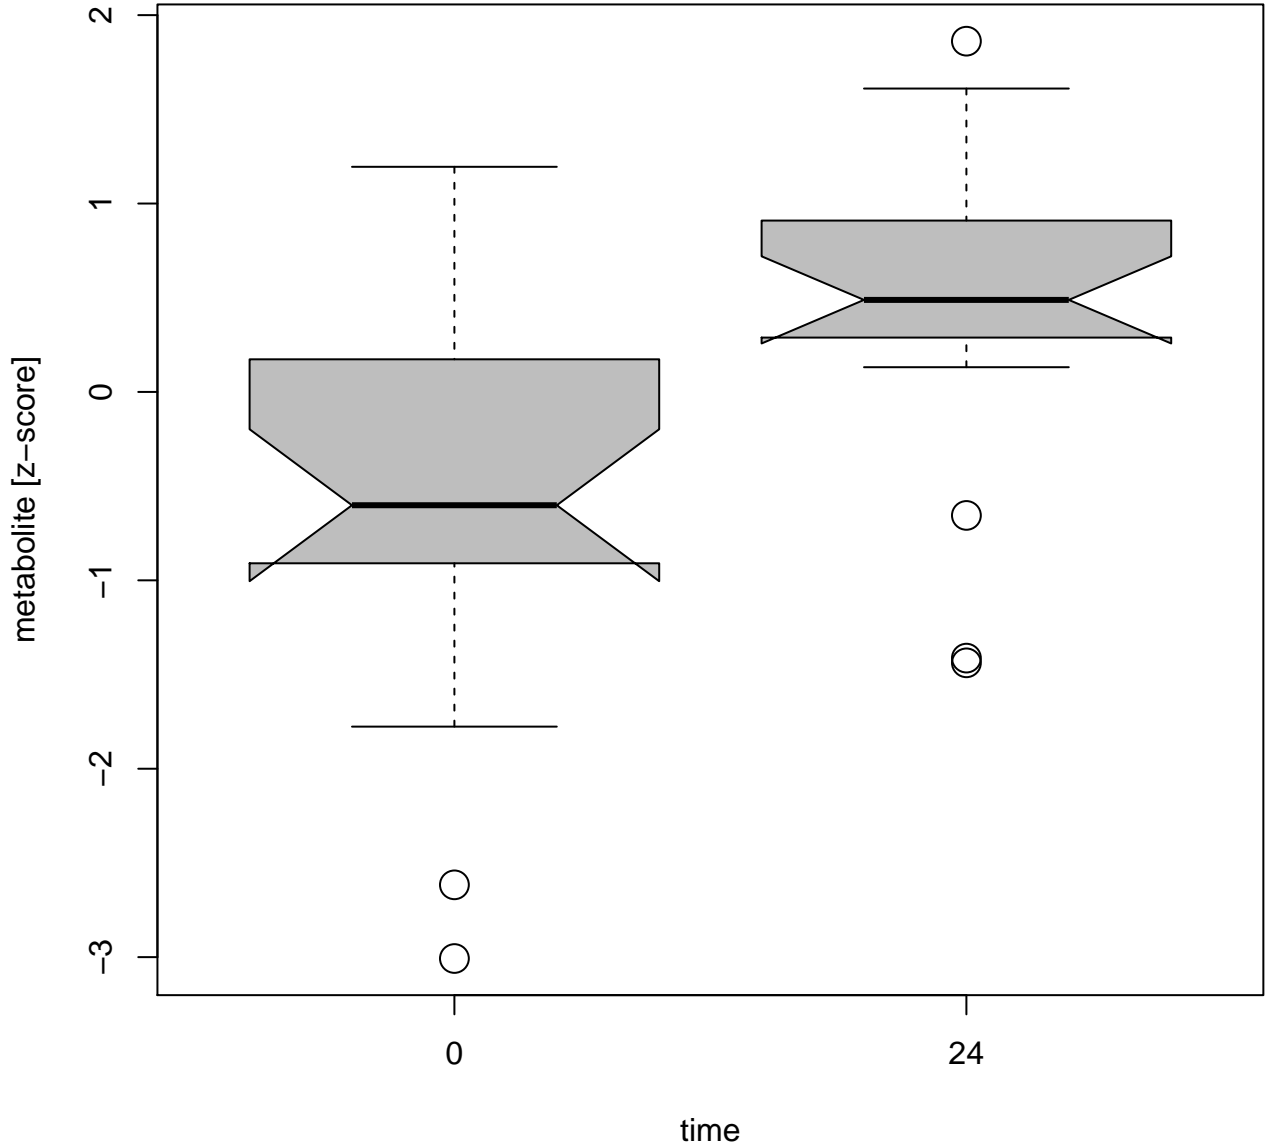

**glutathione, reduced (GSH)**

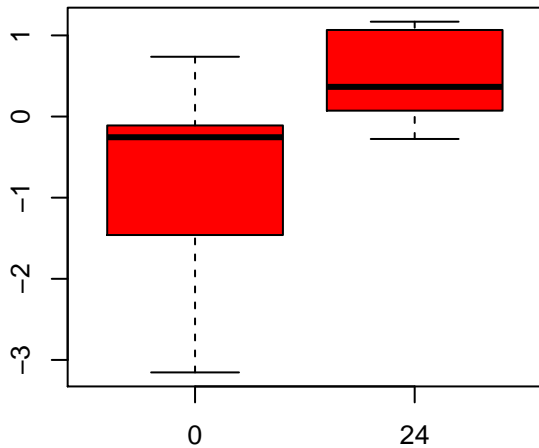

HCT116

**glutathione, reduced (GSH)**

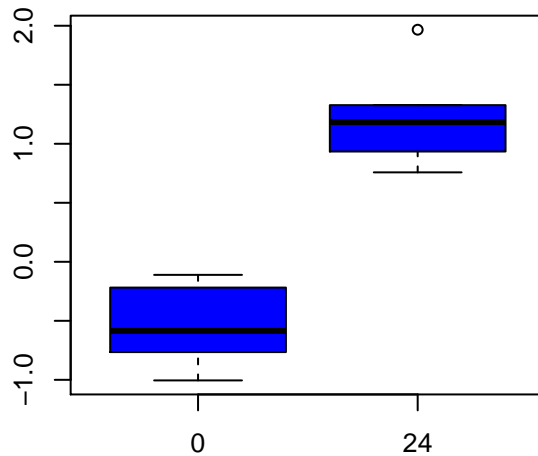

OVCAR

**glutathione, reduced (GSH)**

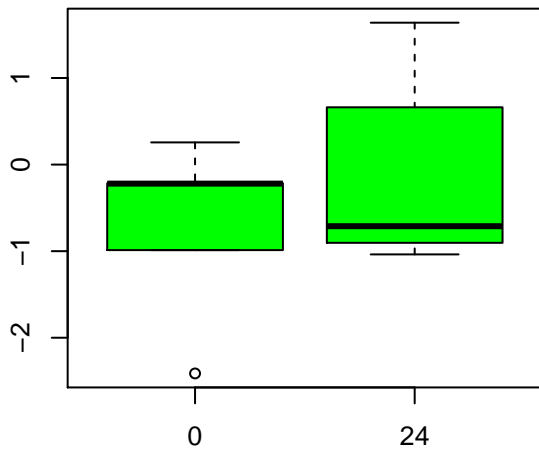

HCT15

**glutathione, reduced (GSH)**

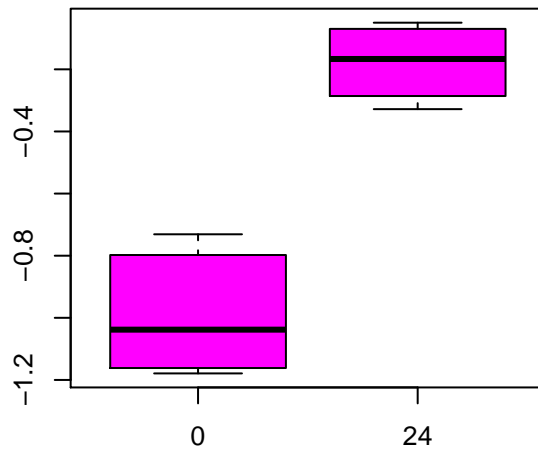

SKOV3

# glutathione, reduced (GSH)

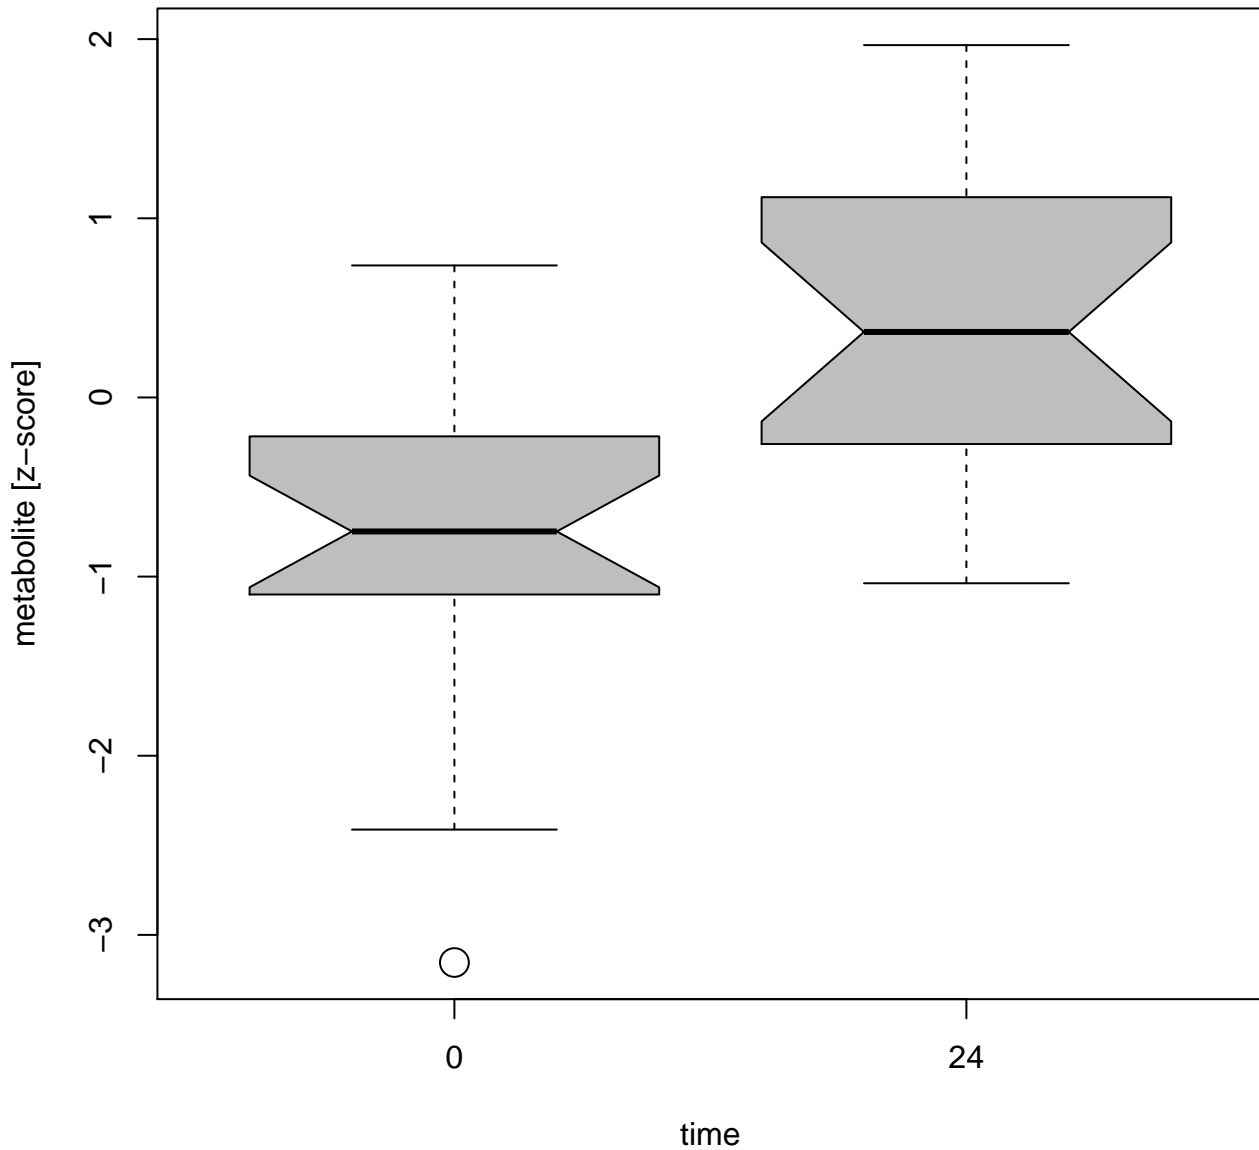

**glycerol**

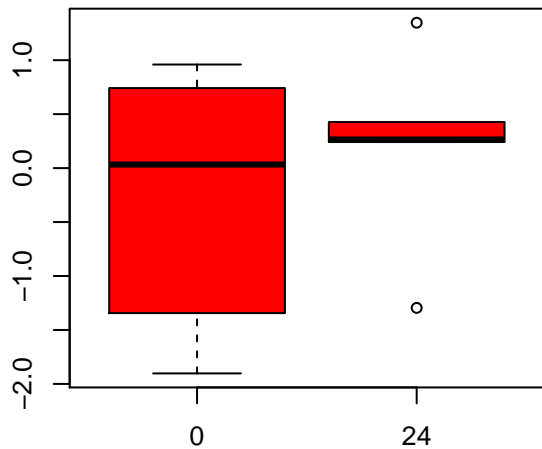

HCT116

**glycerol**

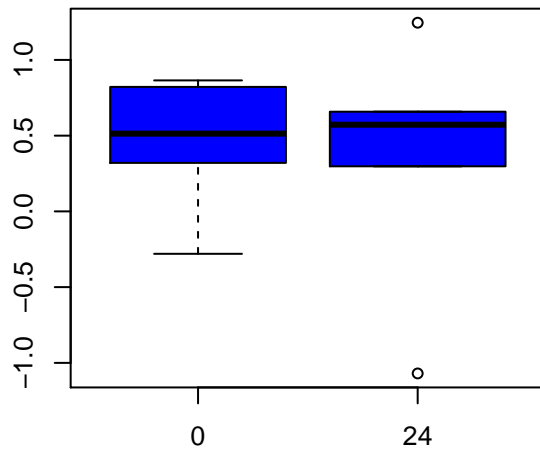

OVCAR

**glycerol**

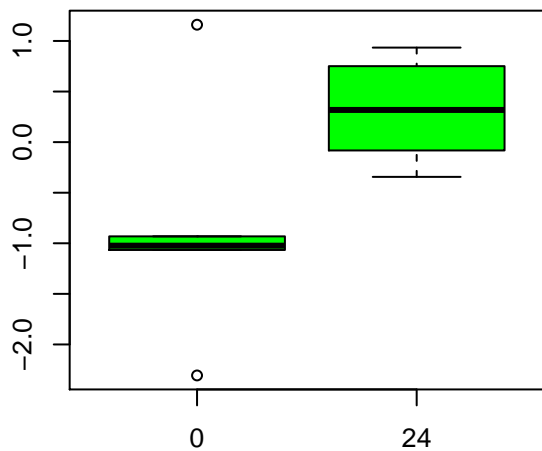

HCT15

**glycerol**

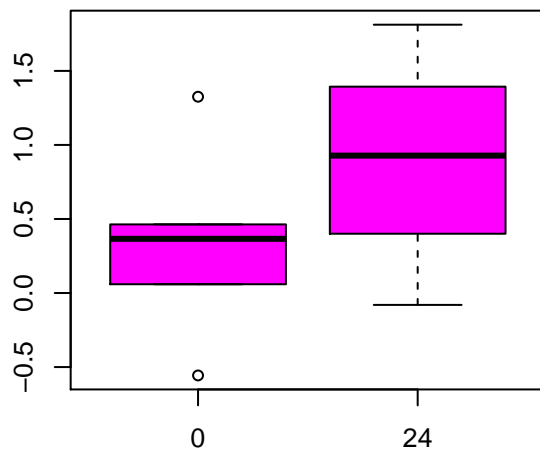

SKOV3

# glycerol

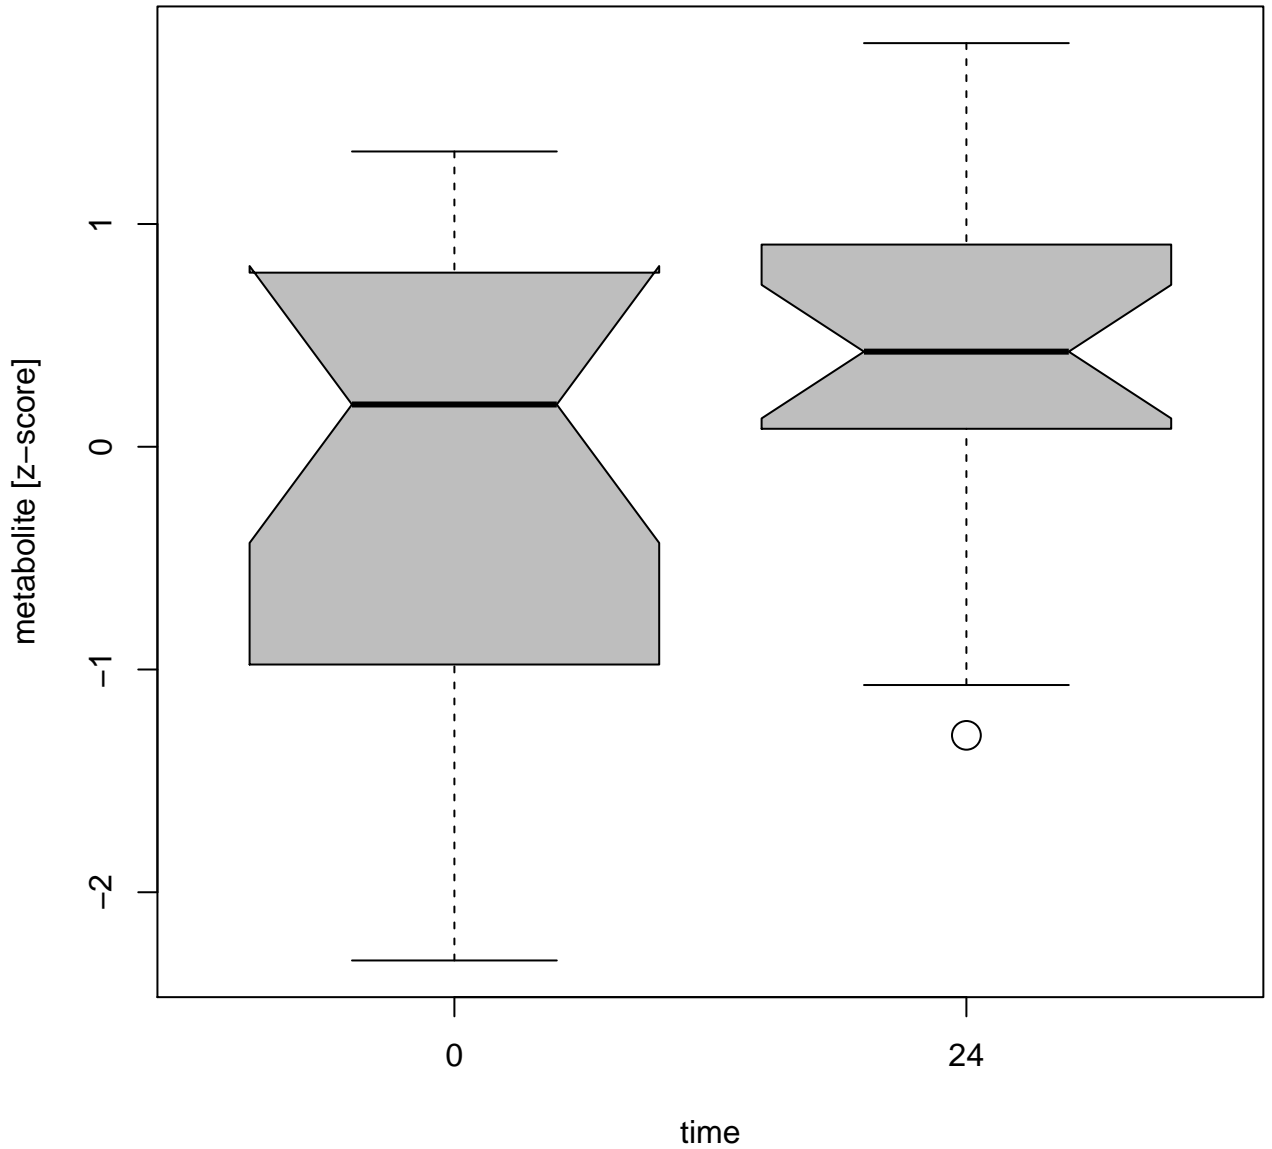

**glycerol 3-phosphate (G3P)**

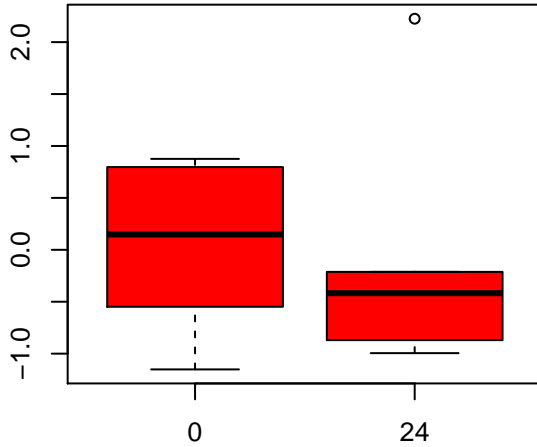

HCT116

**glycerol 3-phosphate (G3P)**

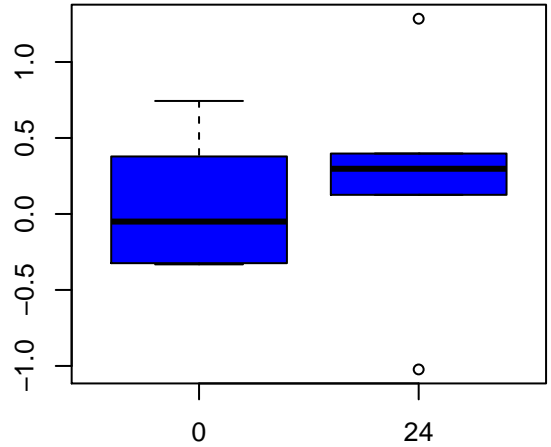

OVCAR

**glycerol 3-phosphate (G3P)**

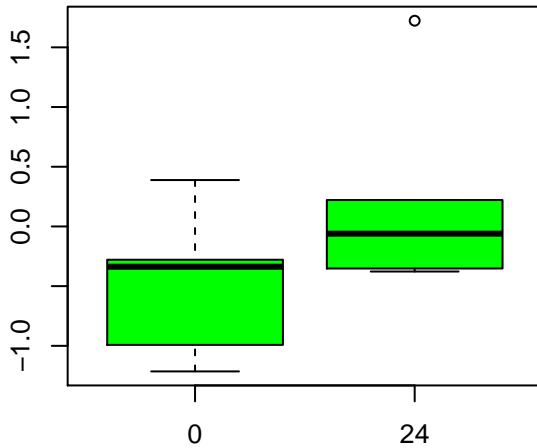

HCT15

**glycerol 3-phosphate (G3P)**

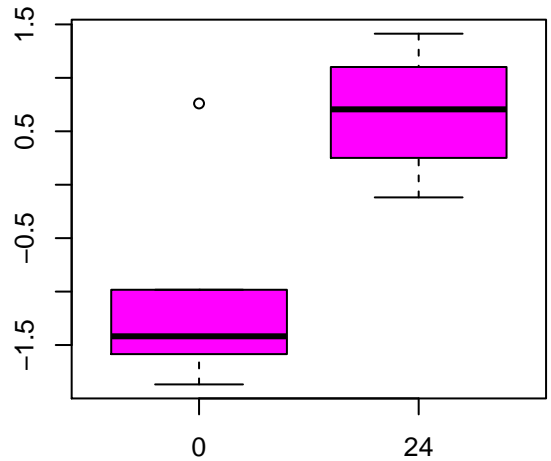

SKOV3



# glycerol 3-phosphate (G3P)

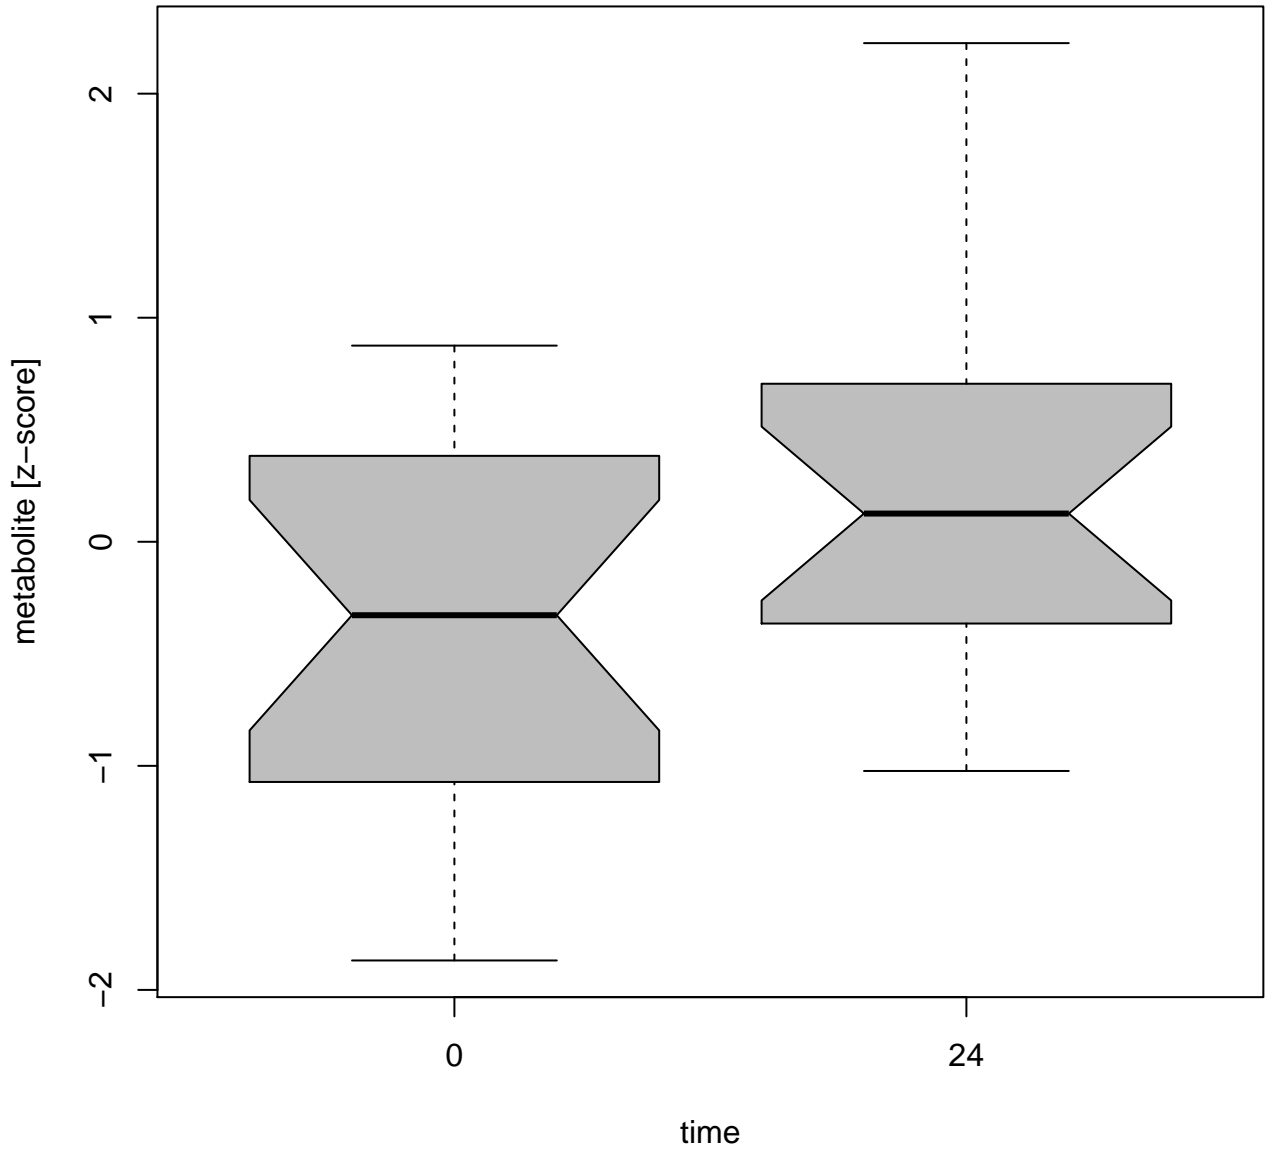

**glycerophosphoethanolamine**

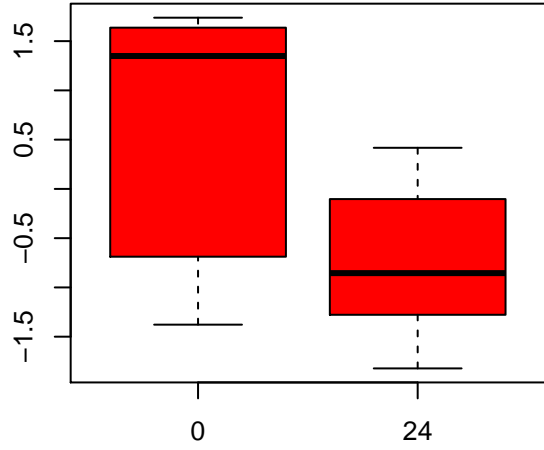

HCT116

**glycerophosphoethanolamine**

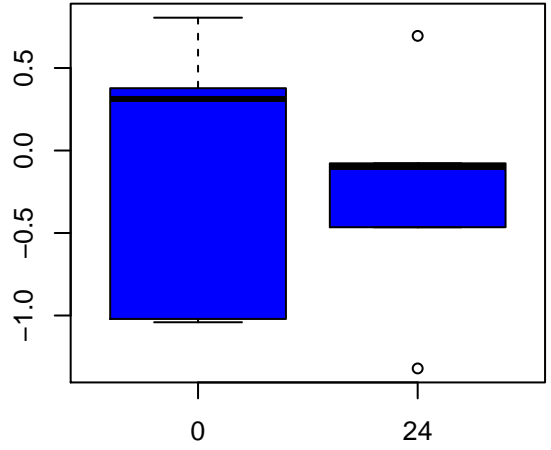

OVCAR

**glycerophosphoethanolamine**

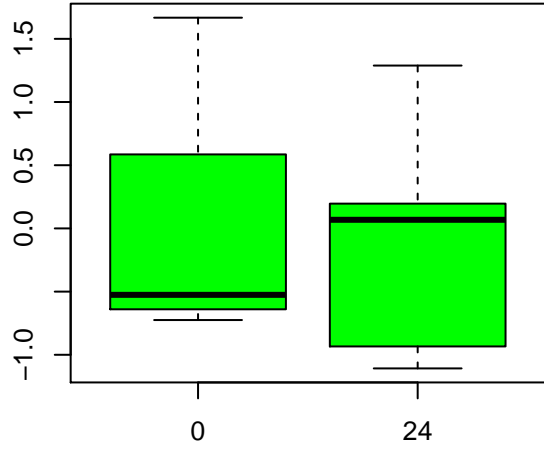

HCT15

**glycerophosphoethanolamine**

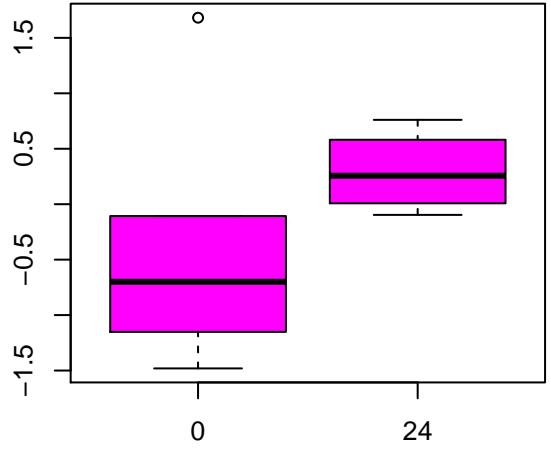

SKOV3

# glycerophosphoethanolamine

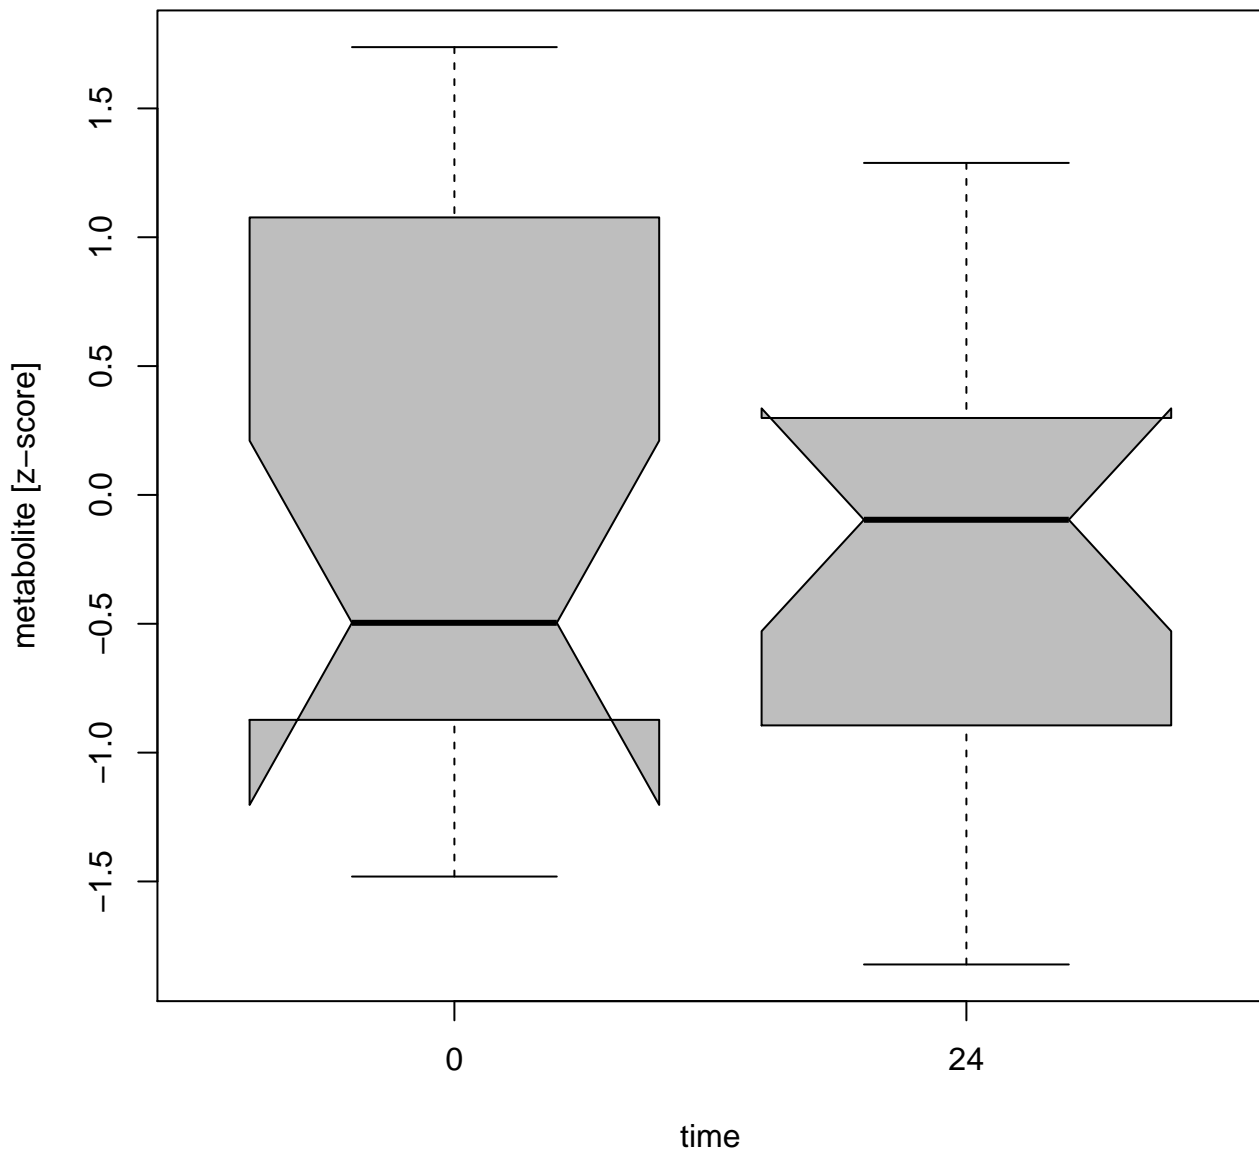

**glycerophosphorylcholine (GPC)**

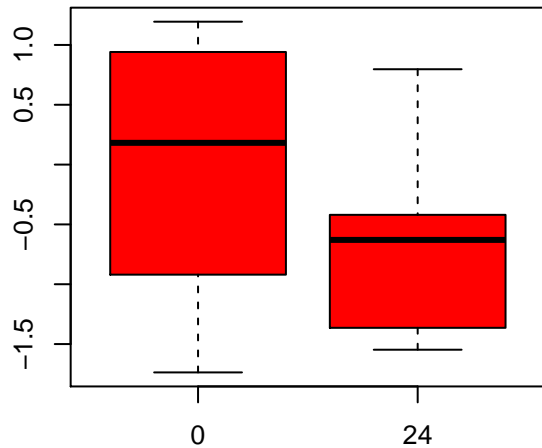

HCT116

**glycerophosphorylcholine (GPC)**

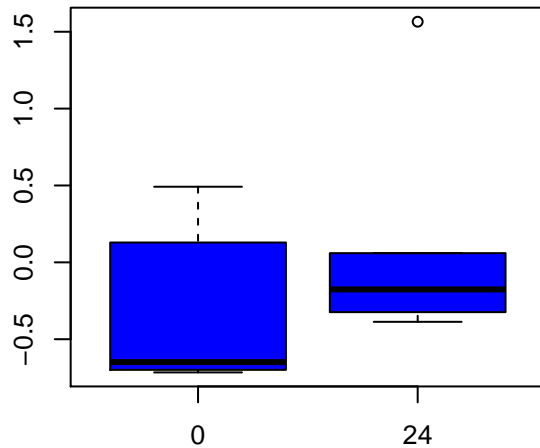

OVCAR

**glycerophosphorylcholine (GPC)**

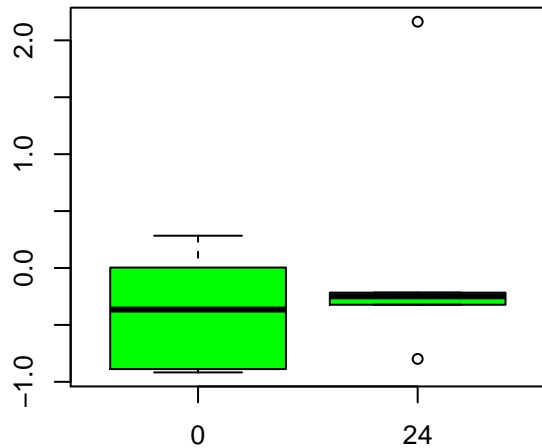

HCT15

**glycerophosphorylcholine (GPC)**

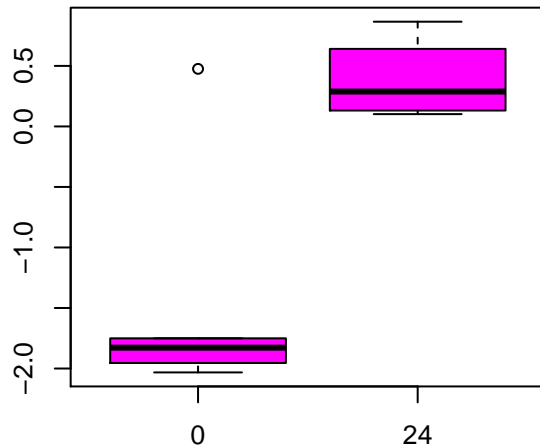

SKOV3

# glycerophosphorylcholine (GPC)

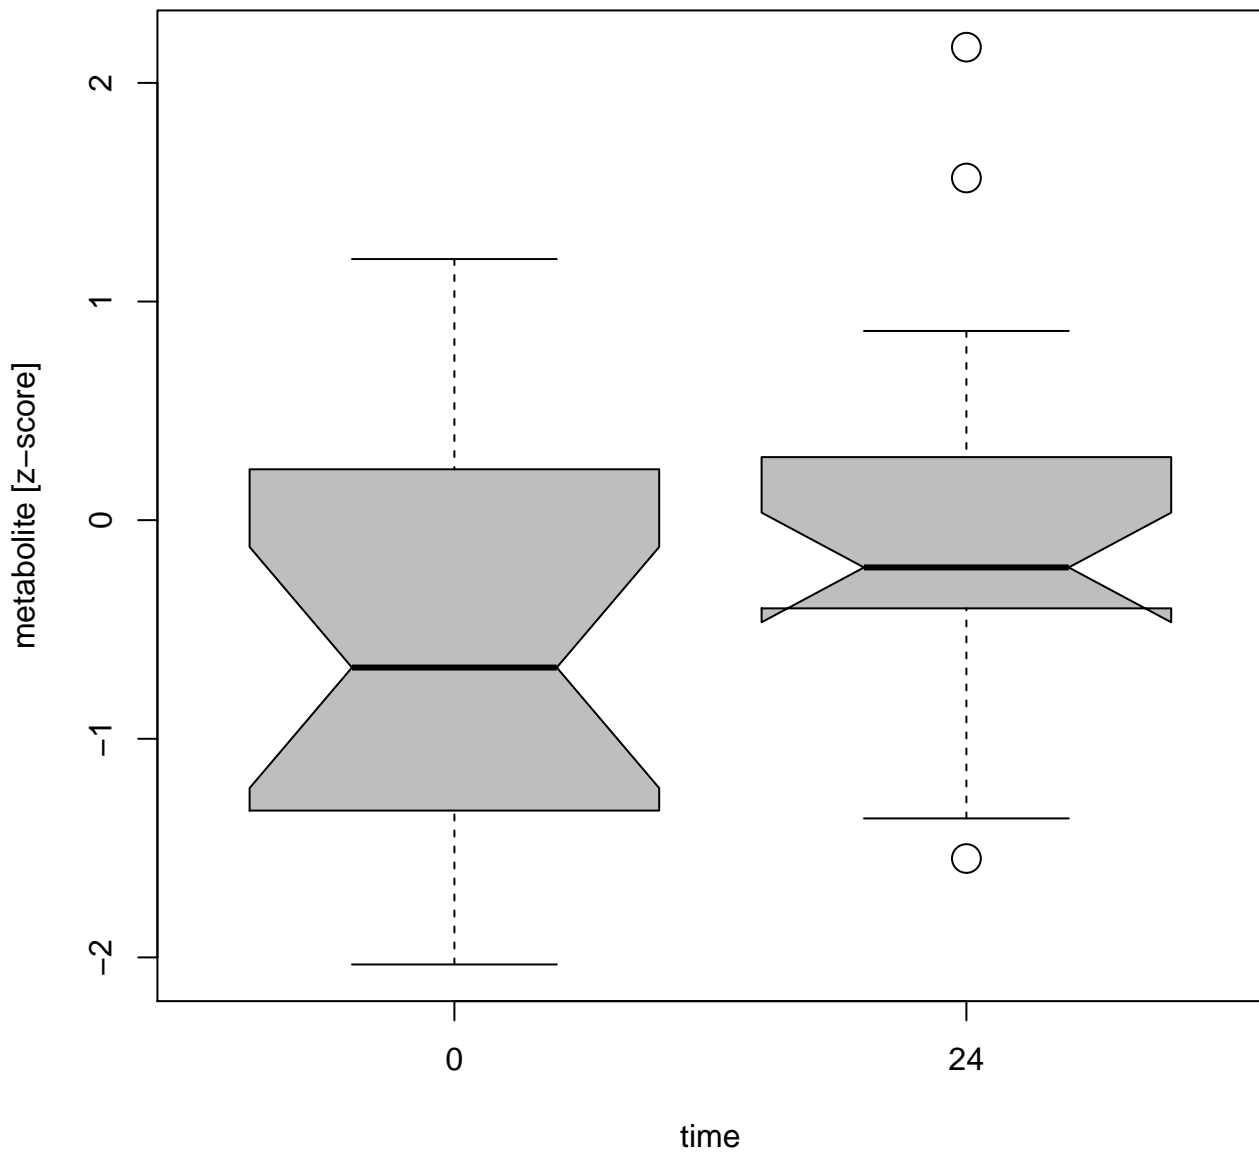

**glycine**

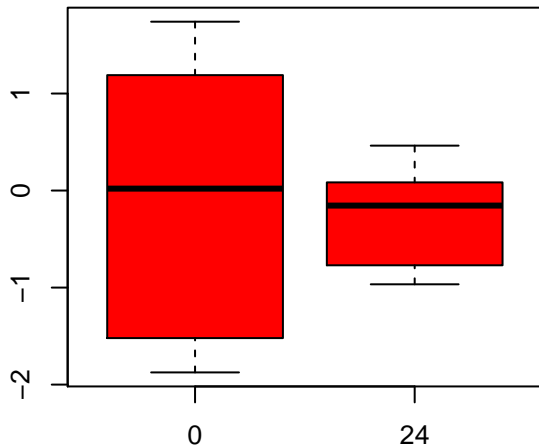

HCT116

**glycine**

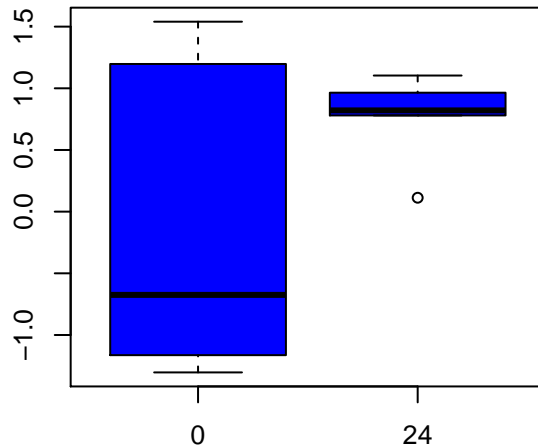

OVCAR

**glycine**

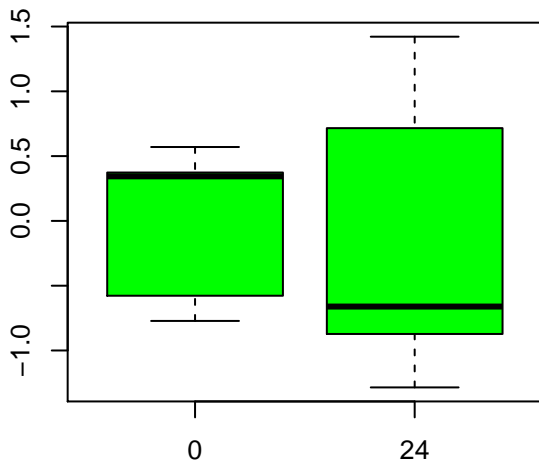

HCT15

**glycine**

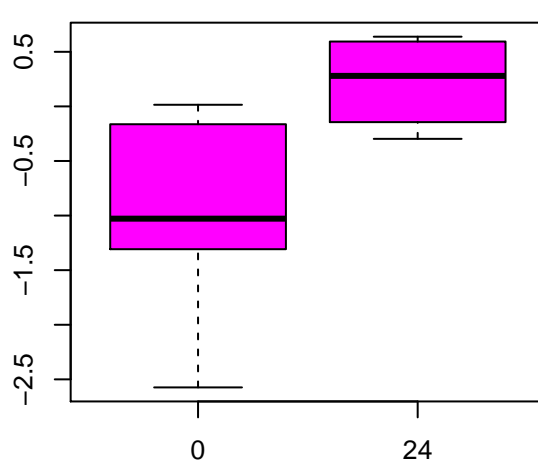

SKOV3

# glycine

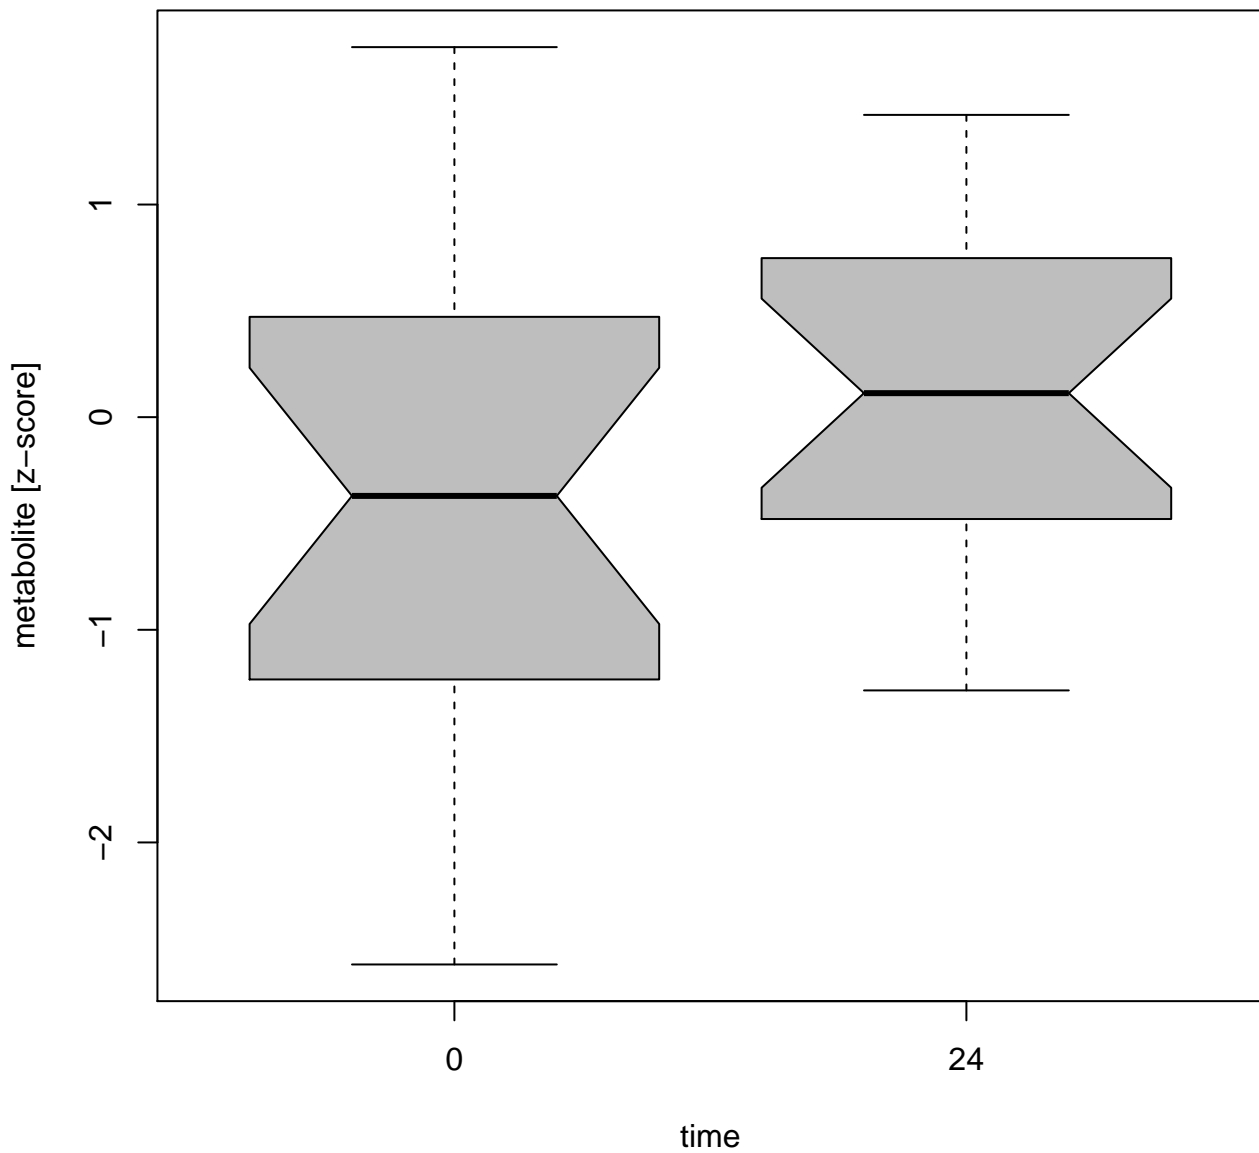

guanosine 5'- diphosphate (GDP)

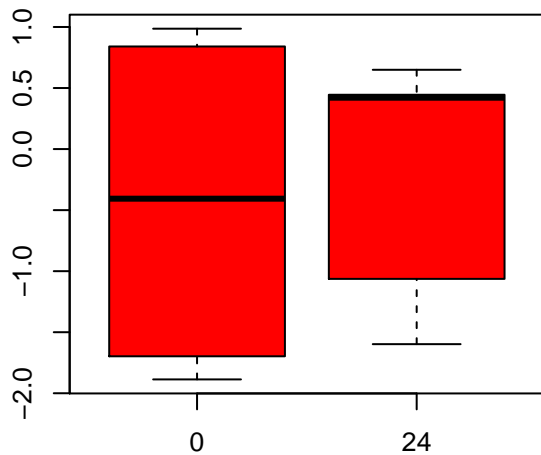

HCT116

guanosine 5'- diphosphate (GDP)

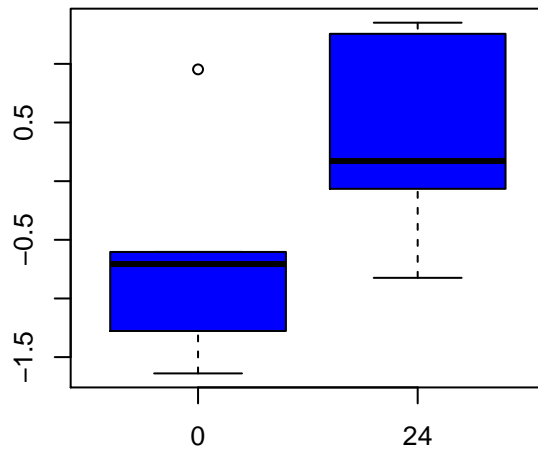

OVCAR

guanosine 5'- diphosphate (GDP)

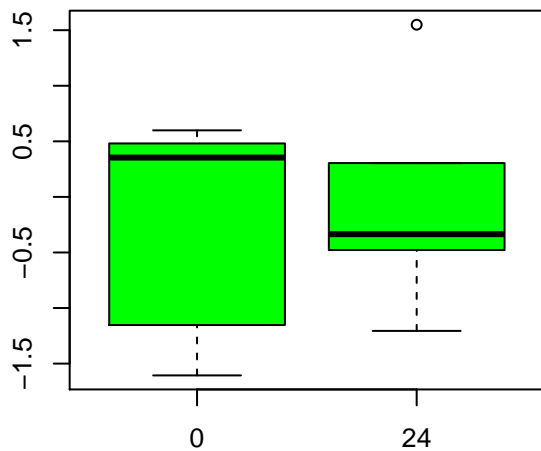

HCT15

guanosine 5'- diphosphate (GDP)

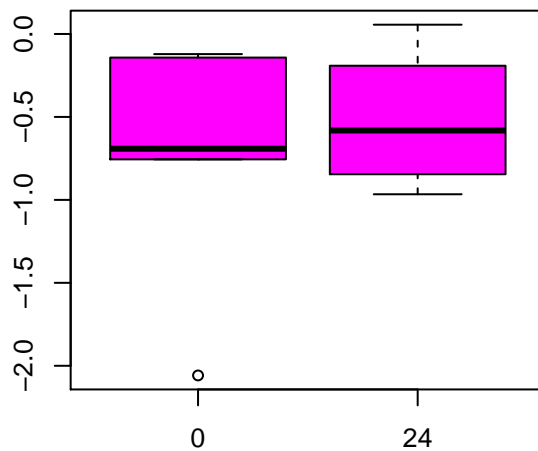

SKOV3



# guanosine 5'- diphosphate (GDP)

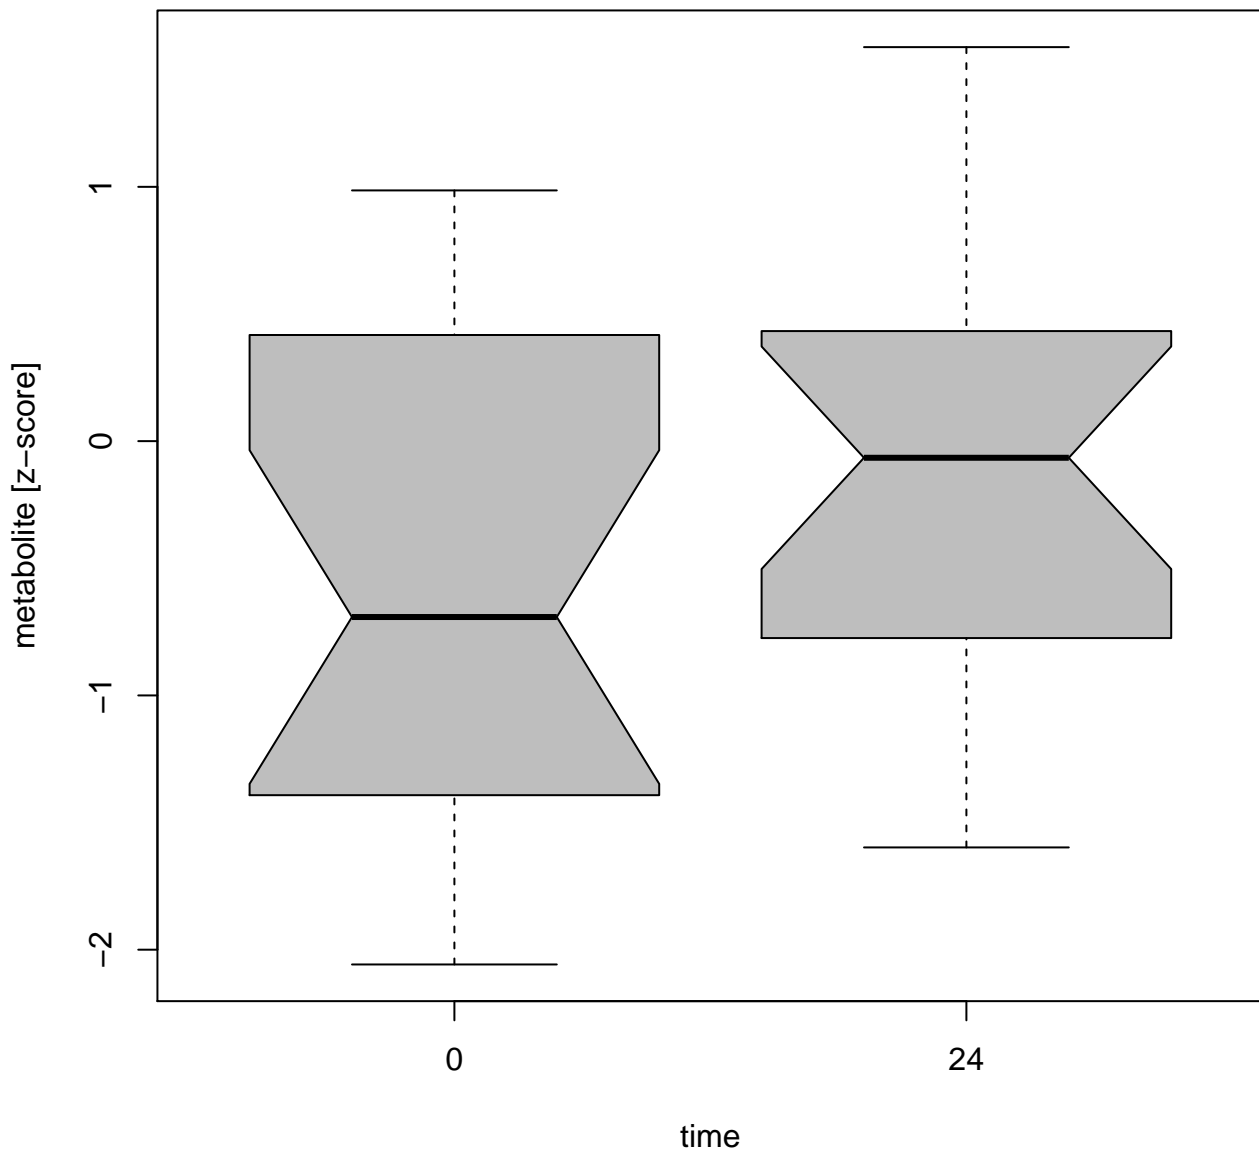

guanosine 5'- monophosphate (5'-GMP)

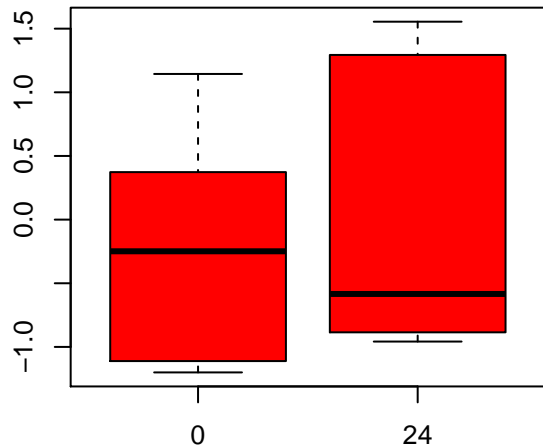

HCT116

guanosine 5'- monophosphate (5'-GMP)

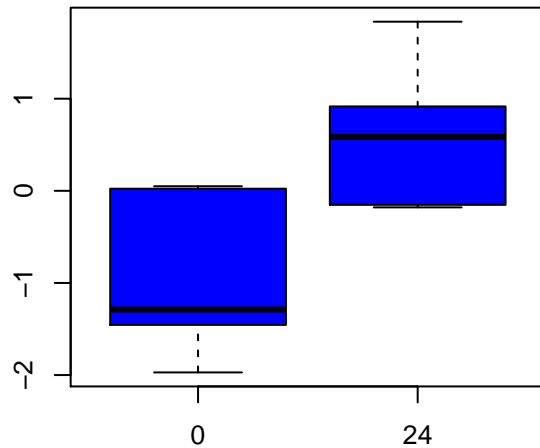

OVCAR

guanosine 5'- monophosphate (5'-GMP)

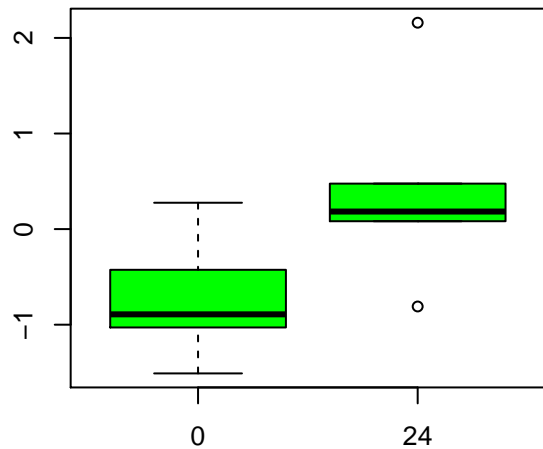

HCT15

guanosine 5'- monophosphate (5'-GMP)

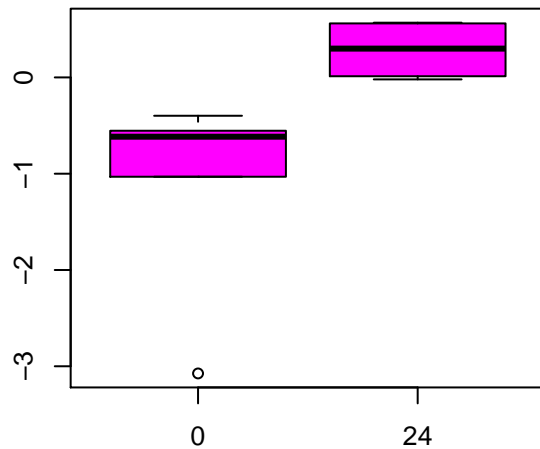

SKOV3

# guanosine 5'- monophosphate (5'-GMP)

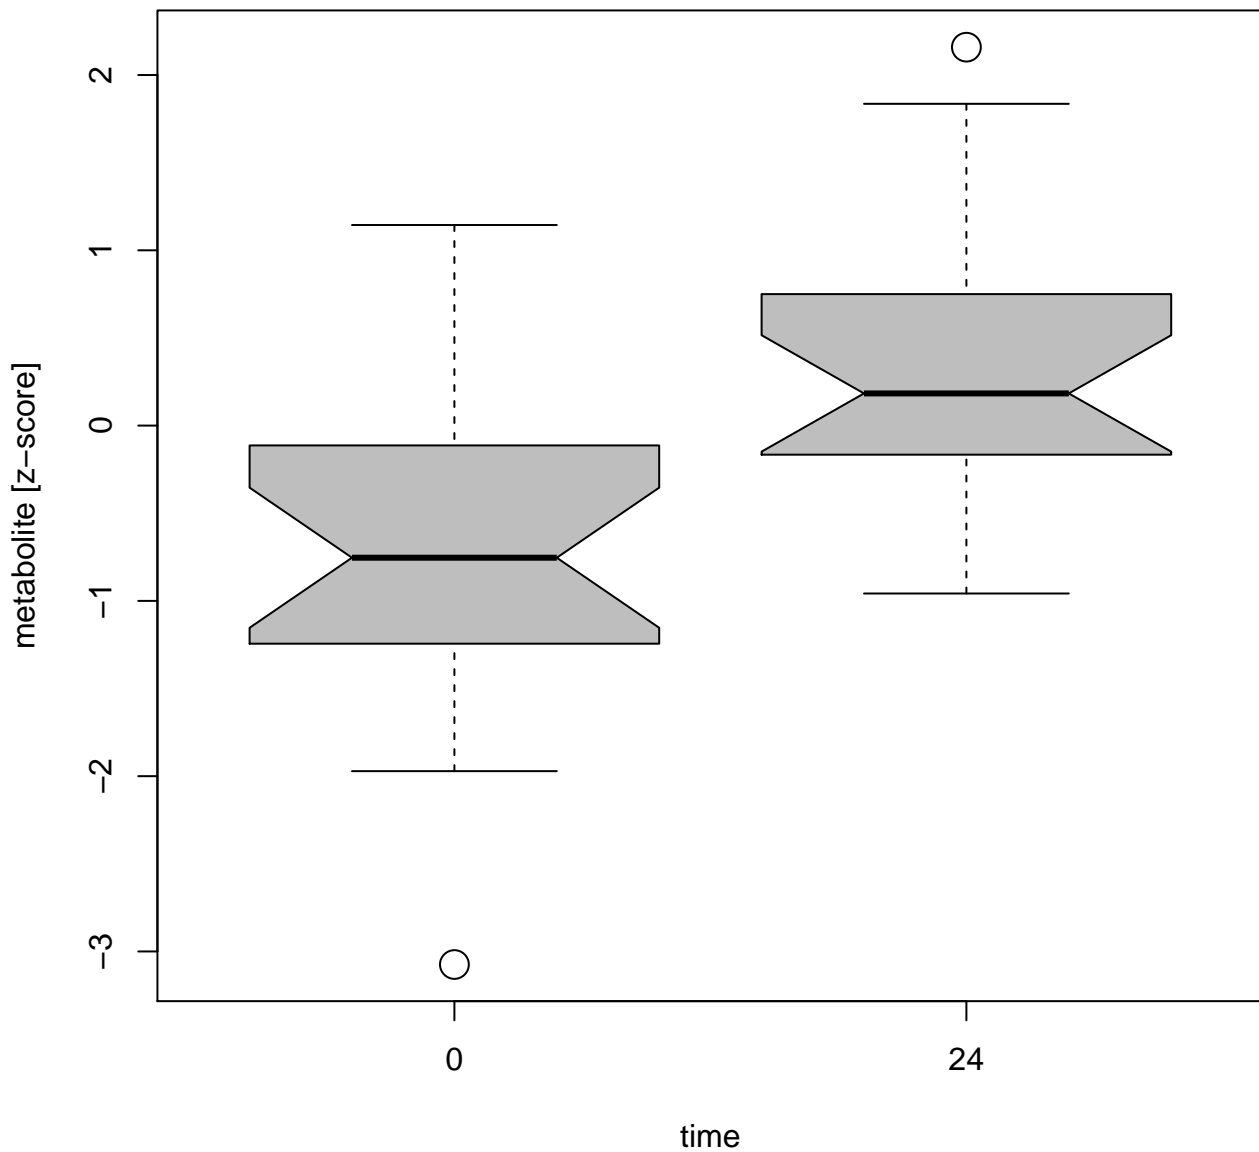

histidine

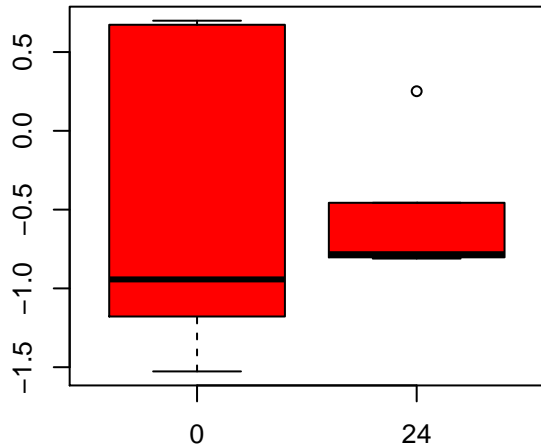

HCT116

histidine

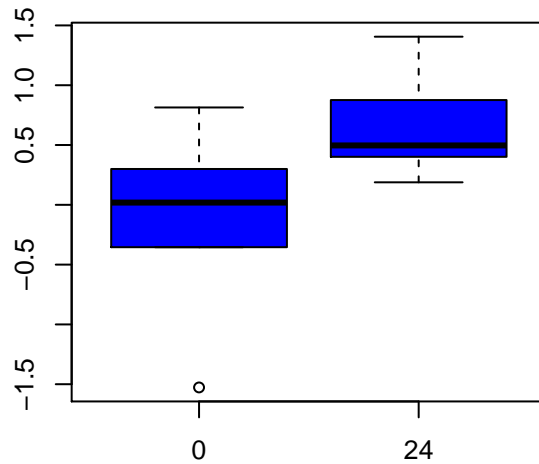

OVCAR

histidine

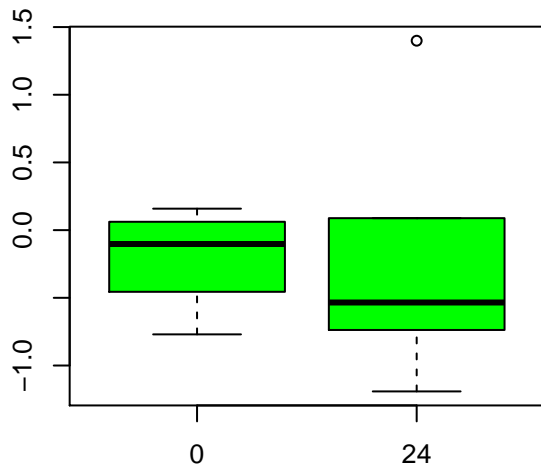

HCT15

histidine

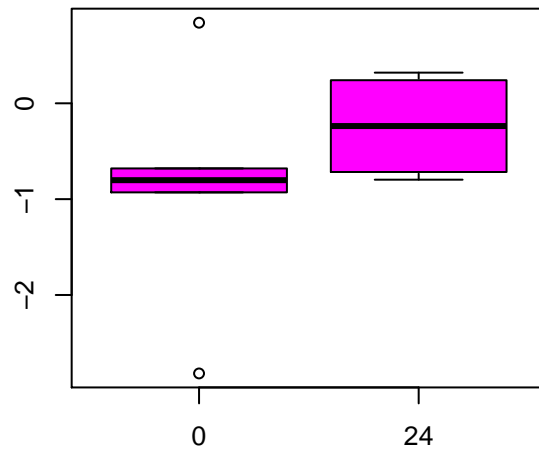

SKOV3

# histidine

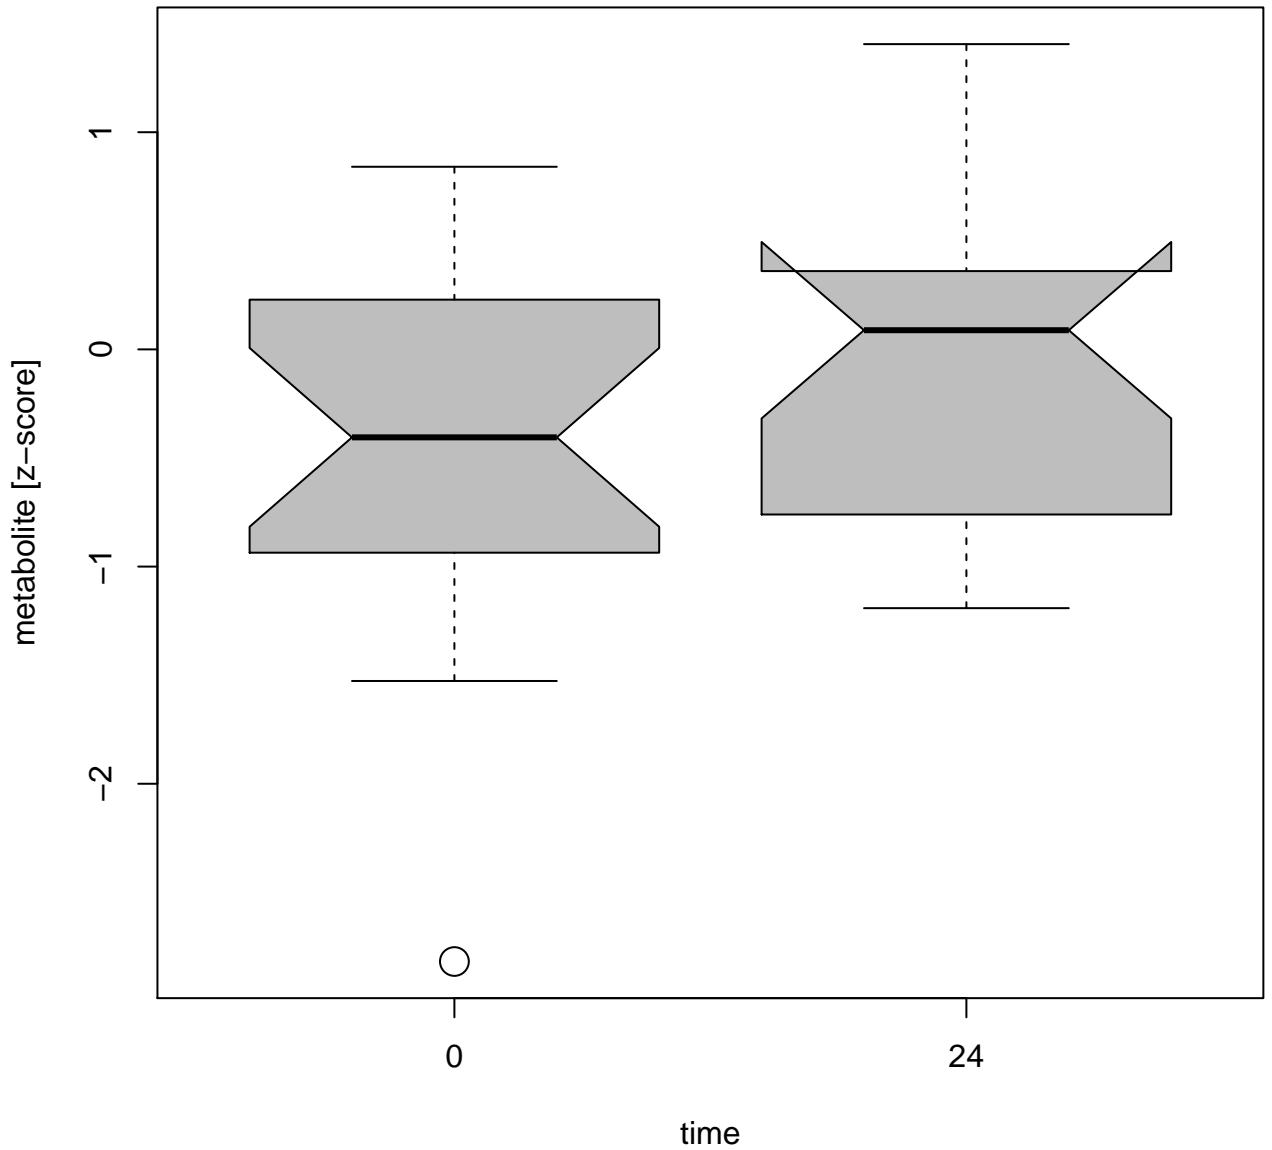

**hypoxanthine**

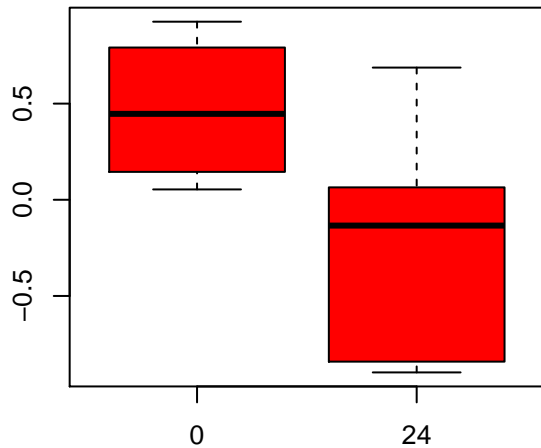

HCT116

**hypoxanthine**

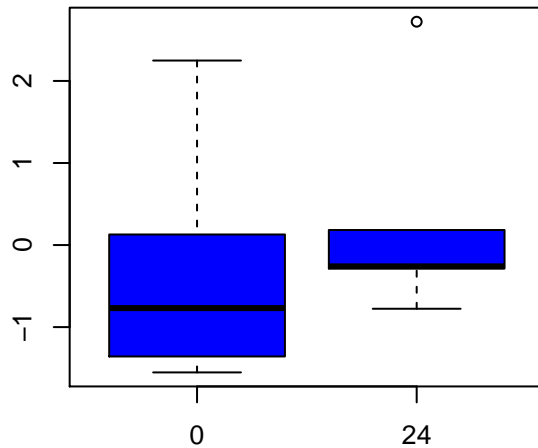

OVCAR

**hypoxanthine**

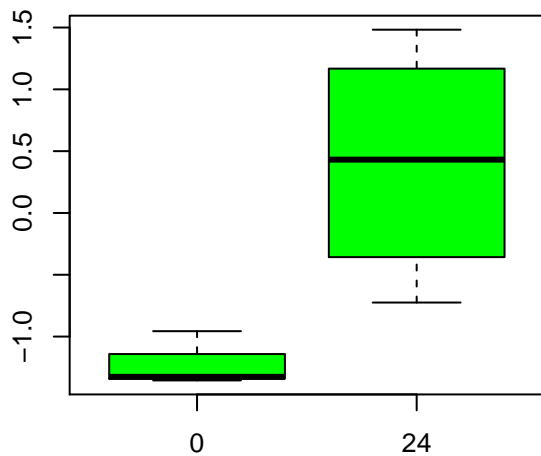

HCT15

**hypoxanthine**

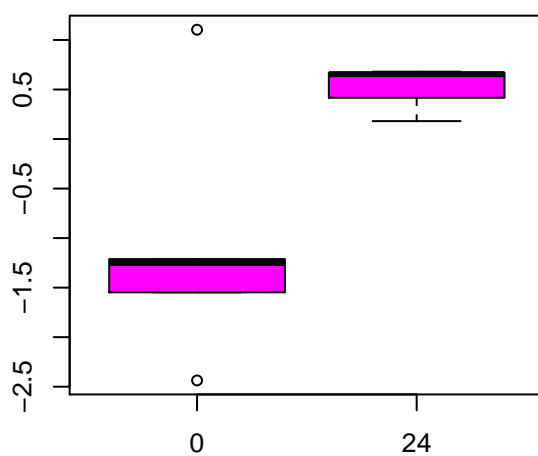

SKOV3

# hypoxanthine

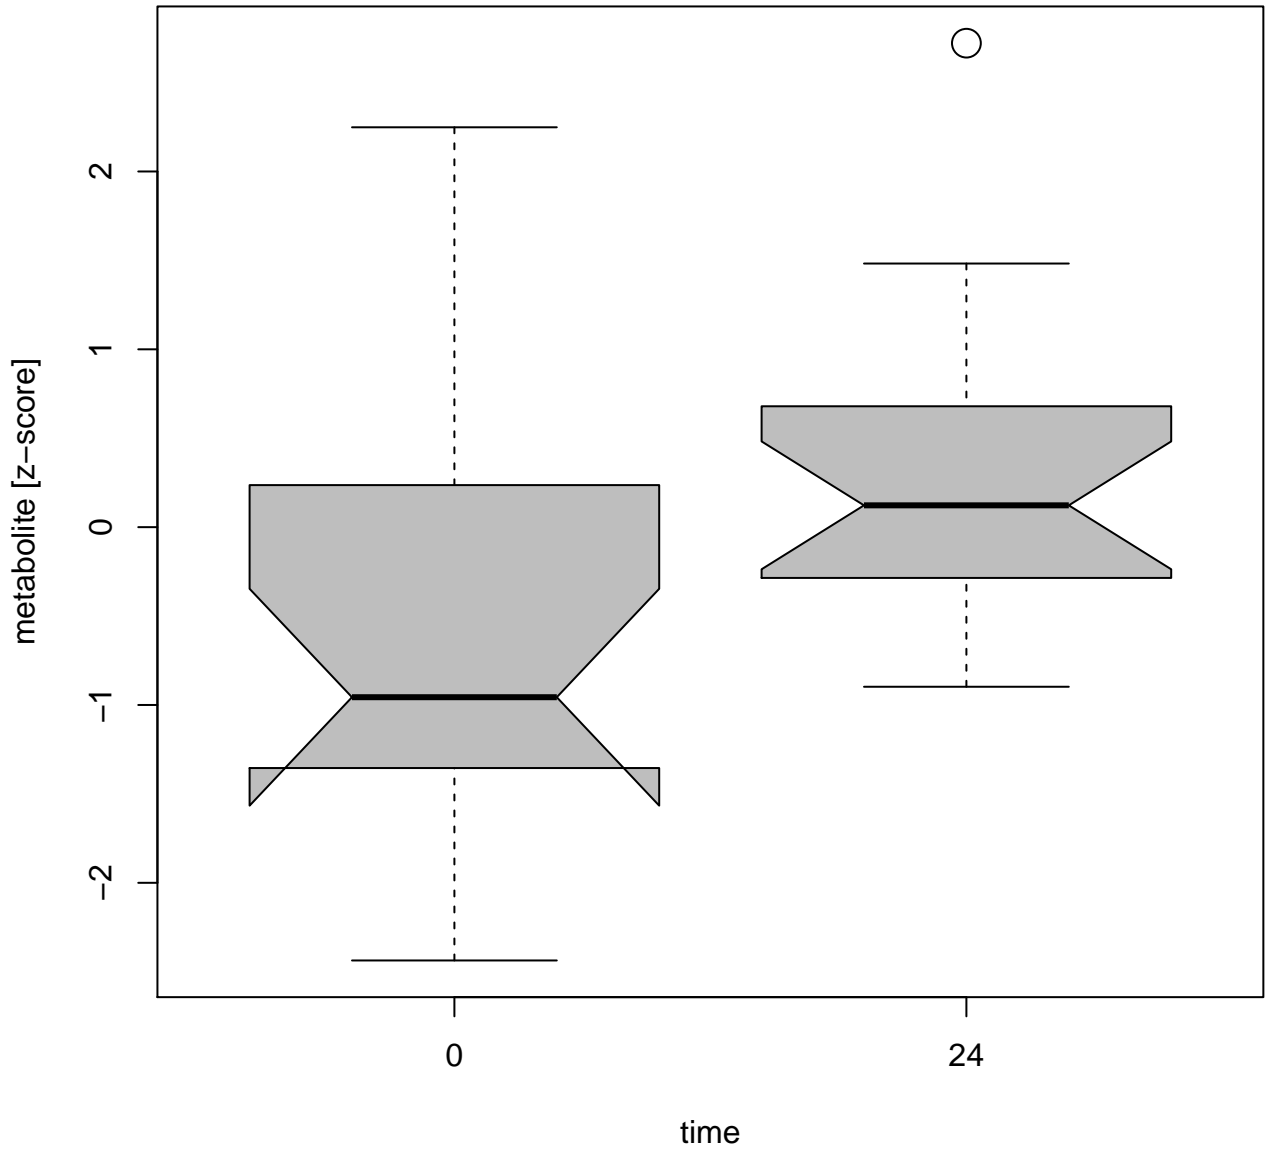

**inosine**

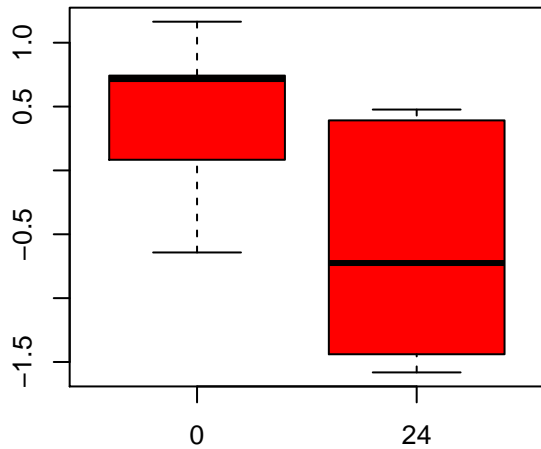

HCT116

**inosine**

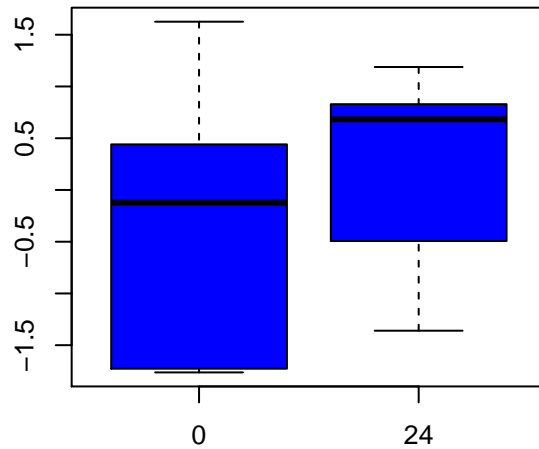

OVCAR

**inosine**

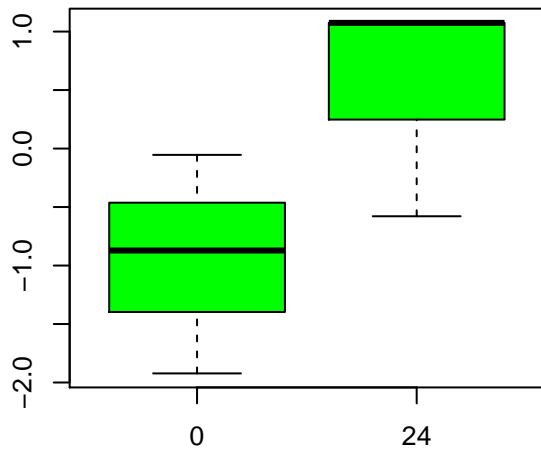

HCT15

**inosine**

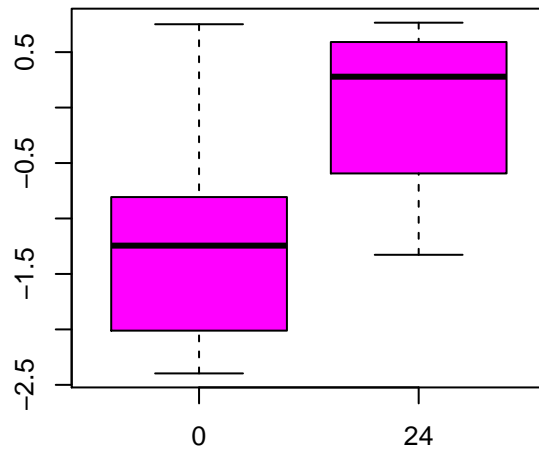

SKOV3



# inosine

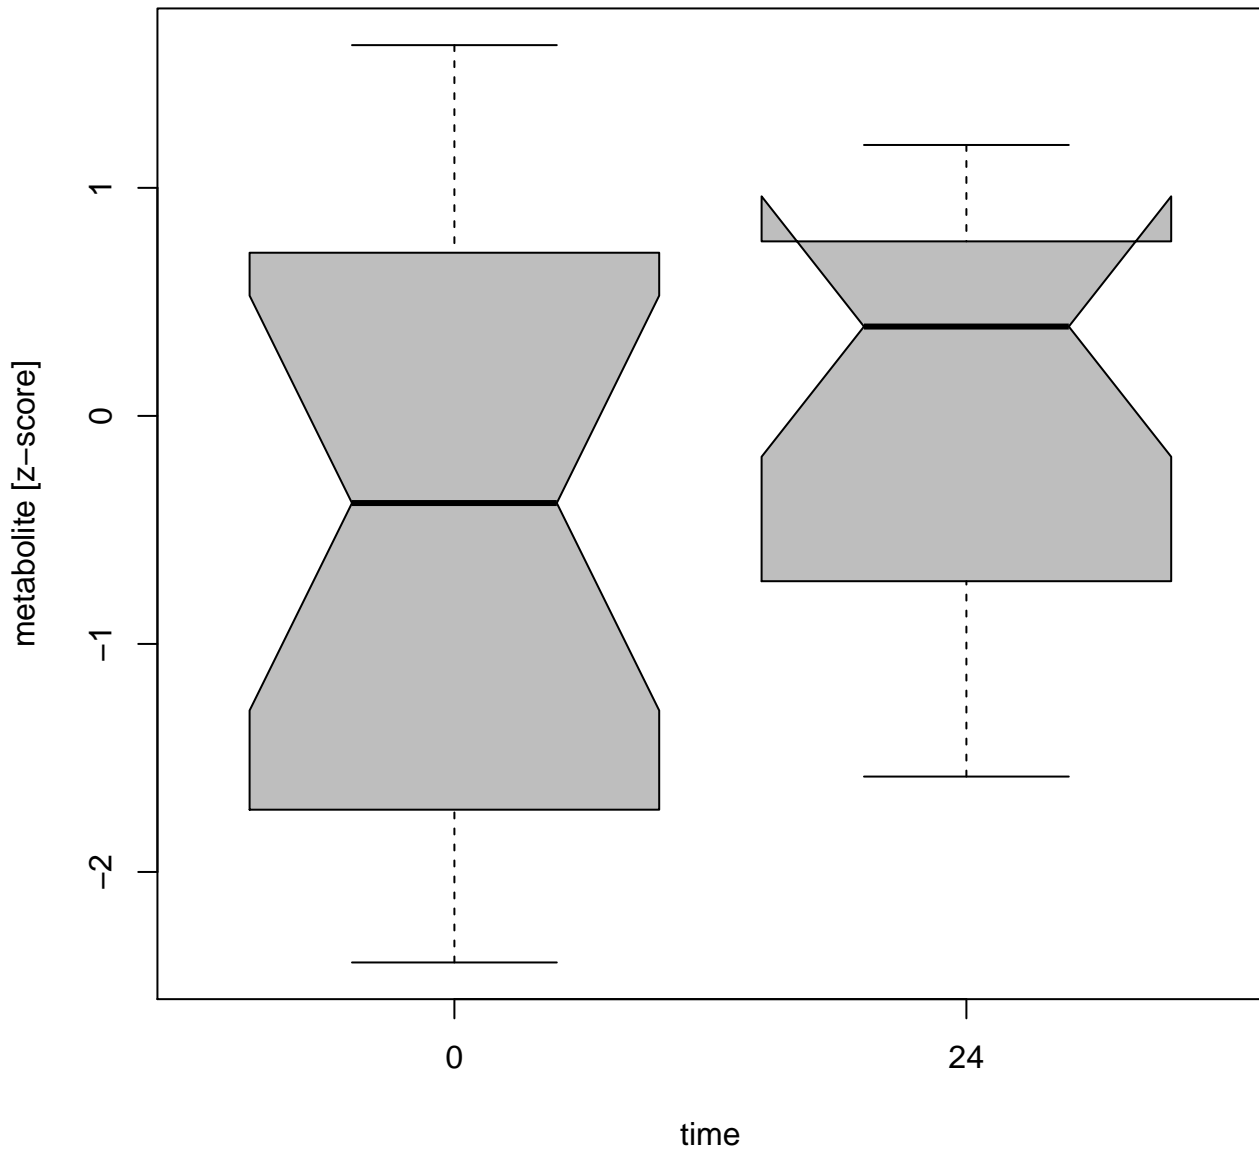

**inosine 5'-monophosphate (IMP)**

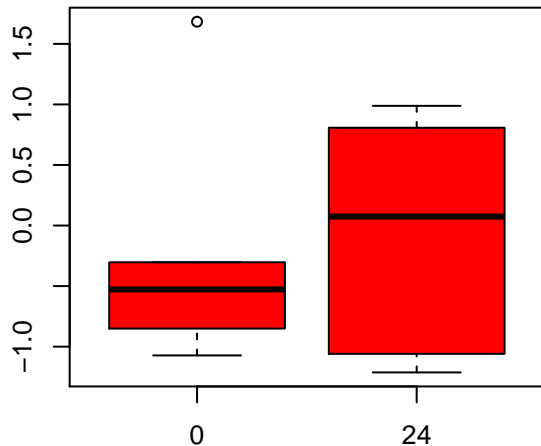

HCT116

**inosine 5'-monophosphate (IMP)**

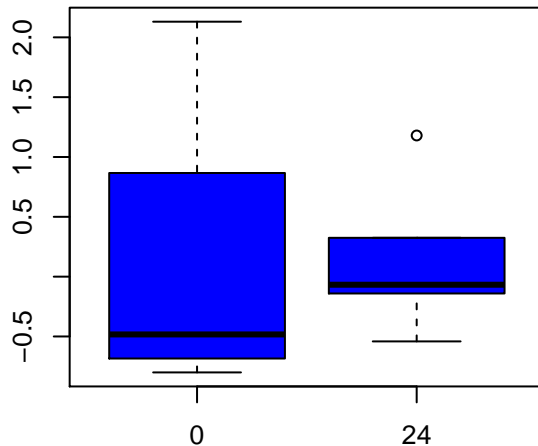

OVCAR

**inosine 5'-monophosphate (IMP)**

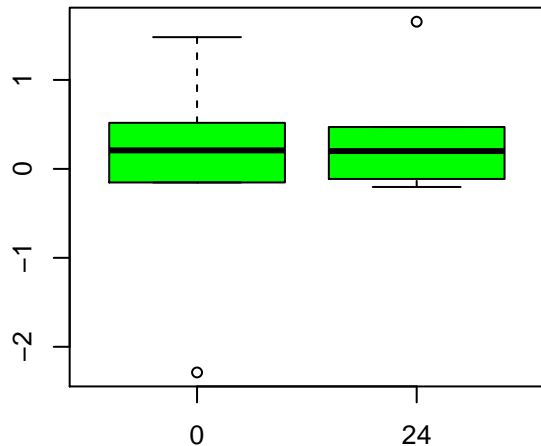

HCT15

**inosine 5'-monophosphate (IMP)**

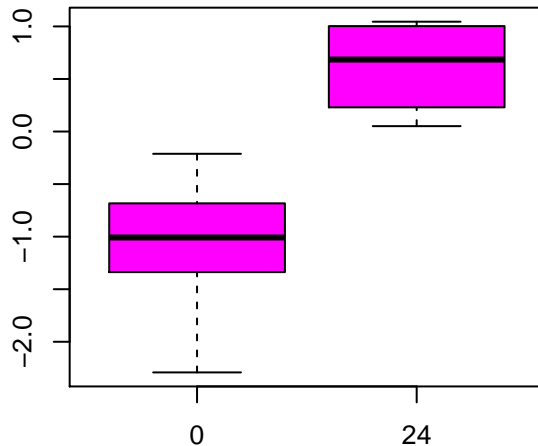

SKOV3

# inosine 5'-monophosphate (IMP)

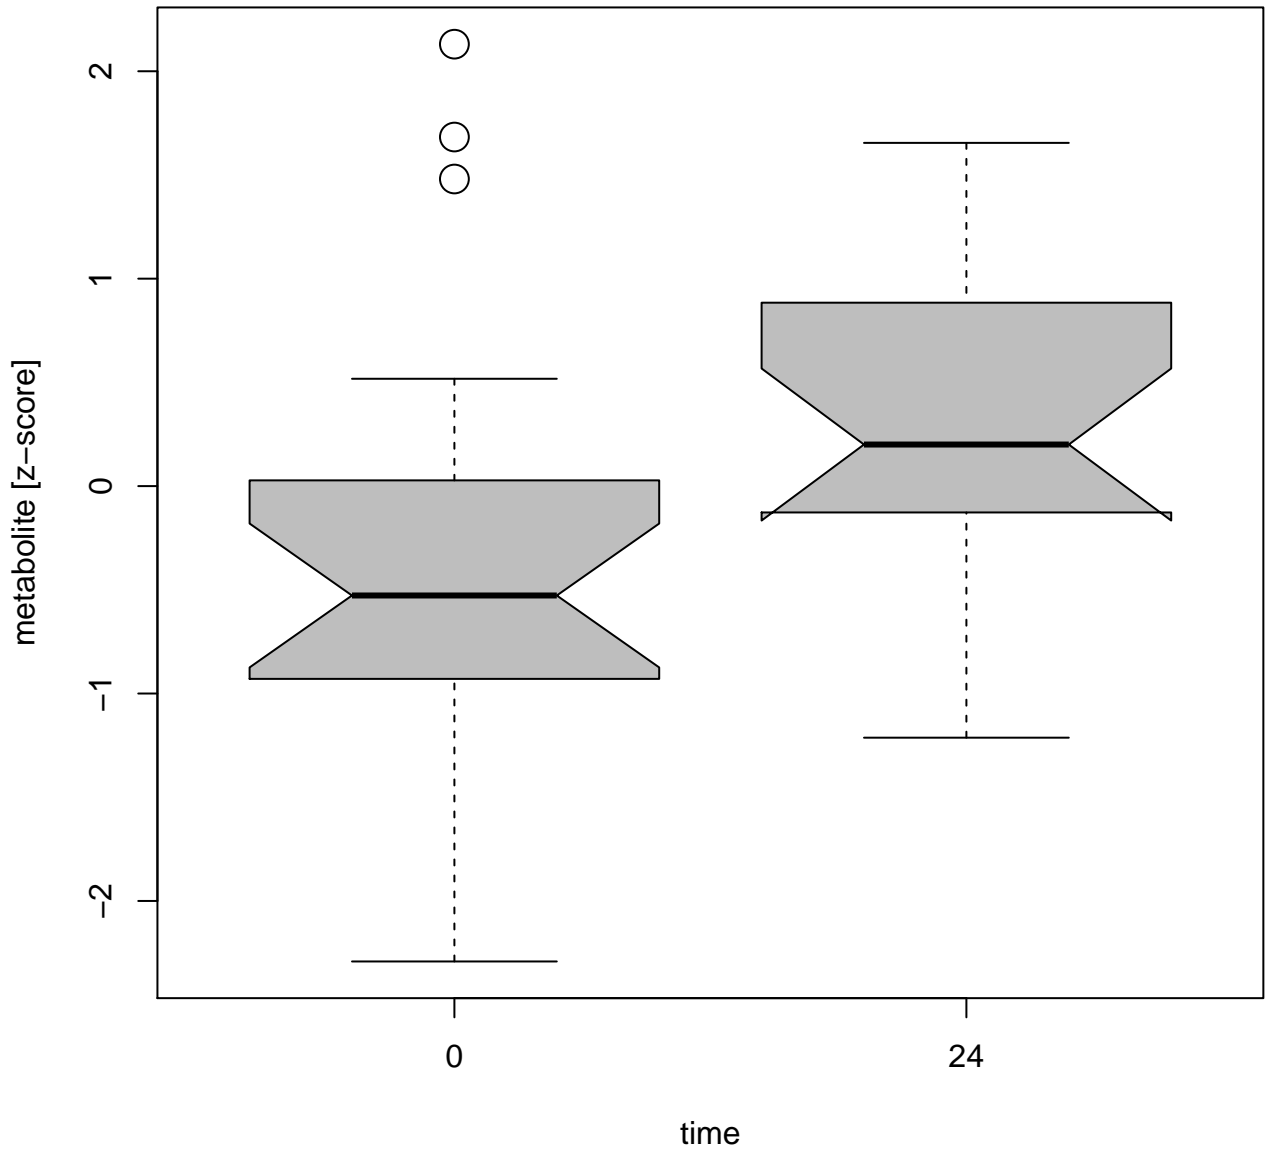

**inositol 1-phosphate (I1P)**

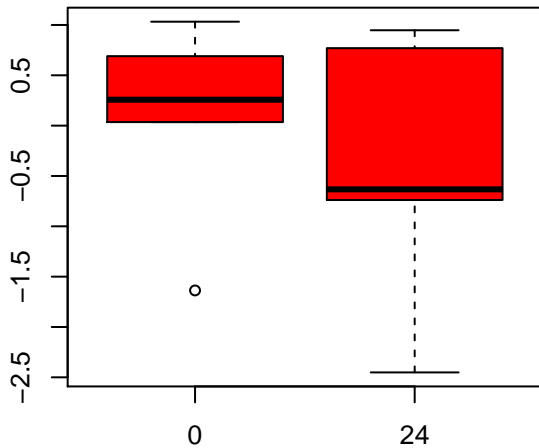

HCT116

**inositol 1-phosphate (I1P)**

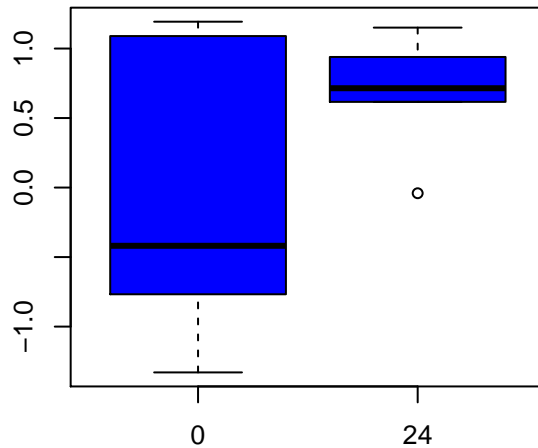

OVCAR

**inositol 1-phosphate (I1P)**

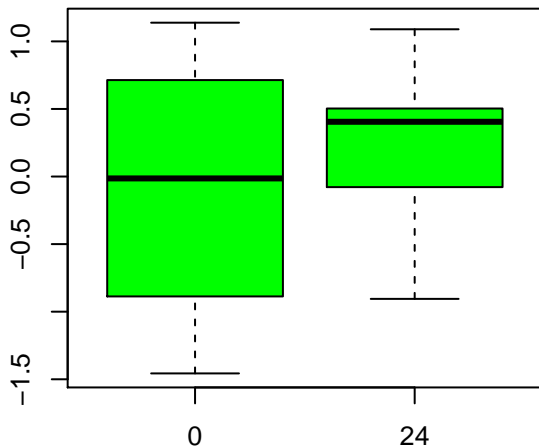

HCT15

**inositol 1-phosphate (I1P)**

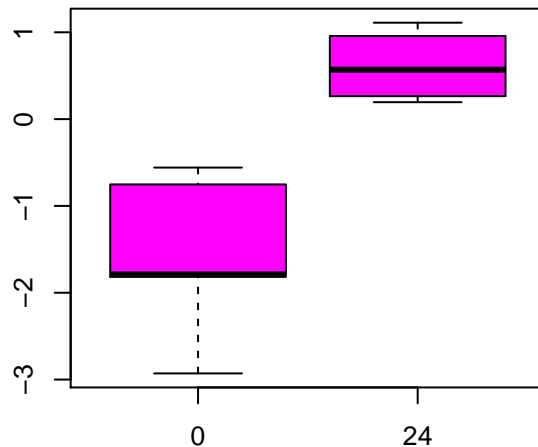

SKOV3

# inositol 1-phosphate (I1P)

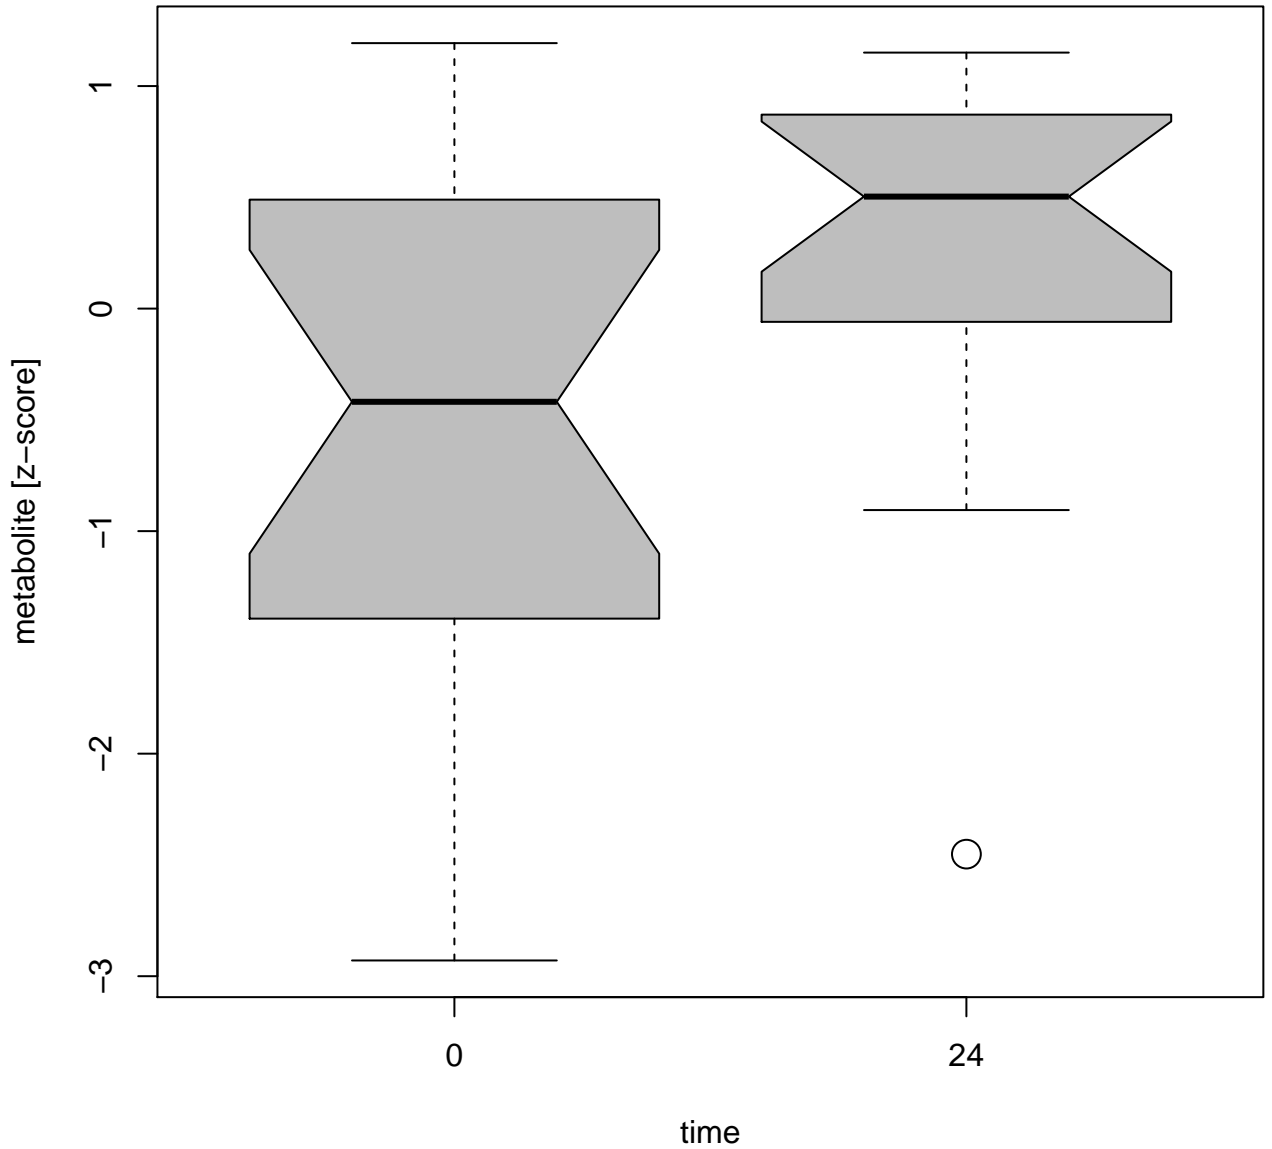

r: UDP-acetylglucosamine, UDP-acetylgalar: UDP-acetylglucosamine, UDP-acetylgalar

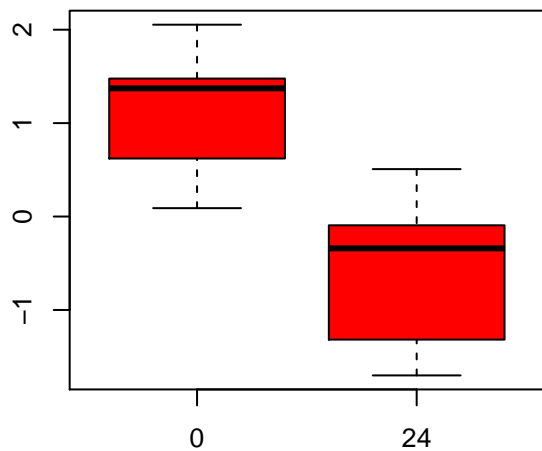

HCT116

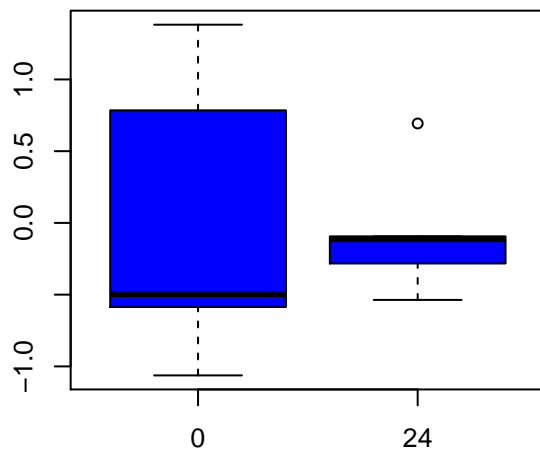

OVCAR

r: UDP-acetylglucosamine, UDP-acetylgalar: UDP-acetylglucosamine, UDP-acetylgalar

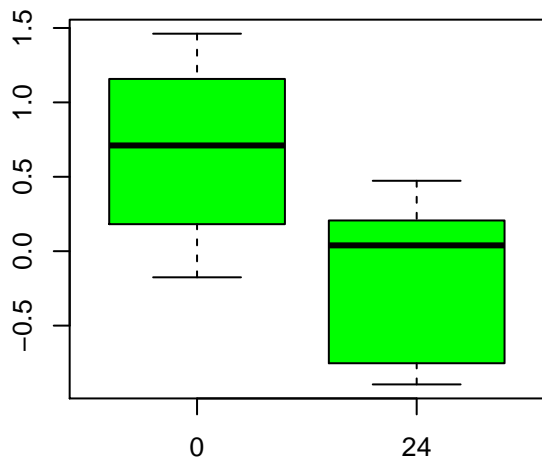

HCT15

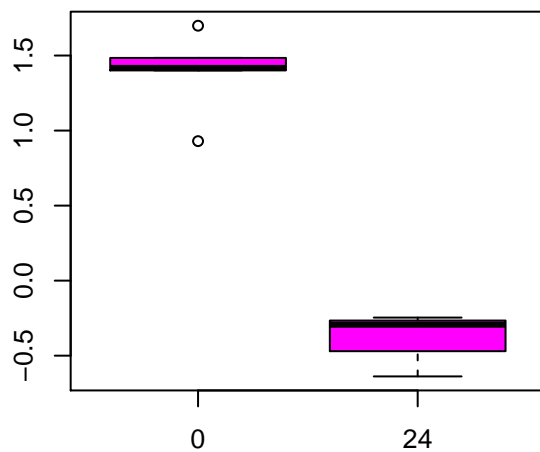

SKOV3

# Isobar: UDP-acetylglucosamine, UDP-acetylgalactosamine

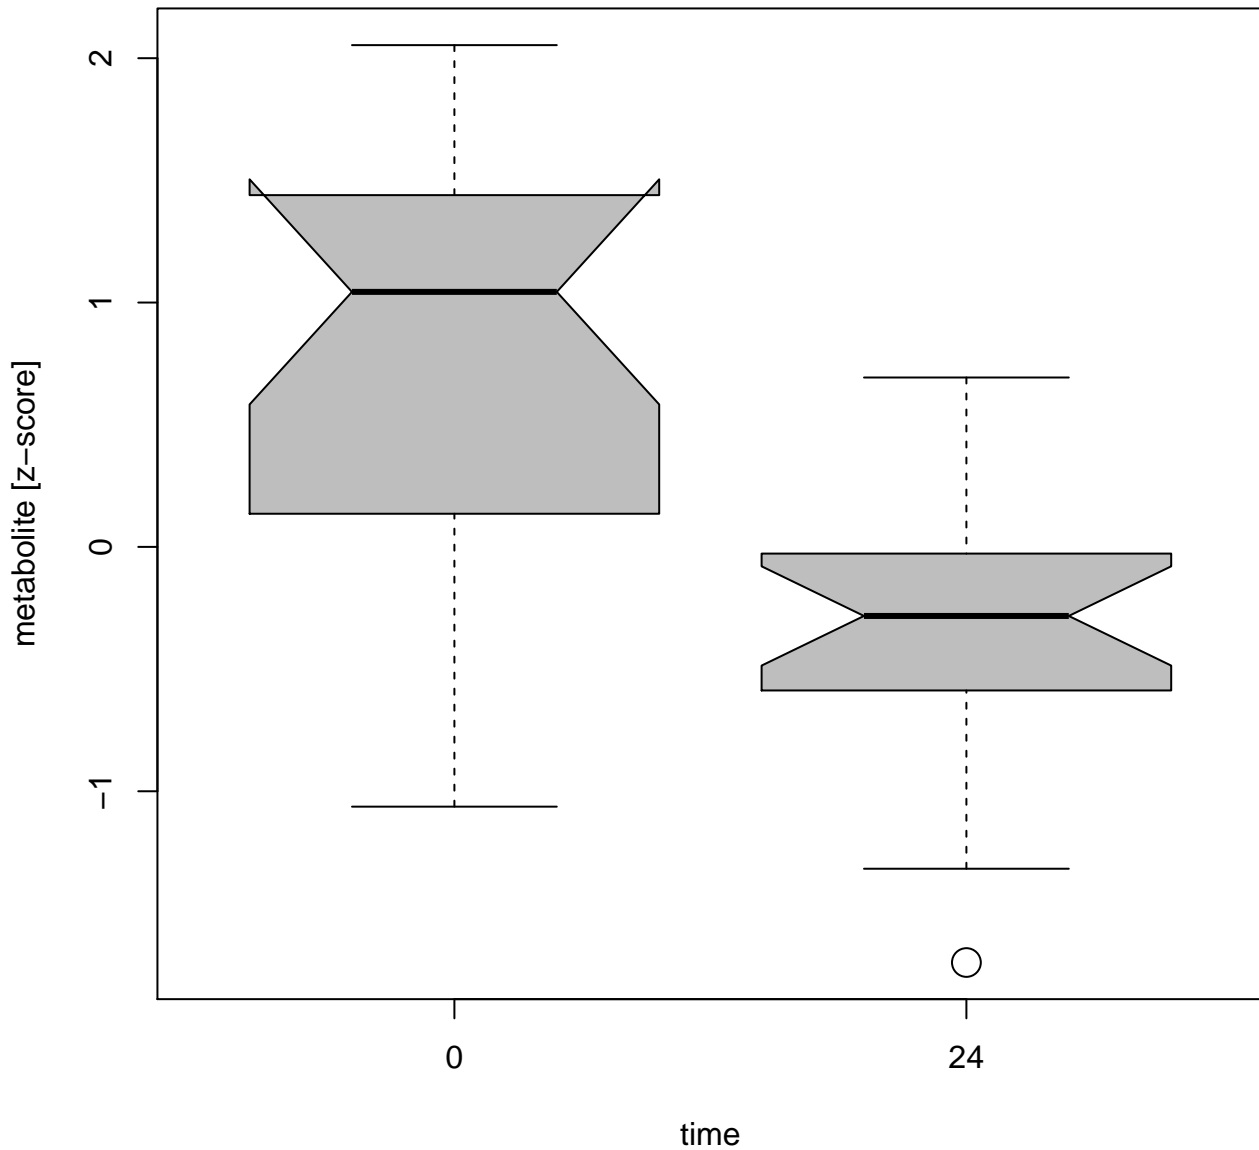

**isoleucine**

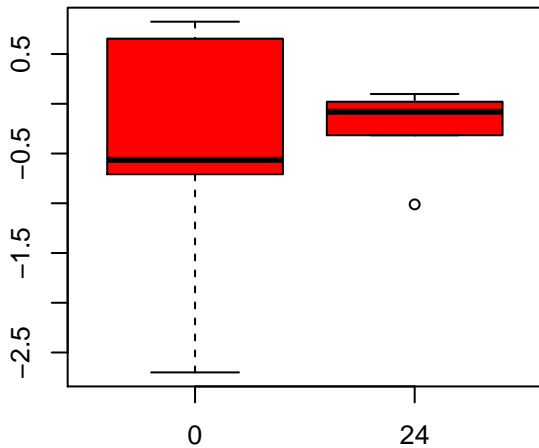

HCT116

**isoleucine**

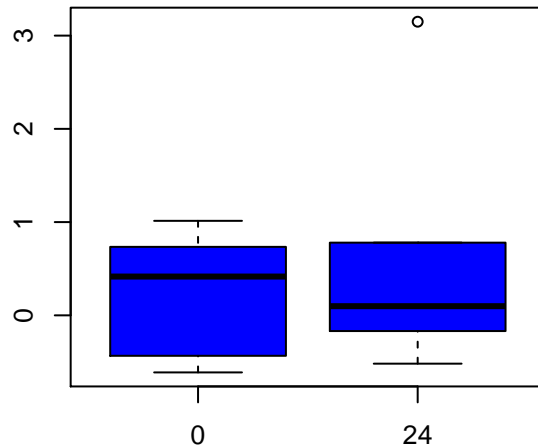

OVCAR

**isoleucine**

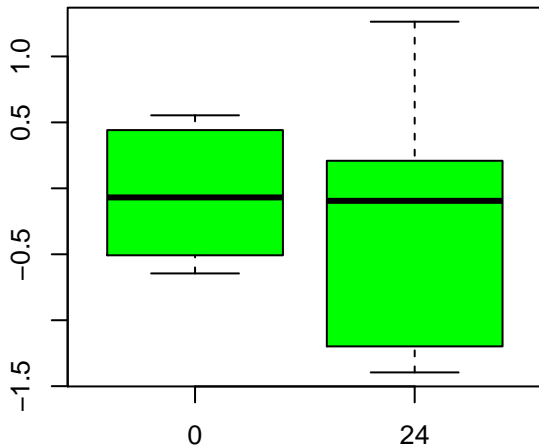

HCT15

**isoleucine**

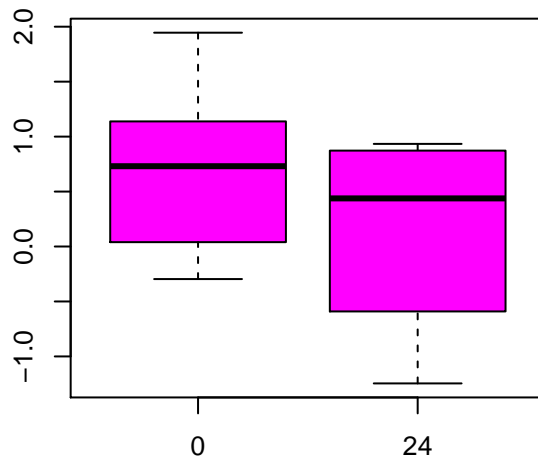

SKOV3



# isoleucine

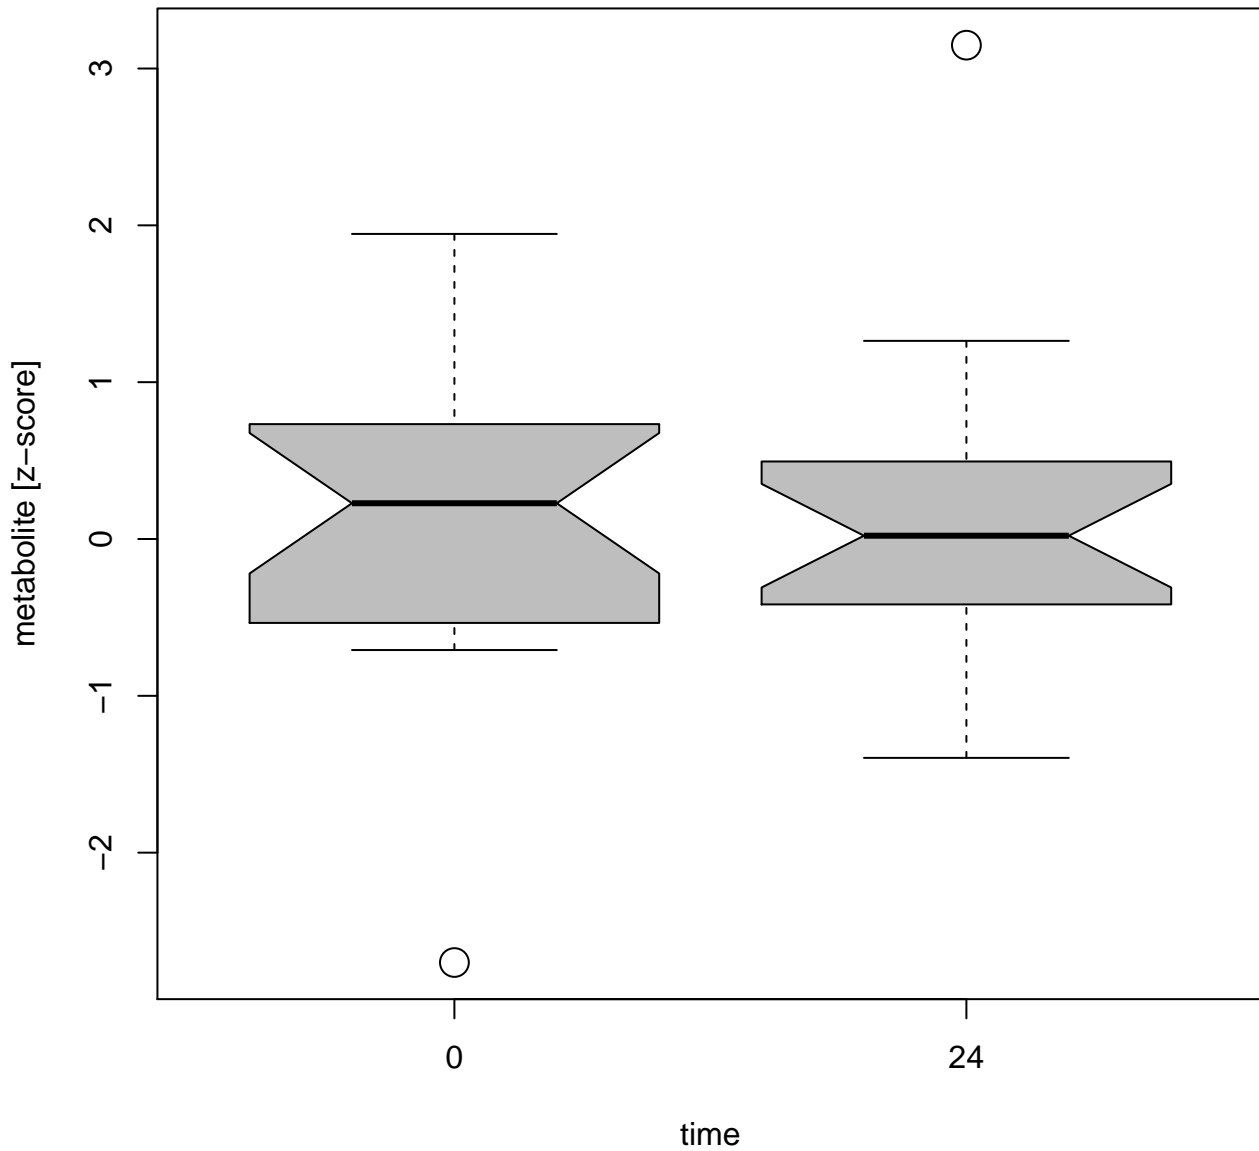

**isoleucylalanine**

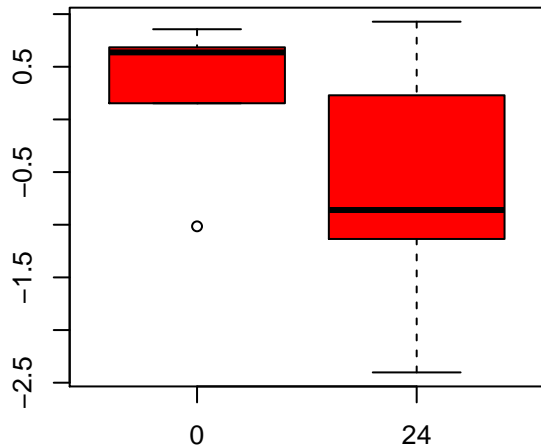

HCT116

**isoleucylalanine**

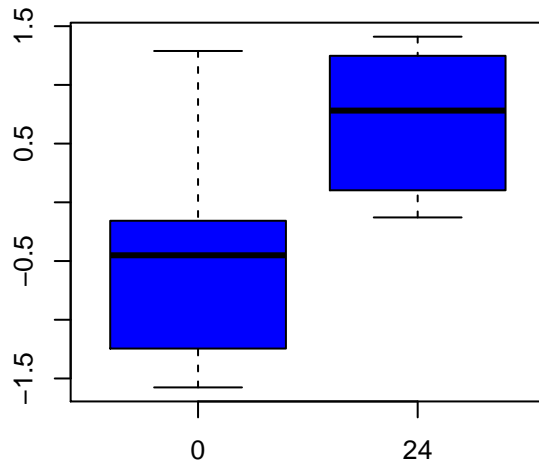

OVCAR

**isoleucylalanine**

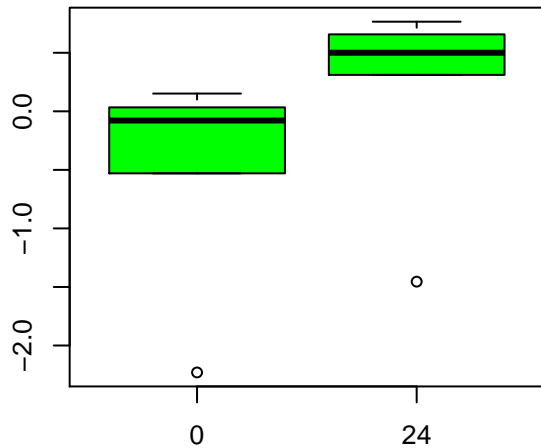

HCT15

**isoleucylalanine**

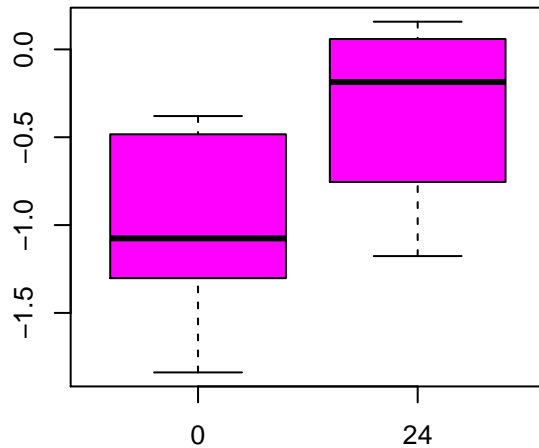

SKOV3

# isoleucylalanine

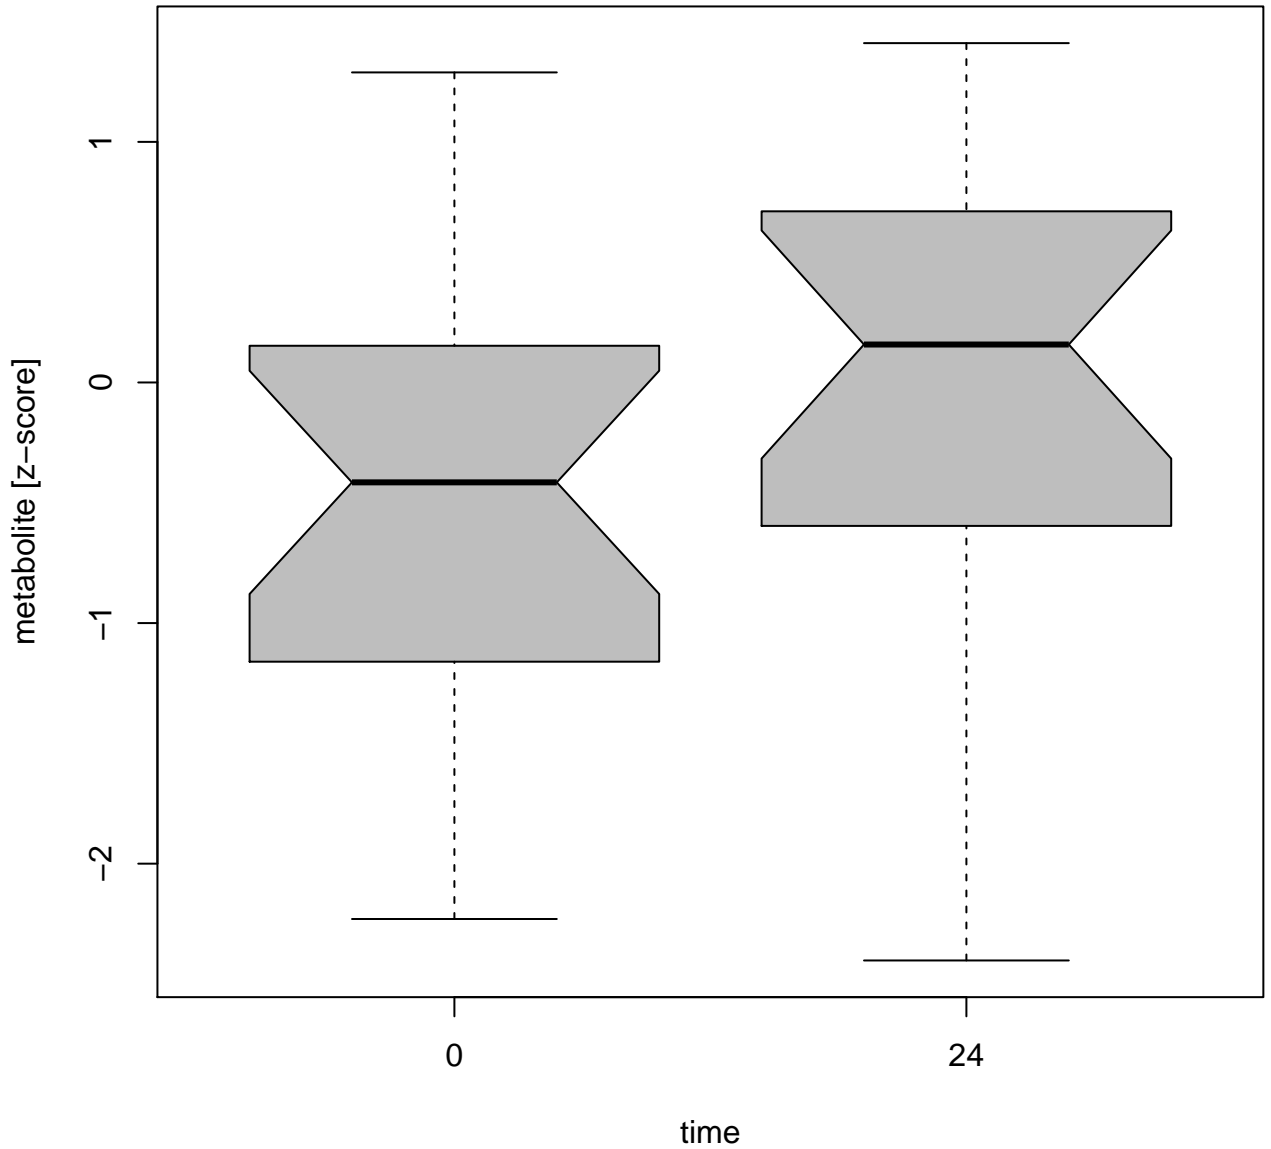

**isoleucylserine**

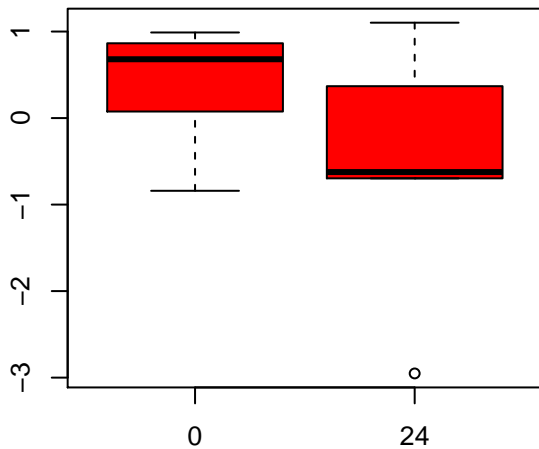

HCT116

**isoleucylserine**

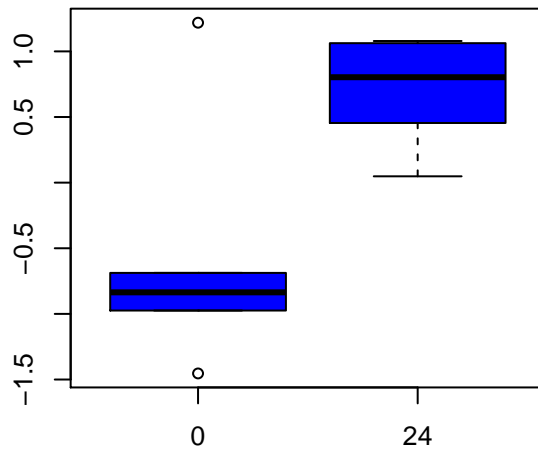

OVCAR

**isoleucylserine**

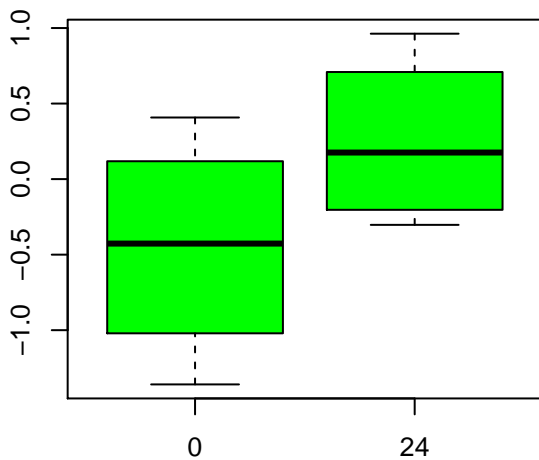

HCT15

**isoleucylserine**

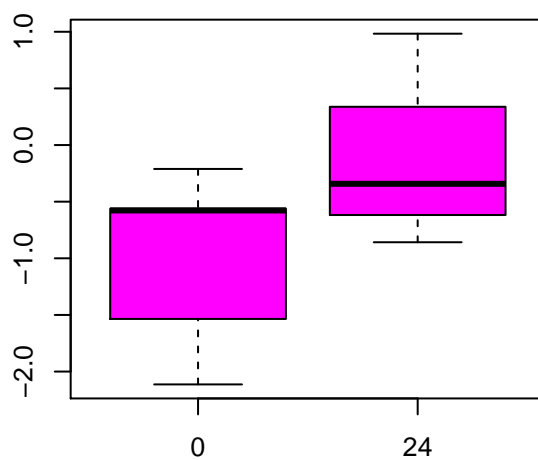

SKOV3

# isoleucylserine

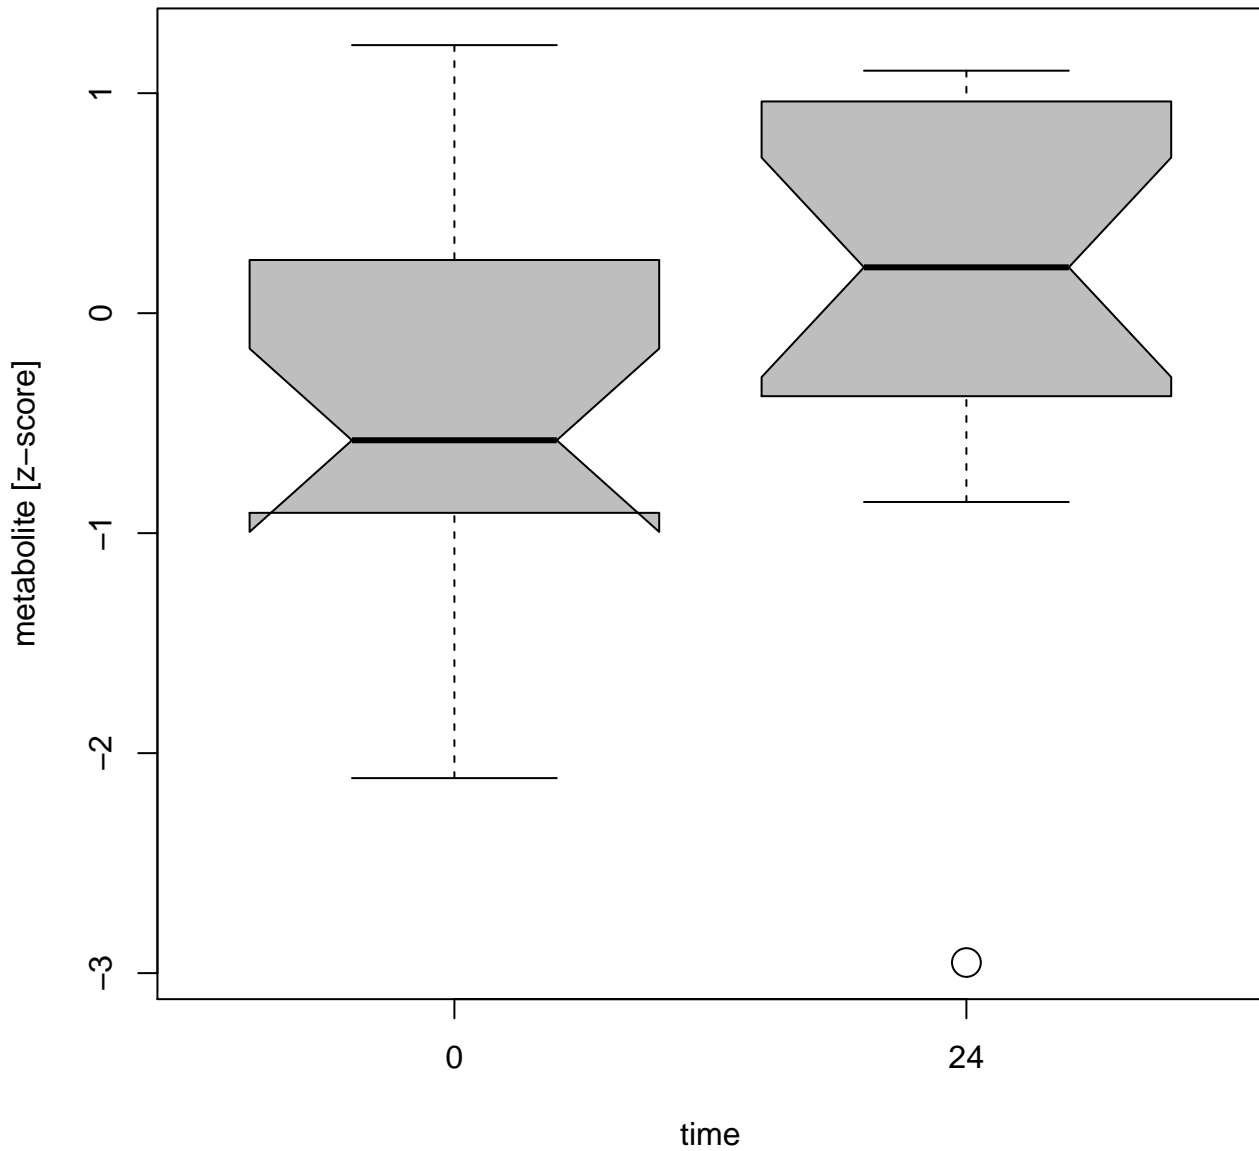

**isovalerylcarnitine**

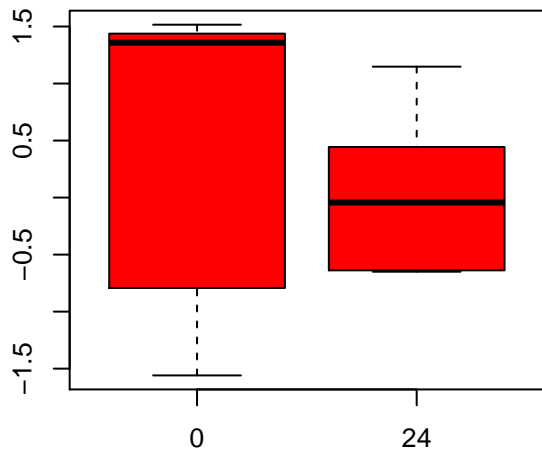

HCT116

**isovalerylcarnitine**

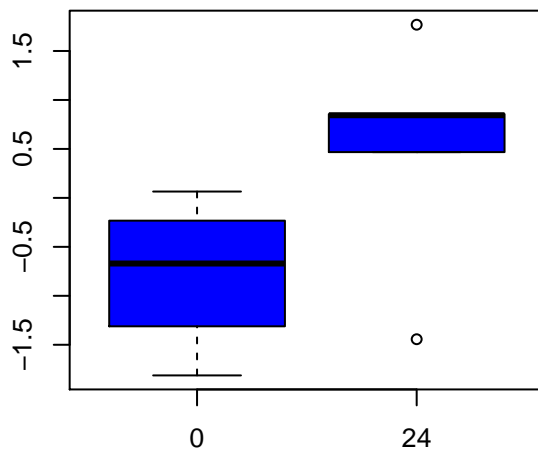

OVCAR

**isovalerylcarnitine**

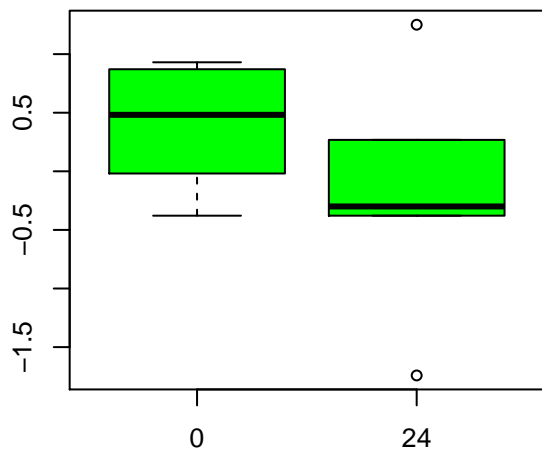

HCT15

**isovalerylcarnitine**

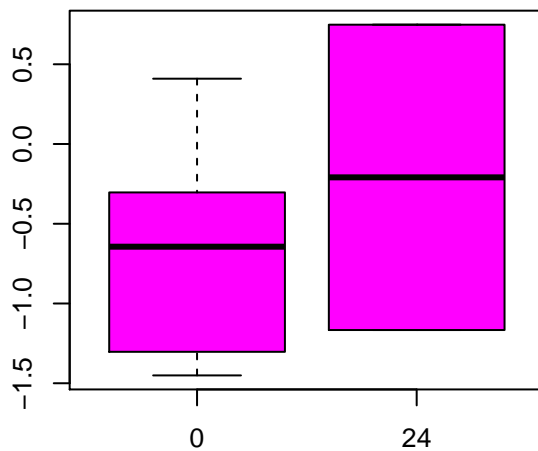

SKOV3

# isovalerylcarnitine

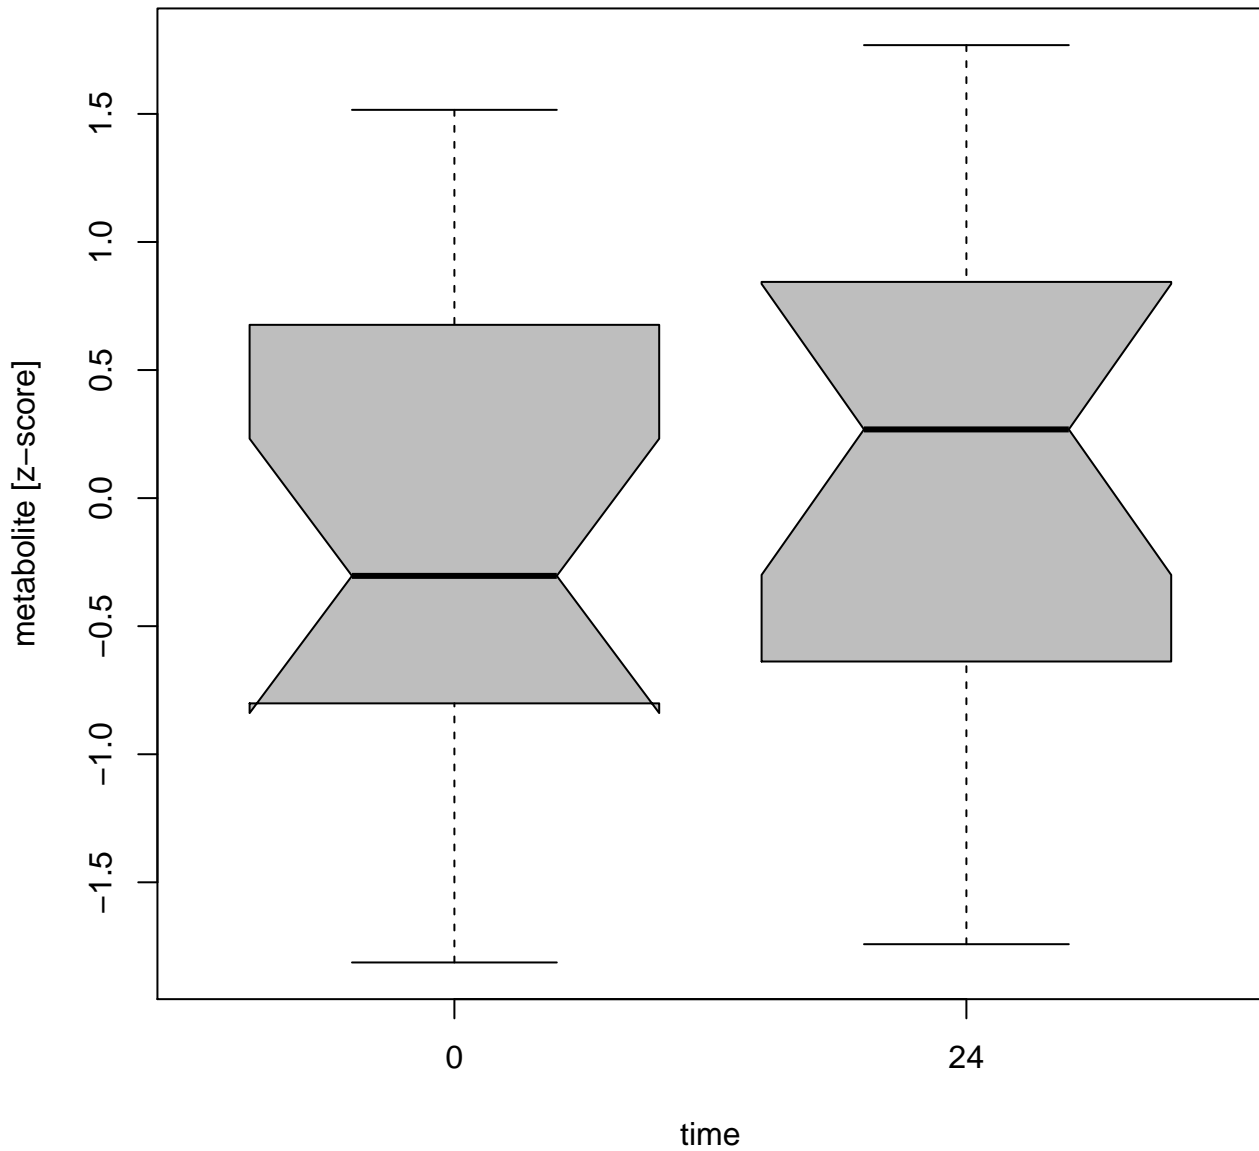

**lactate**

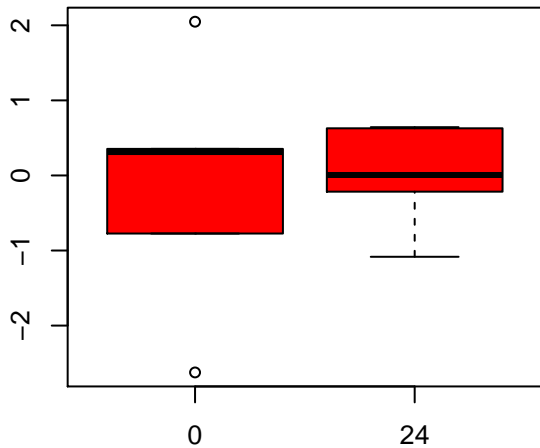

HCT116

**lactate**

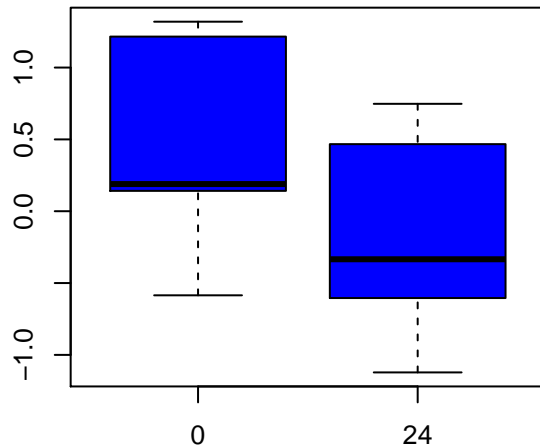

OVCAR

**lactate**

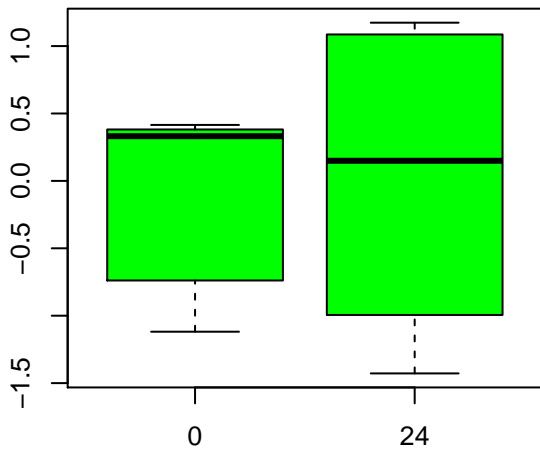

HCT15

**lactate**

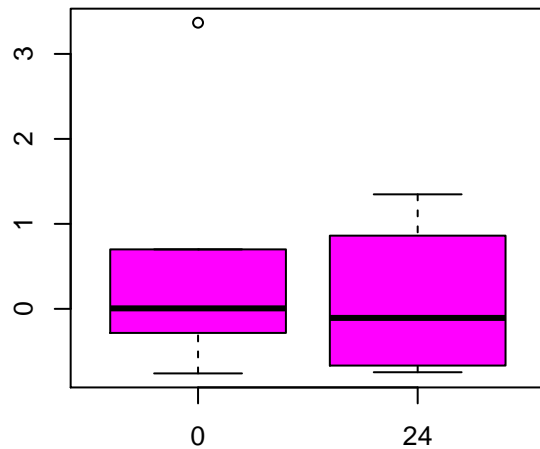

SKOV3



# lactate

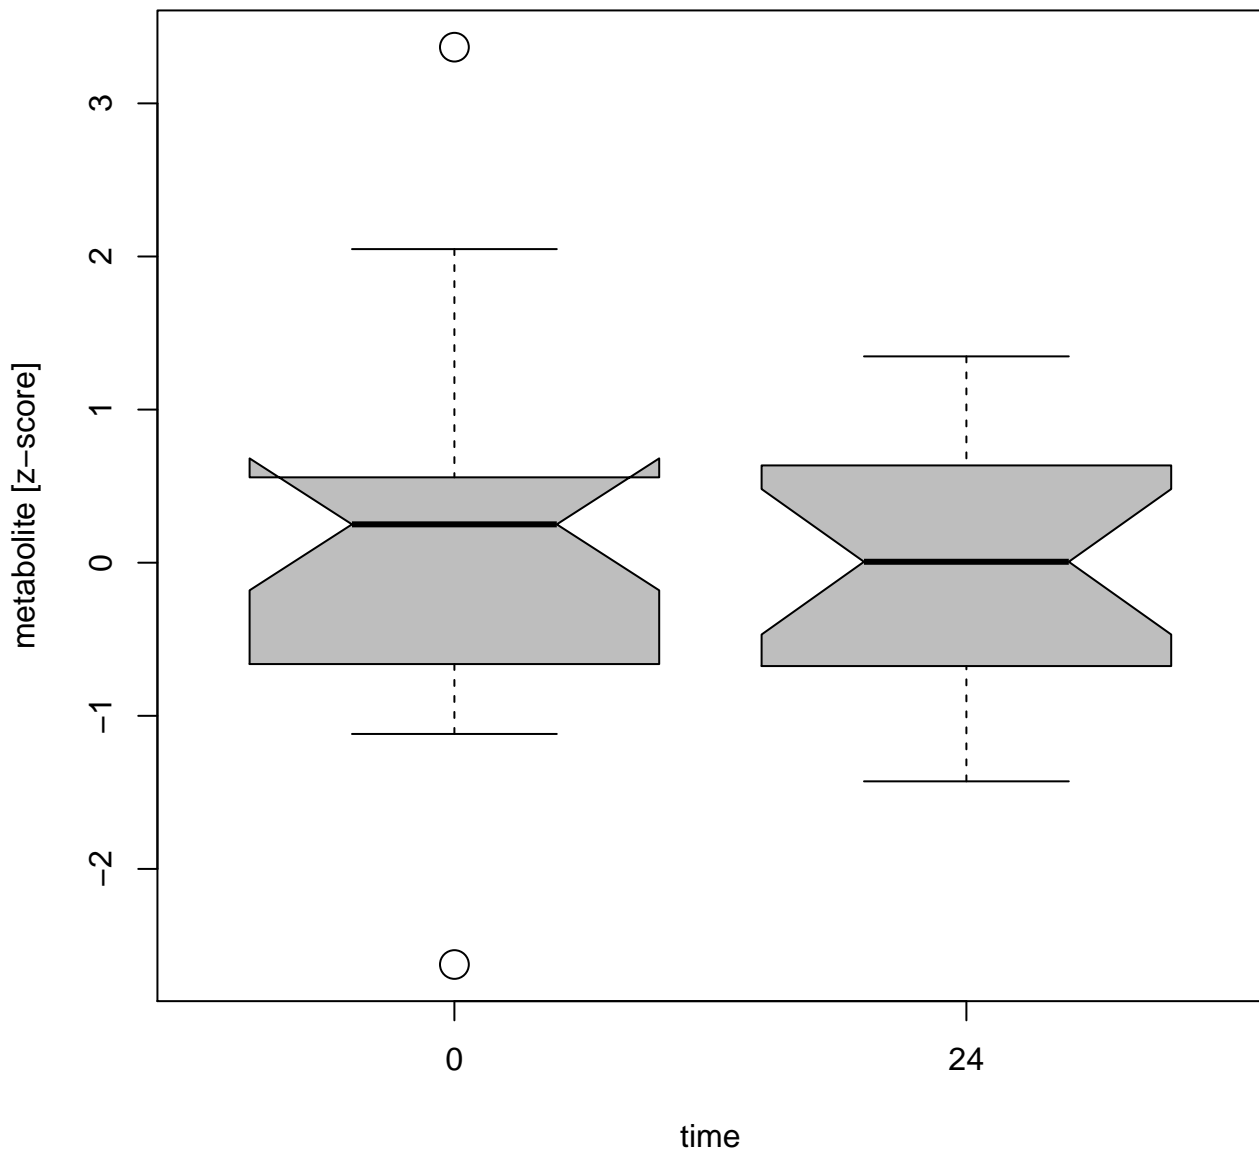

**lactose**

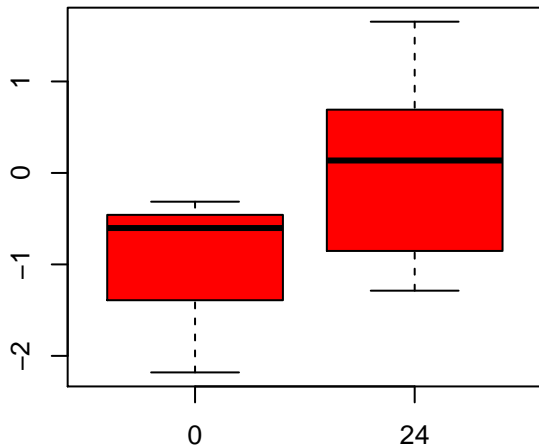

HCT116

**lactose**

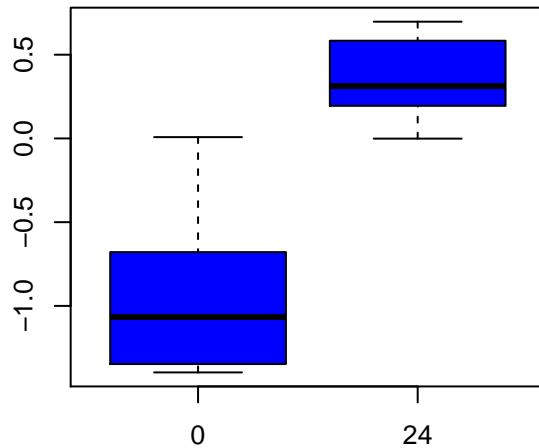

OVCAR

**lactose**

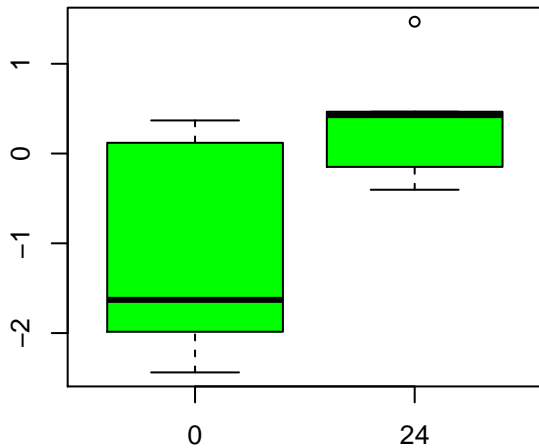

HCT15

**lactose**

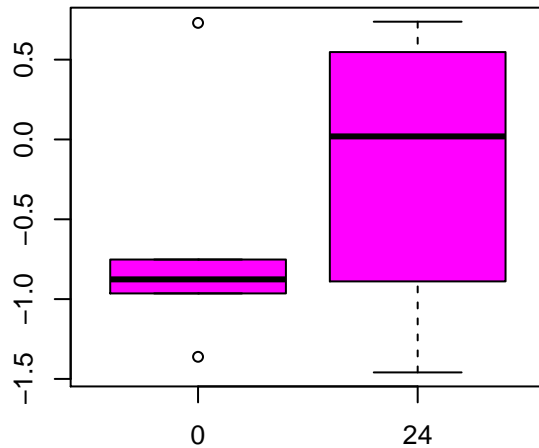

SKOV3

# lactose

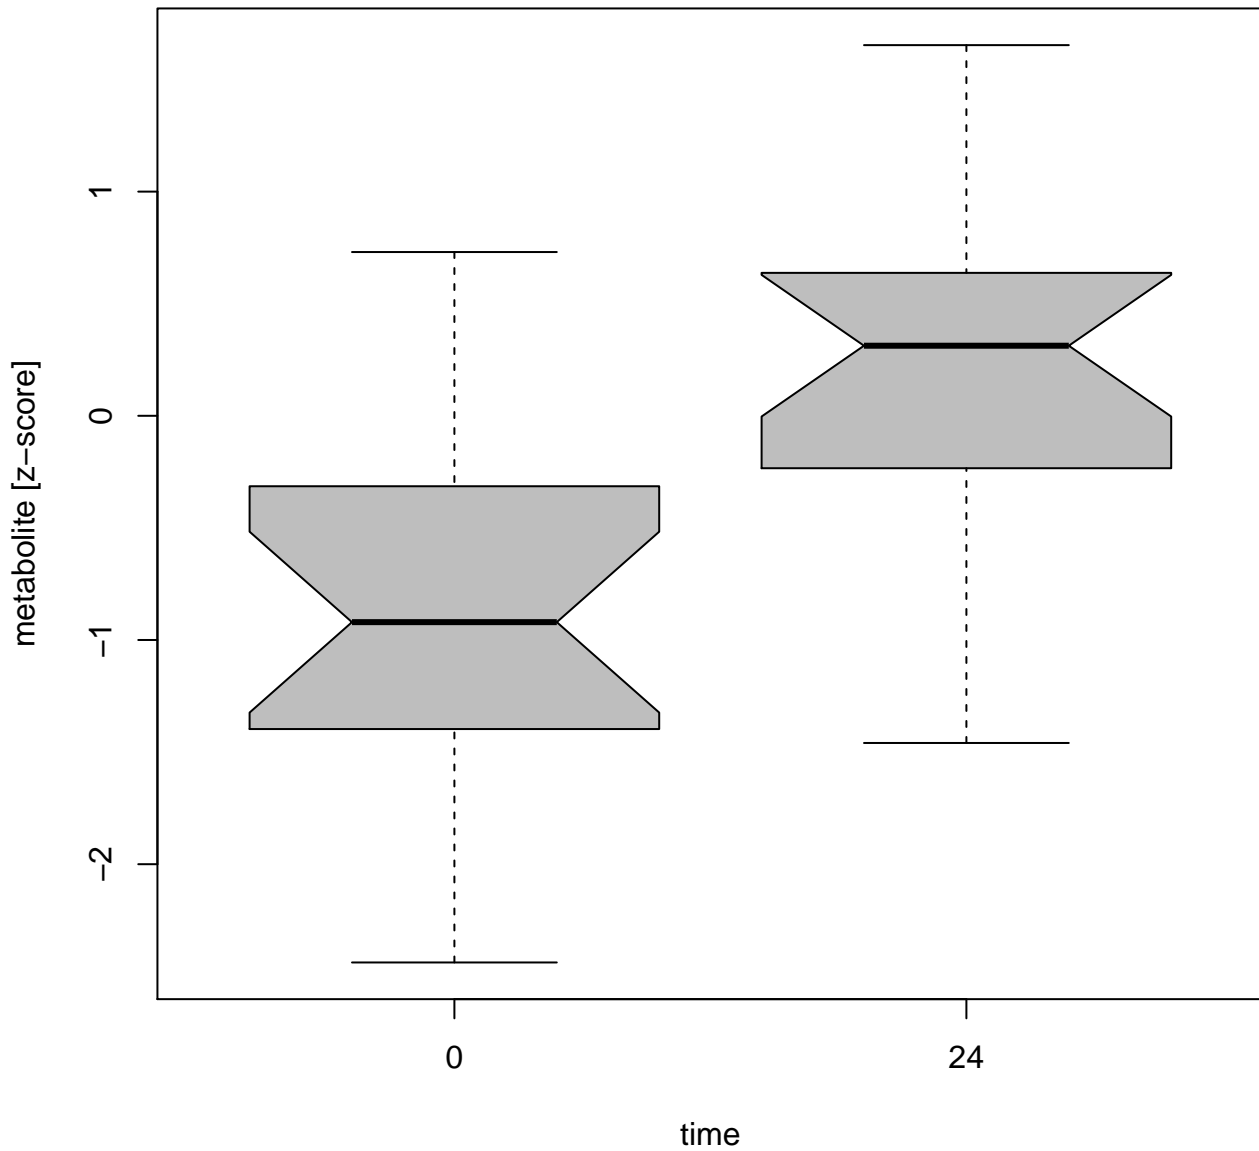

**leucine**

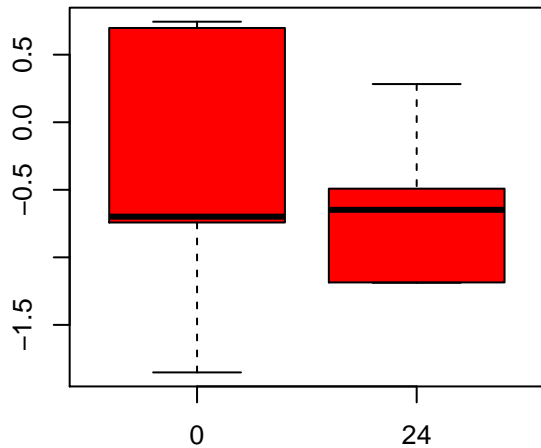

HCT116

**leucine**

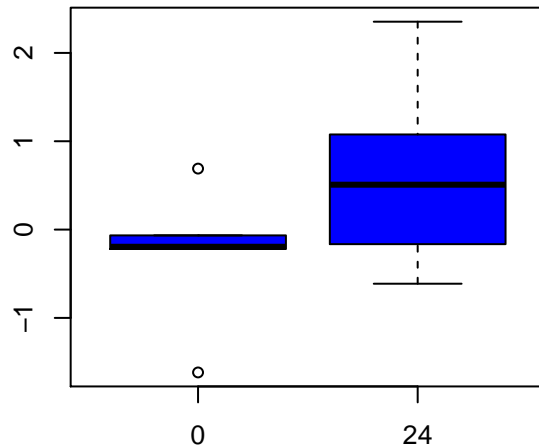

OVCAR

**leucine**

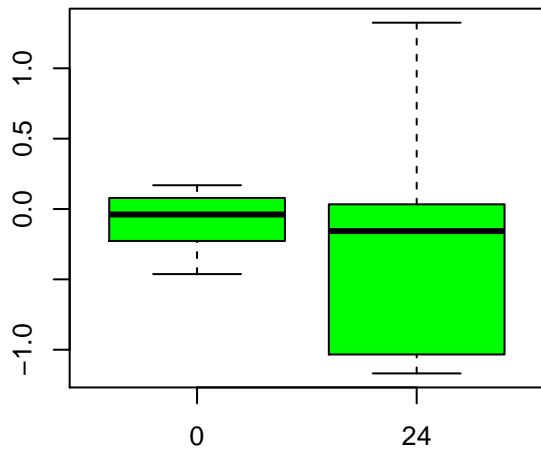

HCT15

**leucine**

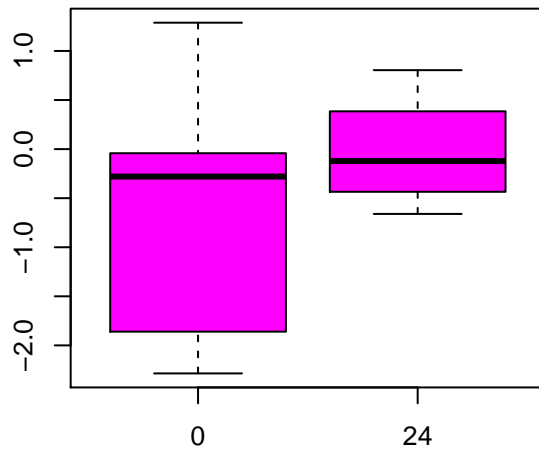

SKOV3

# leucine

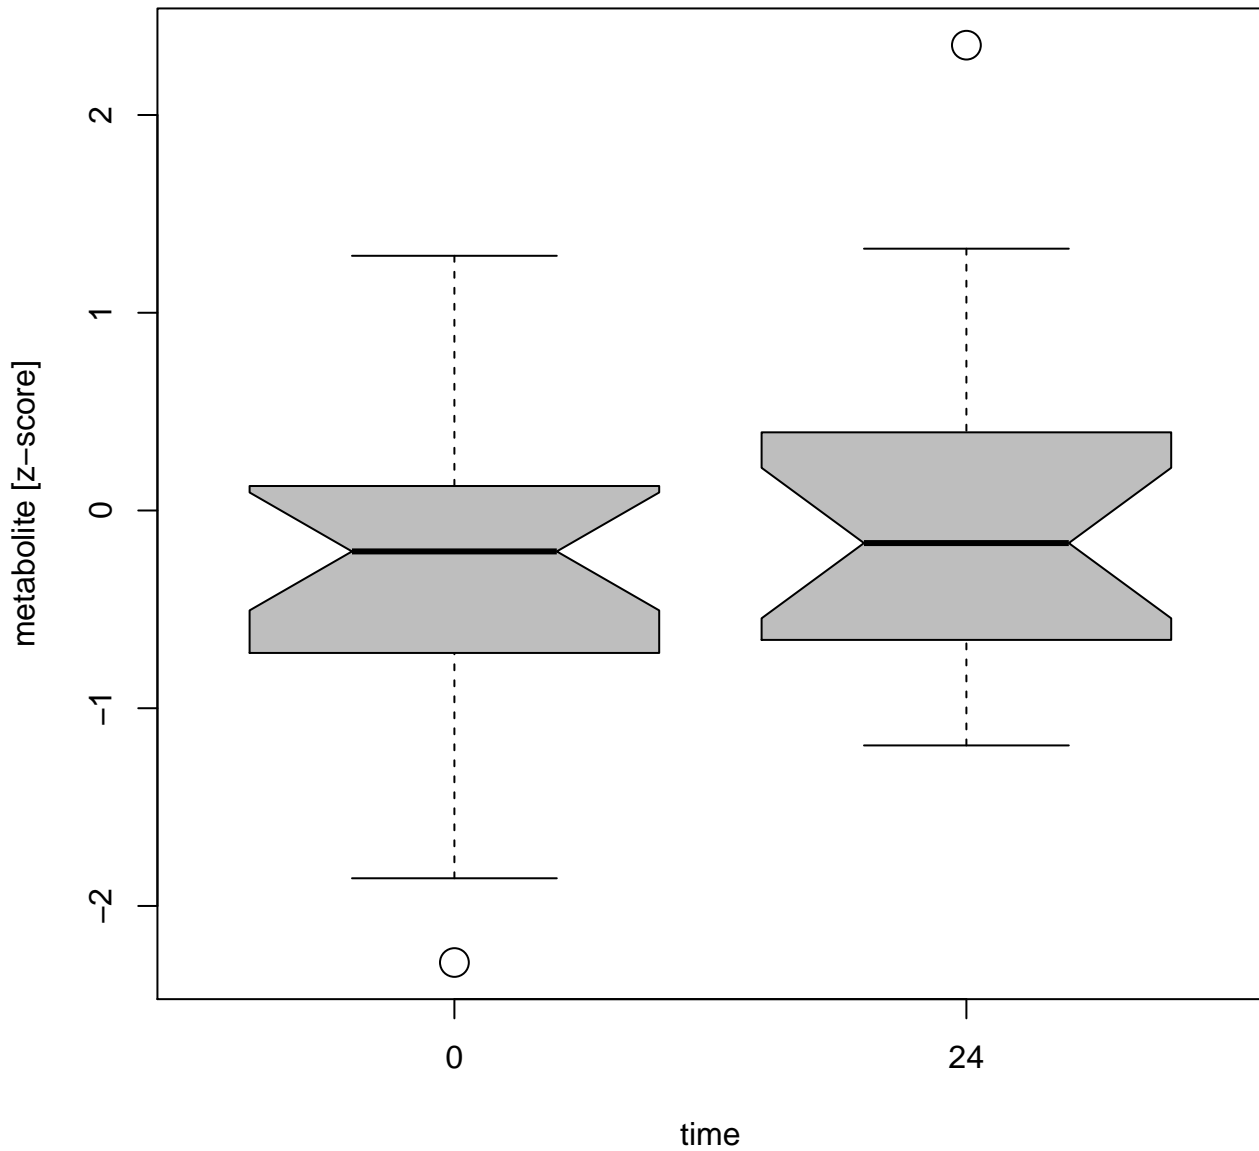

**leucylalanine**

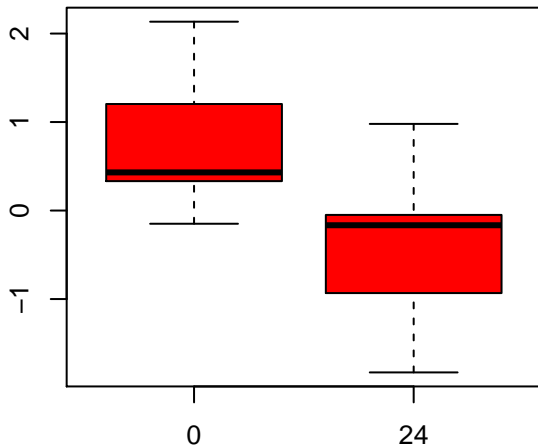

HCT116

**leucylalanine**

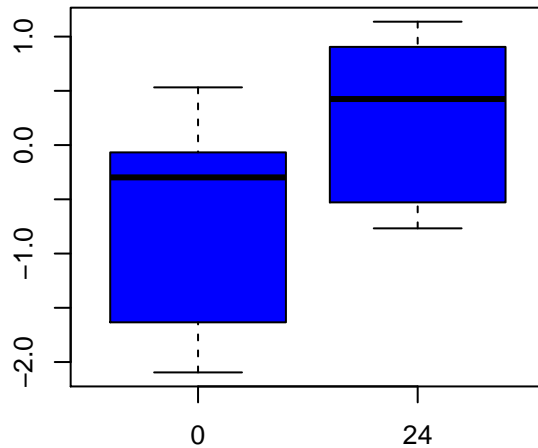

OVCAR

**leucylalanine**

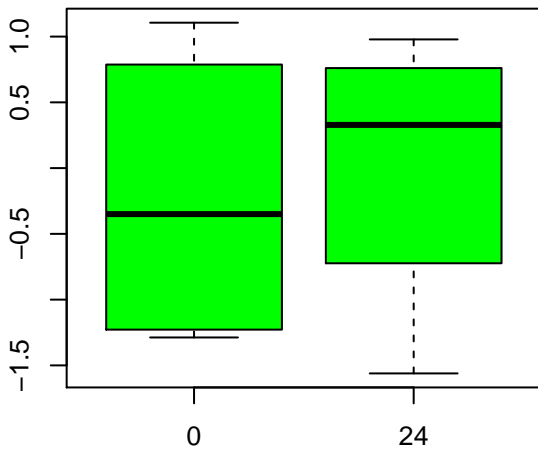

HCT15

**leucylalanine**

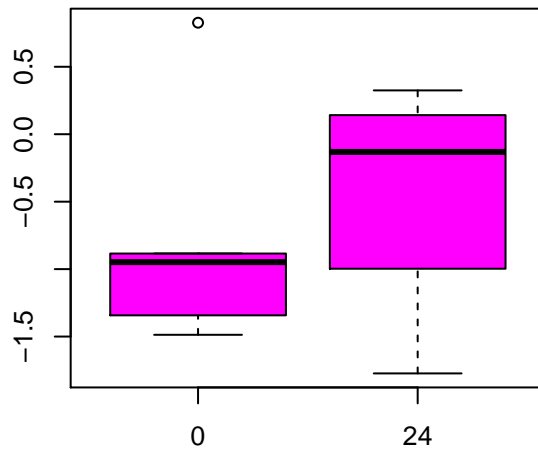

SKOV3

# leucylalanine

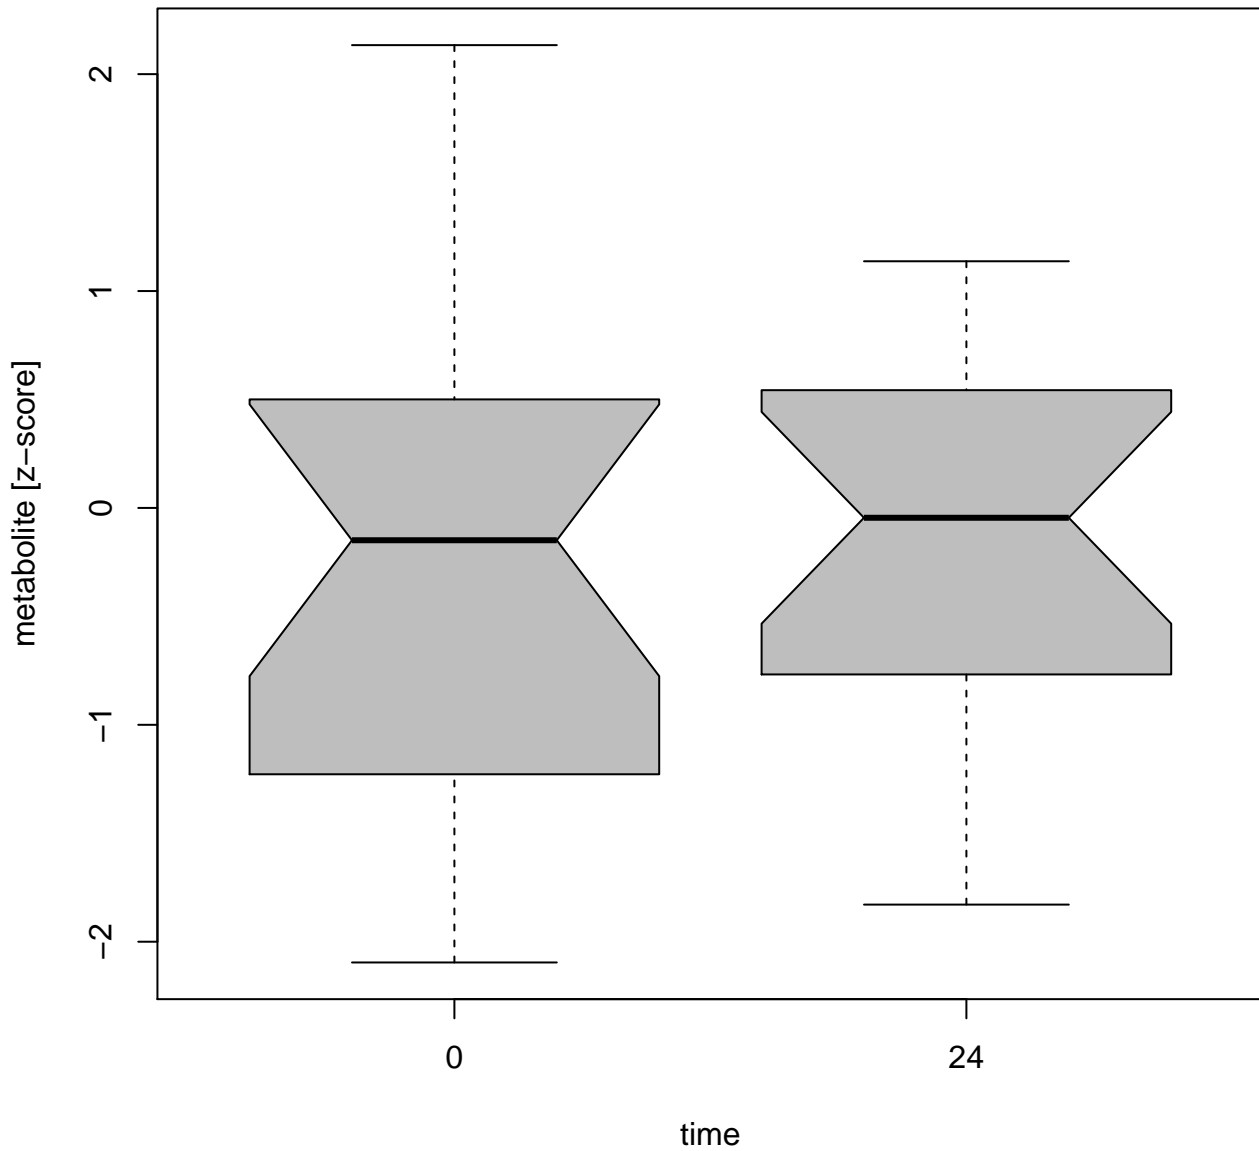

**leucylglutamate**

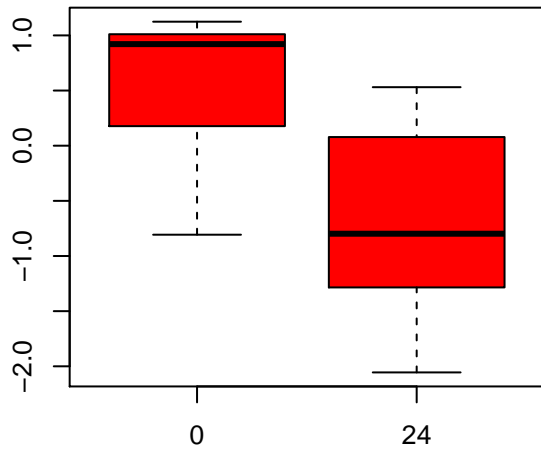

HCT116

**leucylglutamate**

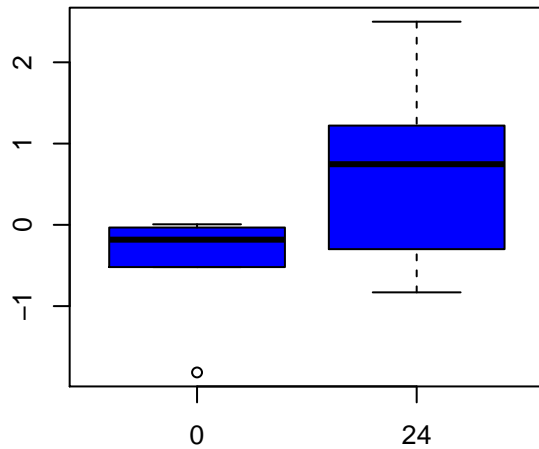

OVCAR

**leucylglutamate**

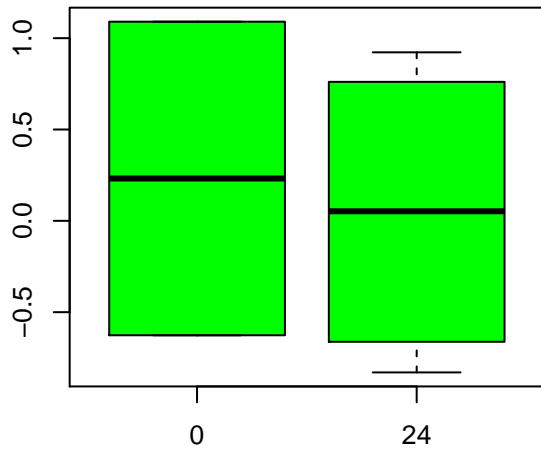

HCT15

**leucylglutamate**

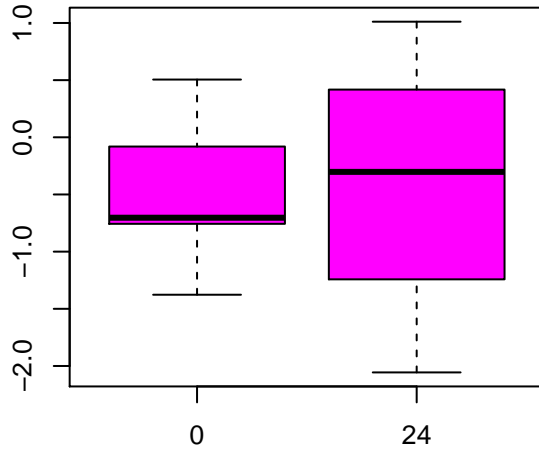

SKOV3



# leucylglutamate

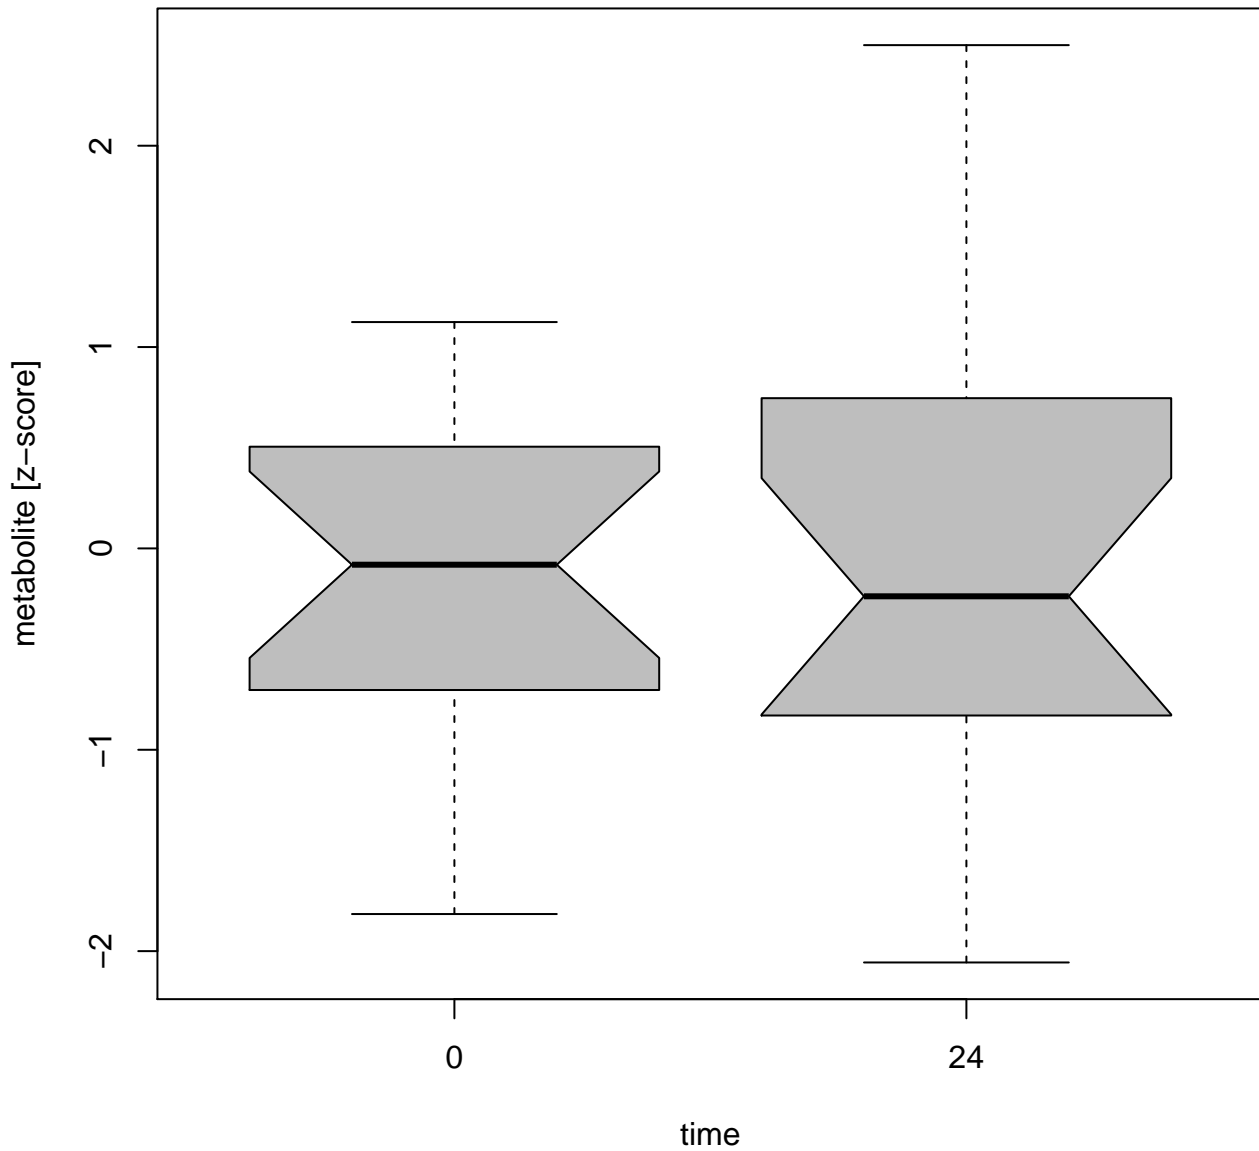

**leucylglycine**

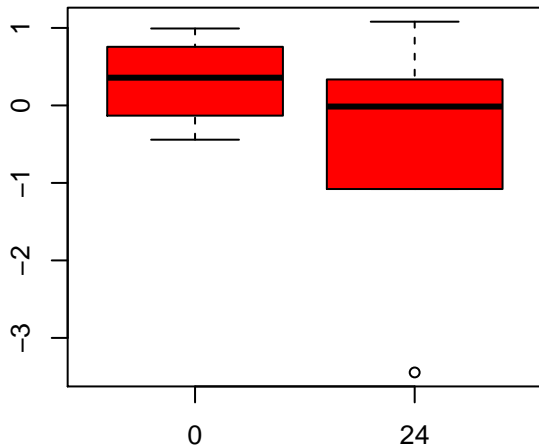

HCT116

**leucylglycine**

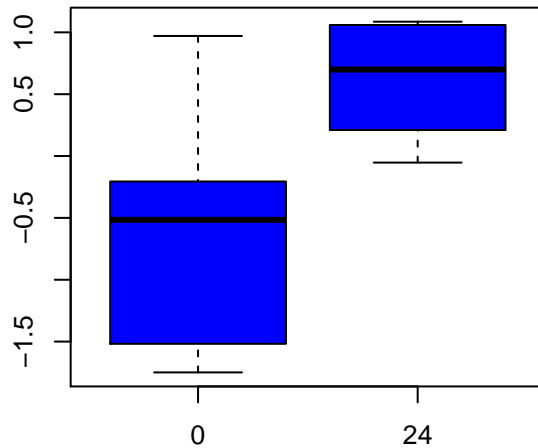

OVCAR

**leucylglycine**

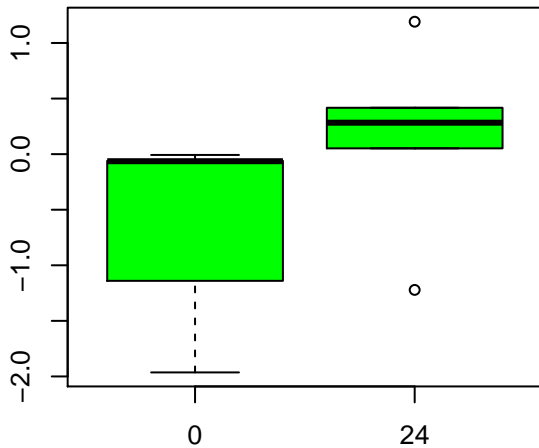

HCT15

**leucylglycine**

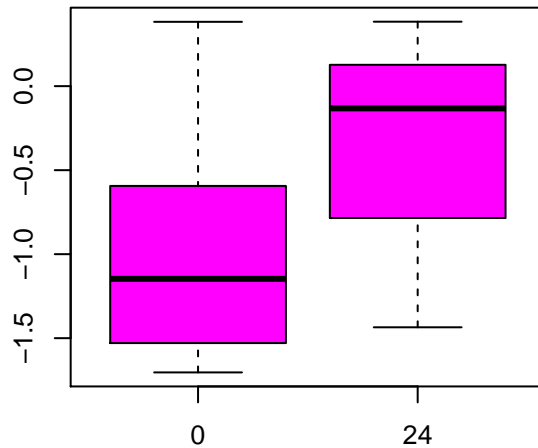

SKOV3

# leucylglycine

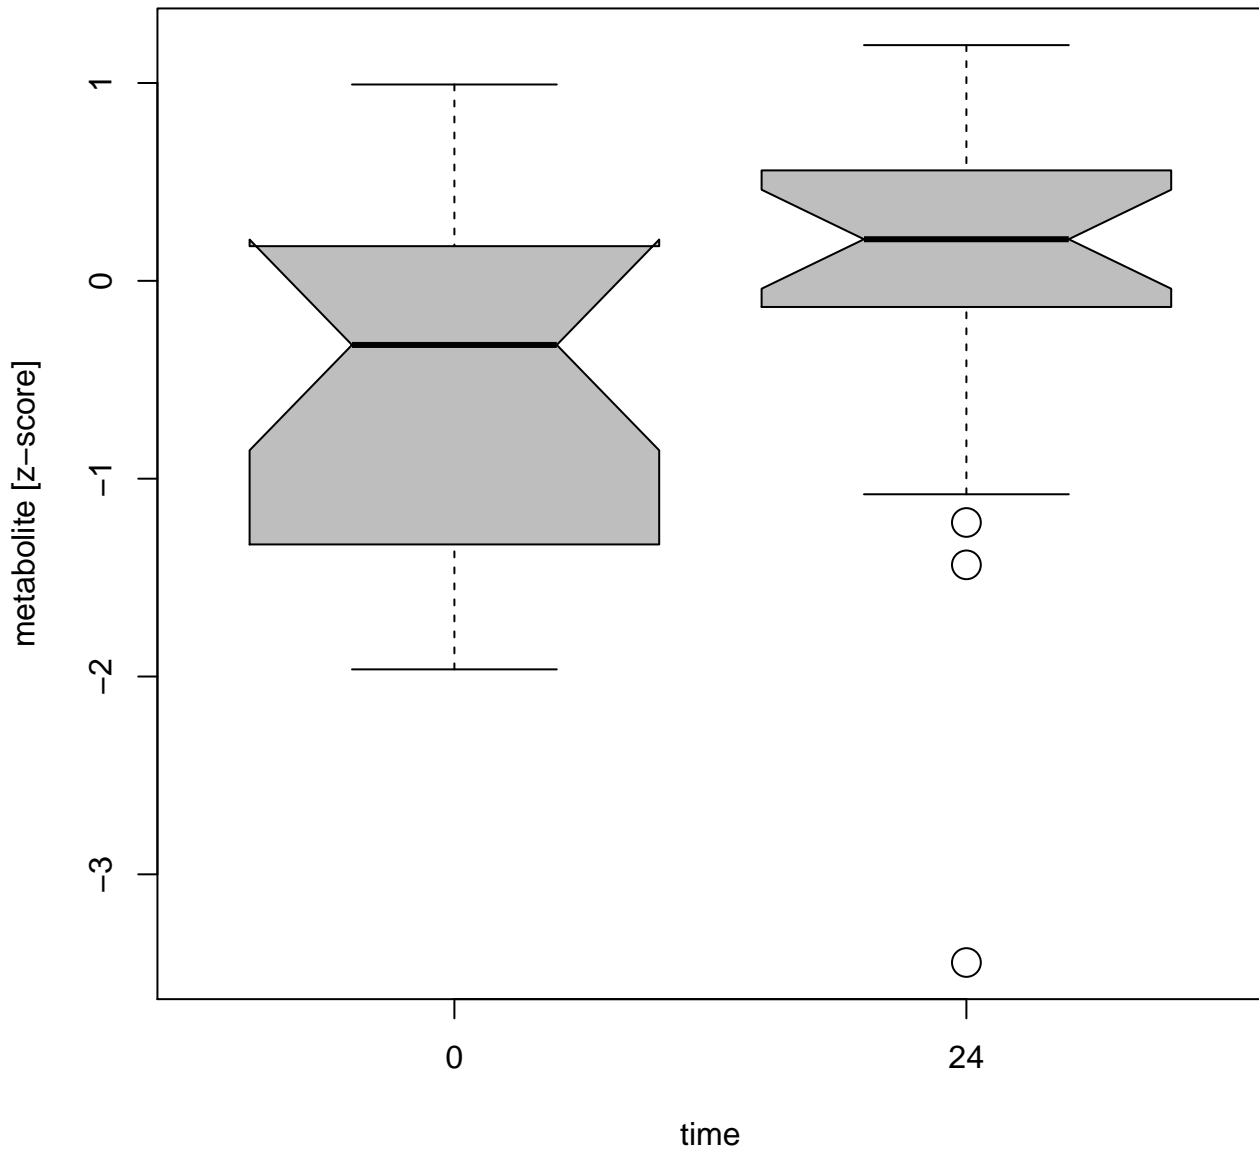

**leucylisoleucine**

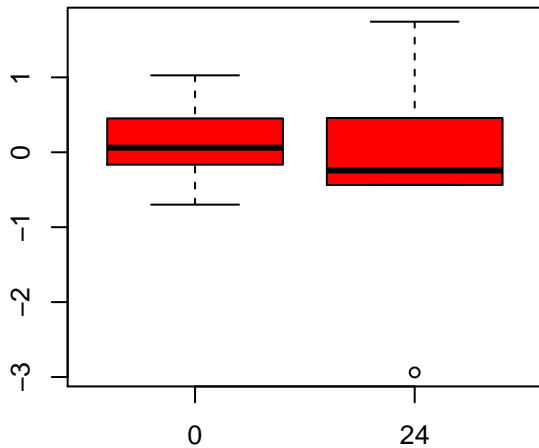

HCT116

**leucylisoleucine**

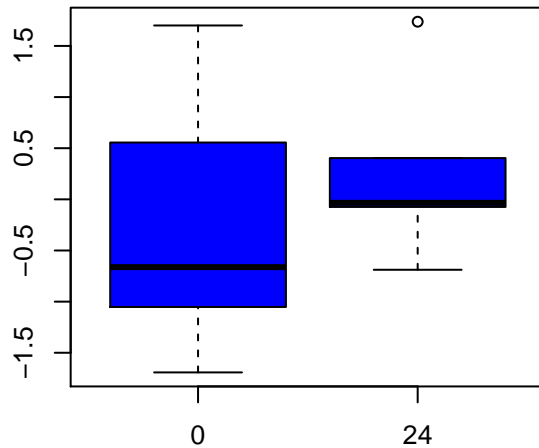

OVCAR

**leucylisoleucine**

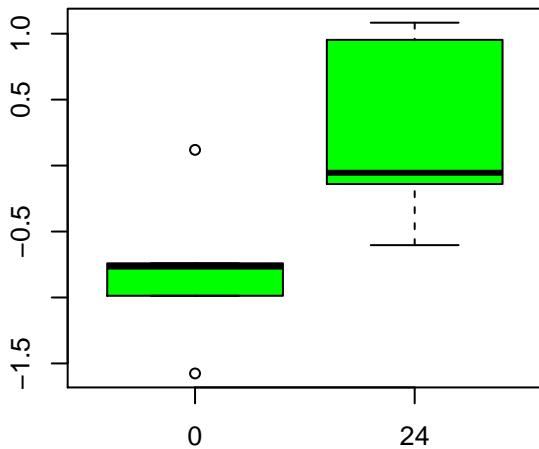

HCT15

**leucylisoleucine**

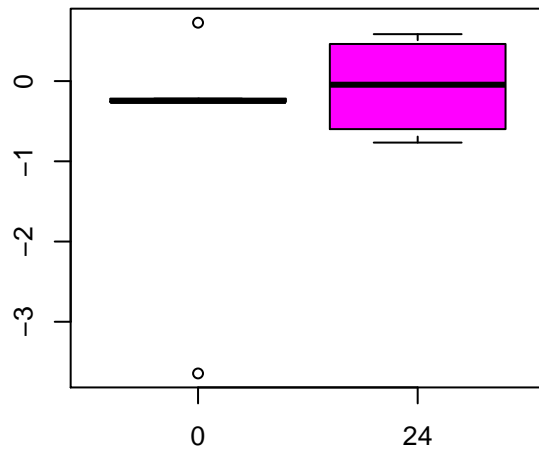

SKOV3

# leucylisoleucine

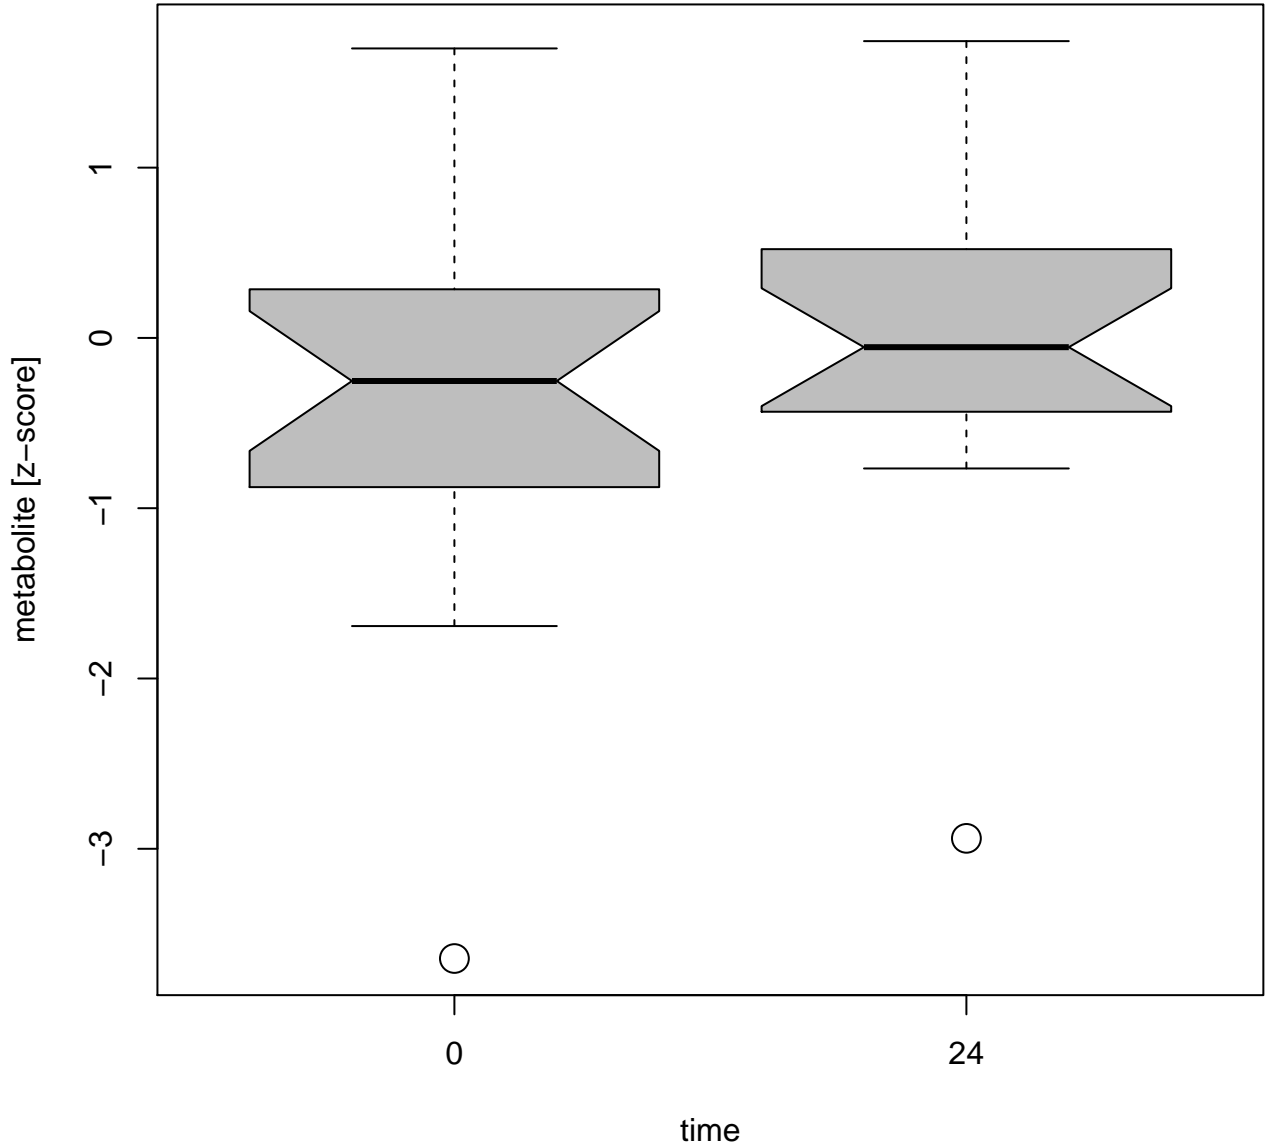

**leucylleucine**

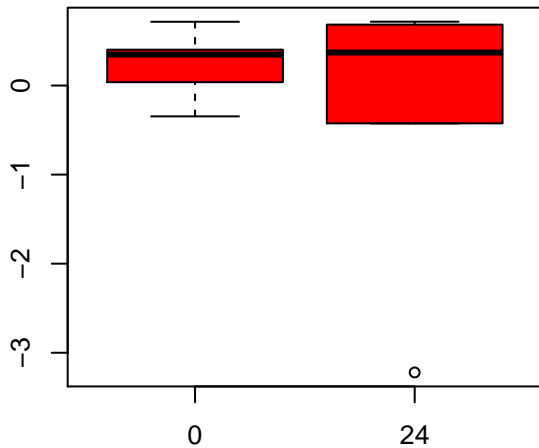

HCT116

**leucylleucine**

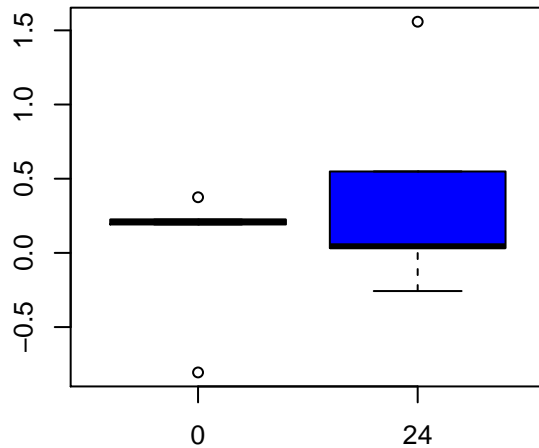

OVCAR

**leucylleucine**

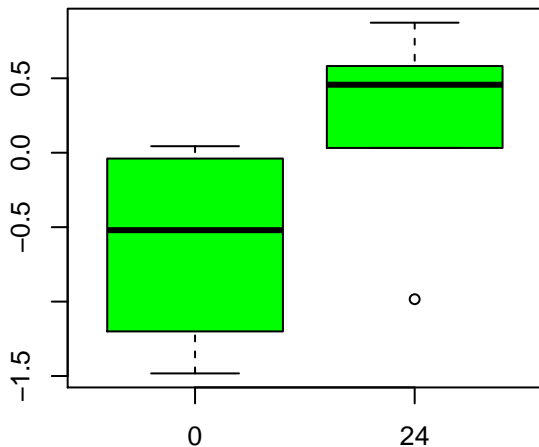

HCT15

**leucylleucine**

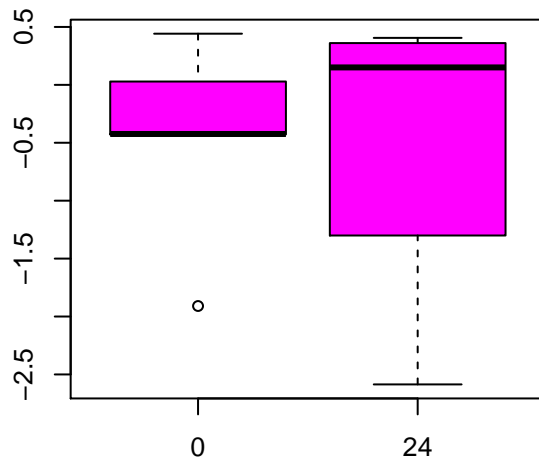

SKOV3

# leucylleucine

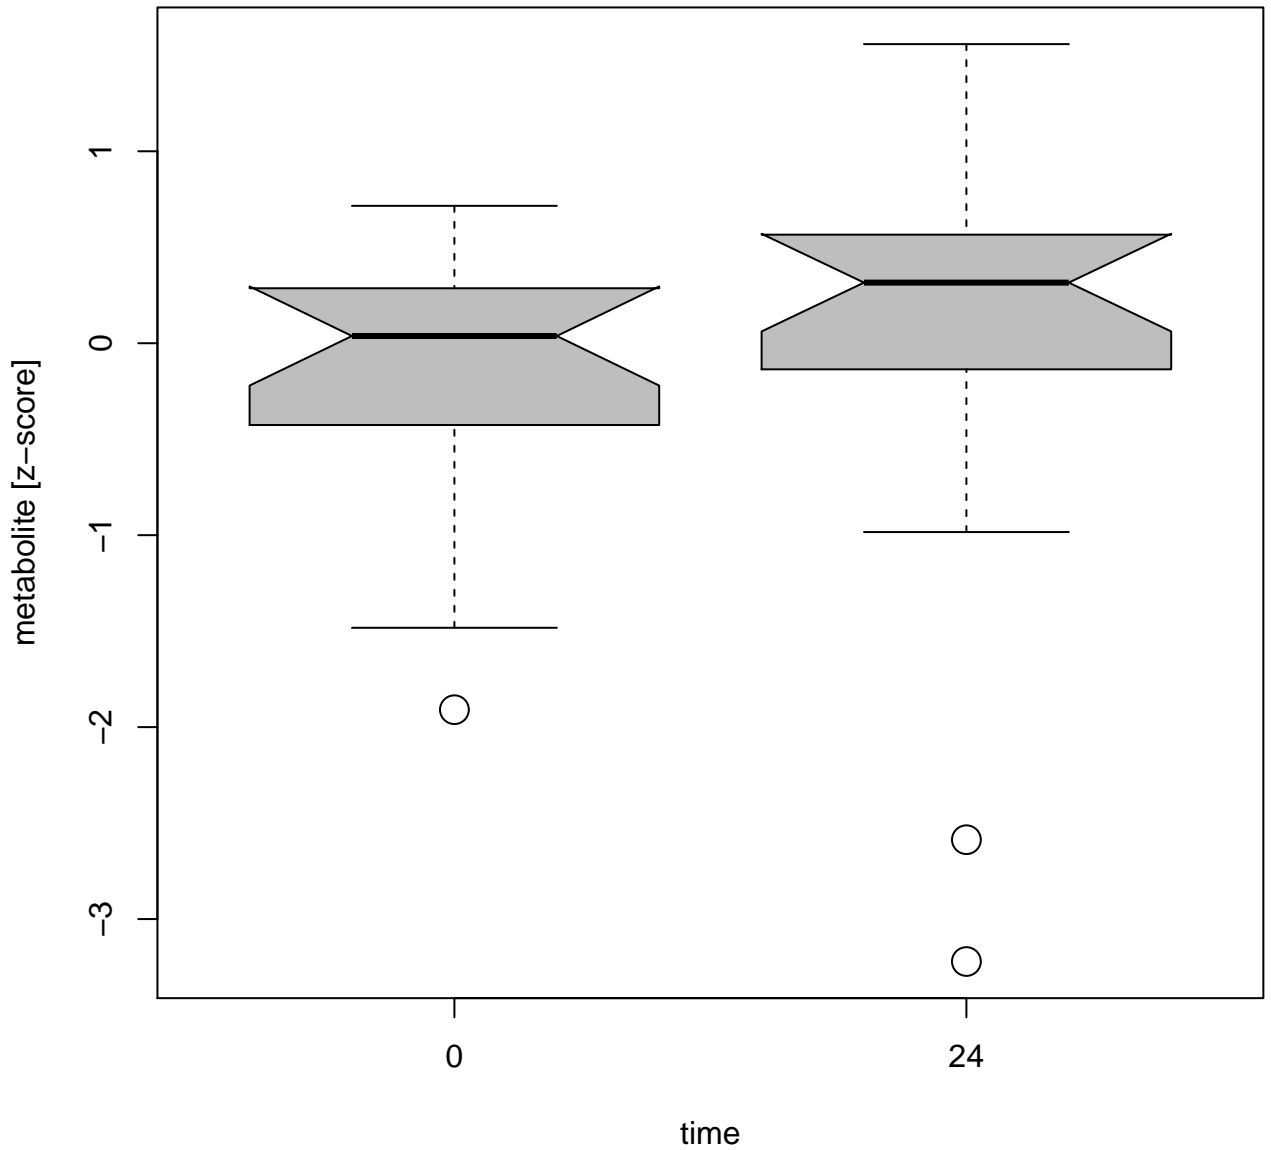

**leucylphenylalanine**

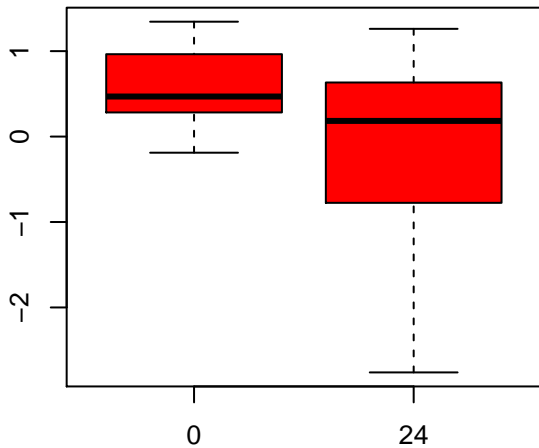

HCT116

**leucylphenylalanine**

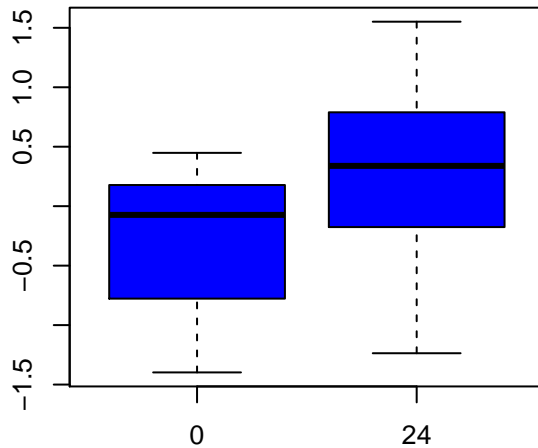

OVCAR

**leucylphenylalanine**

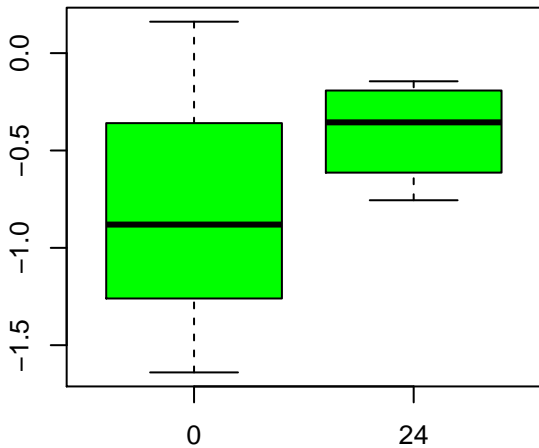

HCT15

**leucylphenylalanine**

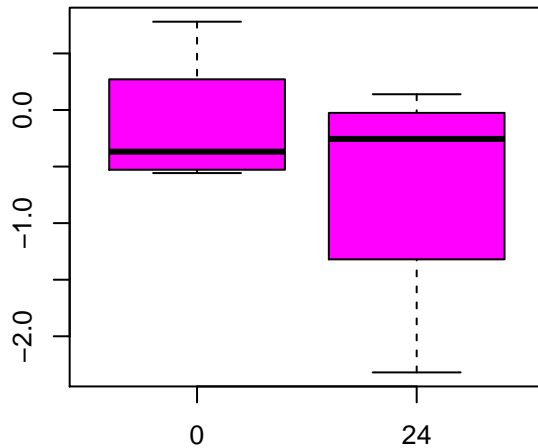

SKOV3



# leucylphenylalanine

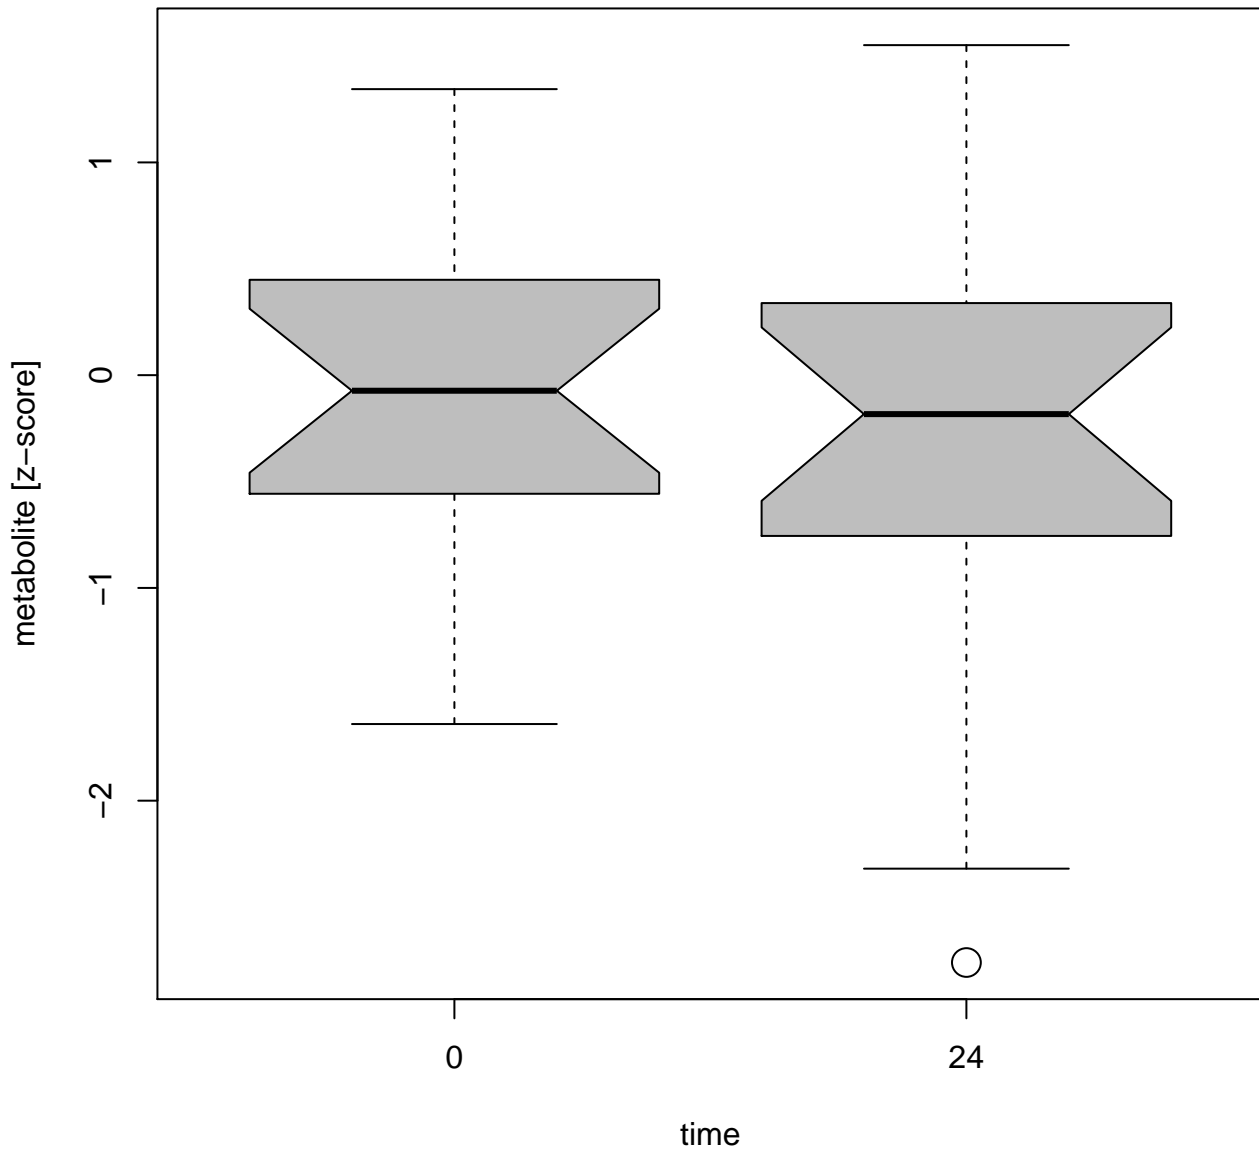

**leucylserine**

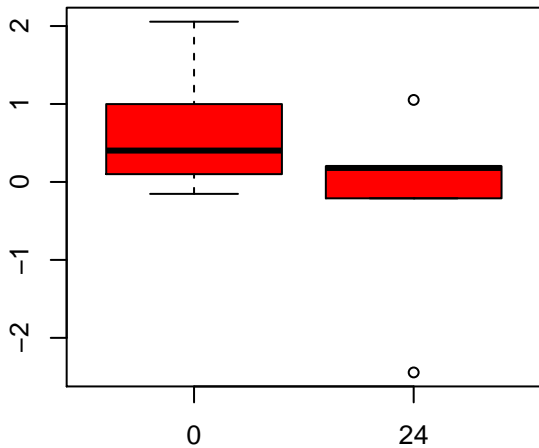

HCT116

**leucylserine**

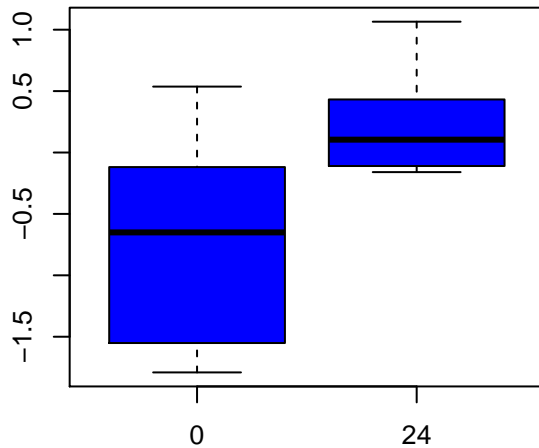

OVCAR

**leucylserine**

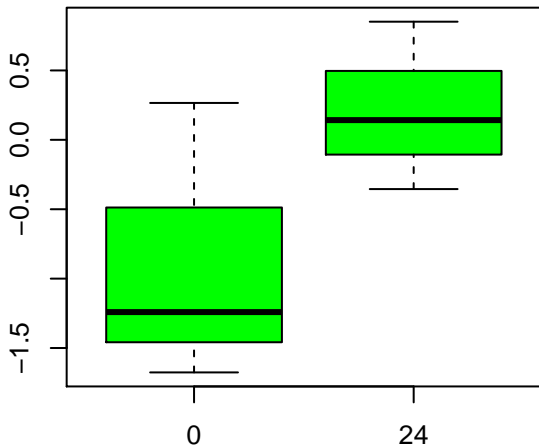

HCT15

**leucylserine**

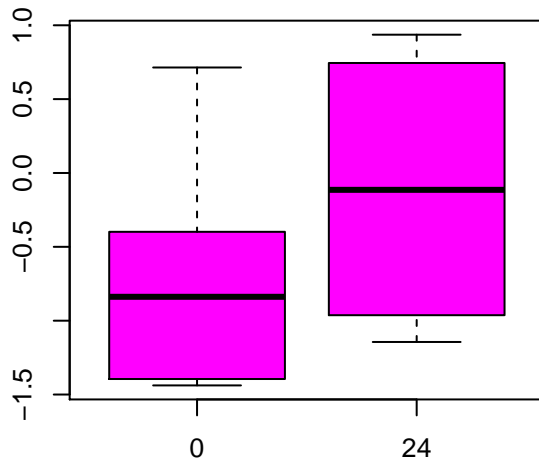

SKOV3

# leucylserine

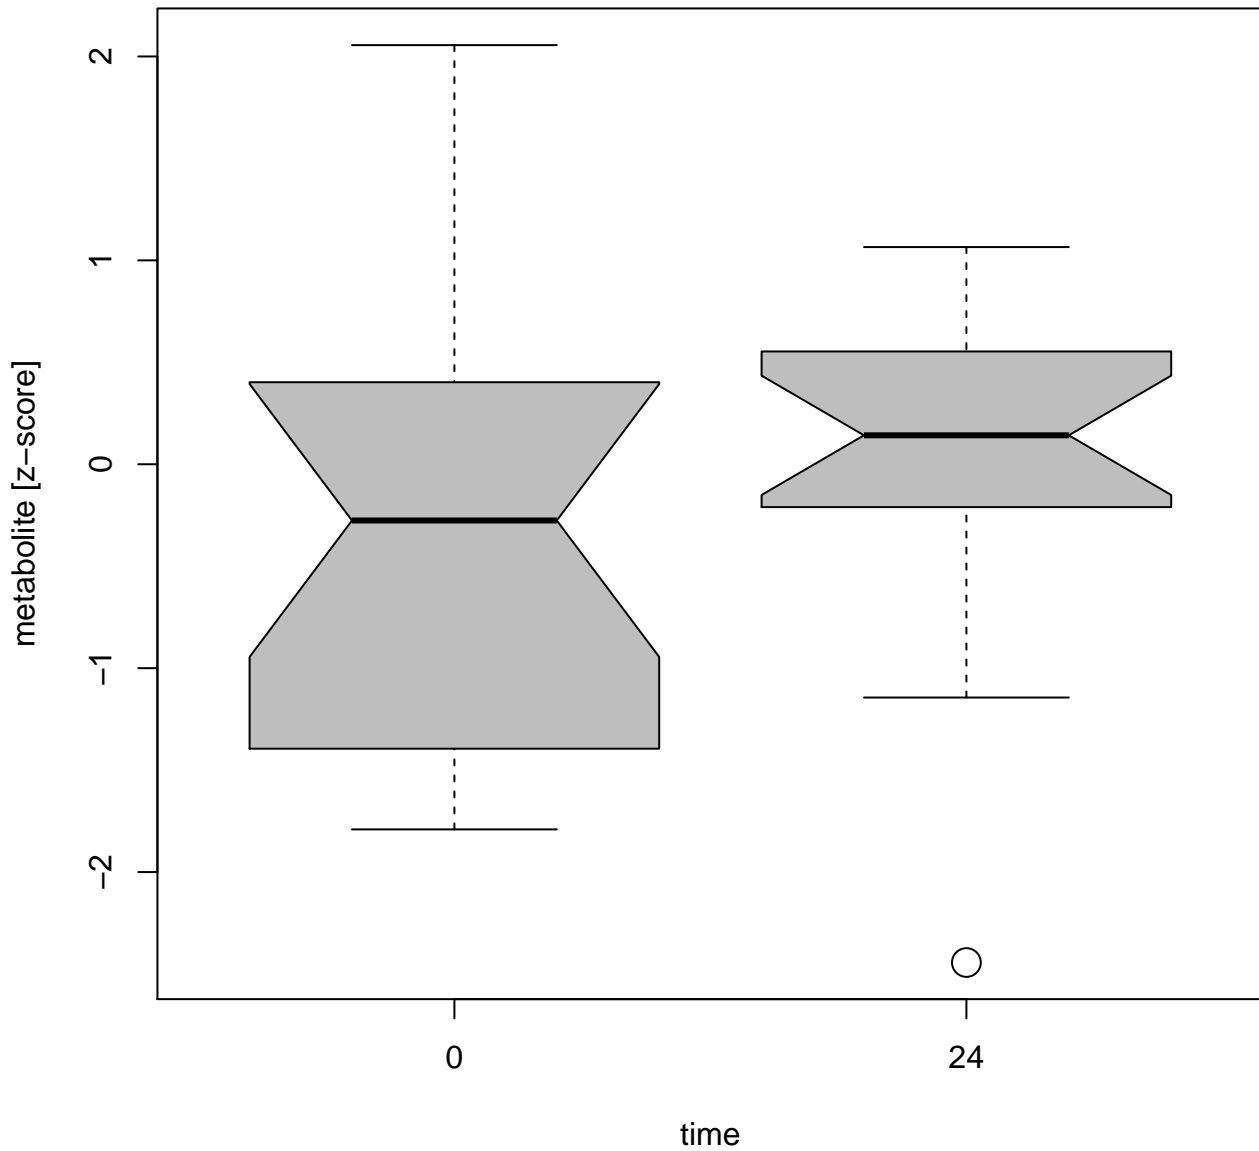

**linoleate (18:2n6)**

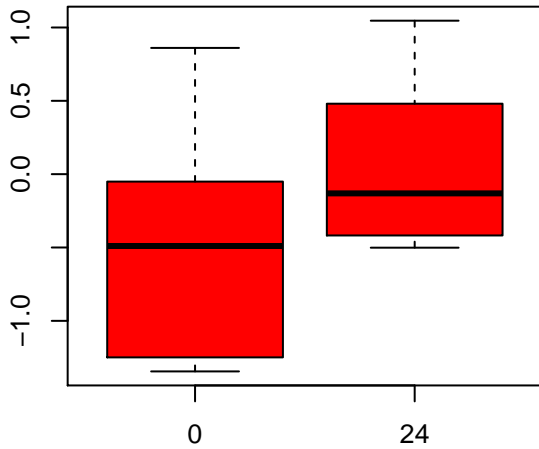

HCT116

**linoleate (18:2n6)**

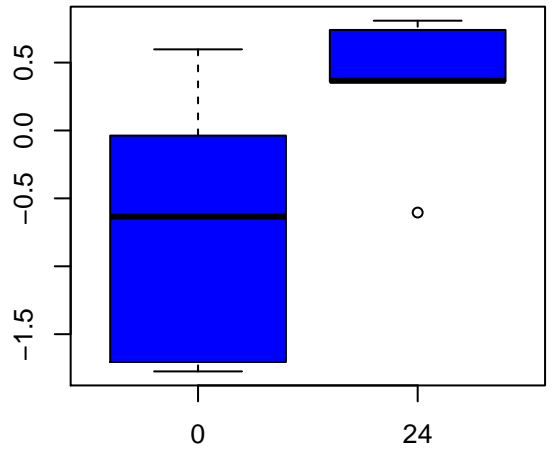

OVCAR

**linoleate (18:2n6)**

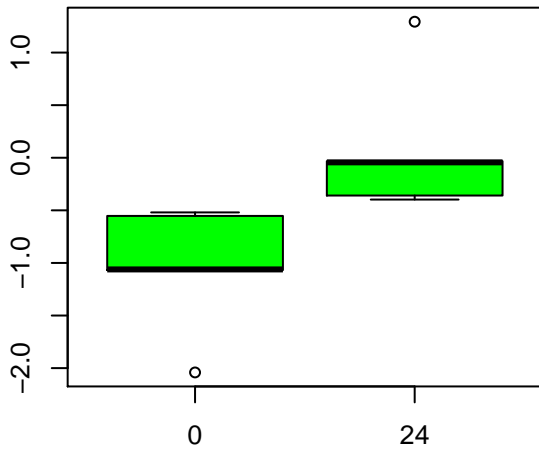

HCT15

**linoleate (18:2n6)**

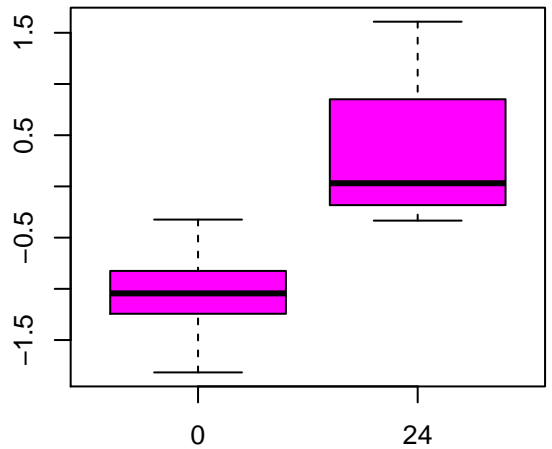

SKOV3

# linoleate (18:2n6)

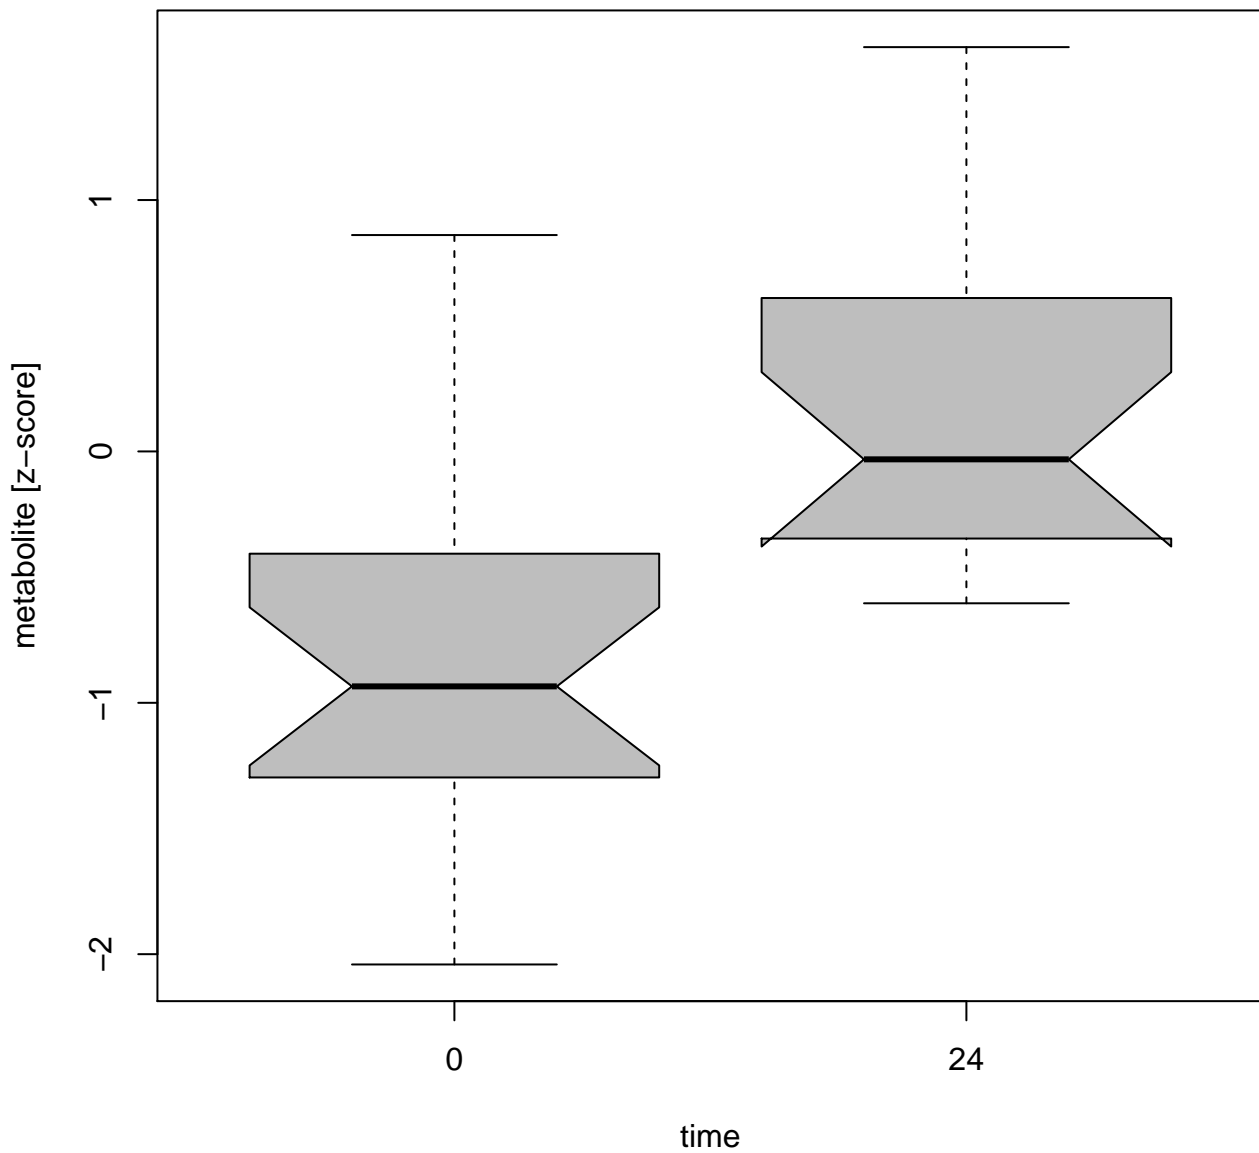

linolenate [alpha or gamma (18:3n3 or 6)]

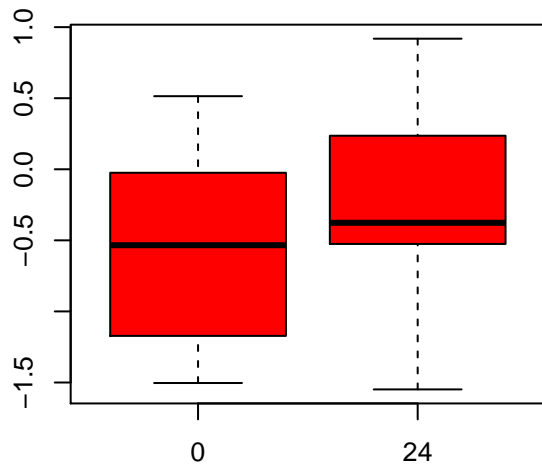

HCT116

linolenate [alpha or gamma (18:3n3 or 6)]

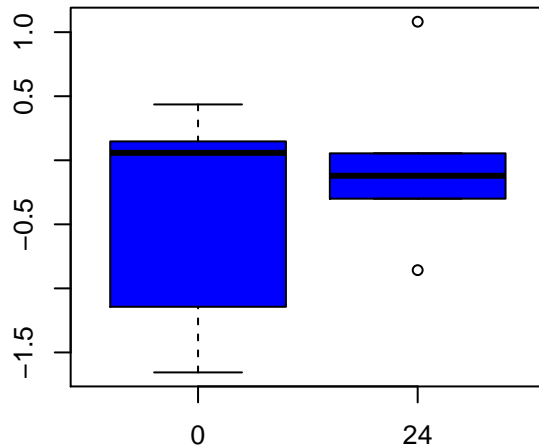

OVCAR

linolenate [alpha or gamma (18:3n3 or 6)]

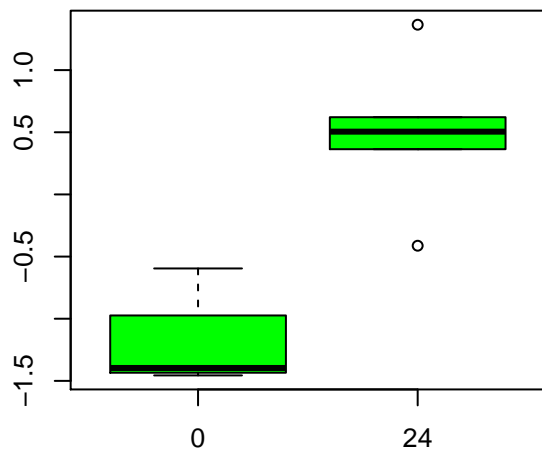

HCT15

linolenate [alpha or gamma (18:3n3 or 6)]

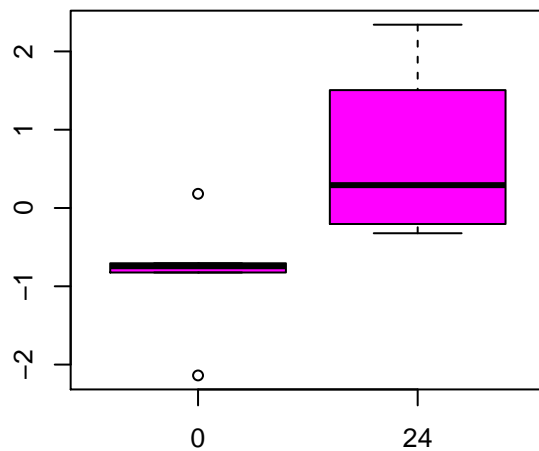

SKOV3

# linolenate [alpha or gamma (18:3n3 or 6)]

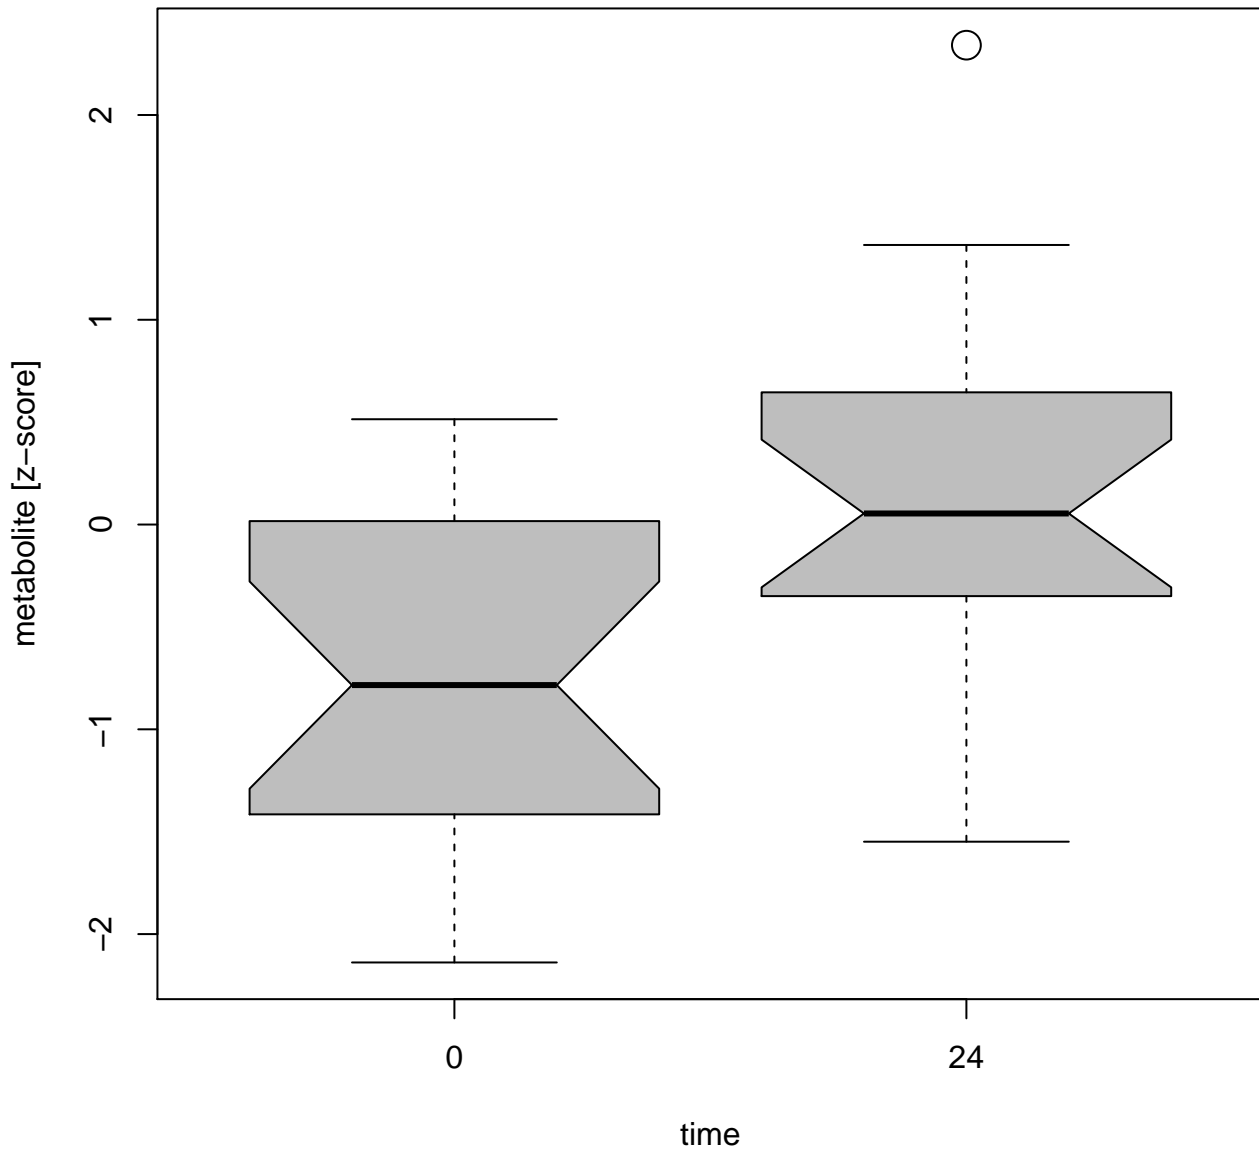

**lysine**

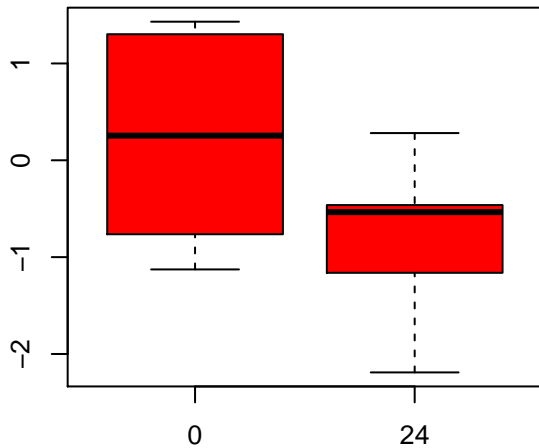

HCT116

**lysine**

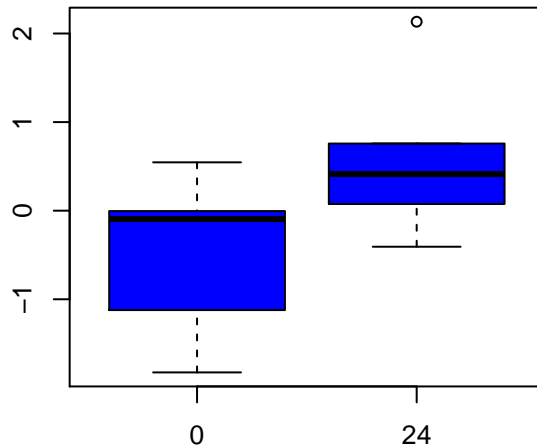

OVCAR

**lysine**

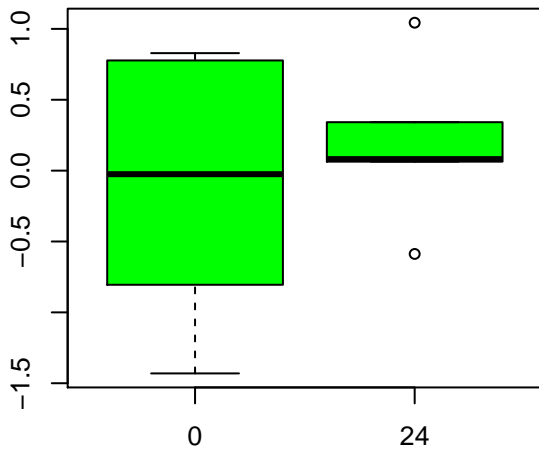

HCT15

**lysine**

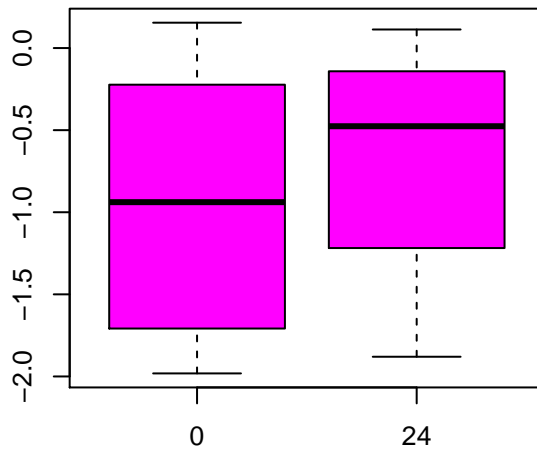

SKOV3



# lysine

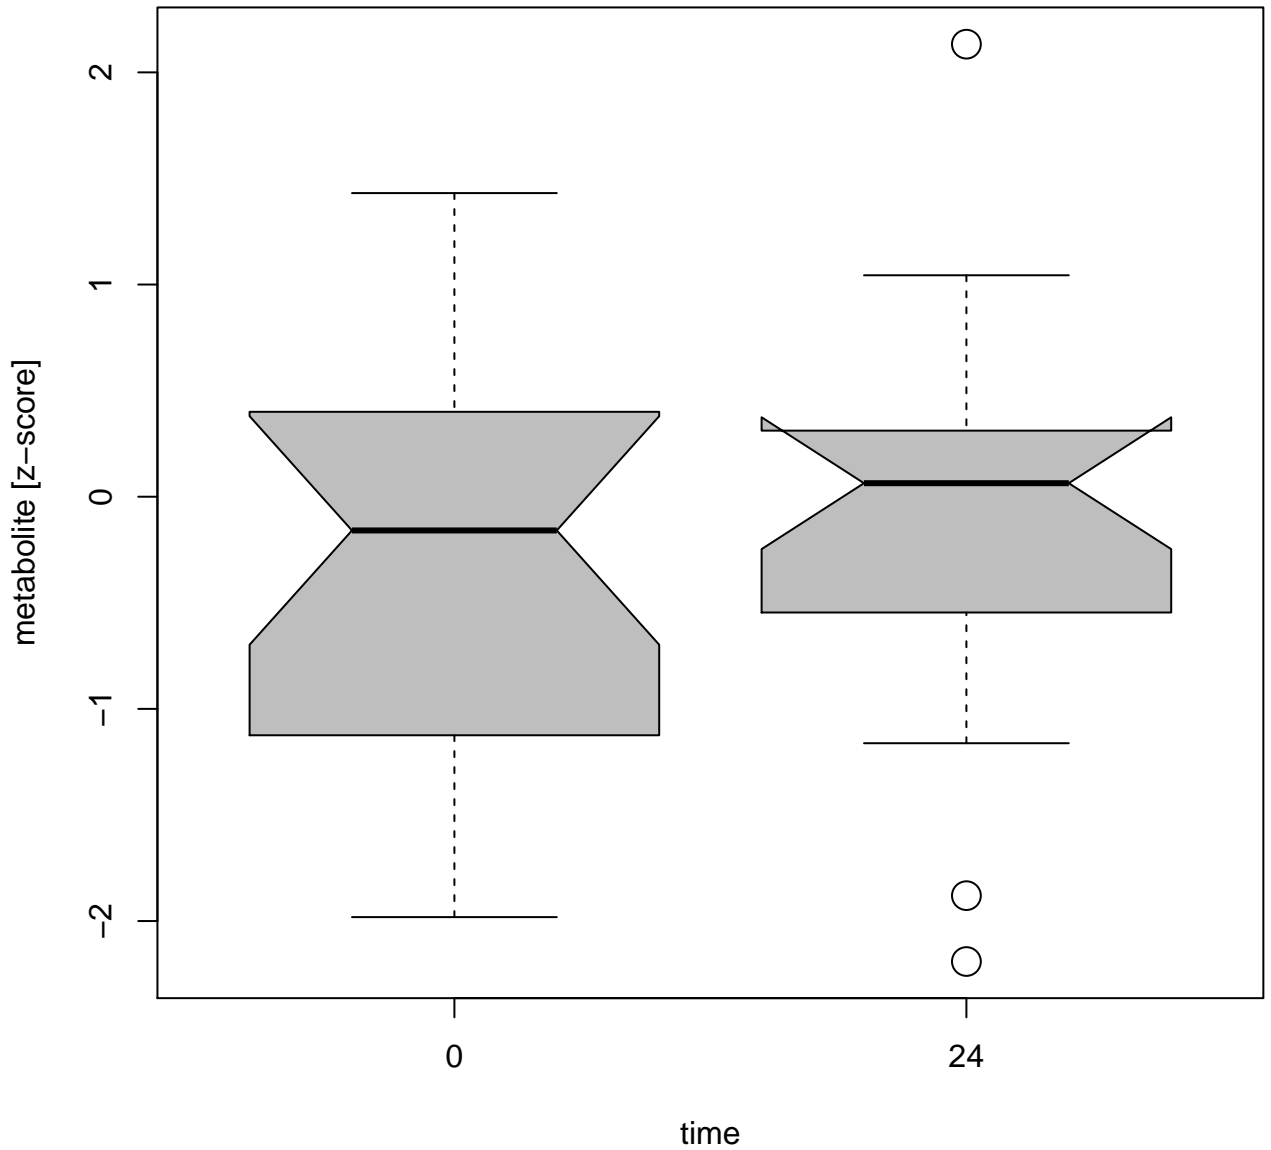

**methionine**

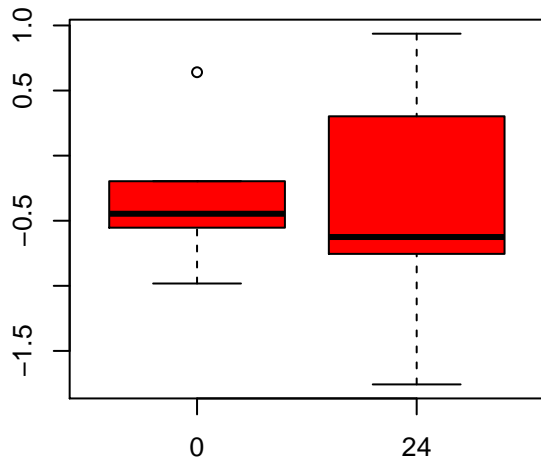

HCT116

**methionine**

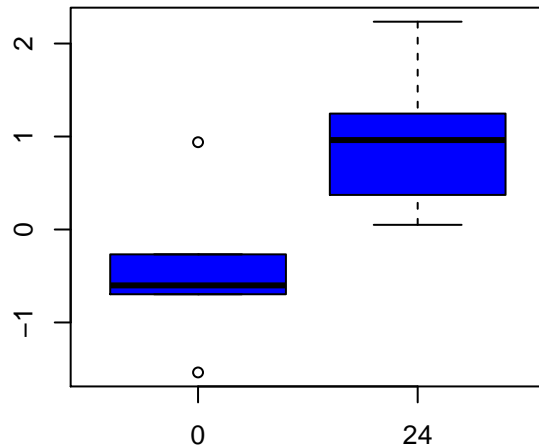

OVCAR

**methionine**

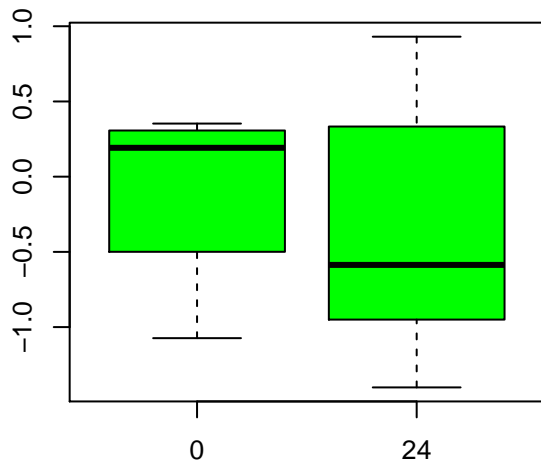

HCT15

**methionine**

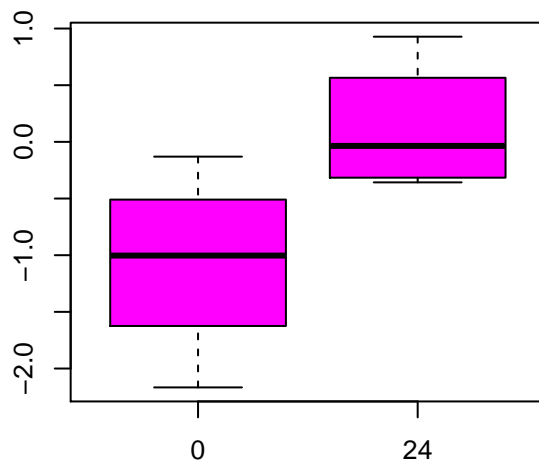

SKOV3

# methionine

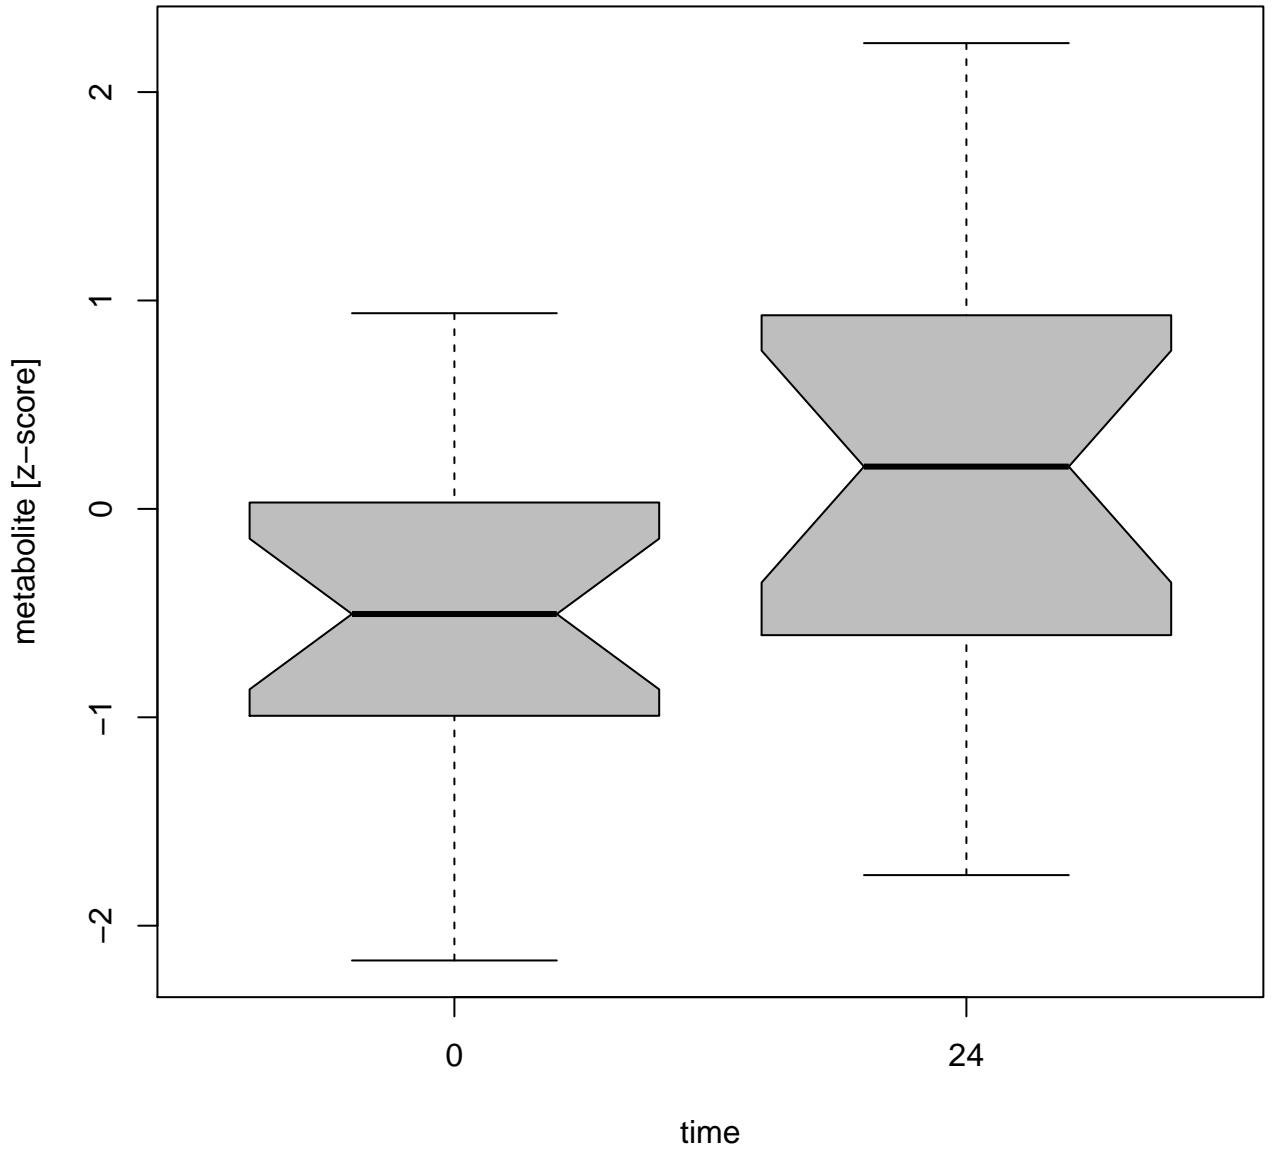

**methionine sulfoxide**

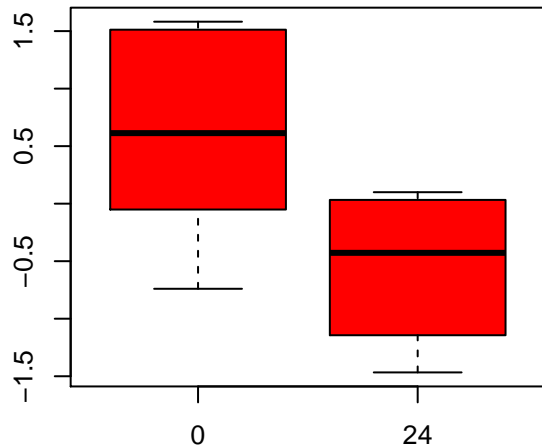

HCT116

**methionine sulfoxide**

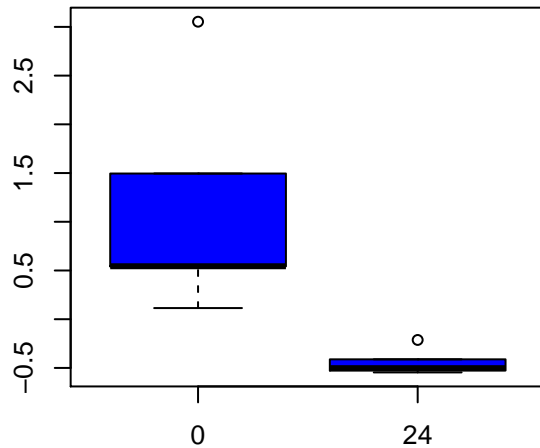

OVCAR

**methionine sulfoxide**

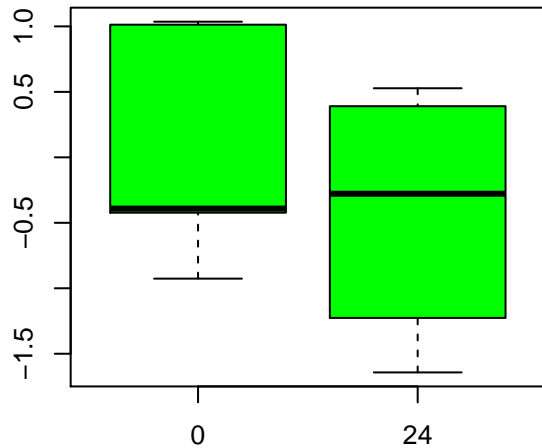

HCT15

**methionine sulfoxide**

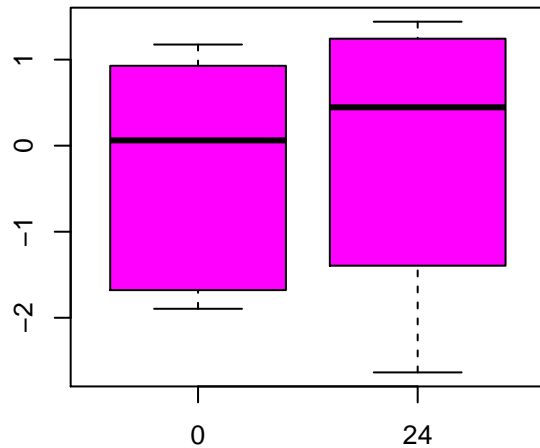

SKOV3

# methionine sulfoxide

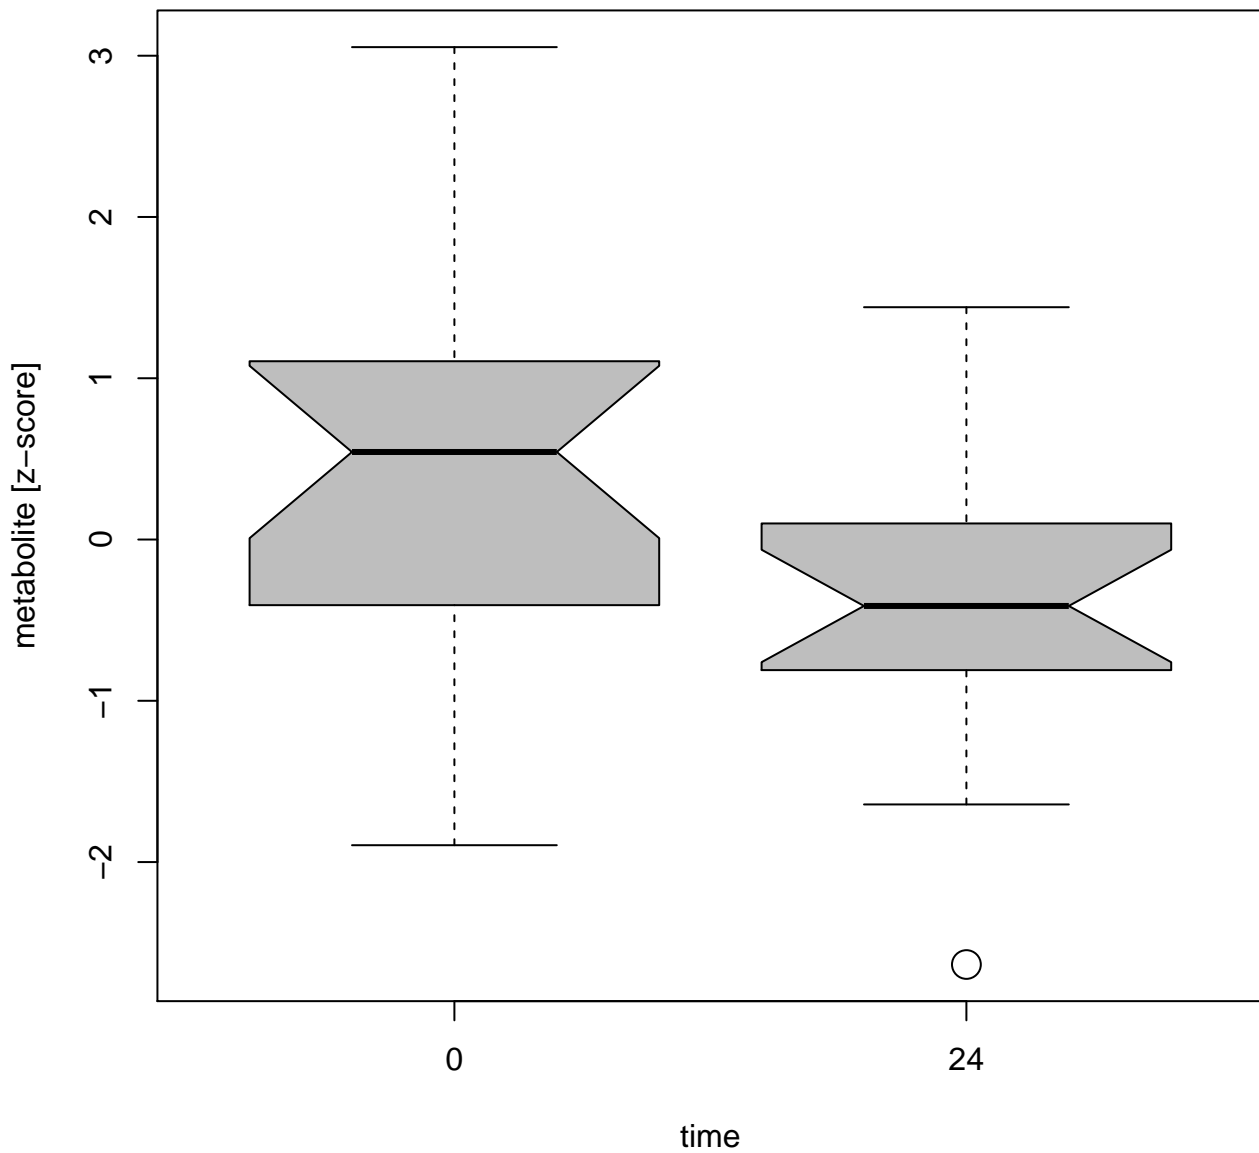

**myo-inositol**

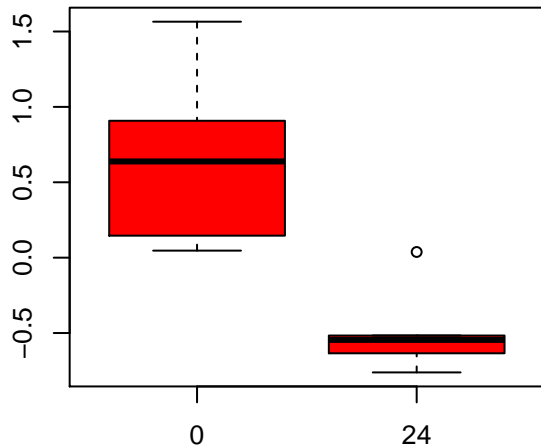

HCT116

**myo-inositol**

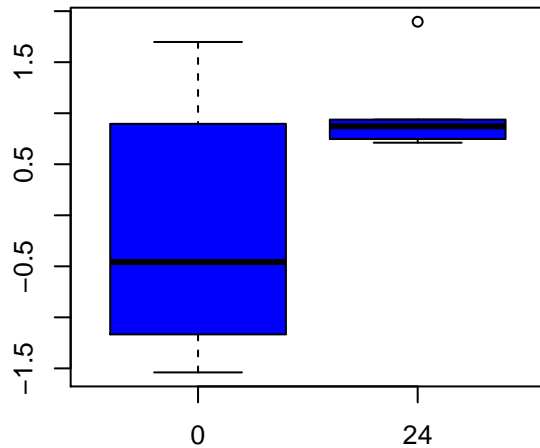

OVCAR

**myo-inositol**

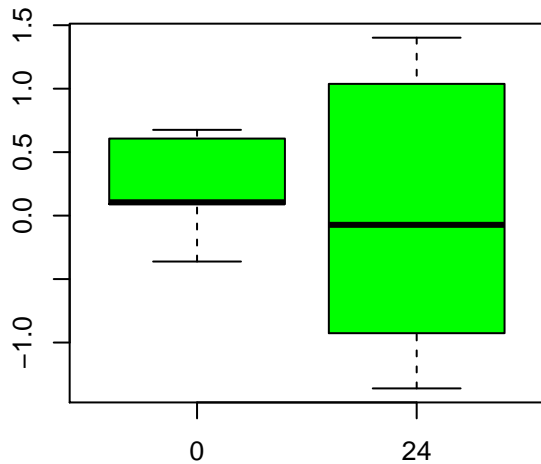

HCT15

**myo-inositol**

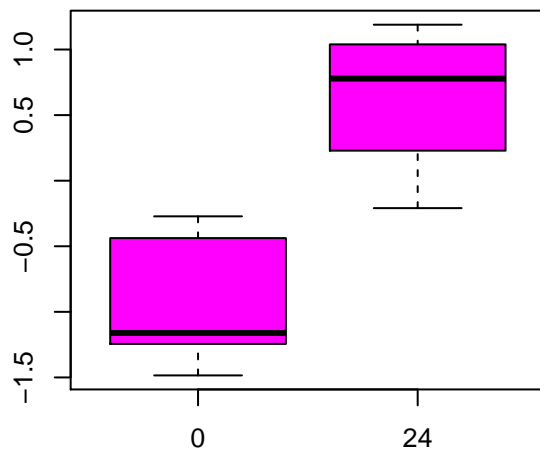

SKOV3

# myo-inositol

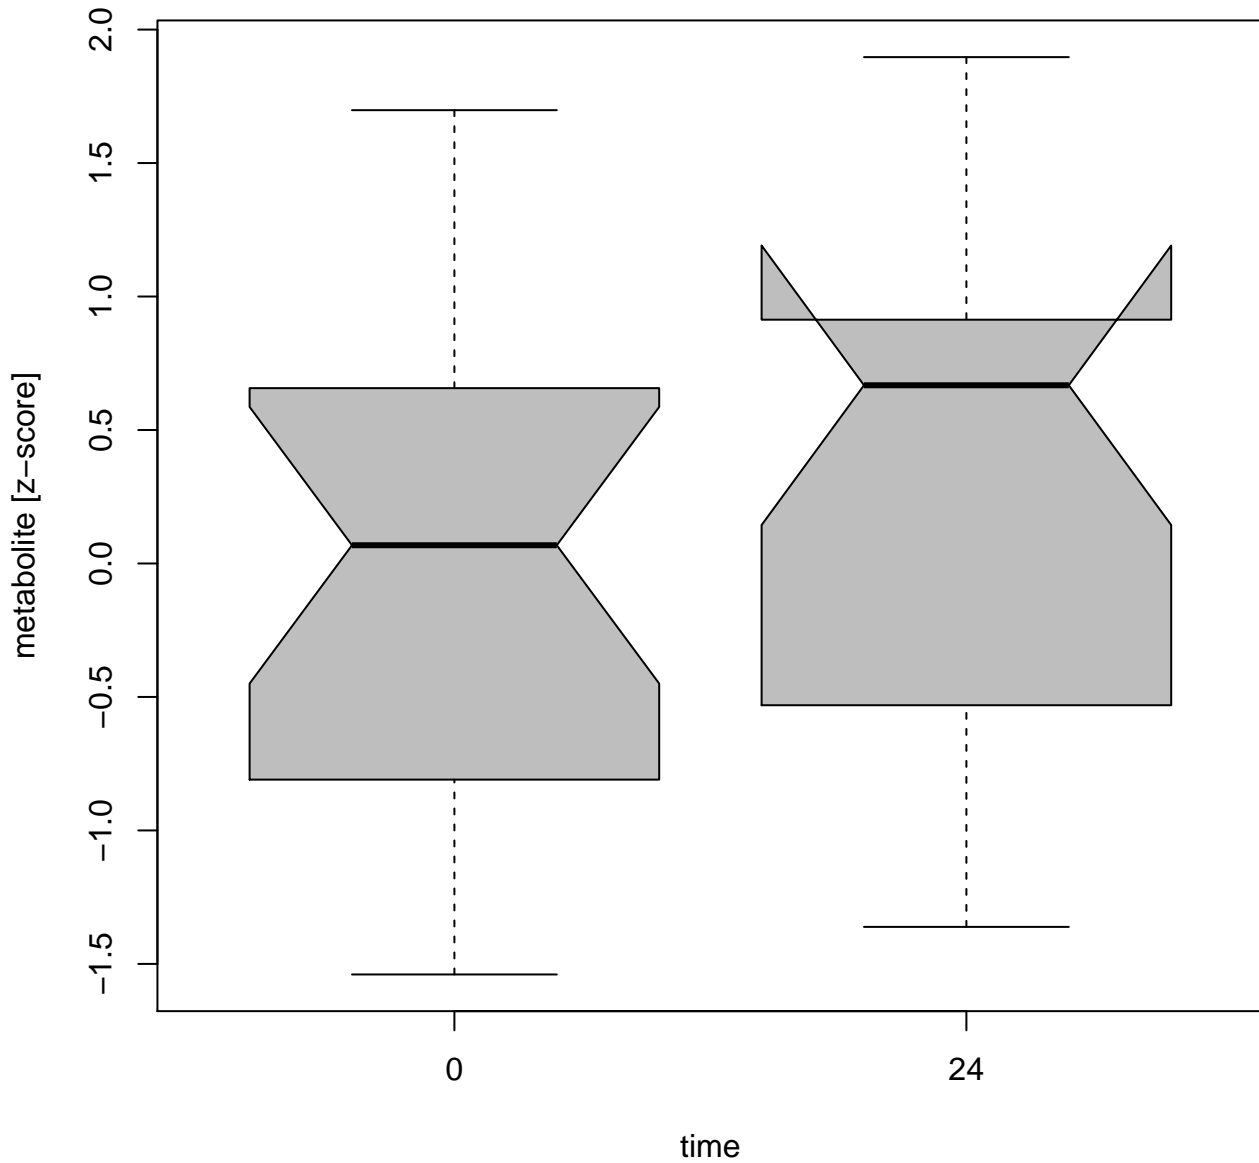

**N-acetylaspartate (NAA)**

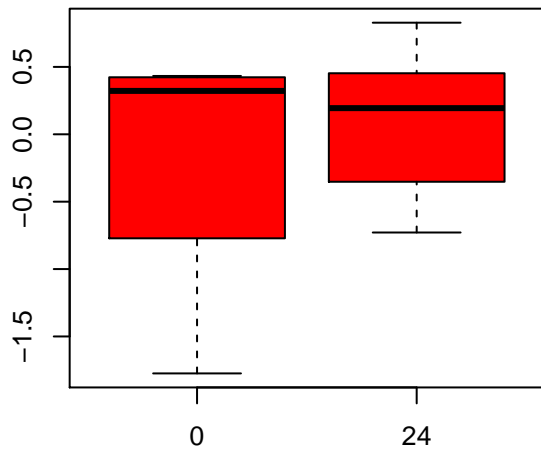

HCT116

**N-acetylaspartate (NAA)**

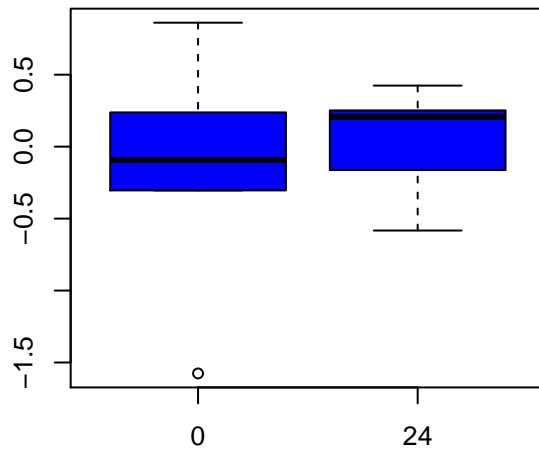

OVCAR

**N-acetylaspartate (NAA)**

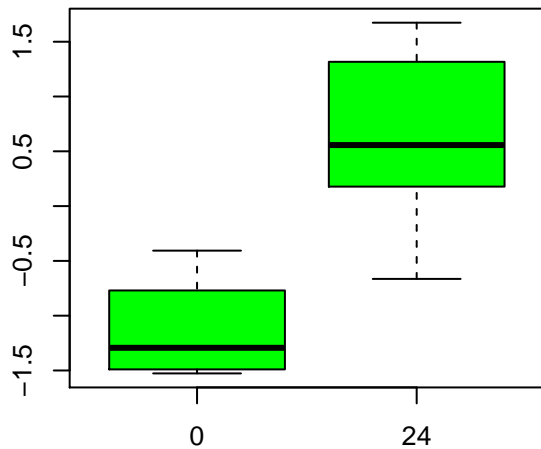

HCT15

**N-acetylaspartate (NAA)**

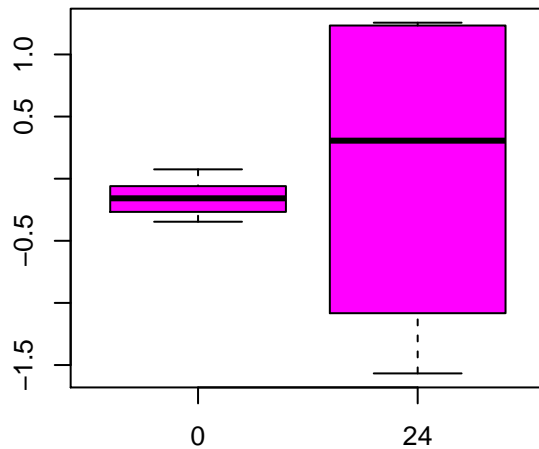

SKOV3



# N-acetylaspartate (NAA)

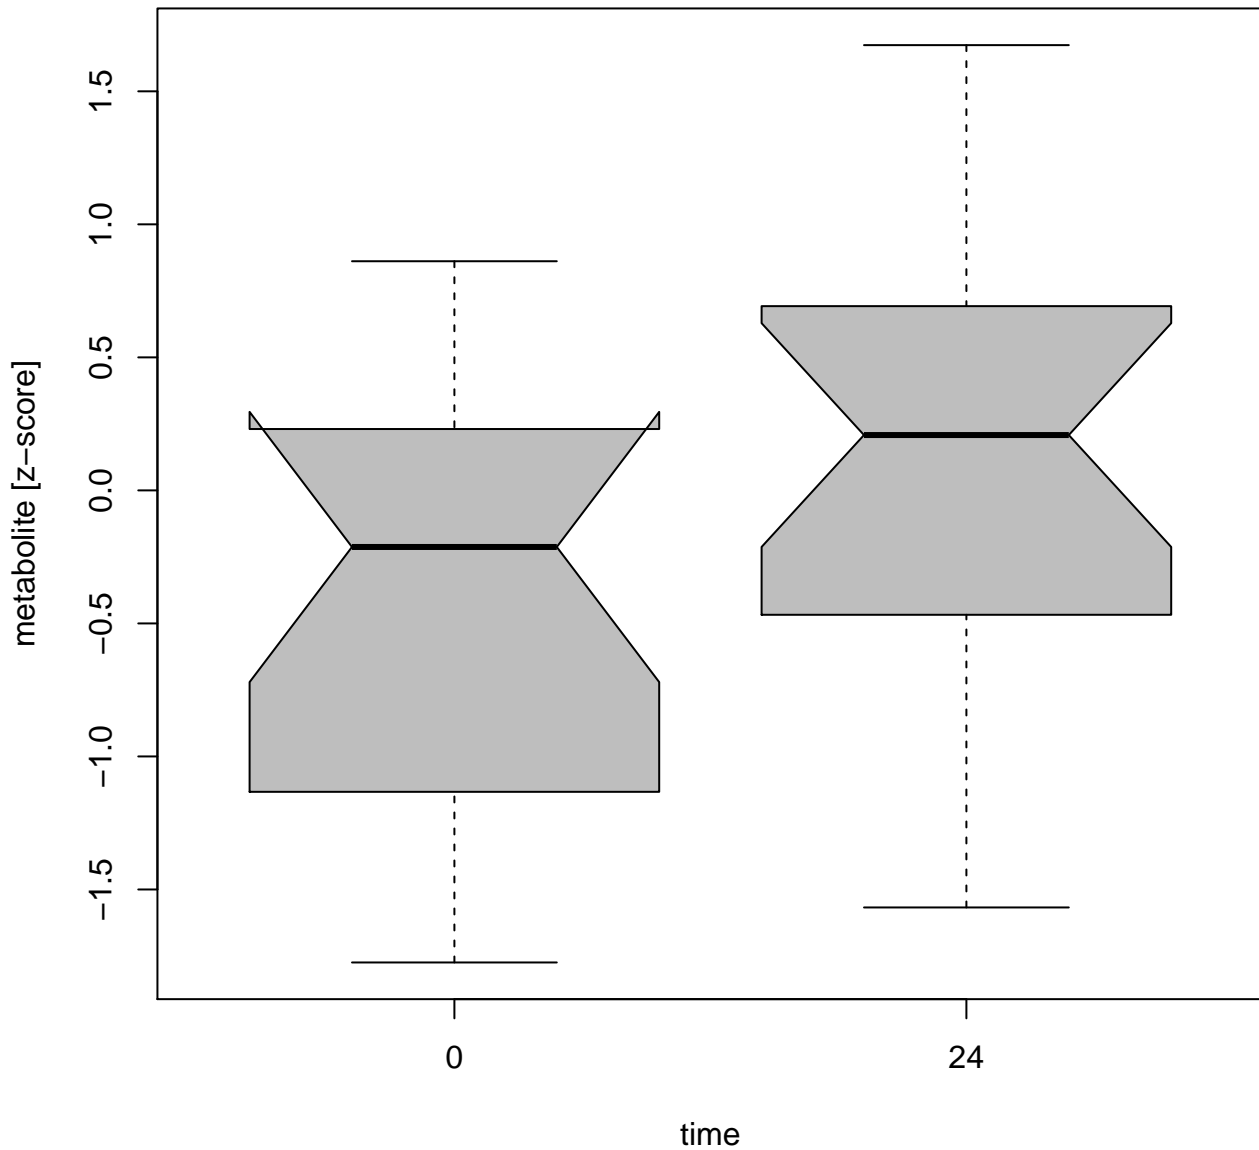

**N-acetylglutamate**

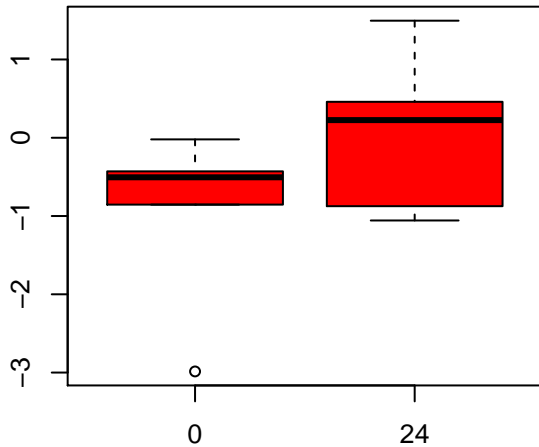

HCT116

**N-acetylglutamate**

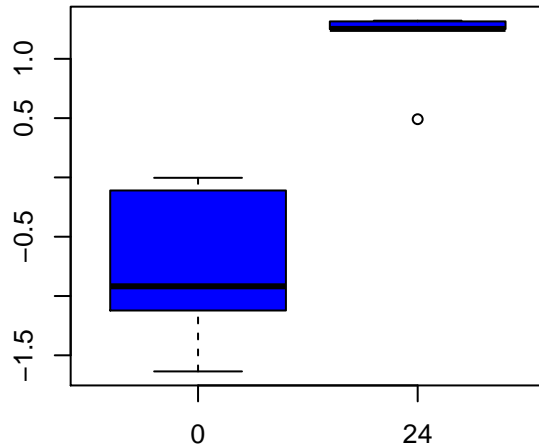

OVCAR

**N-acetylglutamate**

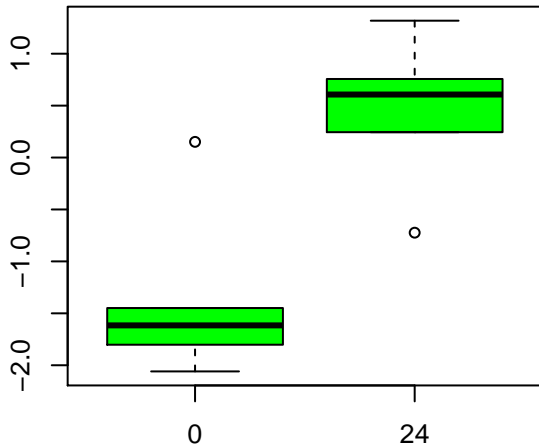

HCT15

**N-acetylglutamate**

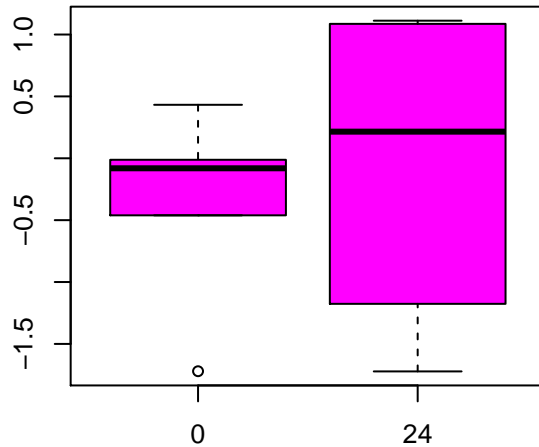

SKOV3

# N-acetylglutamate

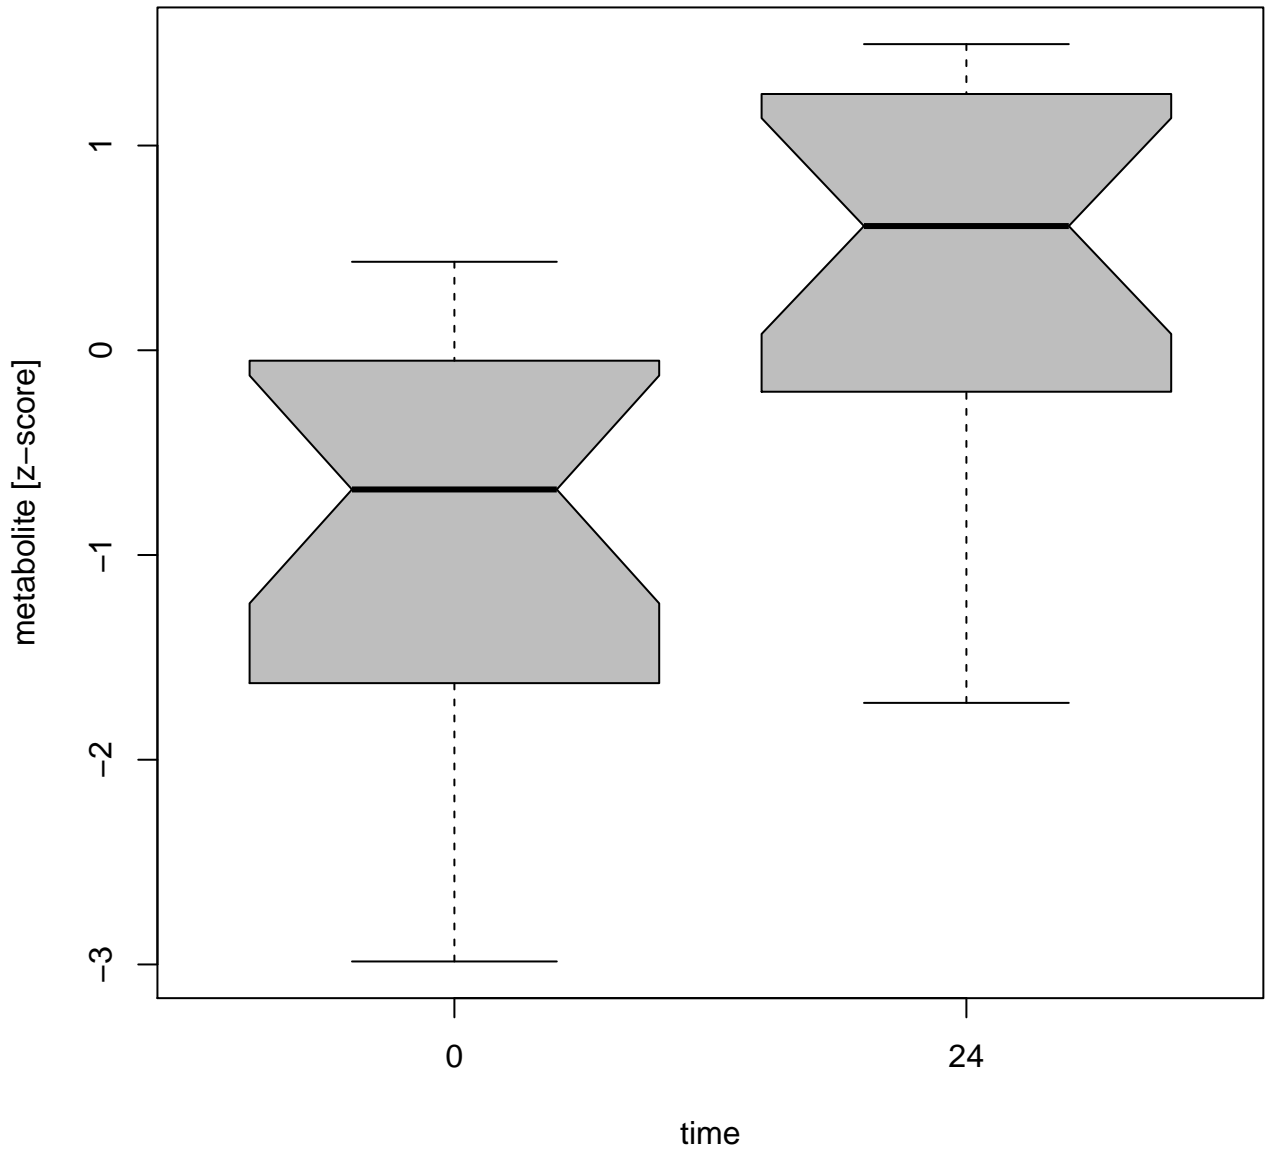

**N-acetylneuraminate**

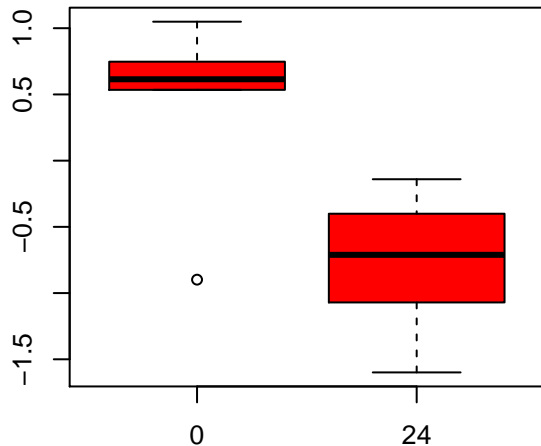

HCT116

**N-acetylneuraminate**

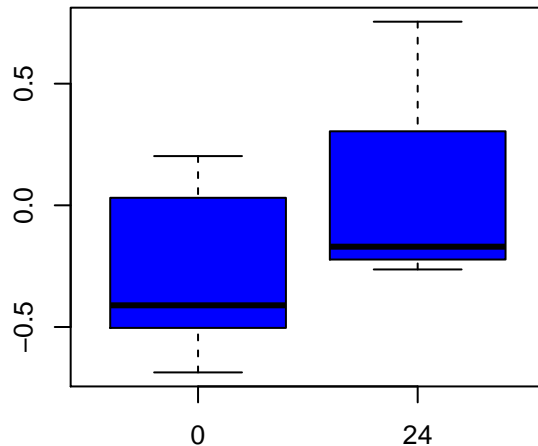

OVCAR

**N-acetylneuraminate**

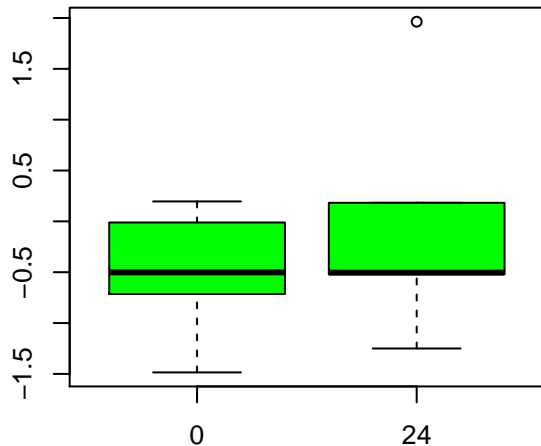

HCT15

**N-acetylneuraminate**

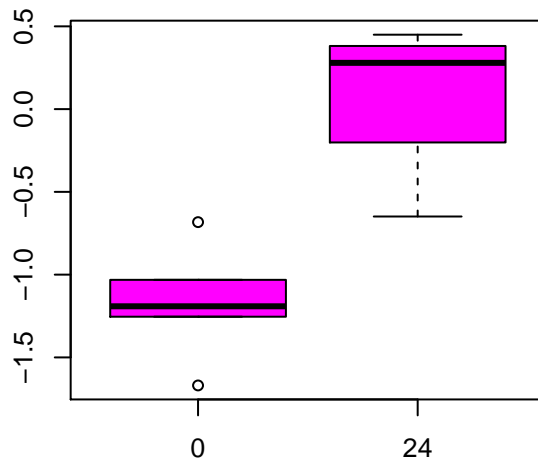

SKOV3

# N-acetylneuraminate

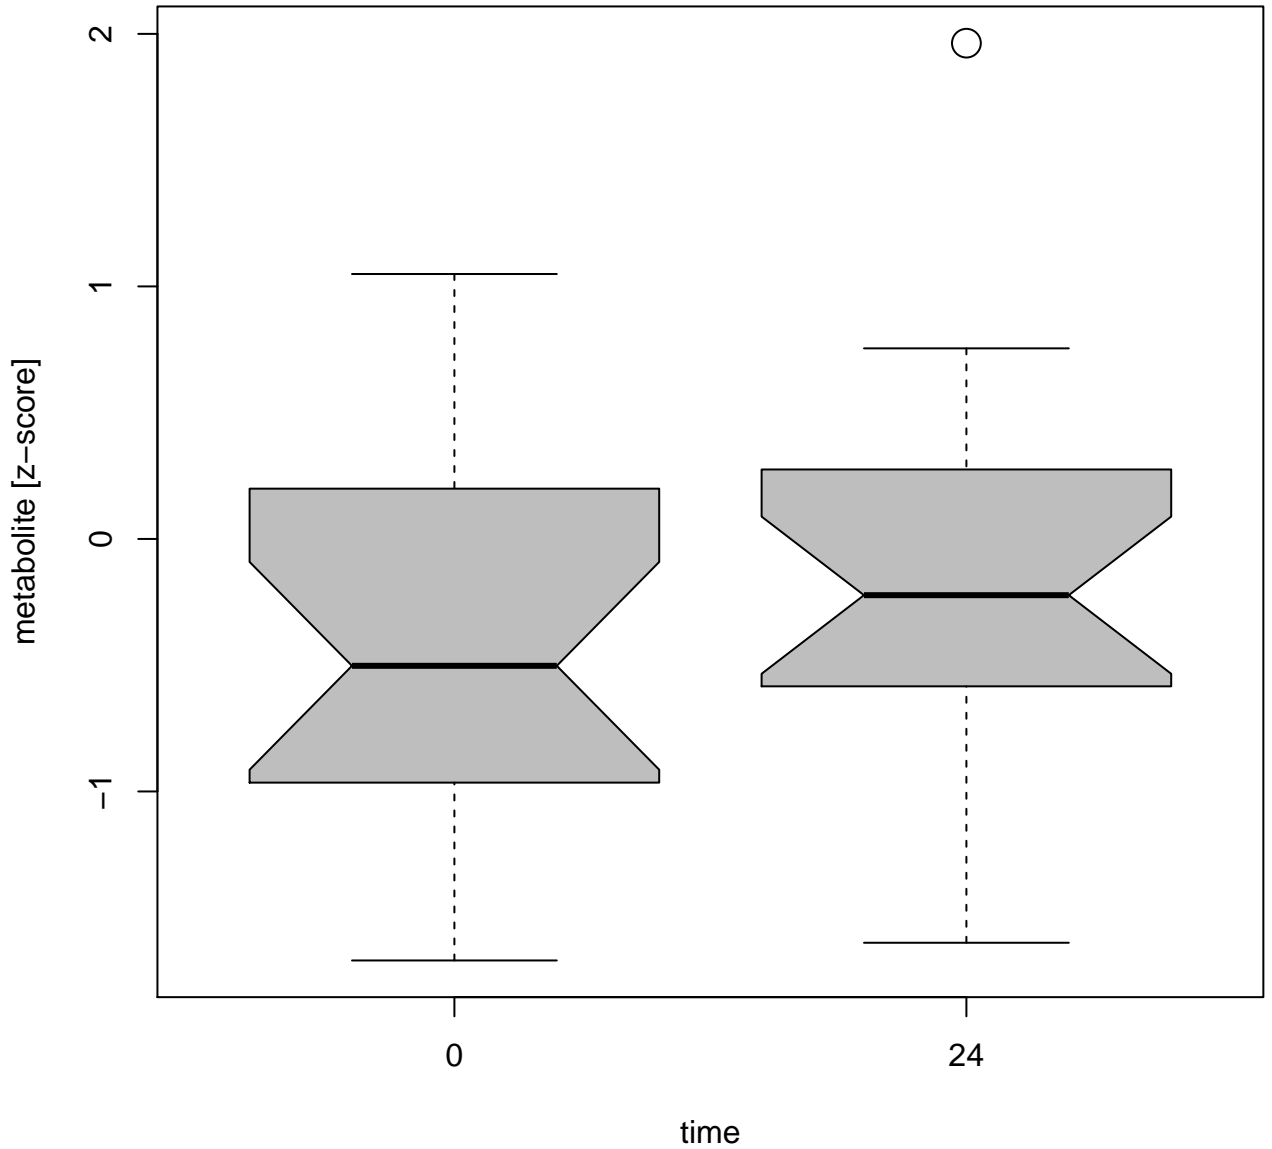

**N-acetylserine**

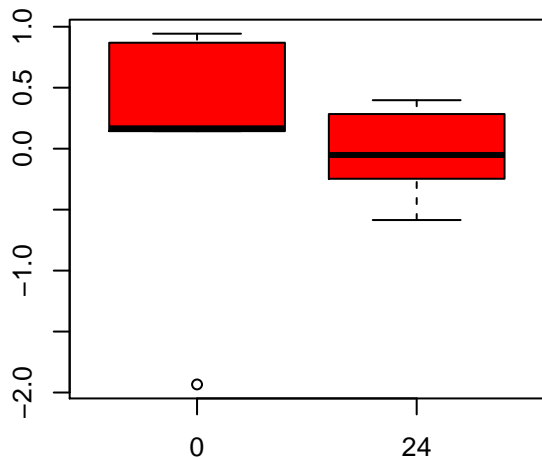

HCT116

**N-acetylserine**

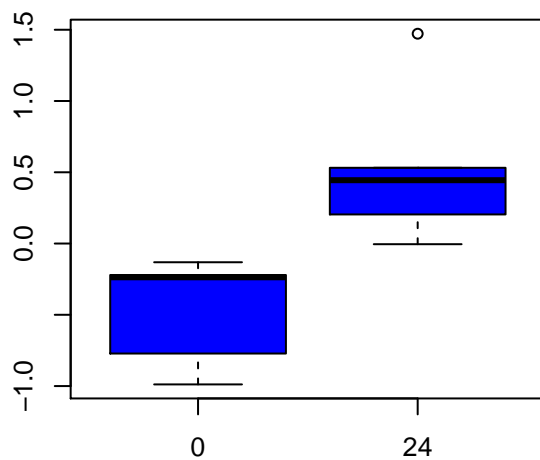

OVCAR

**N-acetylserine**

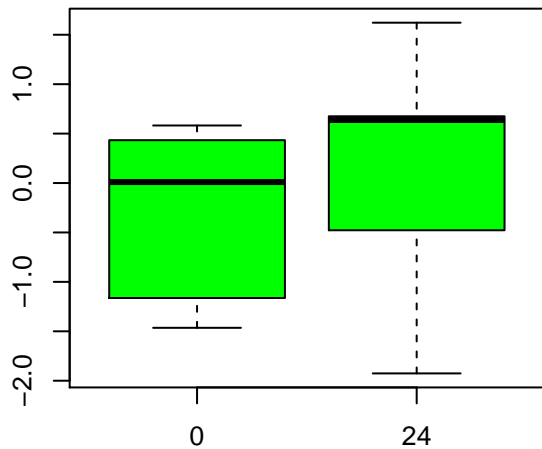

HCT15

**N-acetylserine**

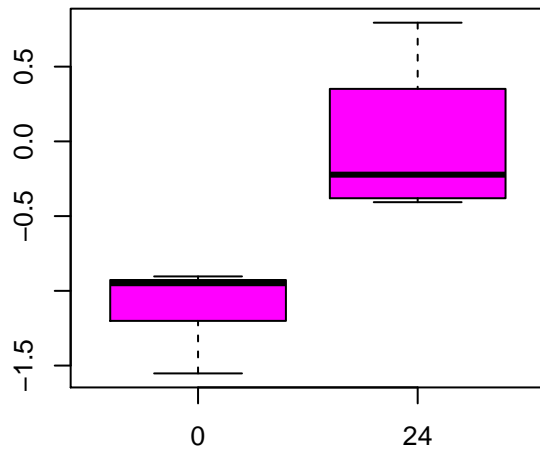

SKOV3

# N-acetylserine

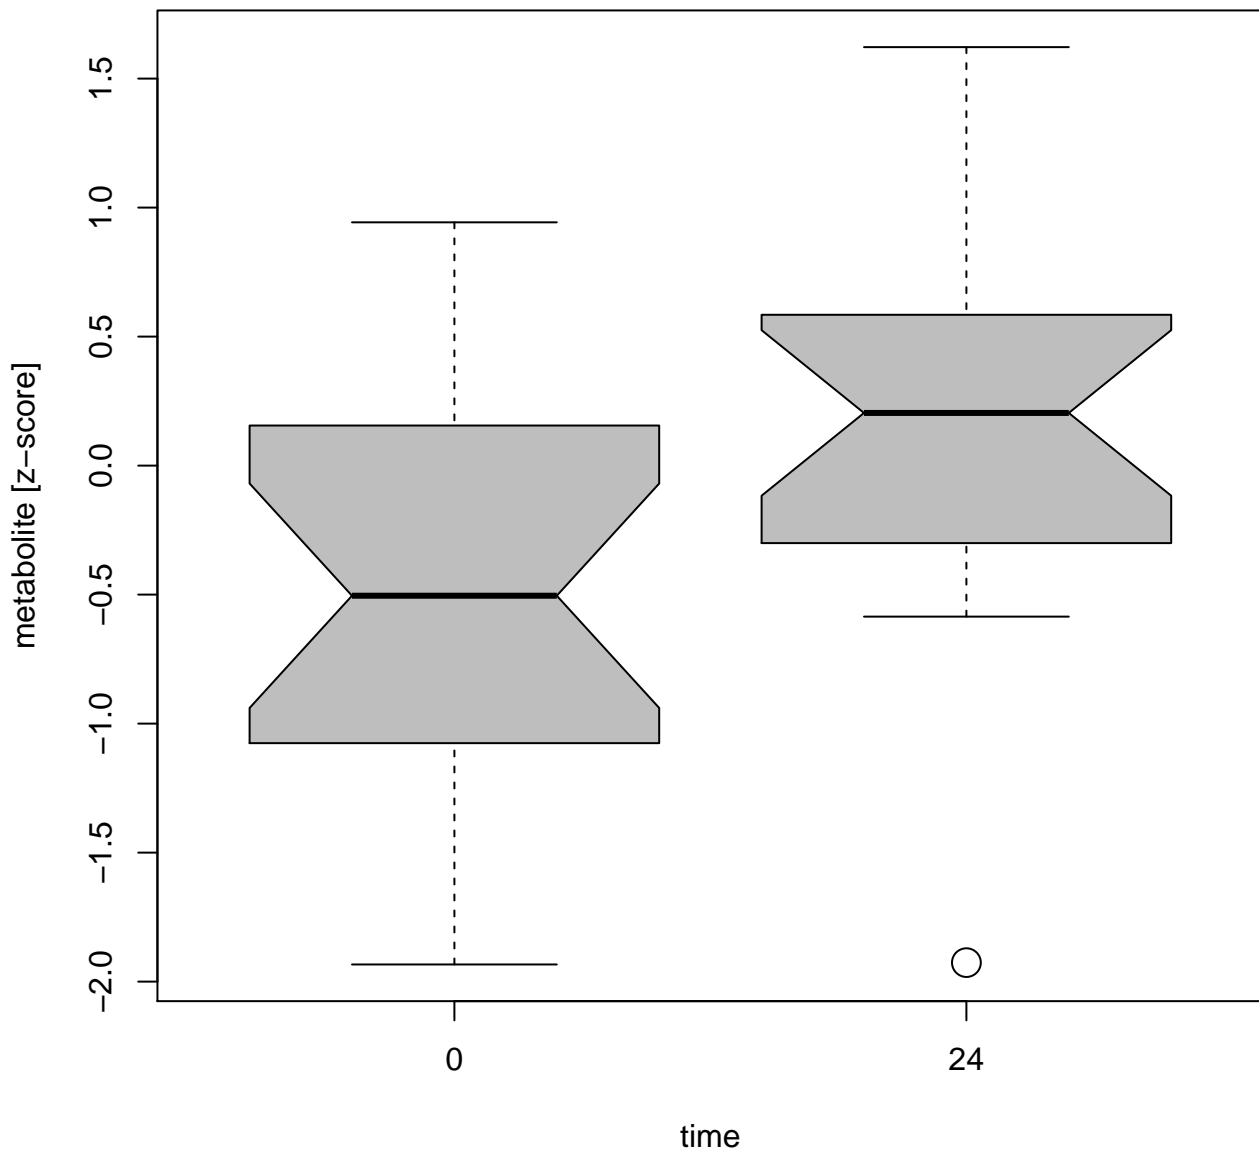

**nicotinamide**

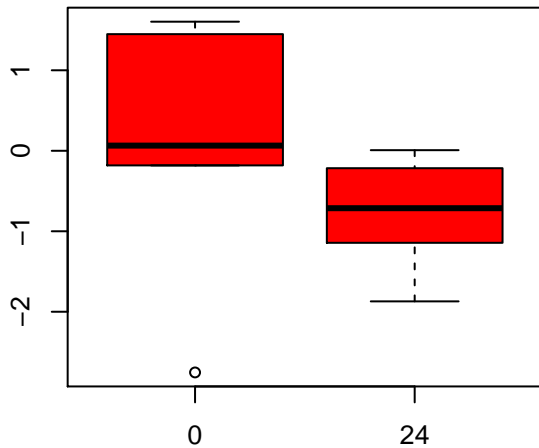

HCT116

**nicotinamide**

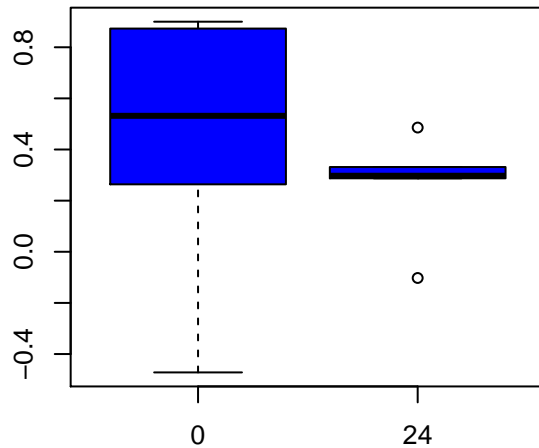

OVCAR

**nicotinamide**

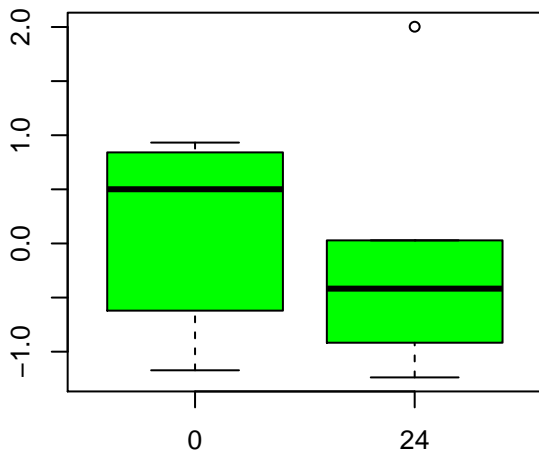

HCT15

**nicotinamide**

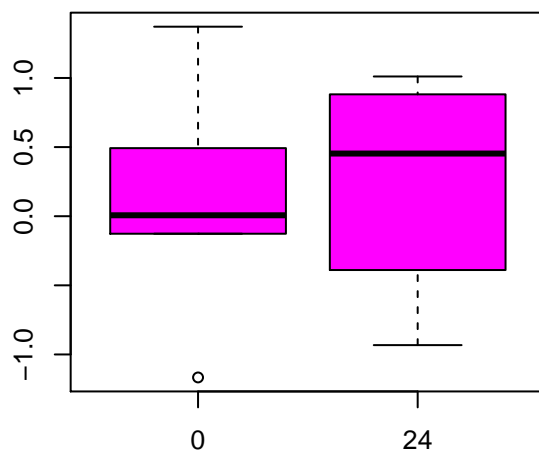

SKOV3



# nicotinamide

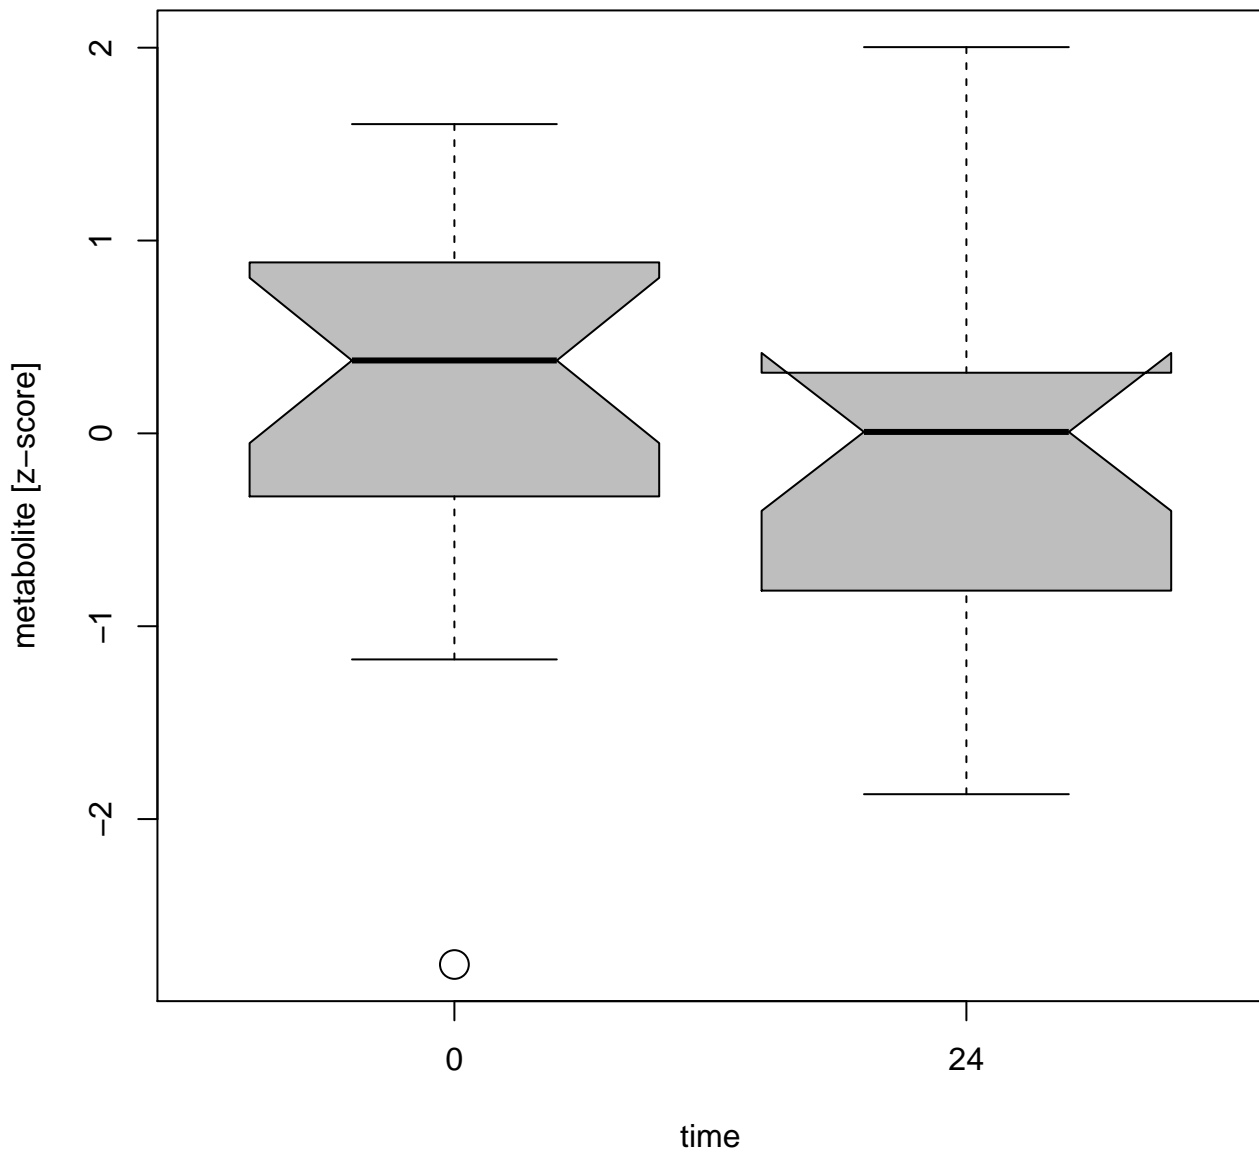

nicotinamide adenine dinucleotide (NAD<sup>+</sup>)

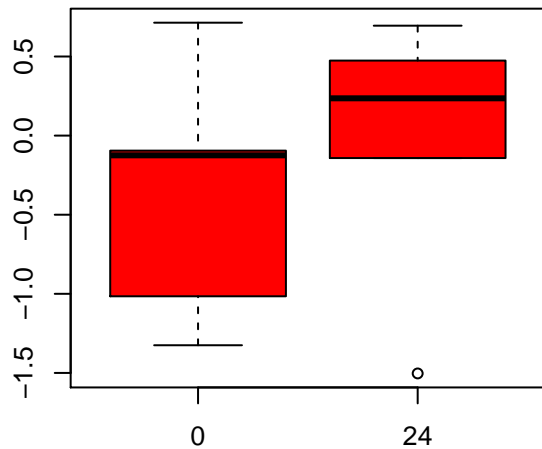

HCT116

nicotinamide adenine dinucleotide (NAD<sup>+</sup>)

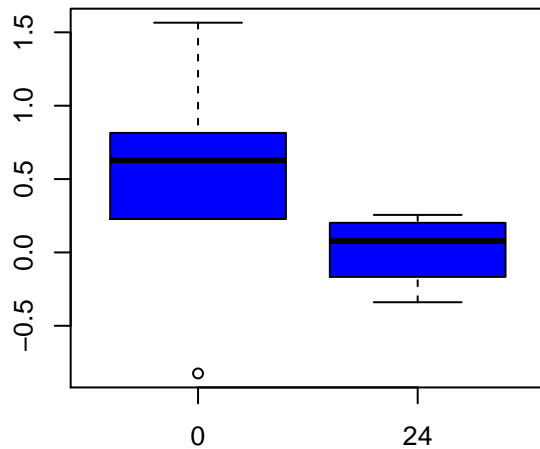

OVCAR

nicotinamide adenine dinucleotide (NAD<sup>+</sup>)

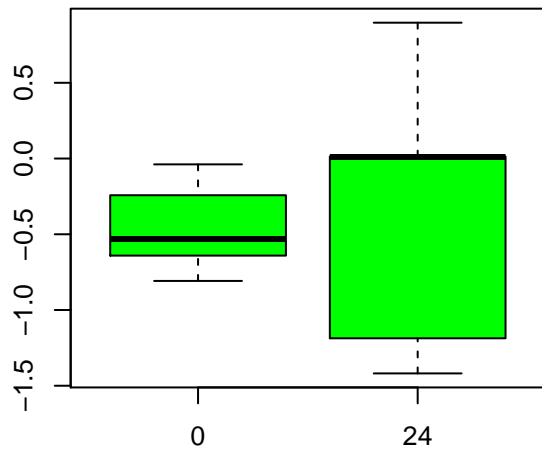

HCT15

nicotinamide adenine dinucleotide (NAD<sup>+</sup>)

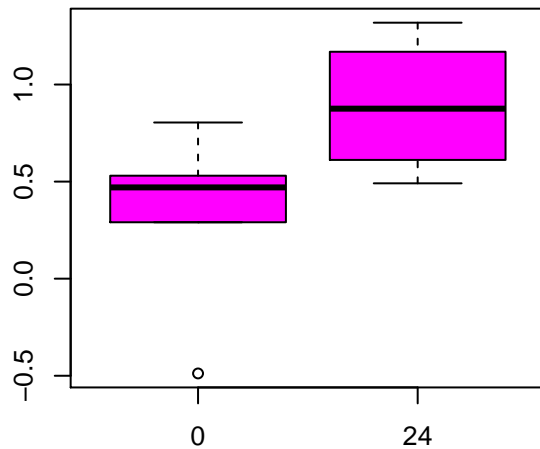

SKOV3

# nicotinamide adenine dinucleotide (NAD<sup>+</sup>)

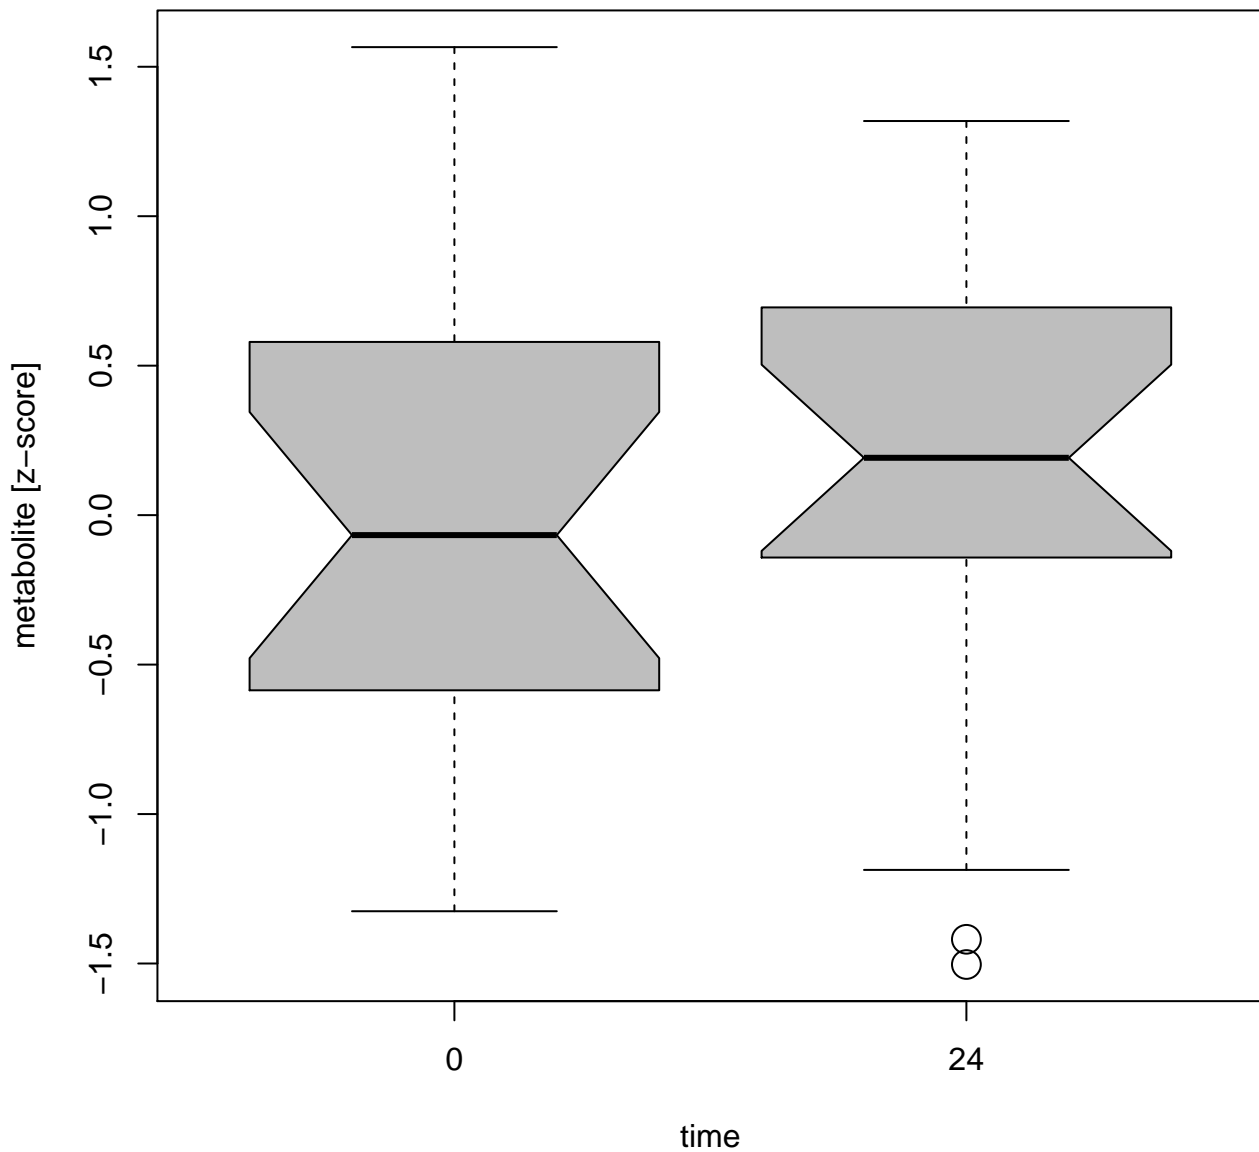

**oleate (18:1n9)**

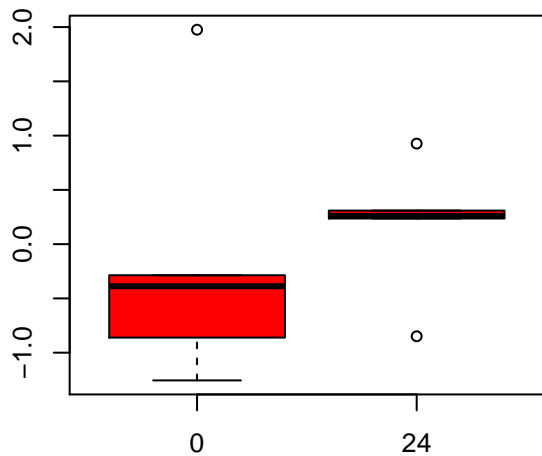

HCT116

**oleate (18:1n9)**

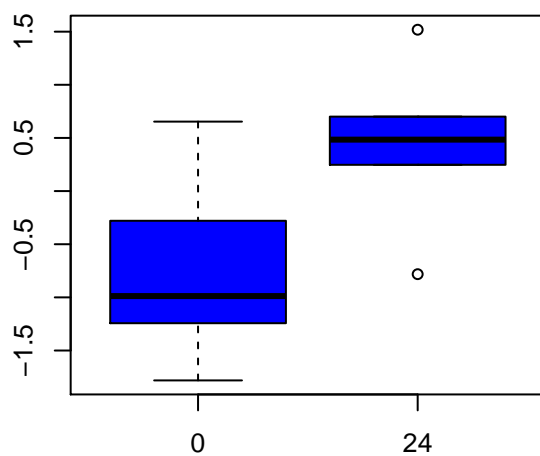

OVCAR

**oleate (18:1n9)**

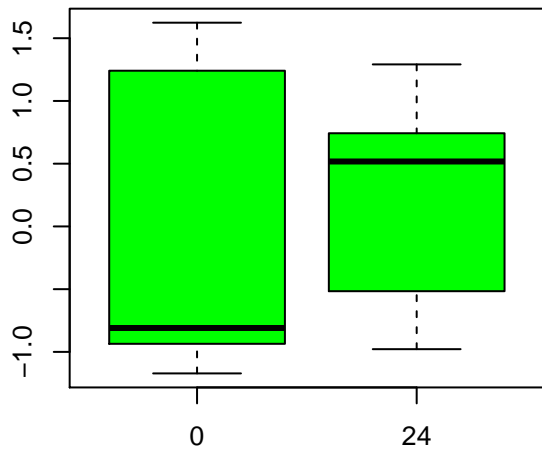

HCT15

**oleate (18:1n9)**

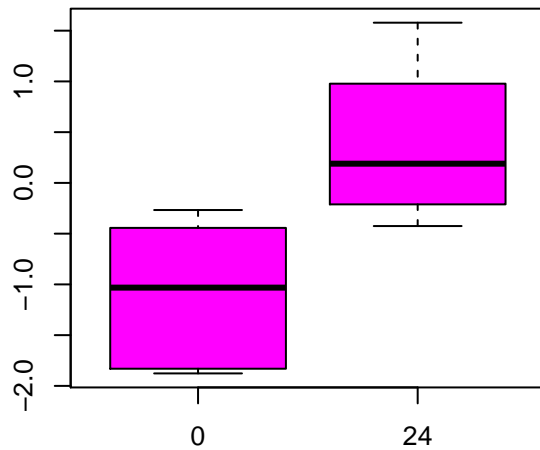

SKOV3

# oleate (18:1n9)

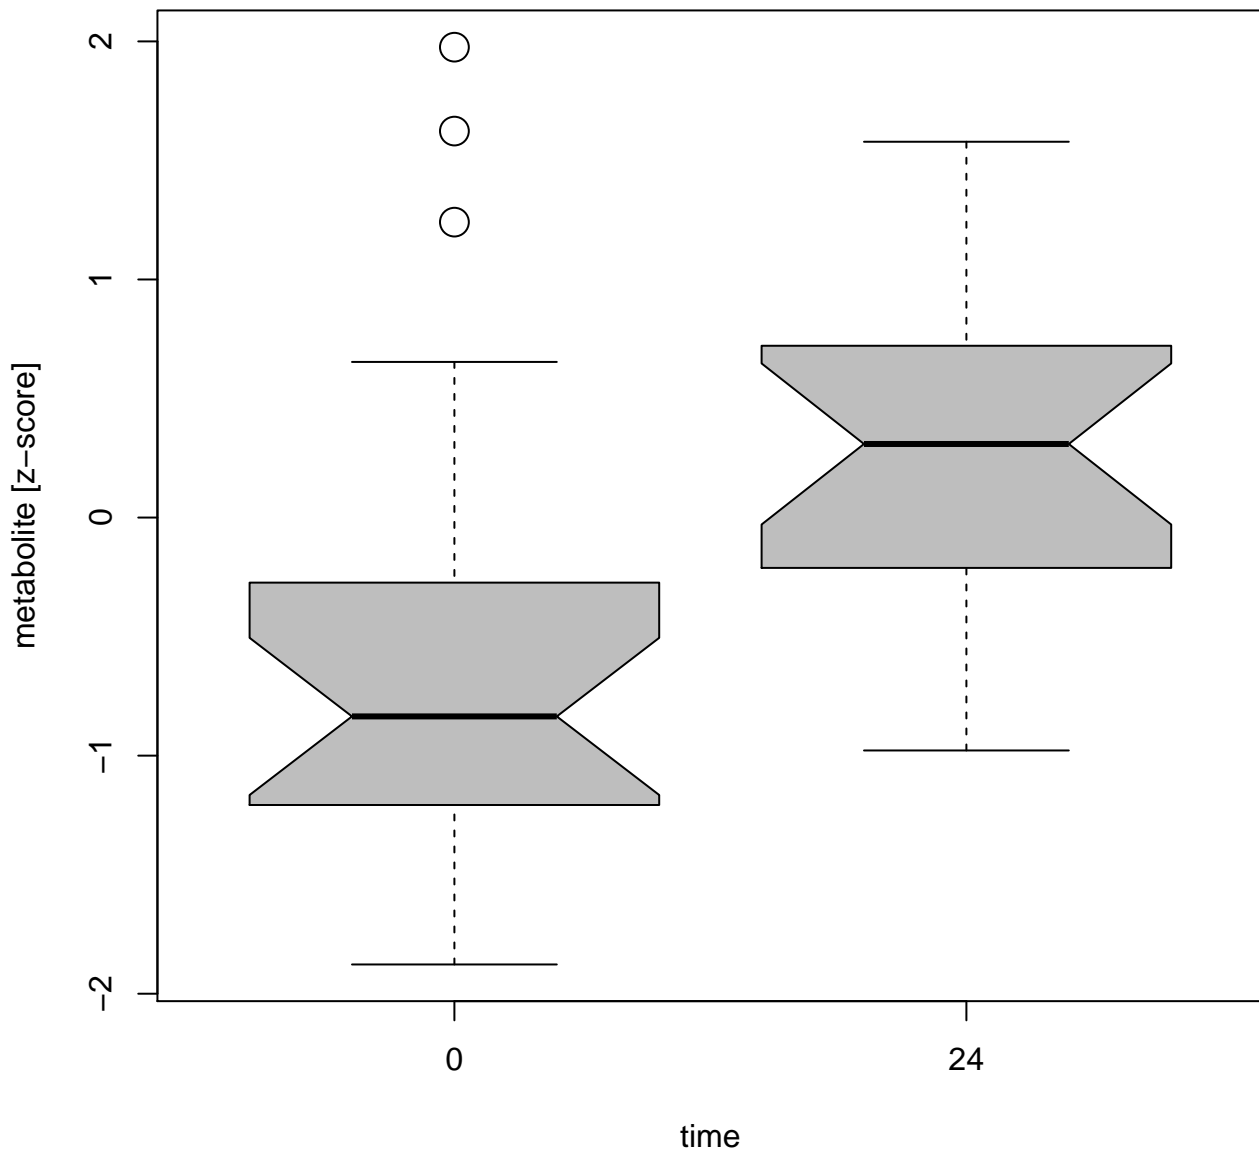

**palmitoleate (16:1n7)**

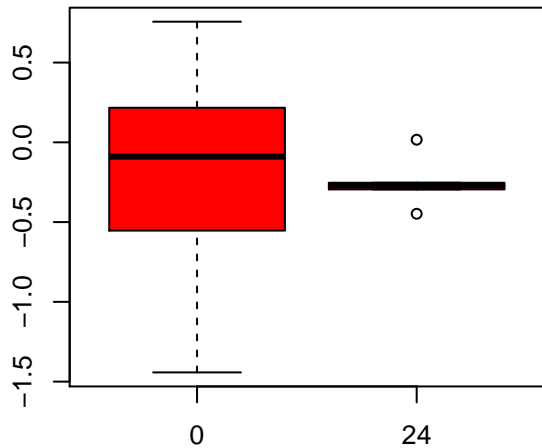

HCT116

**palmitoleate (16:1n7)**

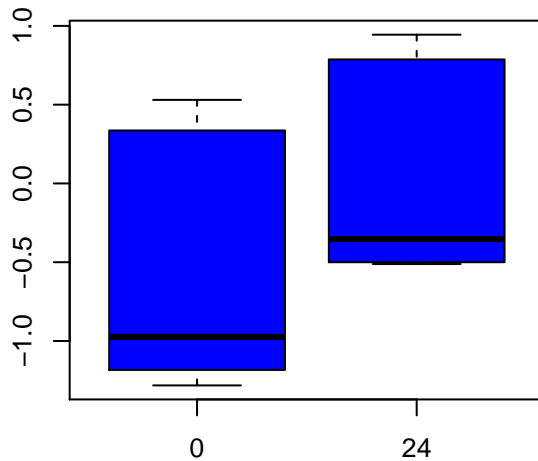

OVCAR

**palmitoleate (16:1n7)**

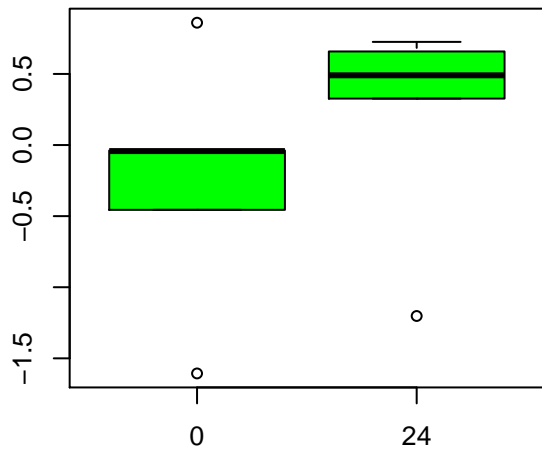

HCT15

**palmitoleate (16:1n7)**

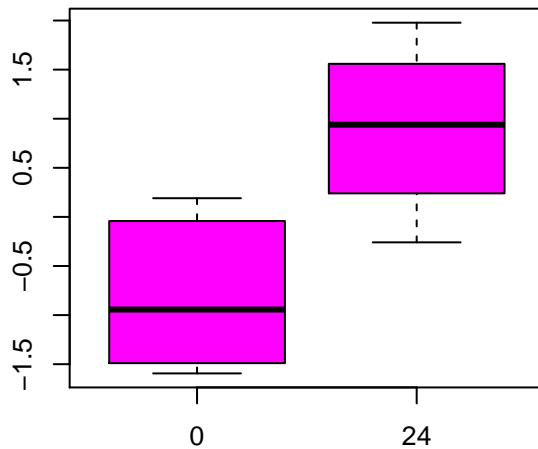

SKOV3

# palmitoleate (16:1n7)

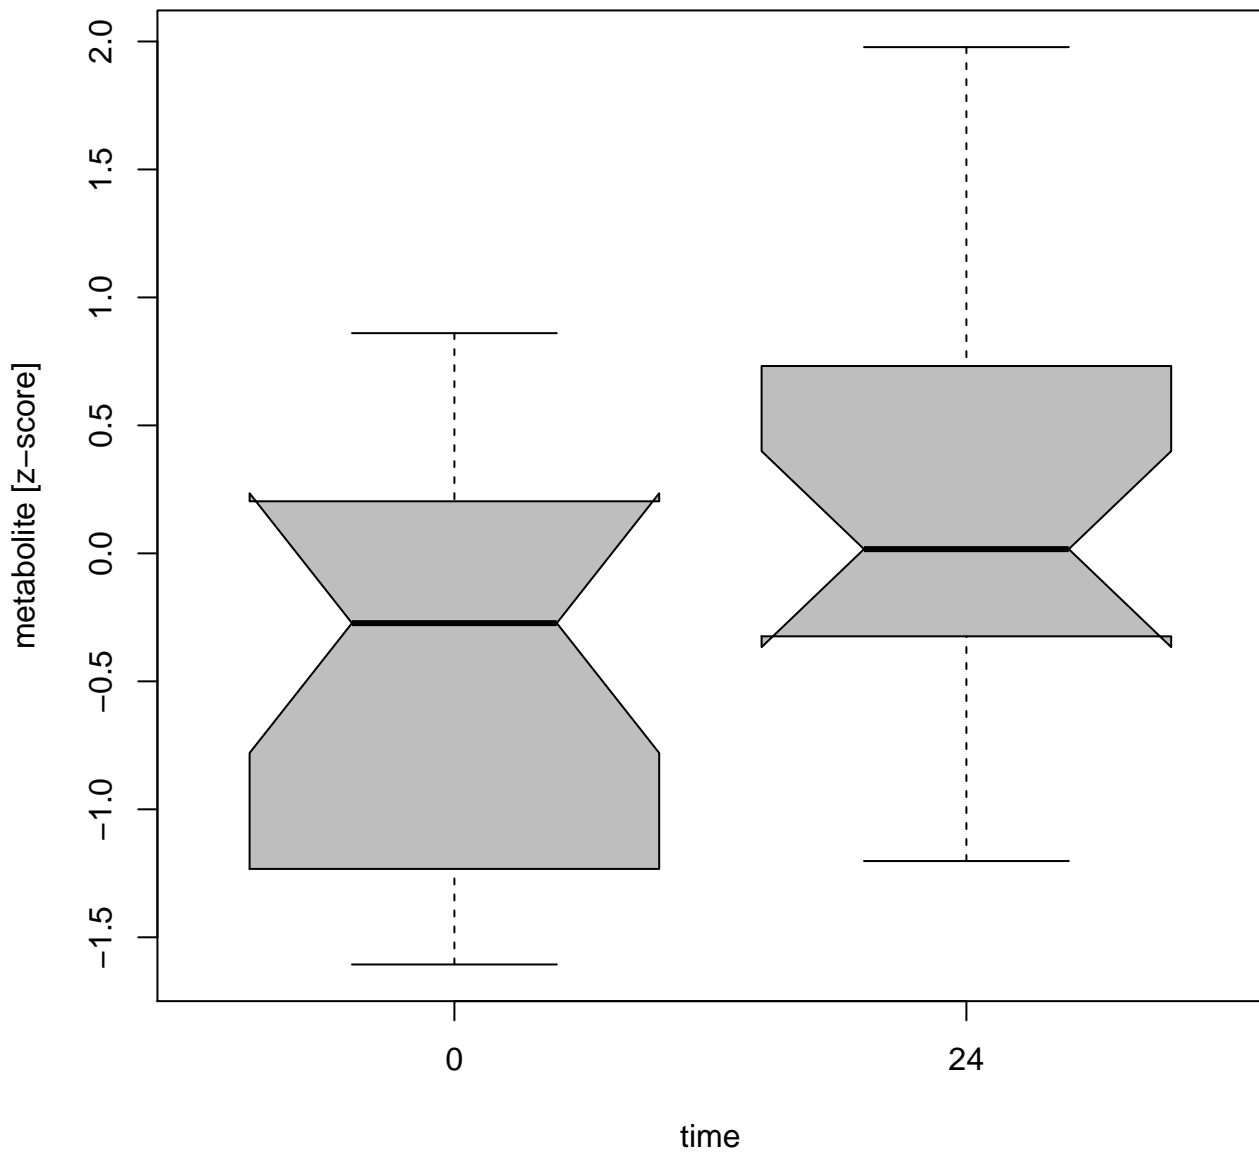

**palmitoyl sphingomyelin**

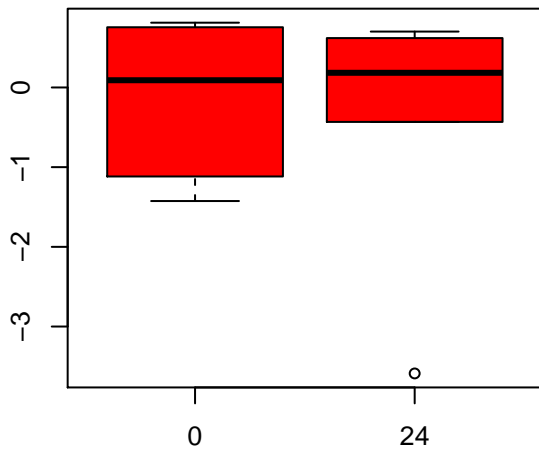

HCT116

**palmitoyl sphingomyelin**

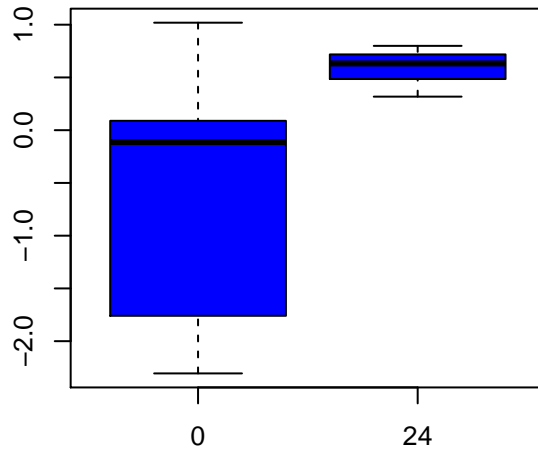

OVCAR

**palmitoyl sphingomyelin**

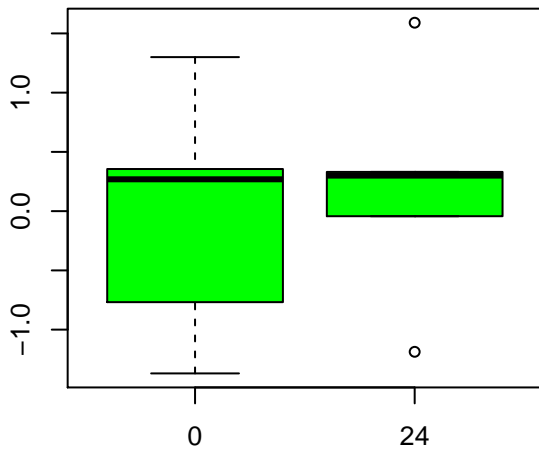

HCT15

**palmitoyl sphingomyelin**

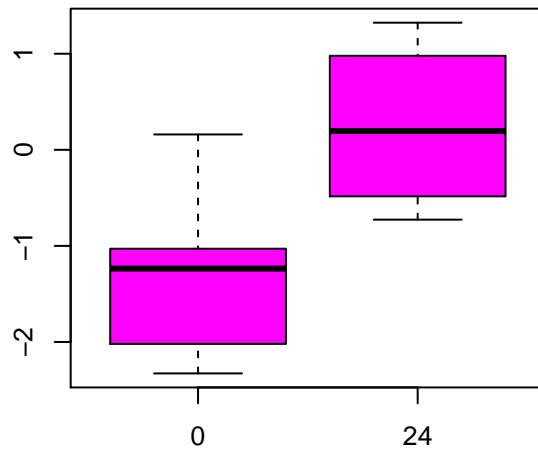

SKOV3



# palmitoyl sphingomyelin

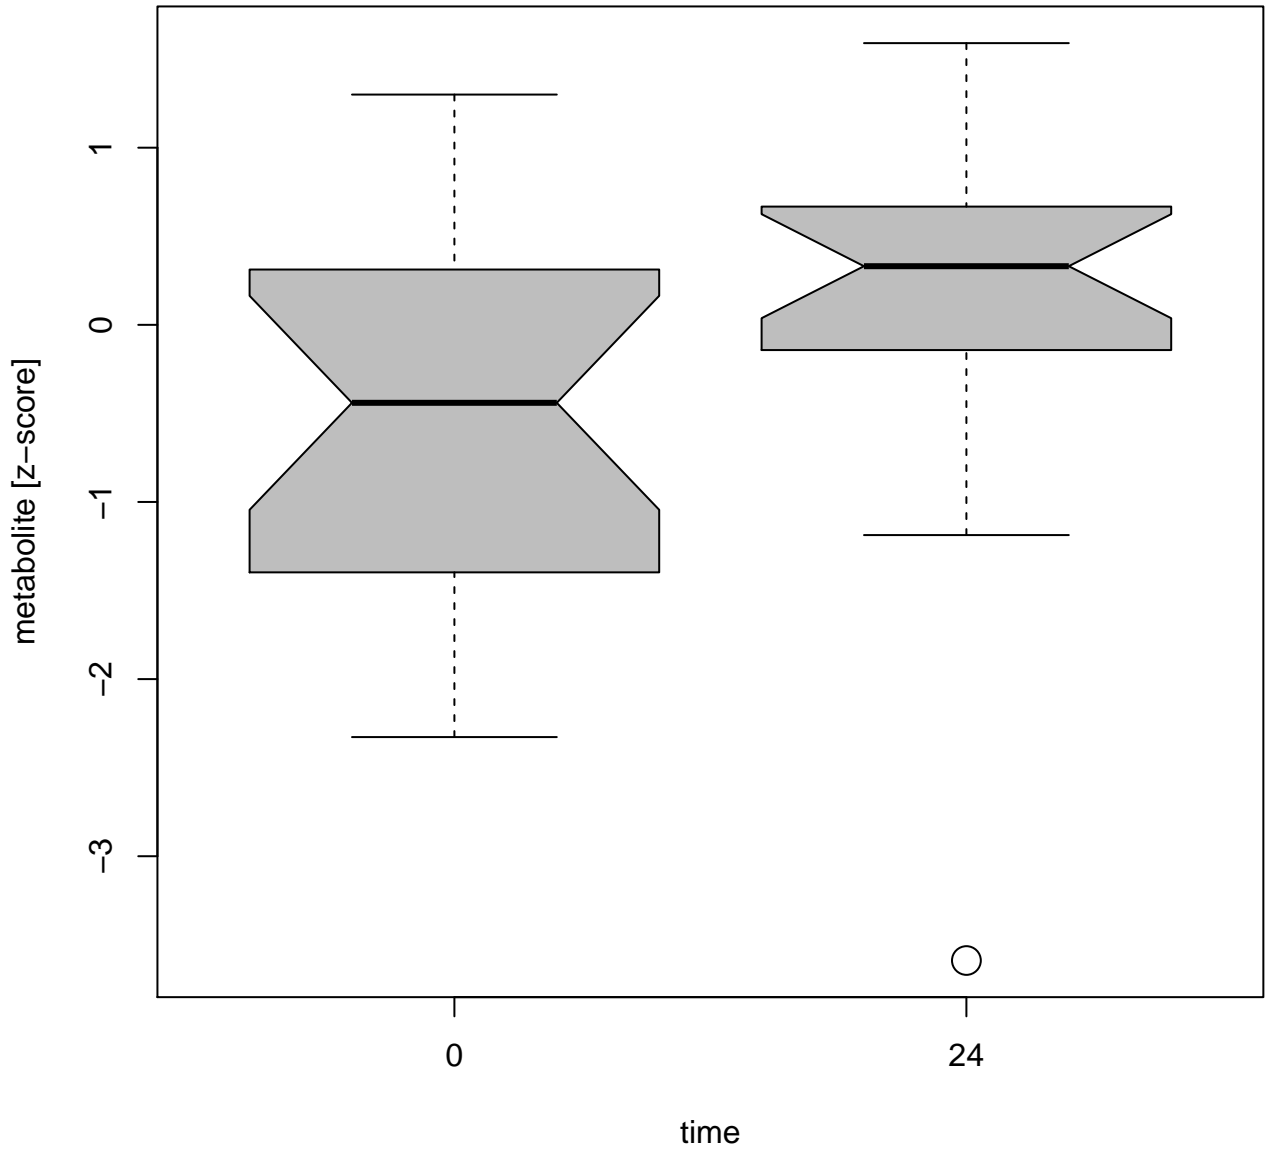

**pantothenate**

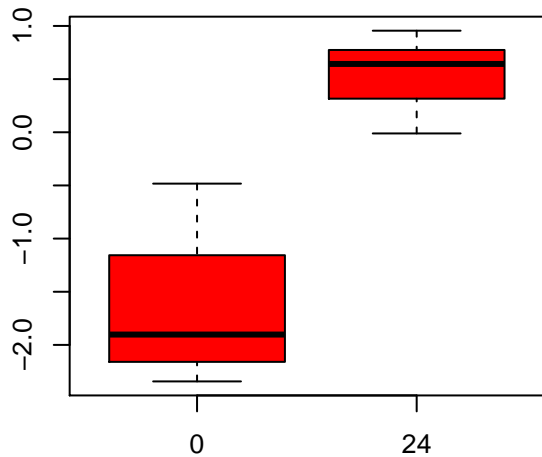

HCT116

**pantothenate**

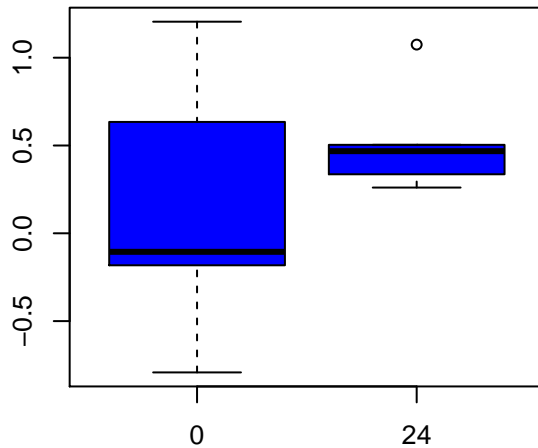

OVCAR

**pantothenate**

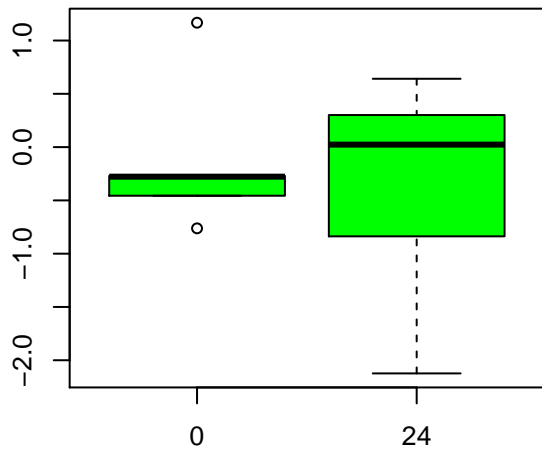

HCT15

**pantothenate**

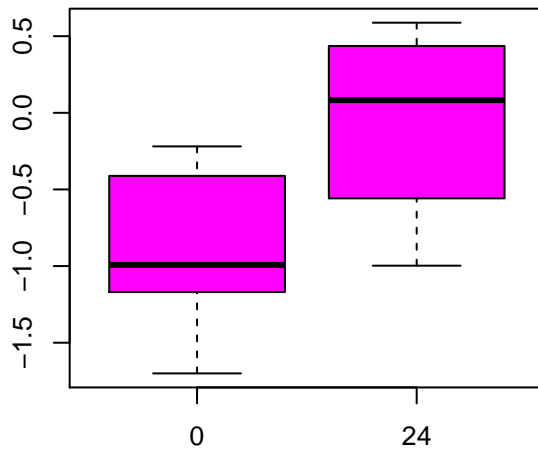

SKOV3

# pantothenate

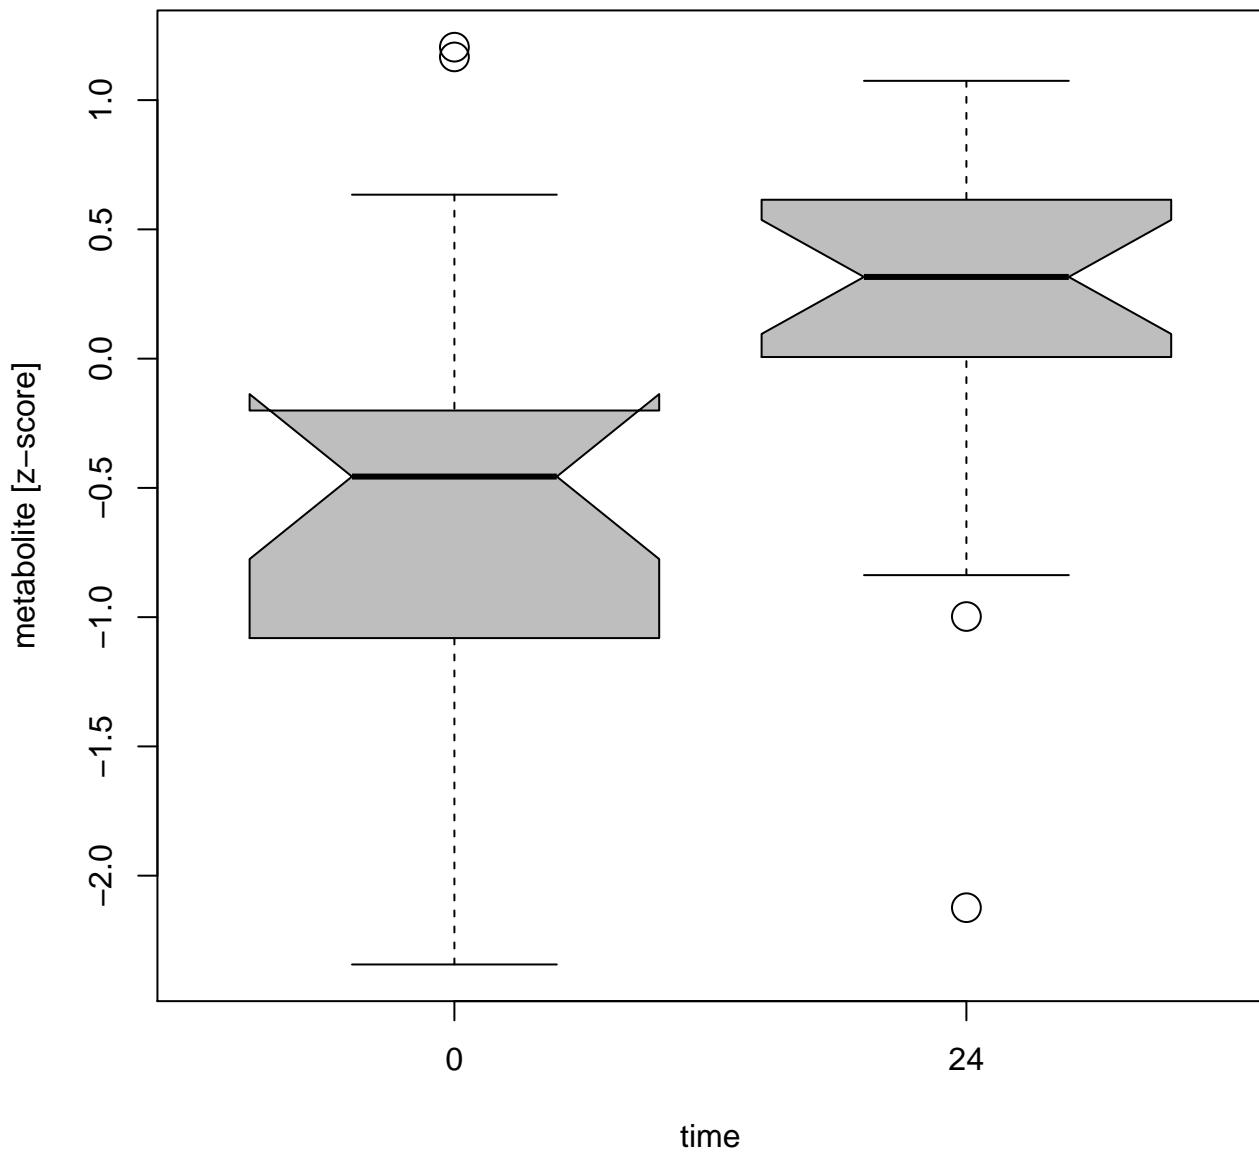

**phenylalanine**

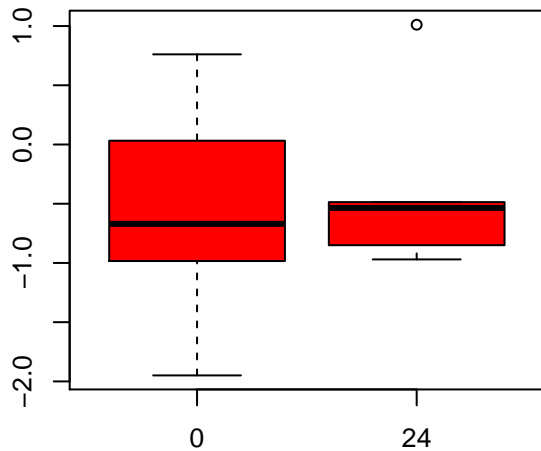

HCT116

**phenylalanine**

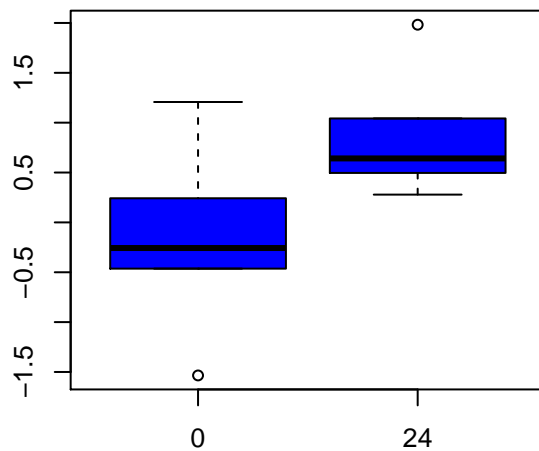

OVCAR

**phenylalanine**

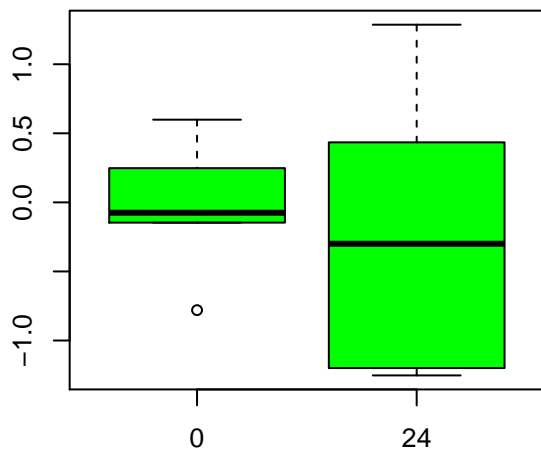

HCT15

**phenylalanine**

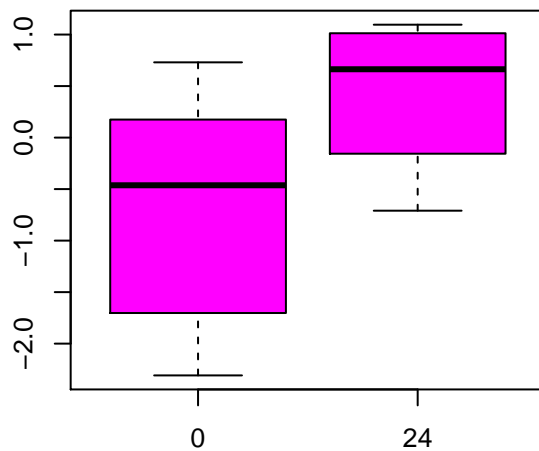

SKOV3

# phenylalanine

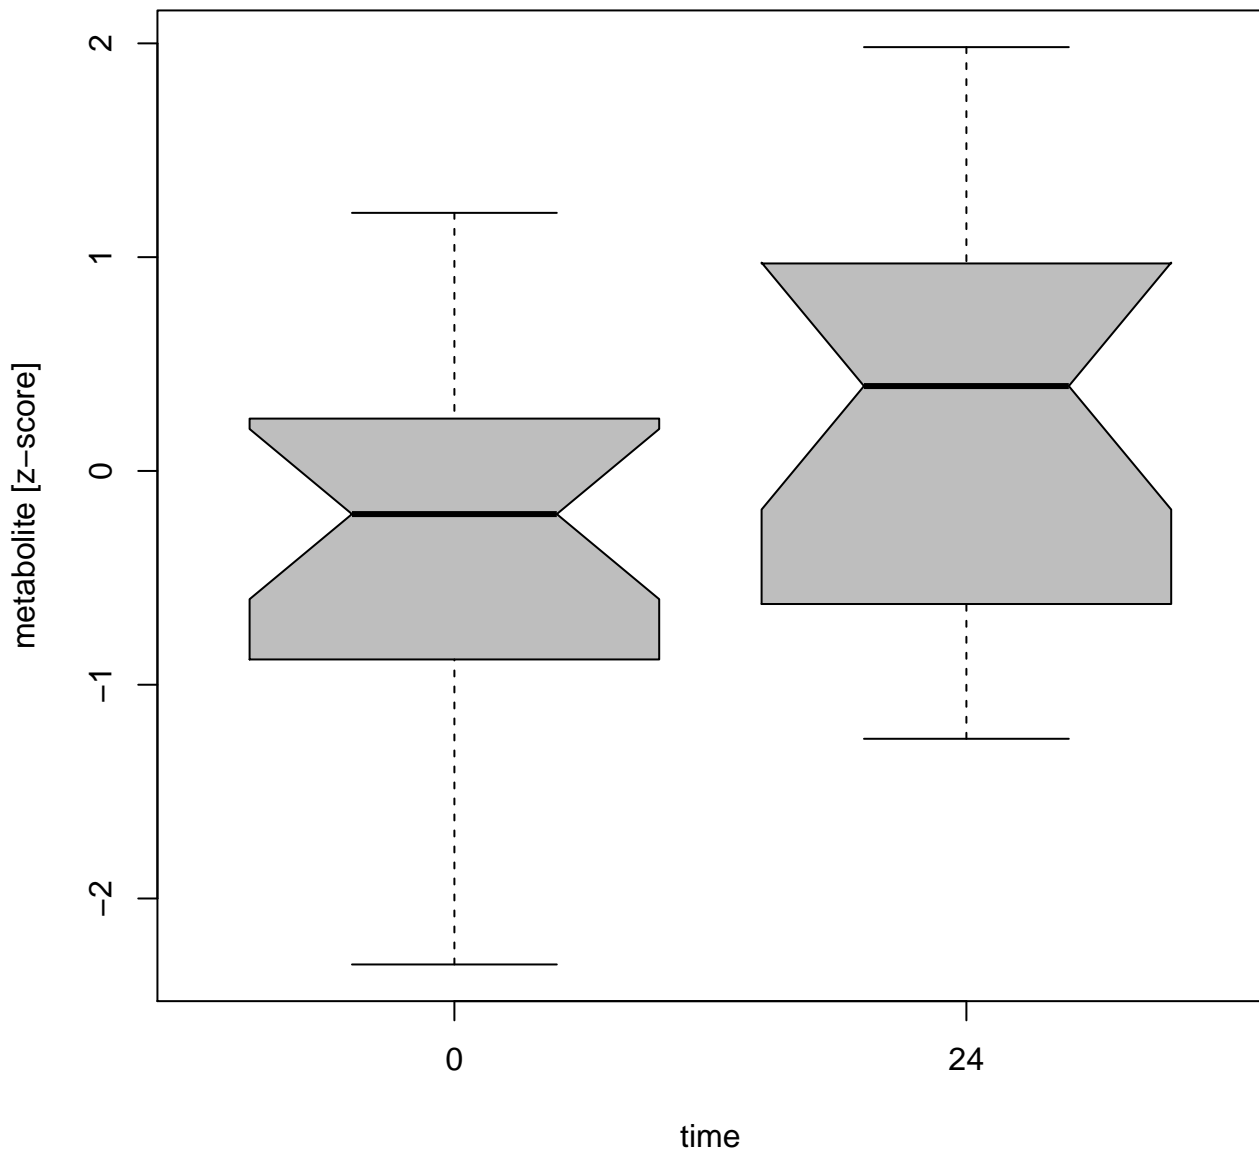

**phenylalanylglutamate**

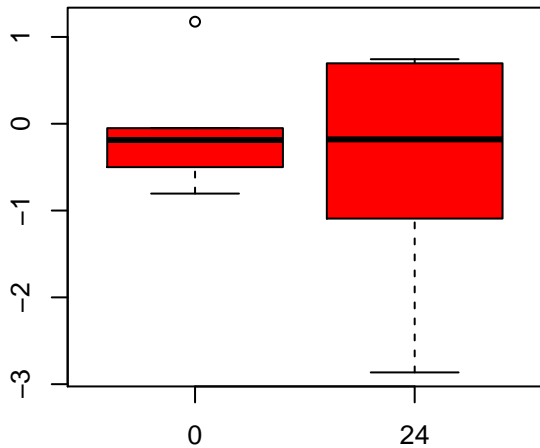

HCT116

**phenylalanylglutamate**

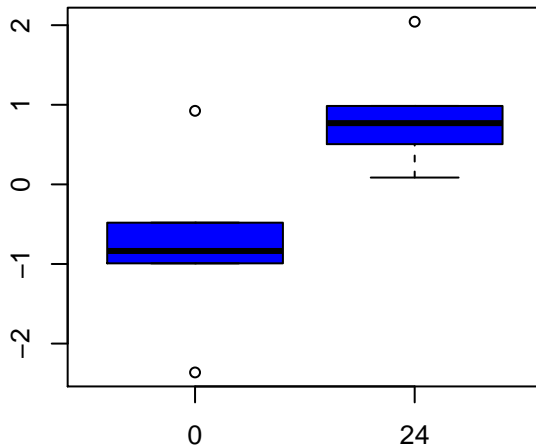

OVCAR

**phenylalanylglutamate**

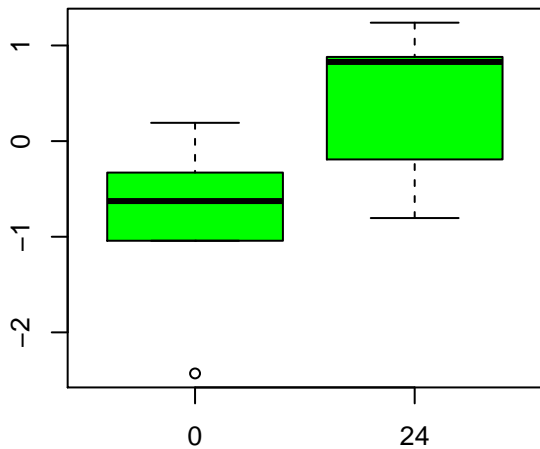

HCT15

**phenylalanylglutamate**

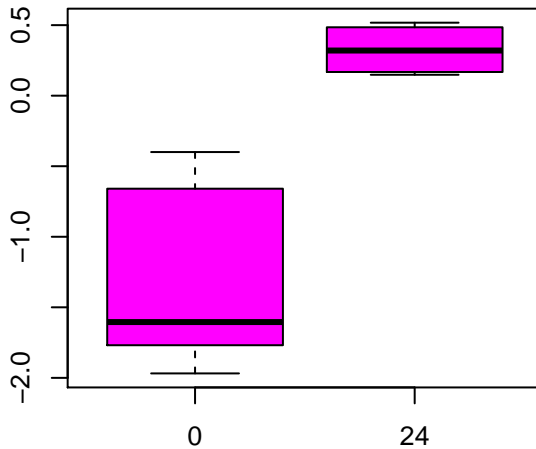

SKOV3

# phenylalanylglutamate

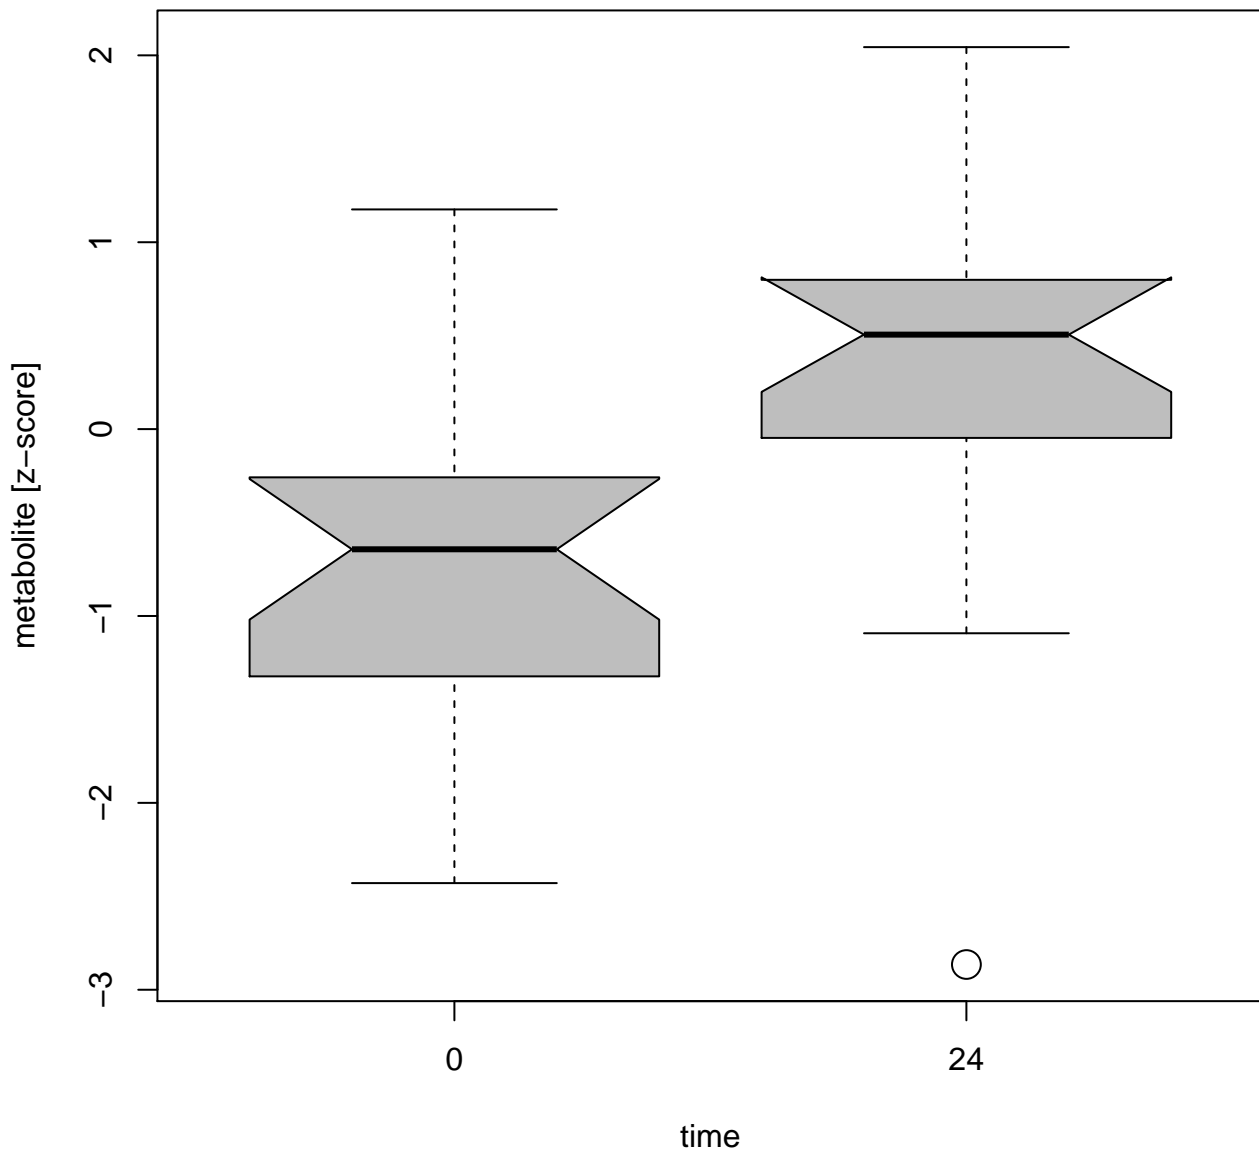

**phenylalanylglycine**

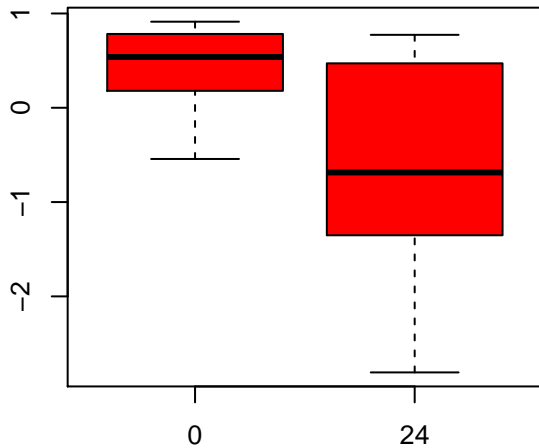

HCT116

**phenylalanylglycine**

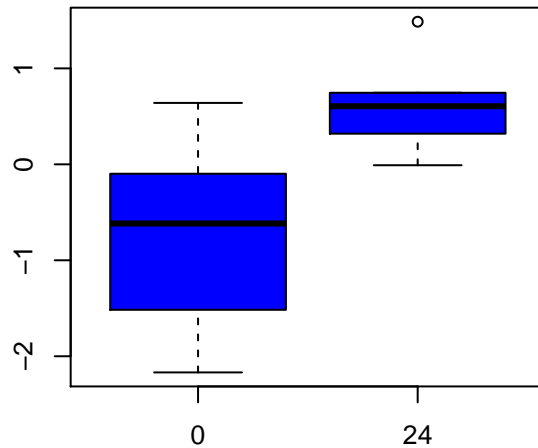

OVCAR

**phenylalanylglycine**

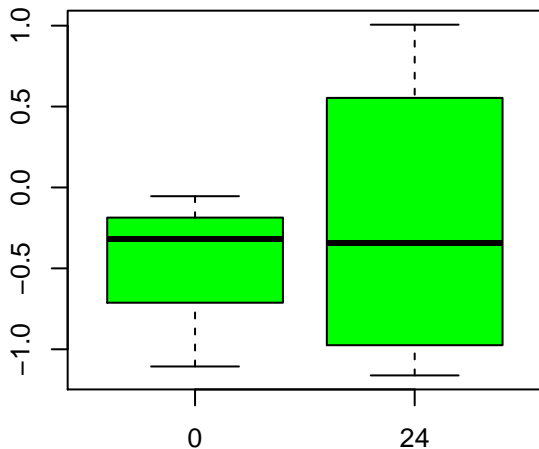

HCT15

**phenylalanylglycine**

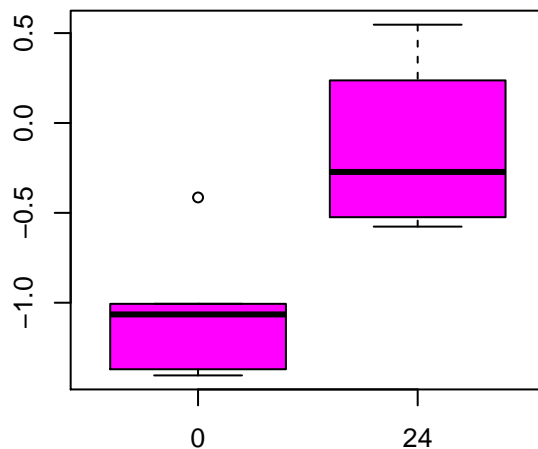

SKOV3



# phenylalanylglycine

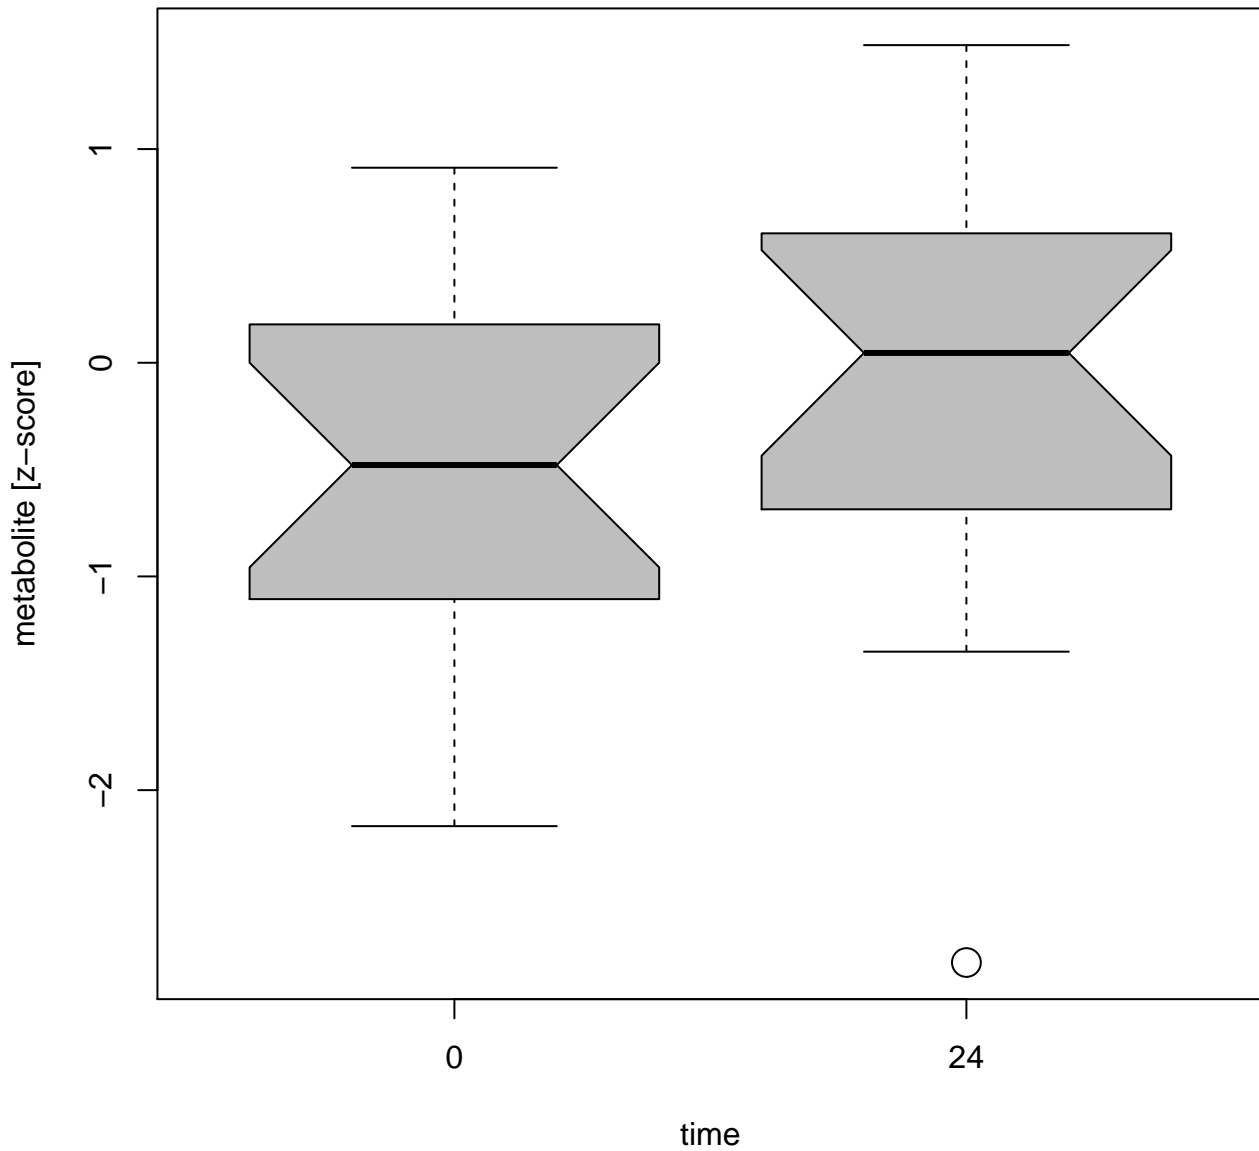

**phosphate**

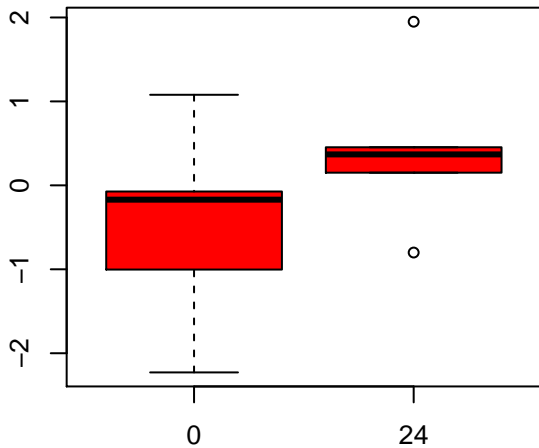

HCT116

**phosphate**

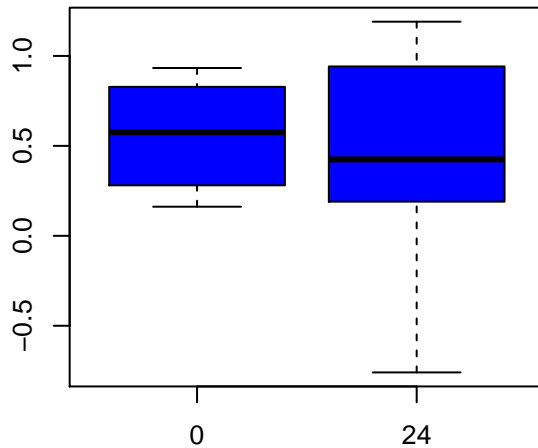

OVCAR

**phosphate**

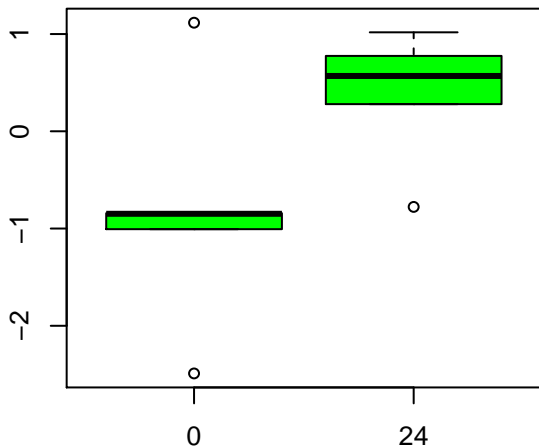

HCT15

**phosphate**

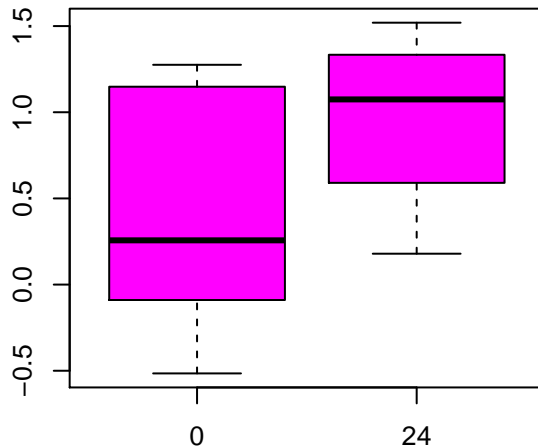

SKOV3

# phosphate

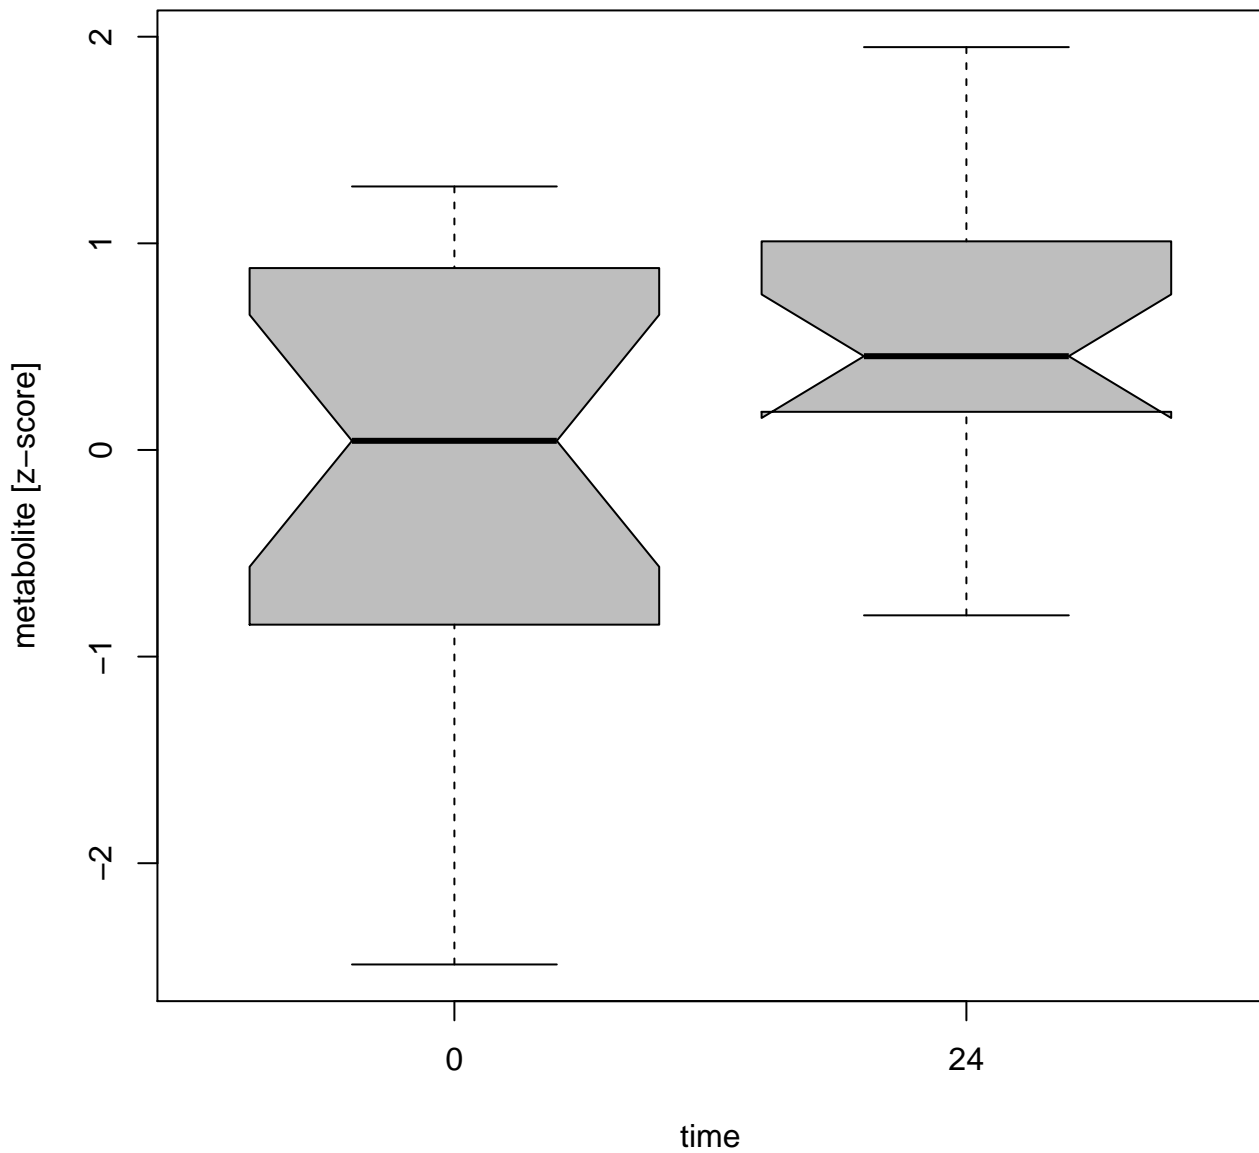

**pipecolate**

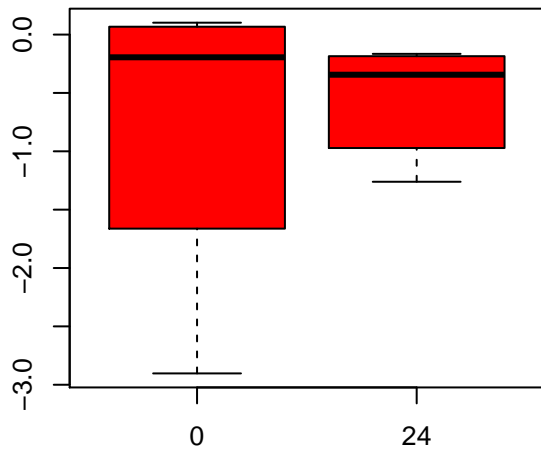

HCT116

**pipecolate**

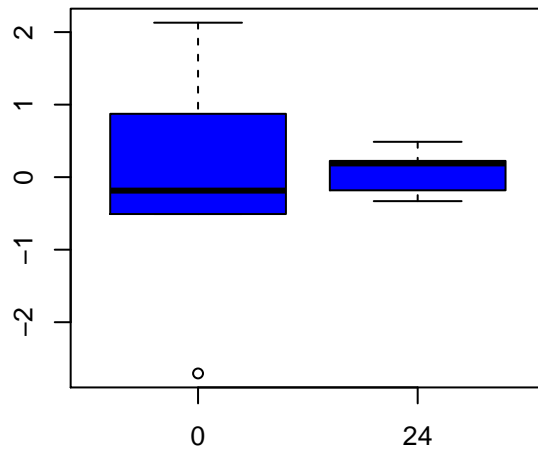

OVCAR

**pipecolate**

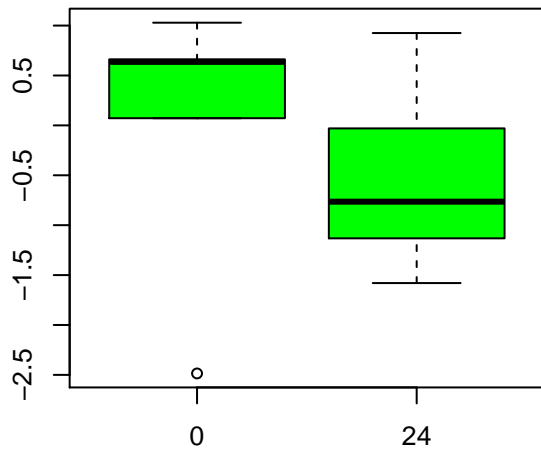

HCT15

**pipecolate**

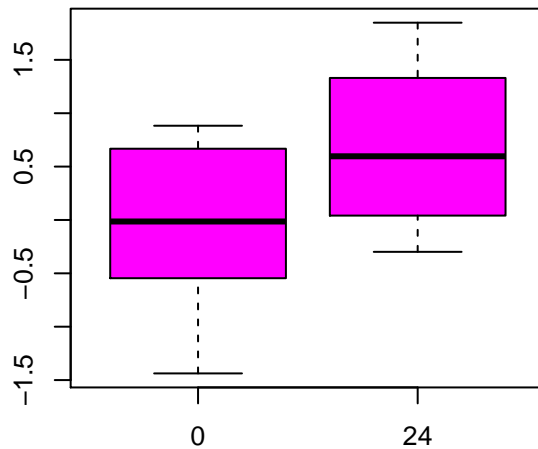

SKOV3

# pipecolate

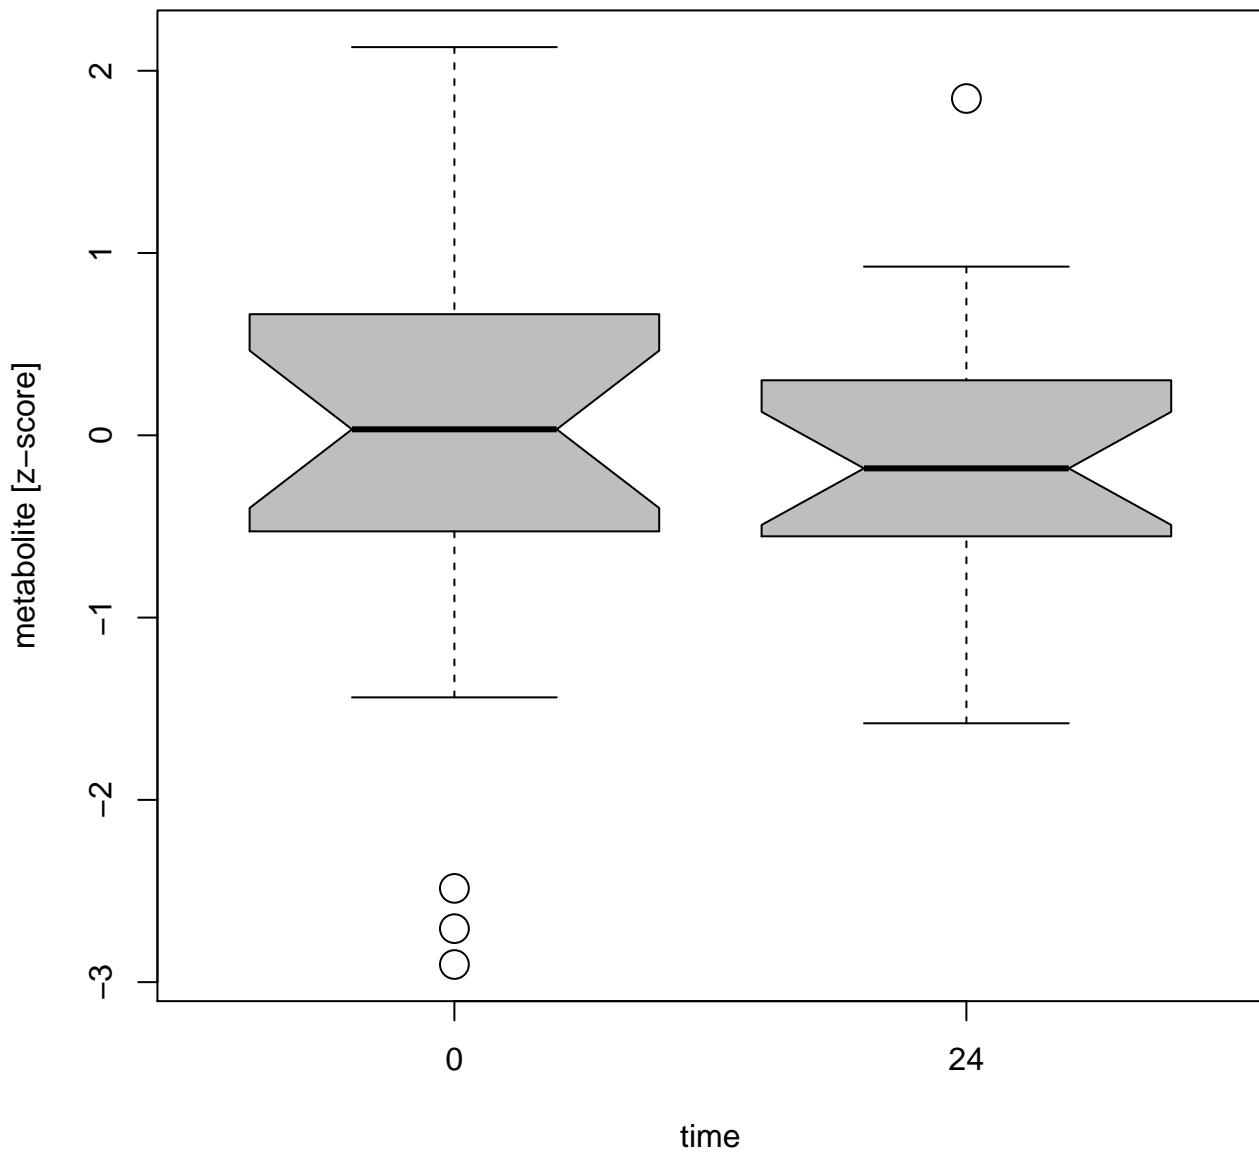

**pro-hydroxy-pro**

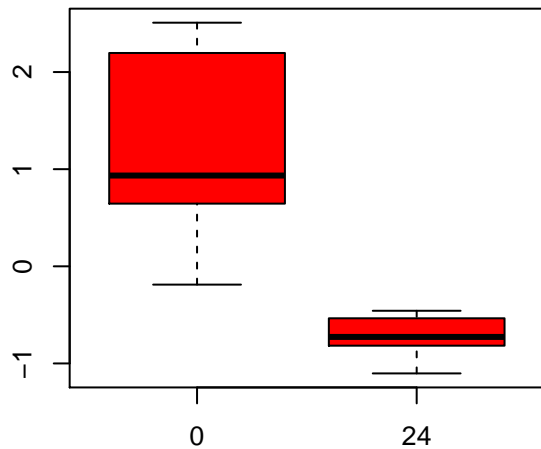

HCT116

**pro-hydroxy-pro**

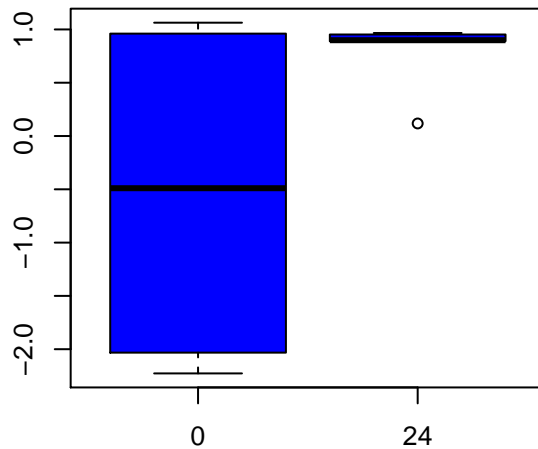

OVCAR

**pro-hydroxy-pro**

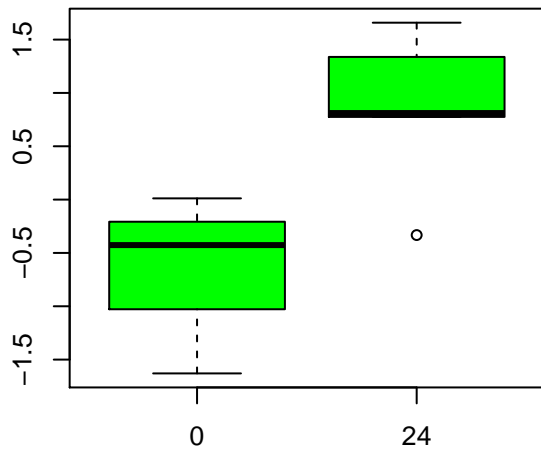

HCT15

**pro-hydroxy-pro**

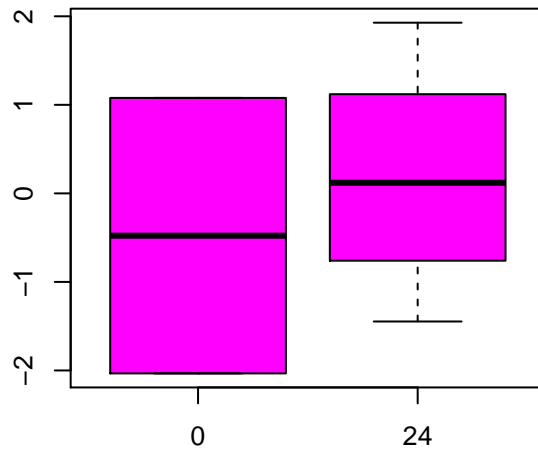

SKOV3

# pro-hydroxy-pro

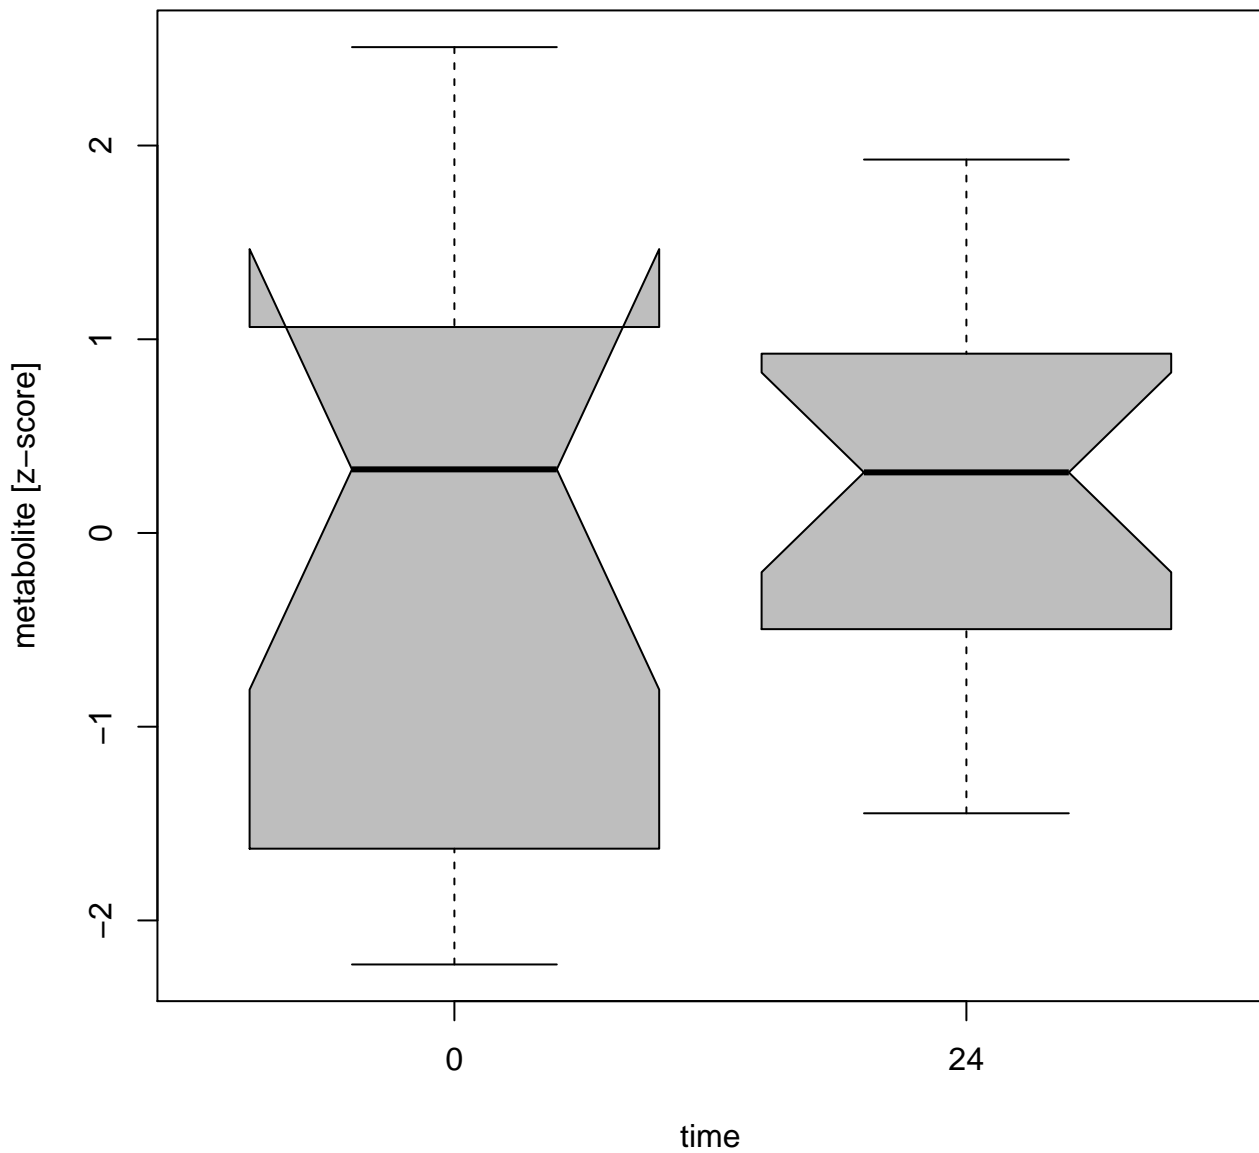

**proline**

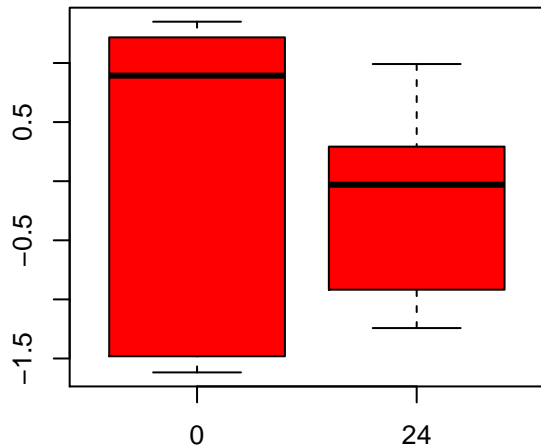

**proline**

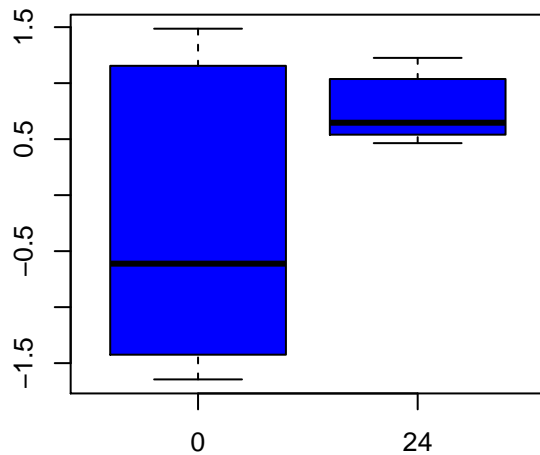

HCT116

OVCAR

**proline**

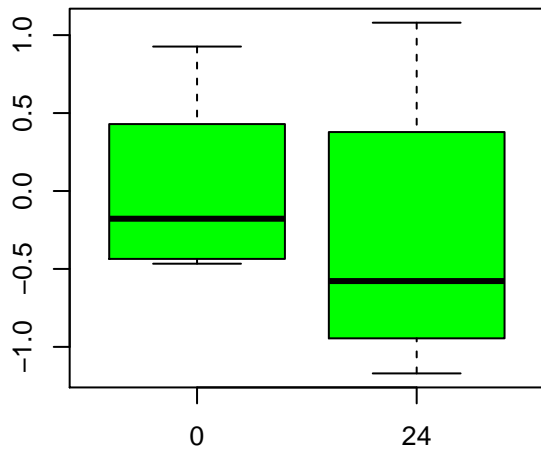

**proline**

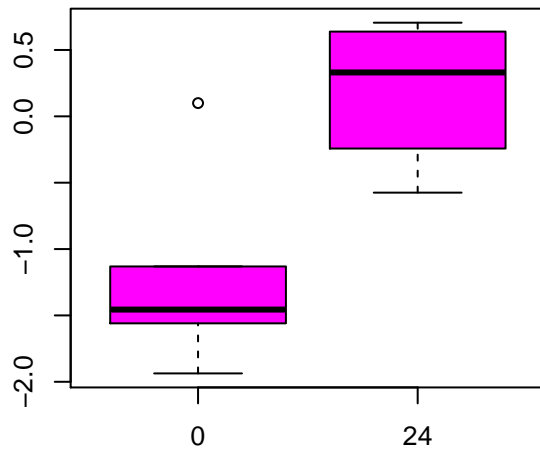

HCT15

SKOV3



# proline

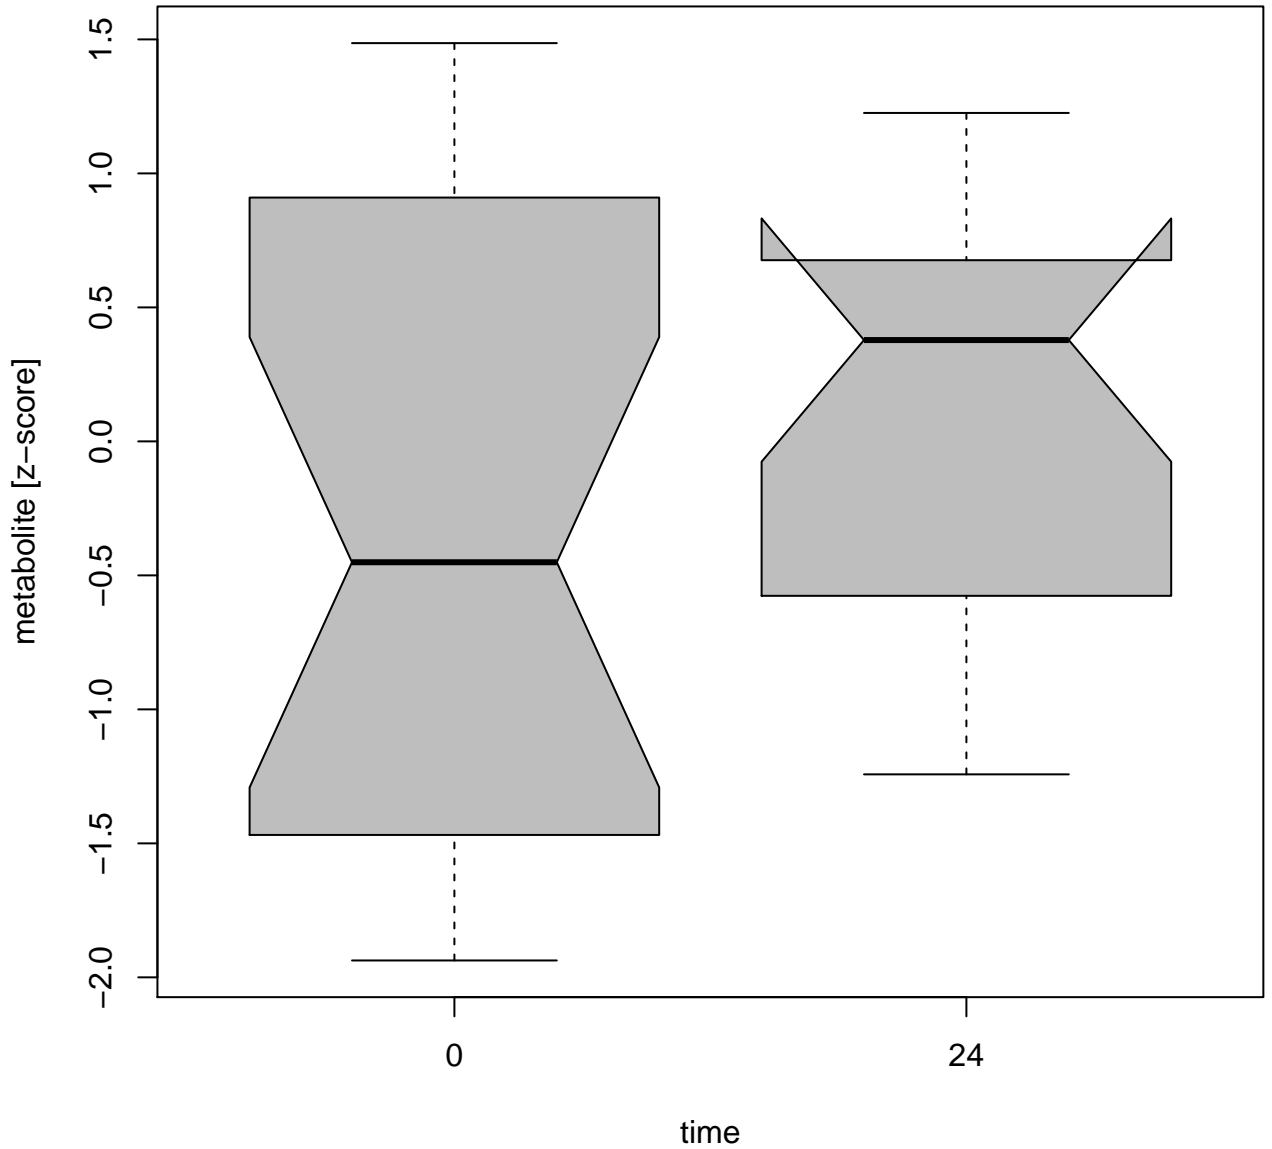

**polyglutamate**

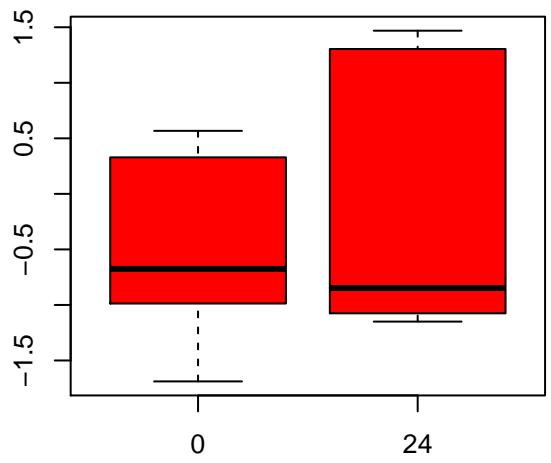

HCT116

**polyglutamate**

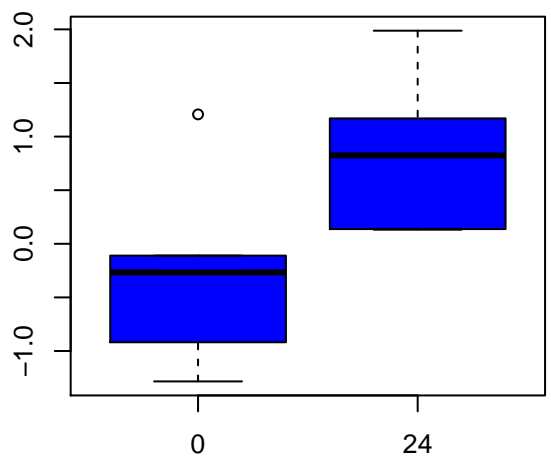

OVCAR

**polyglutamate**

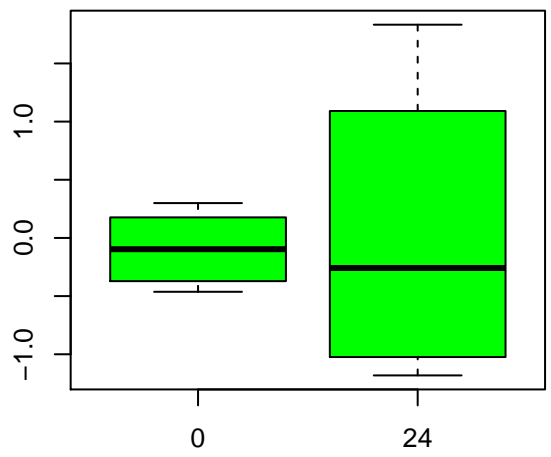

HCT15

**polyglutamate**

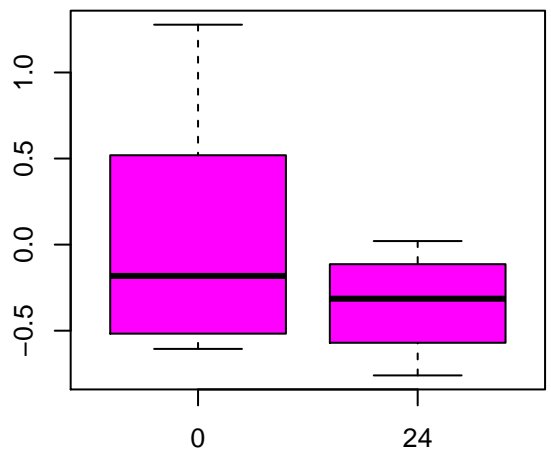

SKOV3

# prolylglutamate

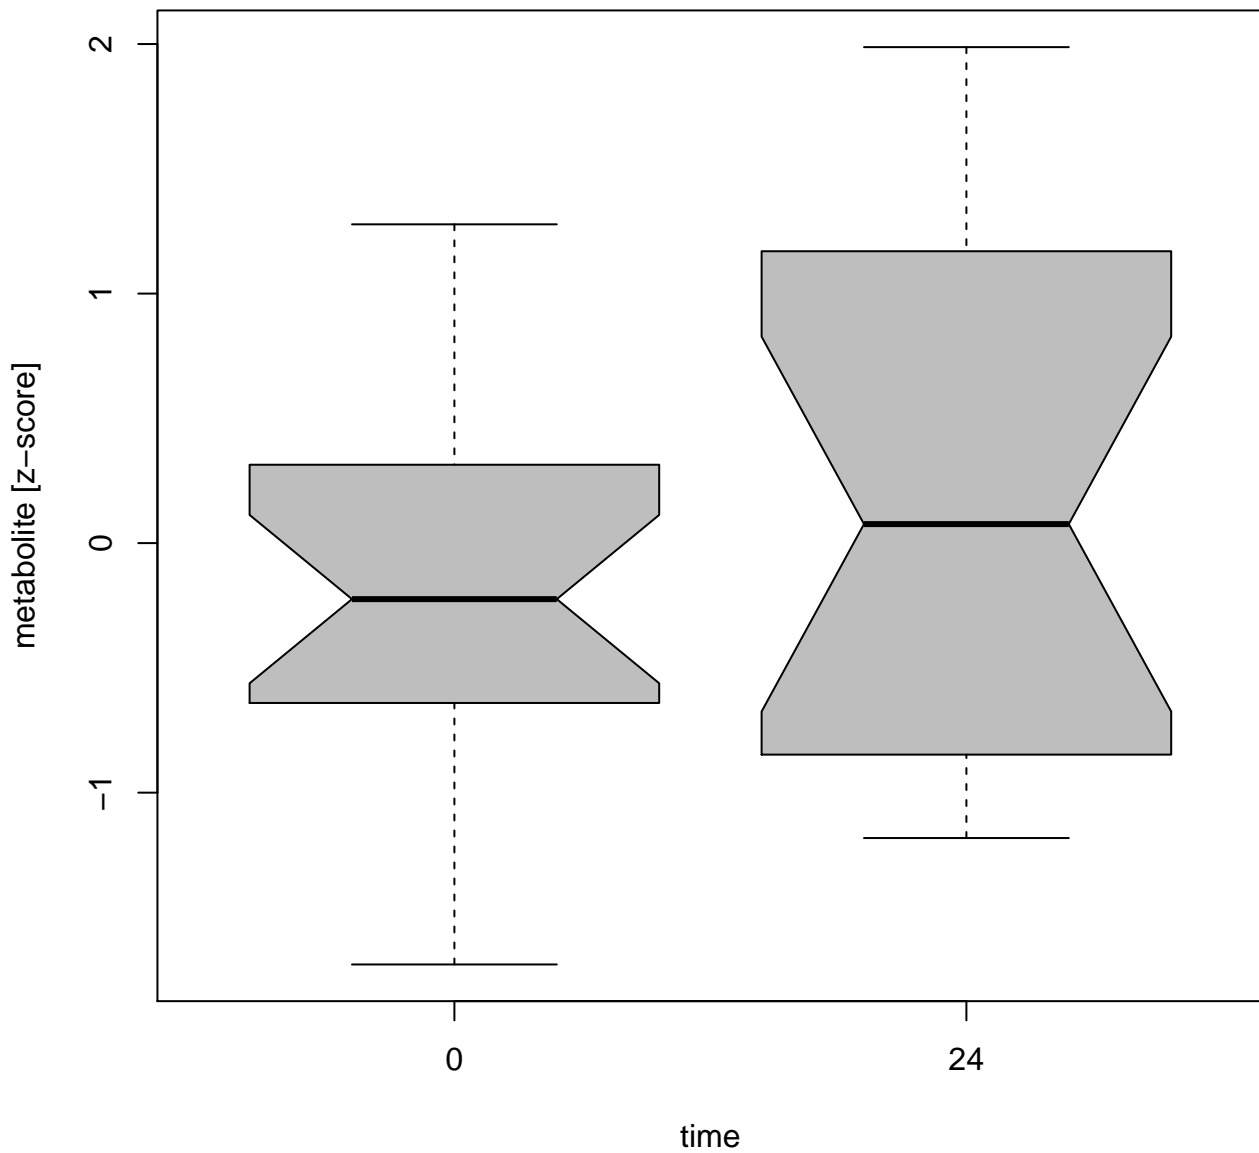

**propionylcarnitine**

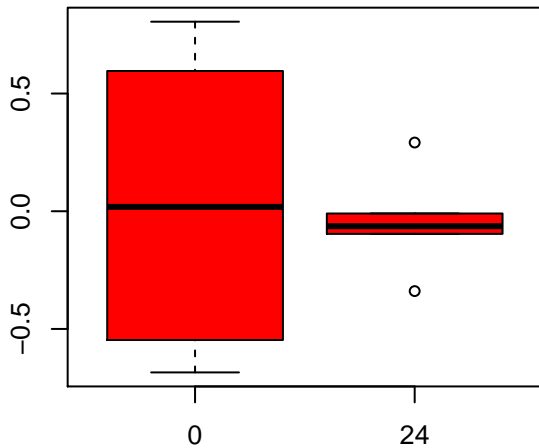

HCT116

**propionylcarnitine**

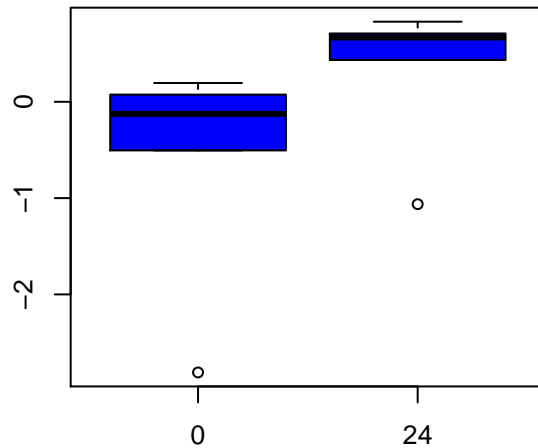

OVCAR

**propionylcarnitine**

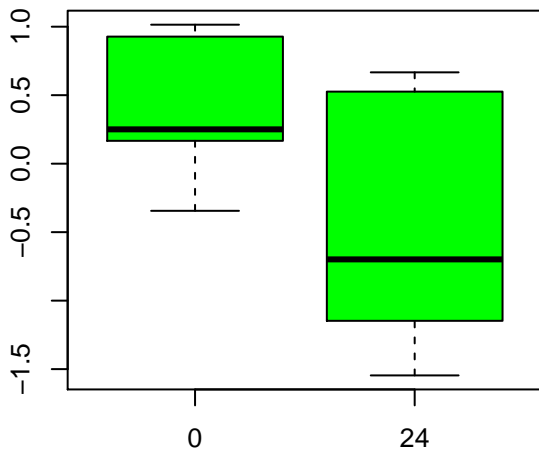

HCT15

**propionylcarnitine**

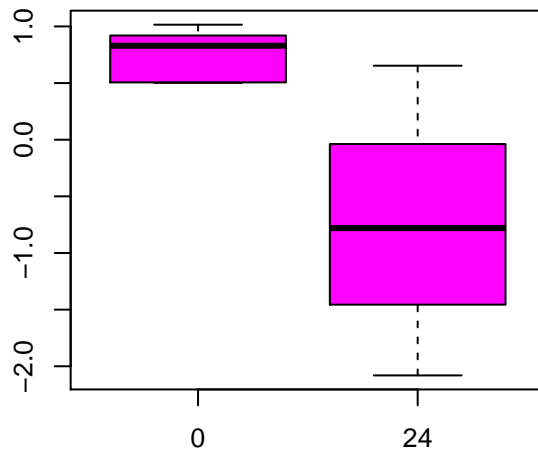

SKOV3

# propionylcarnitine

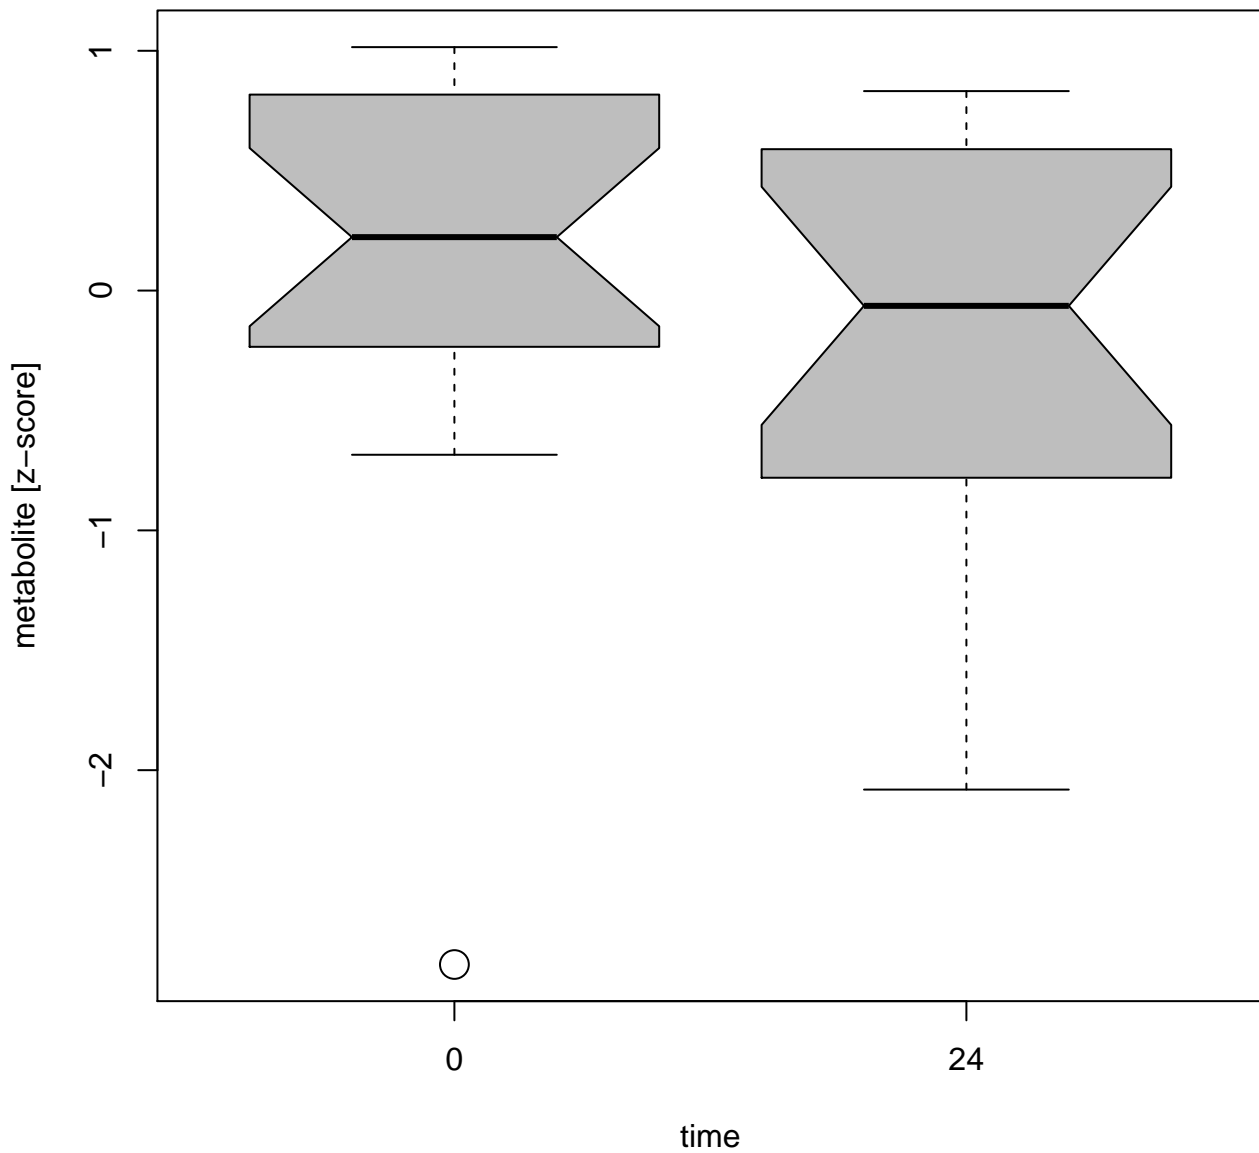

**putrescine**

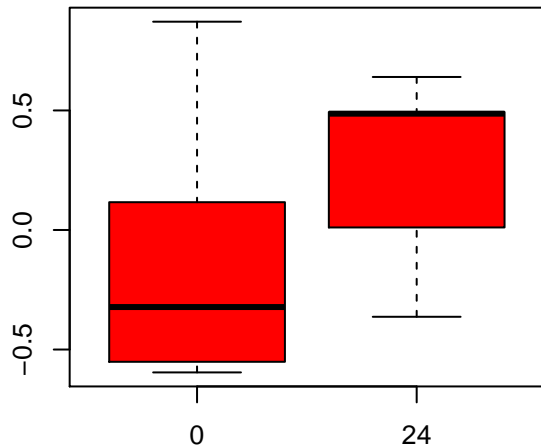

HCT116

**putrescine**

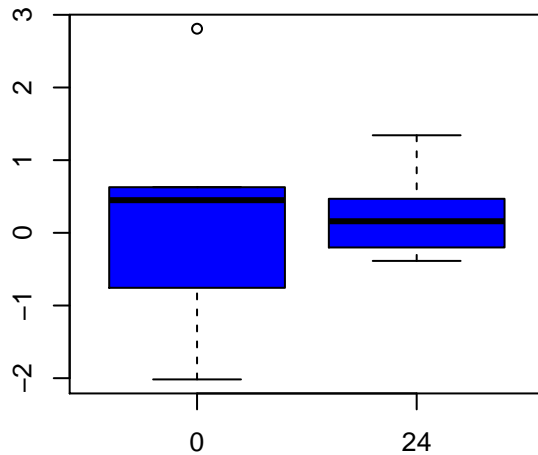

OVCAR

**putrescine**

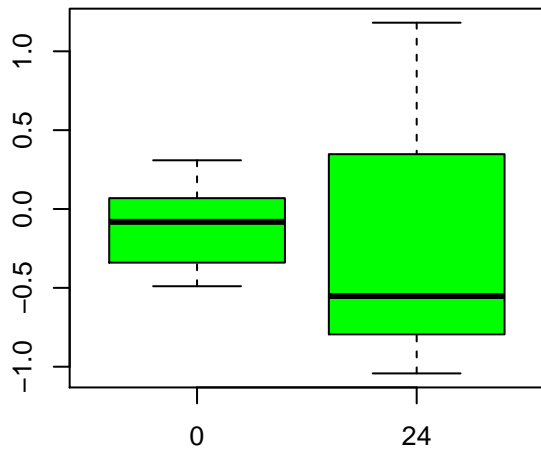

HCT15

**putrescine**

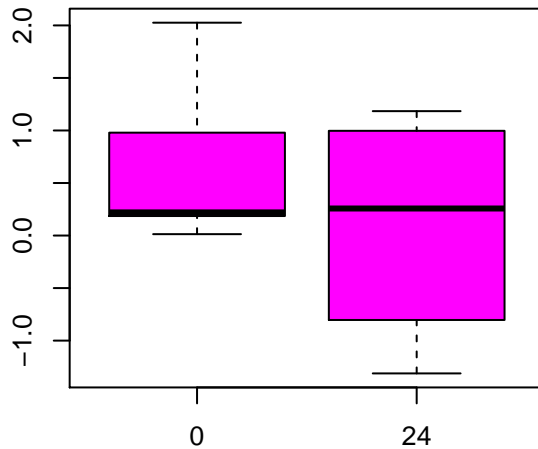

SKOV3

# putrescine

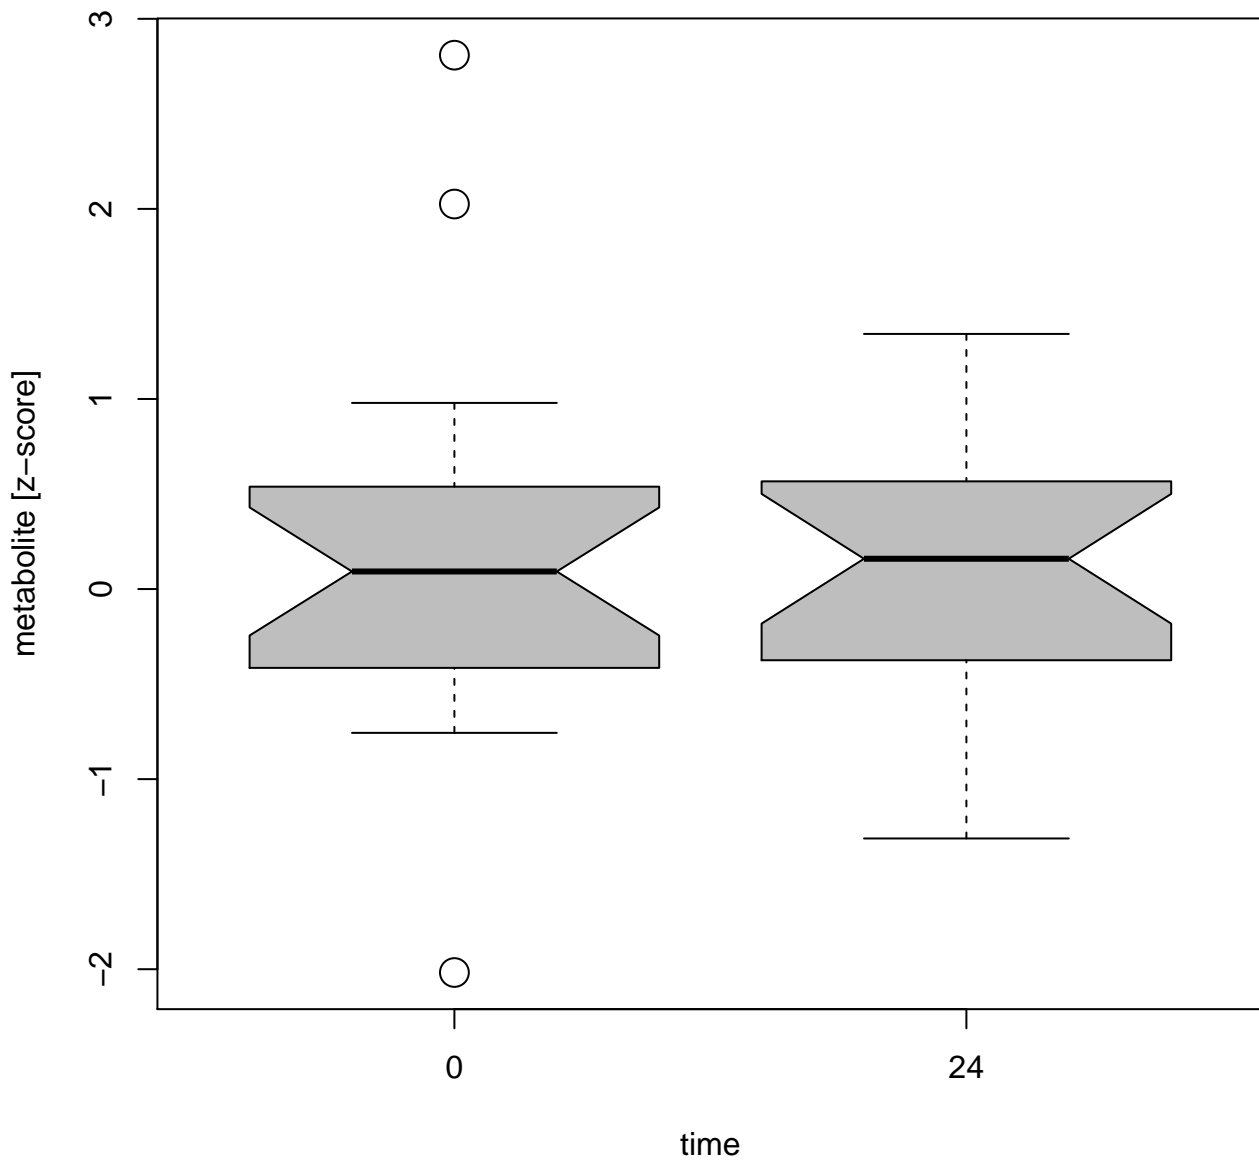

**pyroglutamine\***

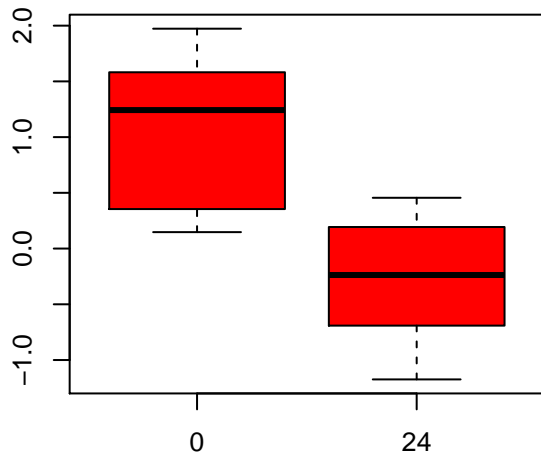

HCT116

**pyroglutamine\***

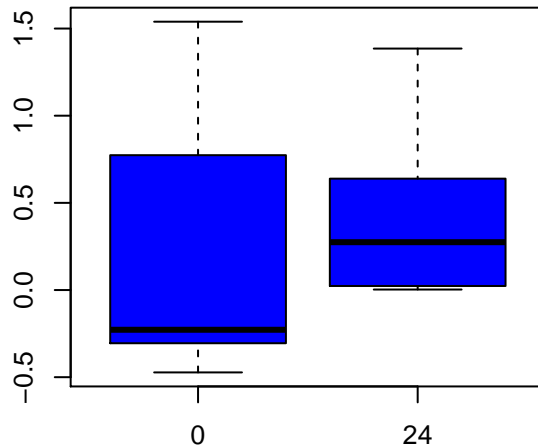

OVCAR

**pyroglutamine\***

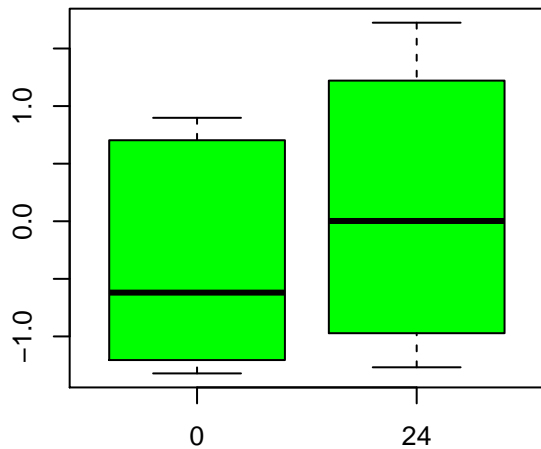

HCT15

**pyroglutamine\***

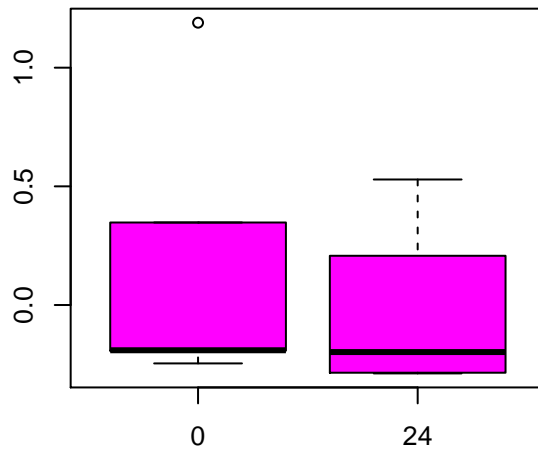

SKOV3



# pyroglutamine\*

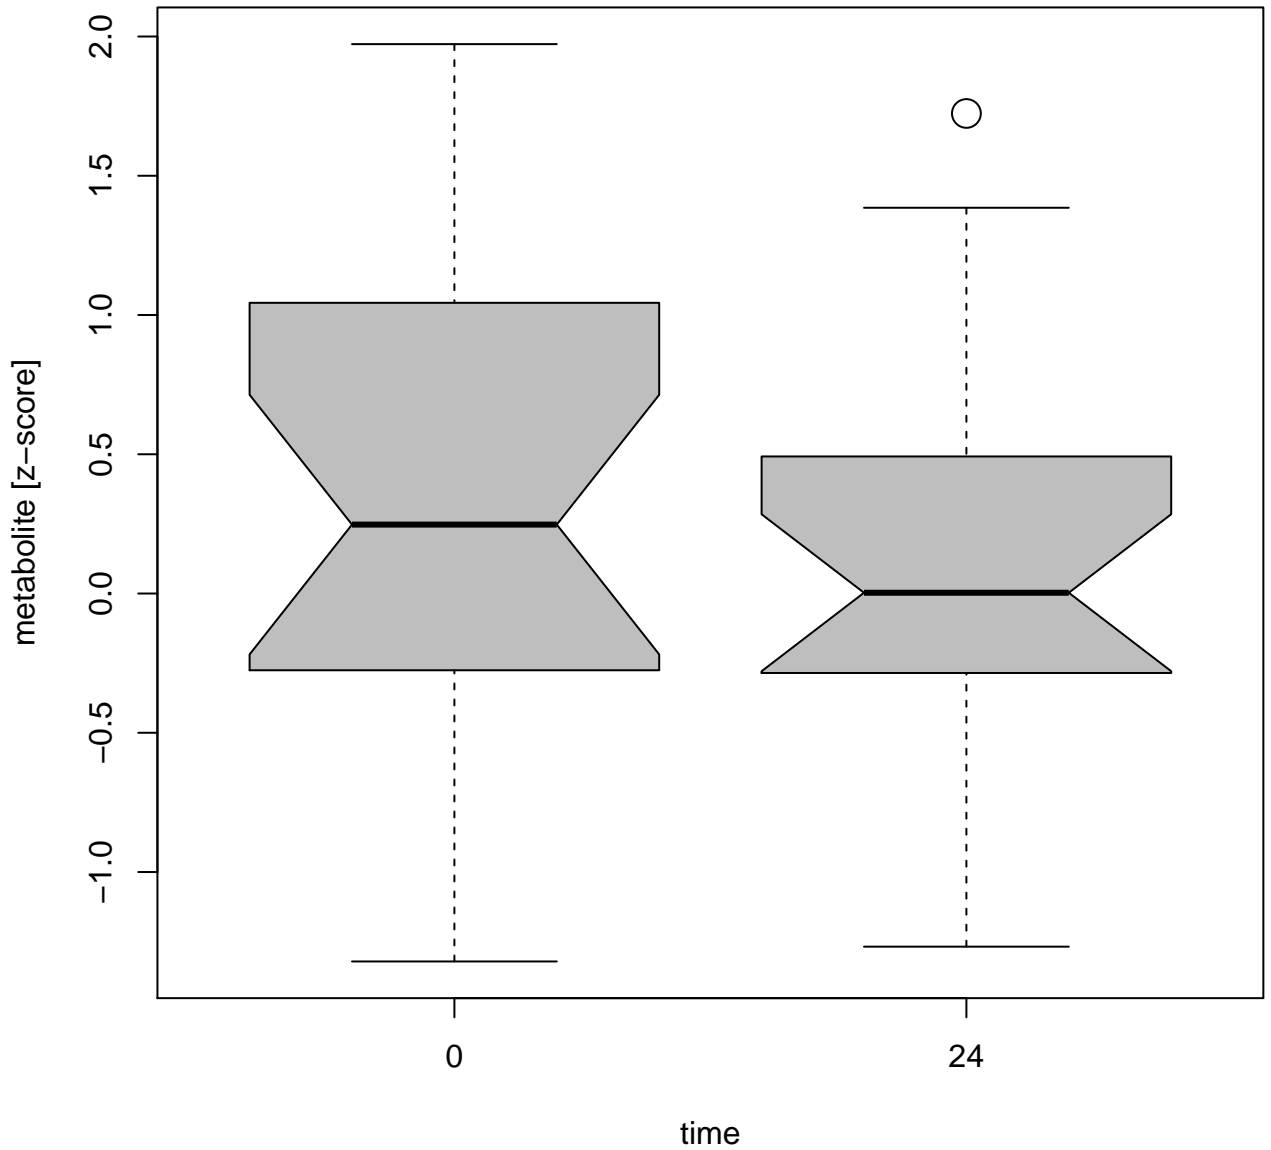

**serine**

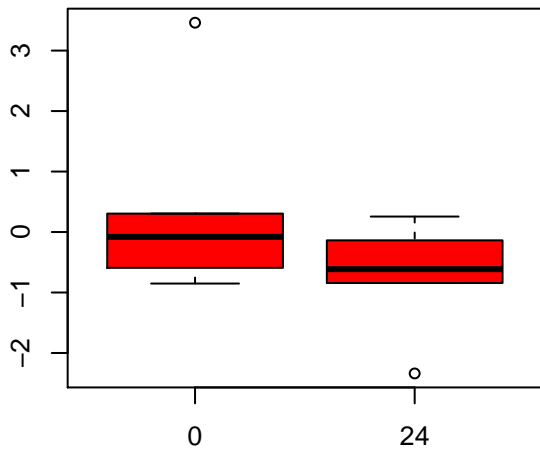

**serine**

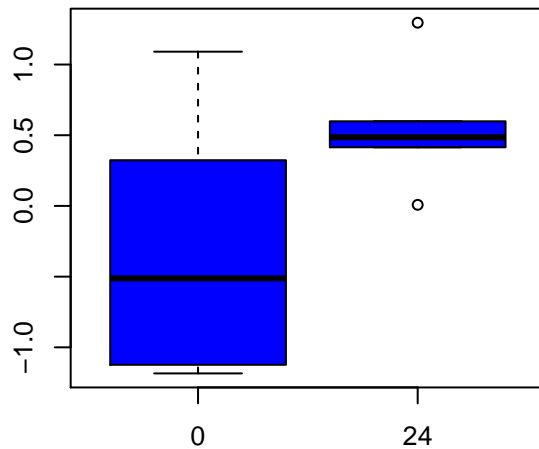

HCT116

OVCAR

**serine**

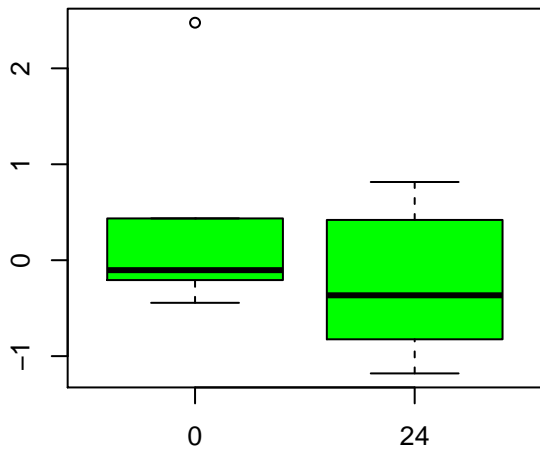

**serine**

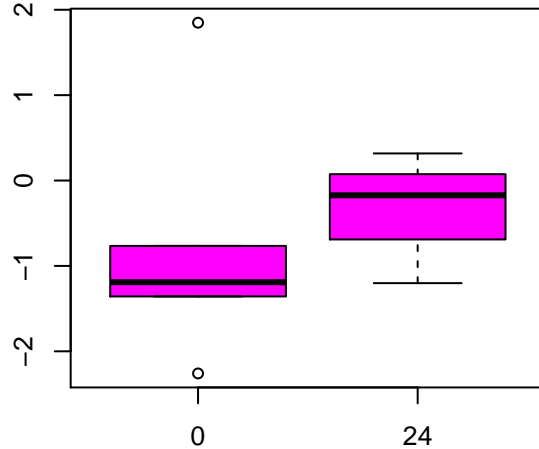

HCT15

SKOV3

# serine

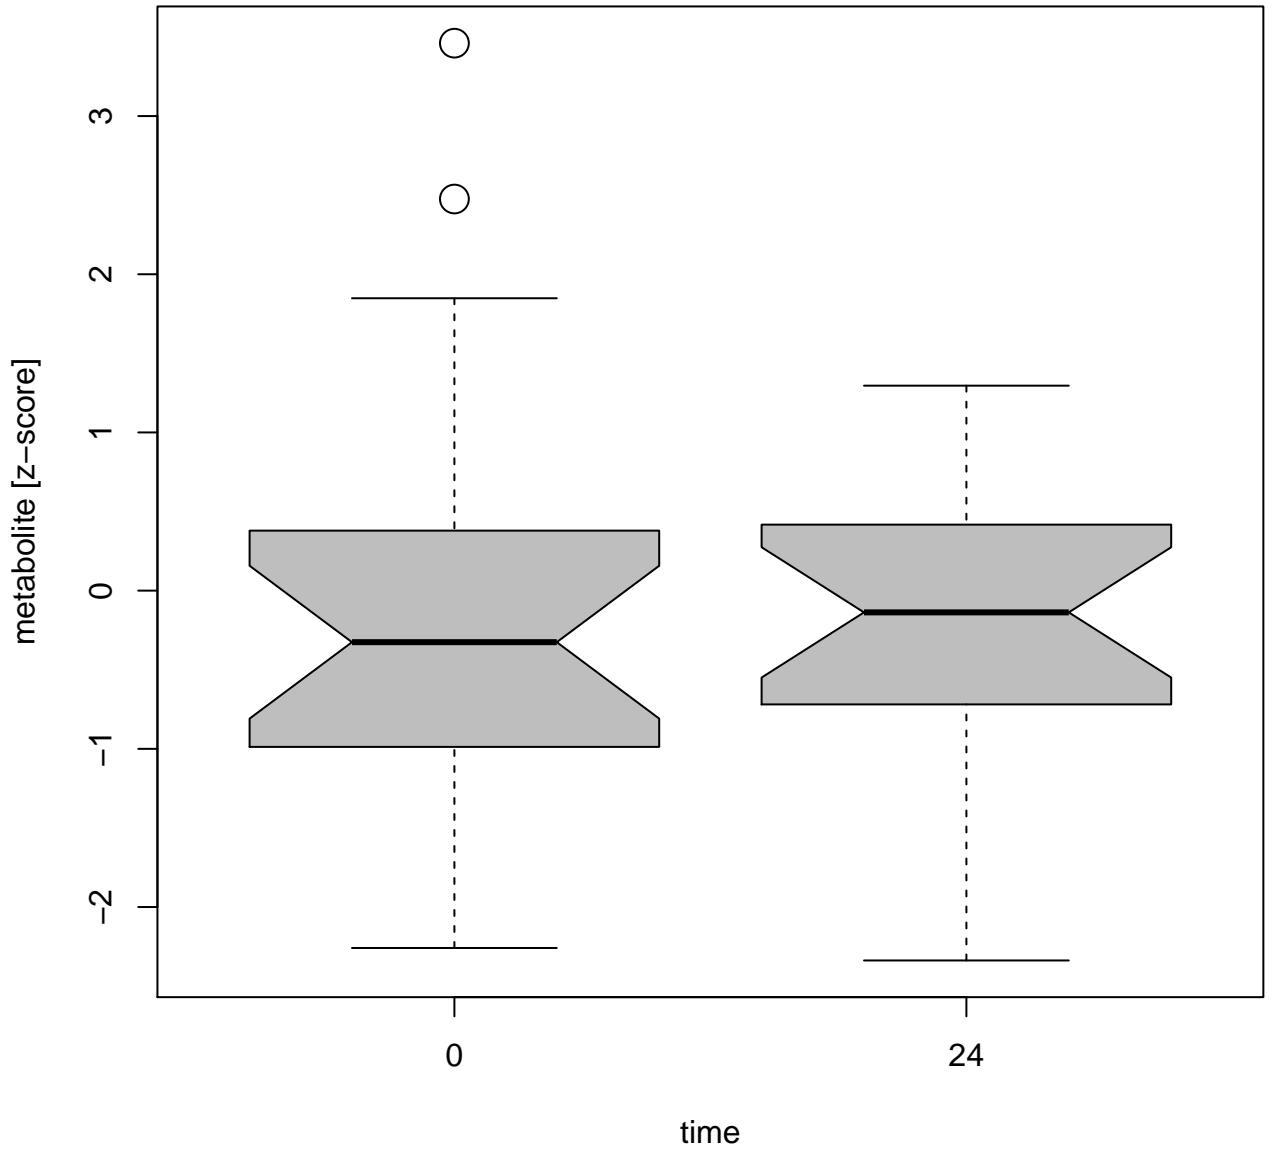

**serylleucine**

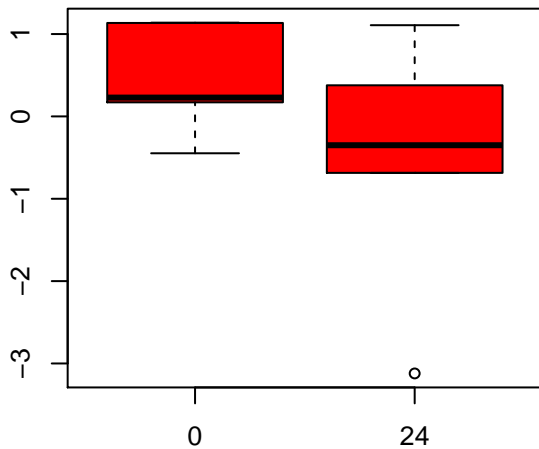

HCT116

**serylleucine**

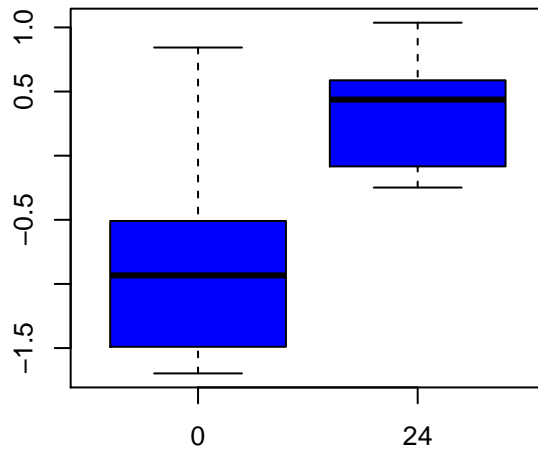

OVCAR

**serylleucine**

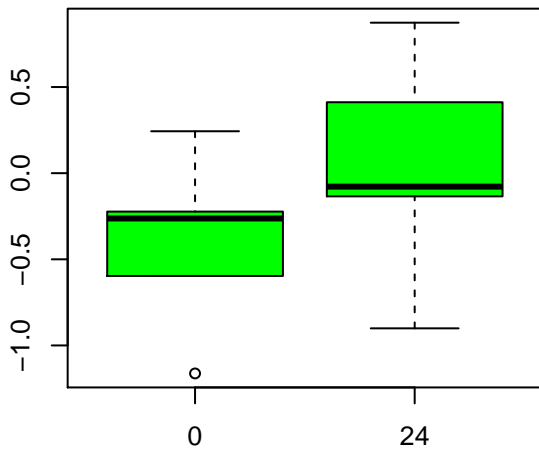

HCT15

**serylleucine**

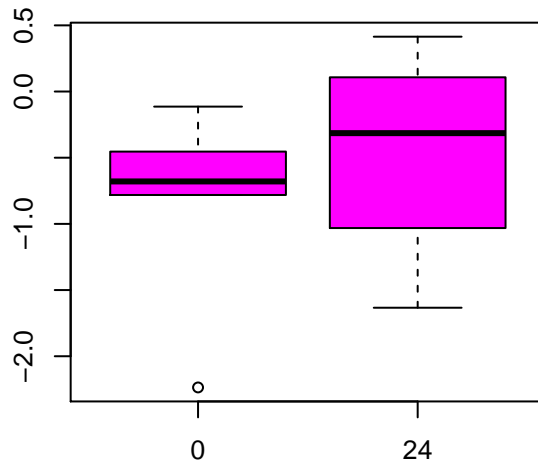

SKOV3

# serylleucine

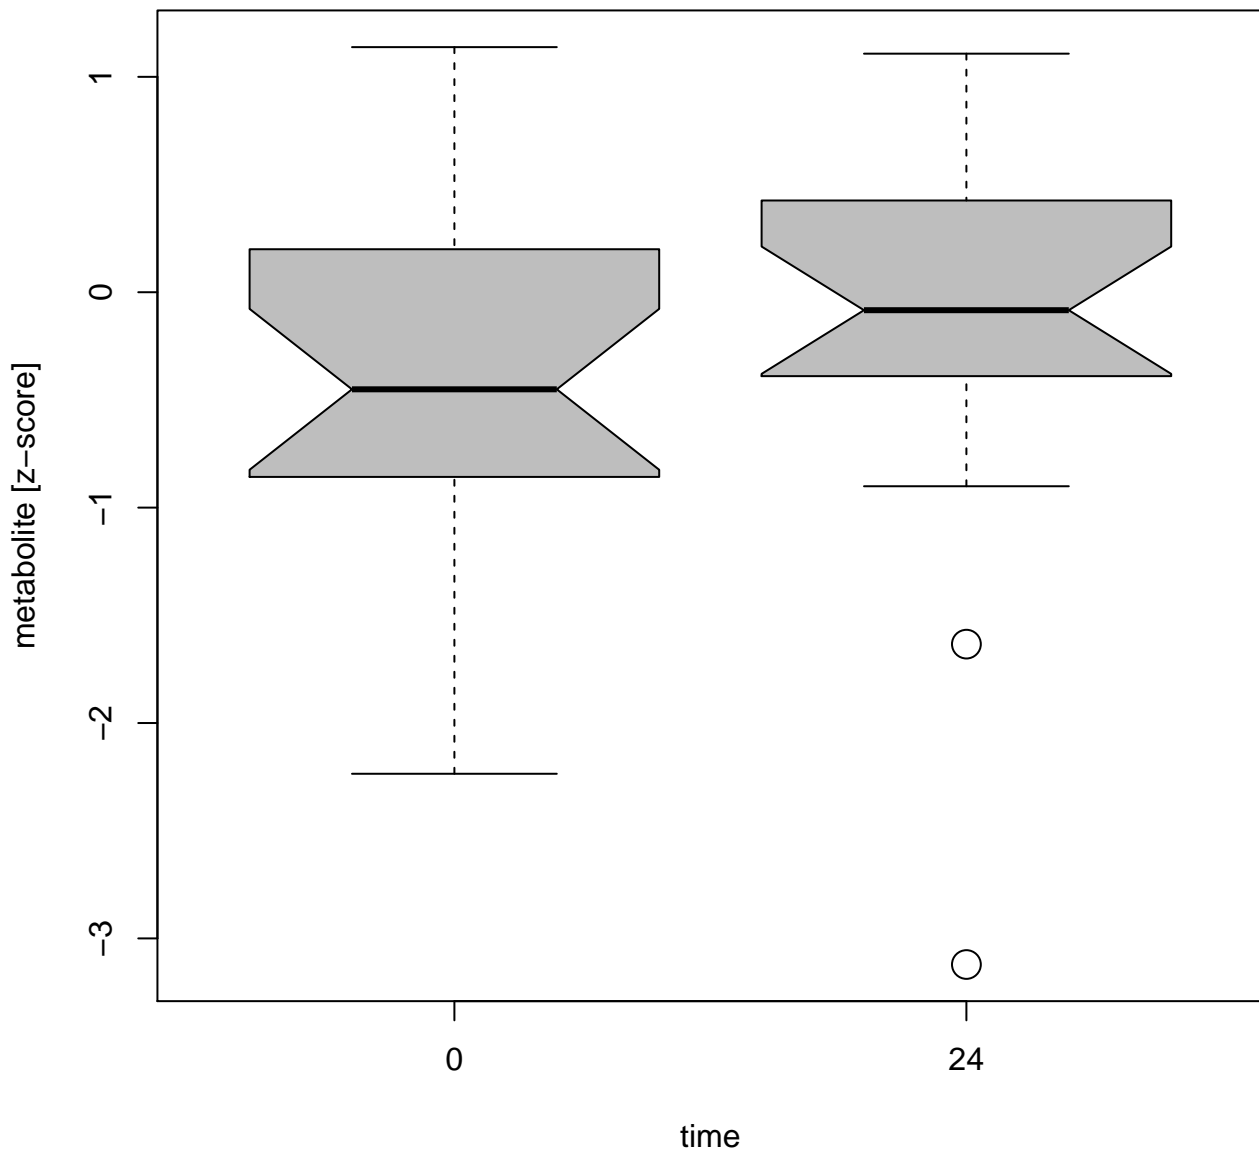

**spermidine**

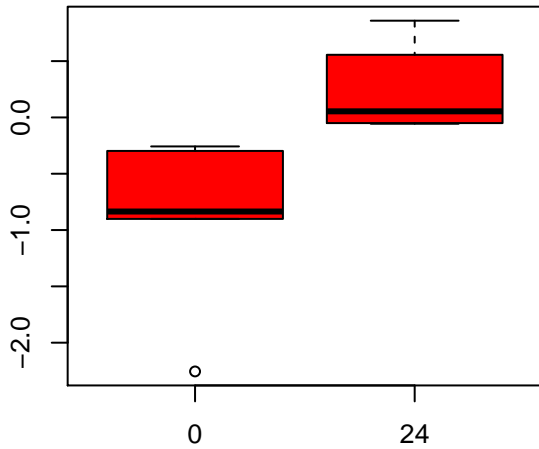

HCT116

**spermidine**

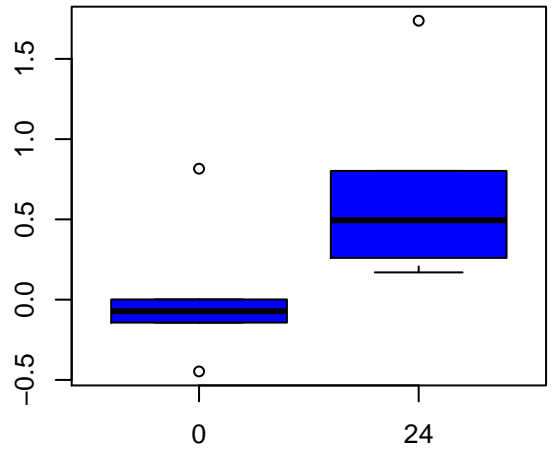

OVCAR

**spermidine**

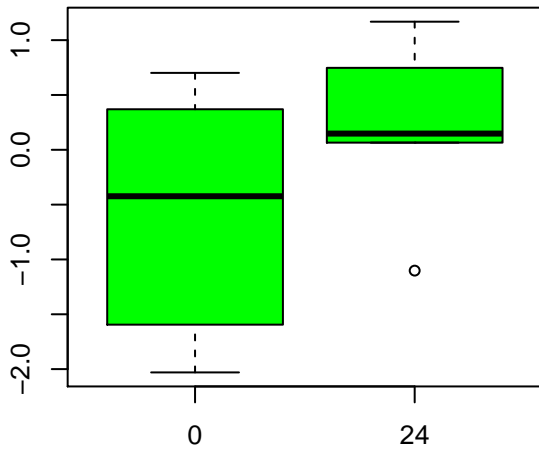

HCT15

**spermidine**

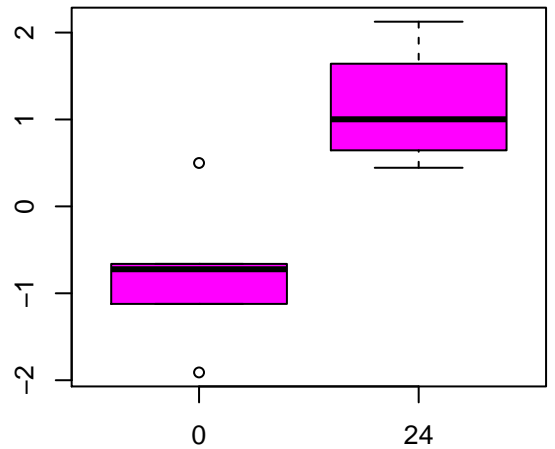

SKOV3

# spermidine

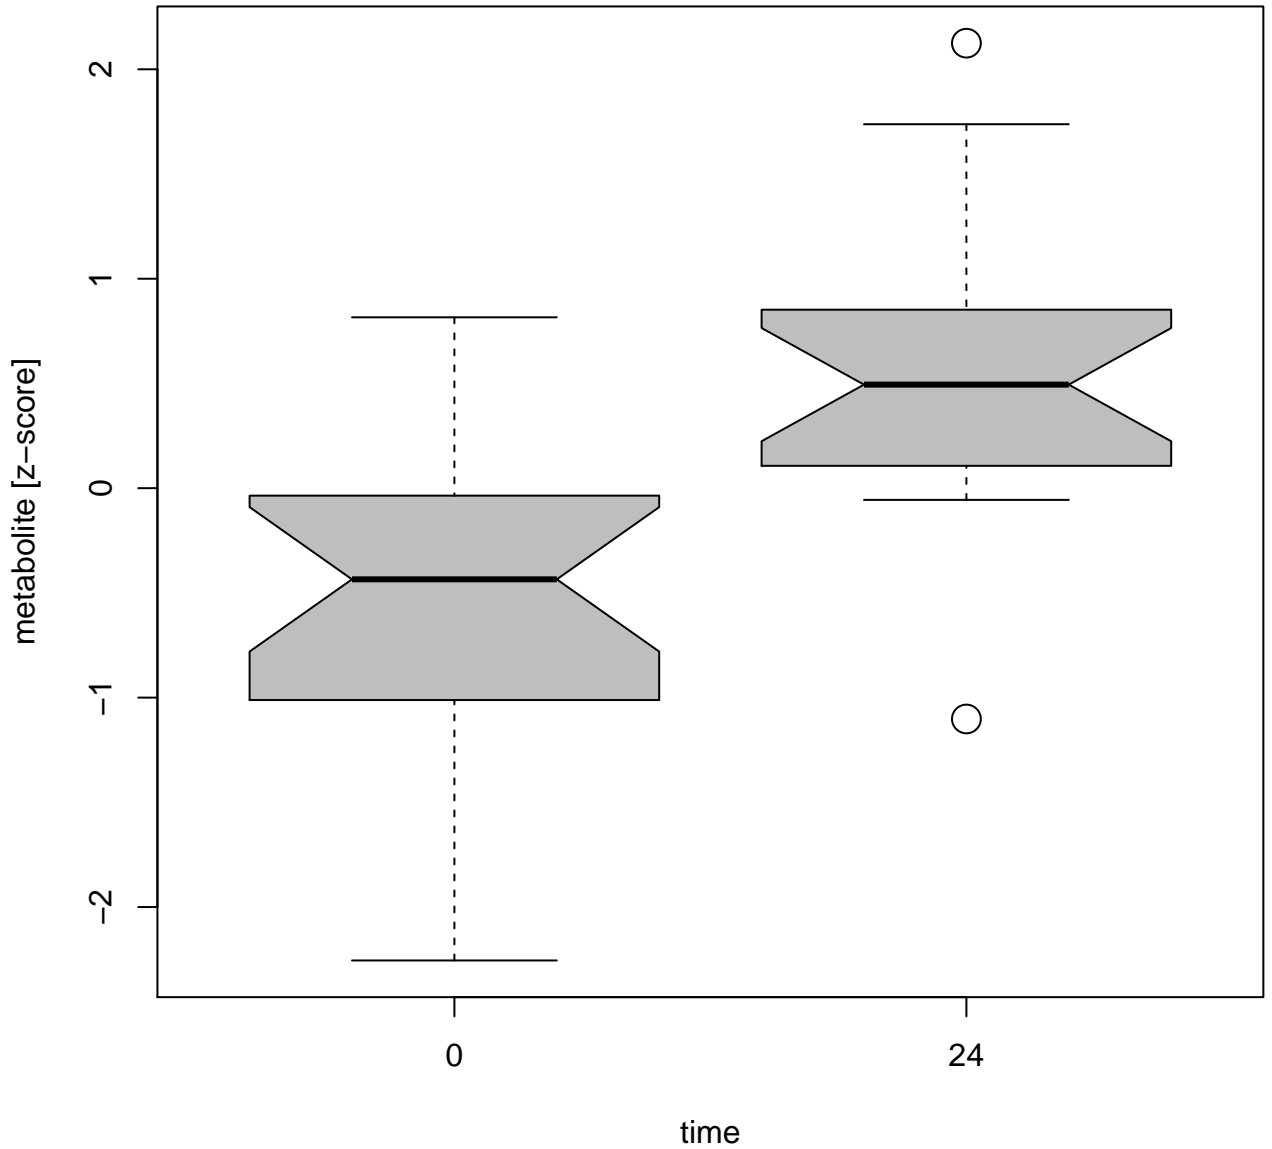

**spermine**

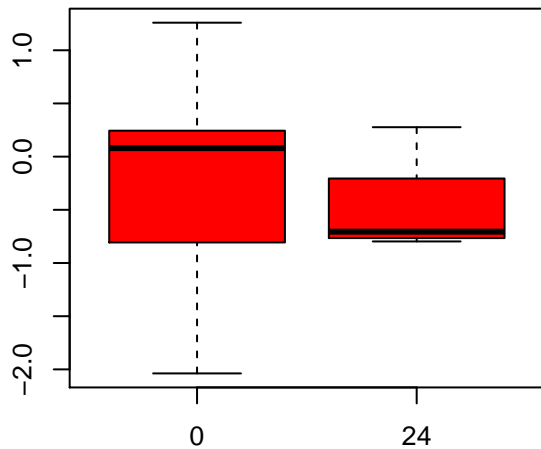

HCT116

**spermine**

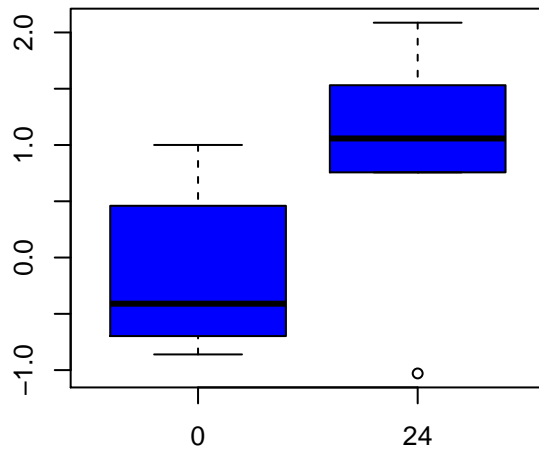

OVCAR

**spermine**

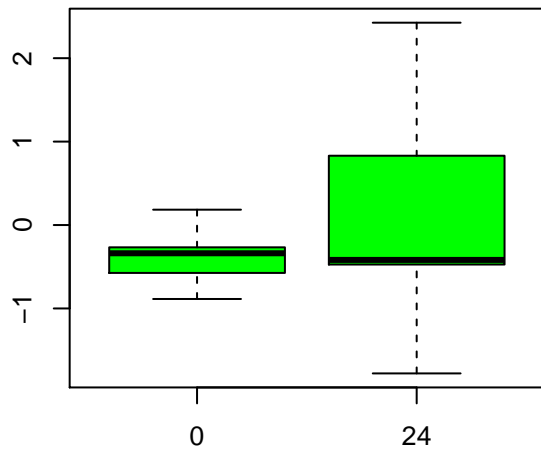

HCT15

**spermine**

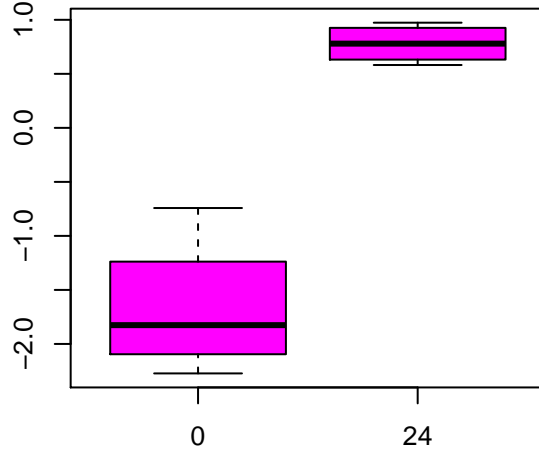

SKOV3



# spermine

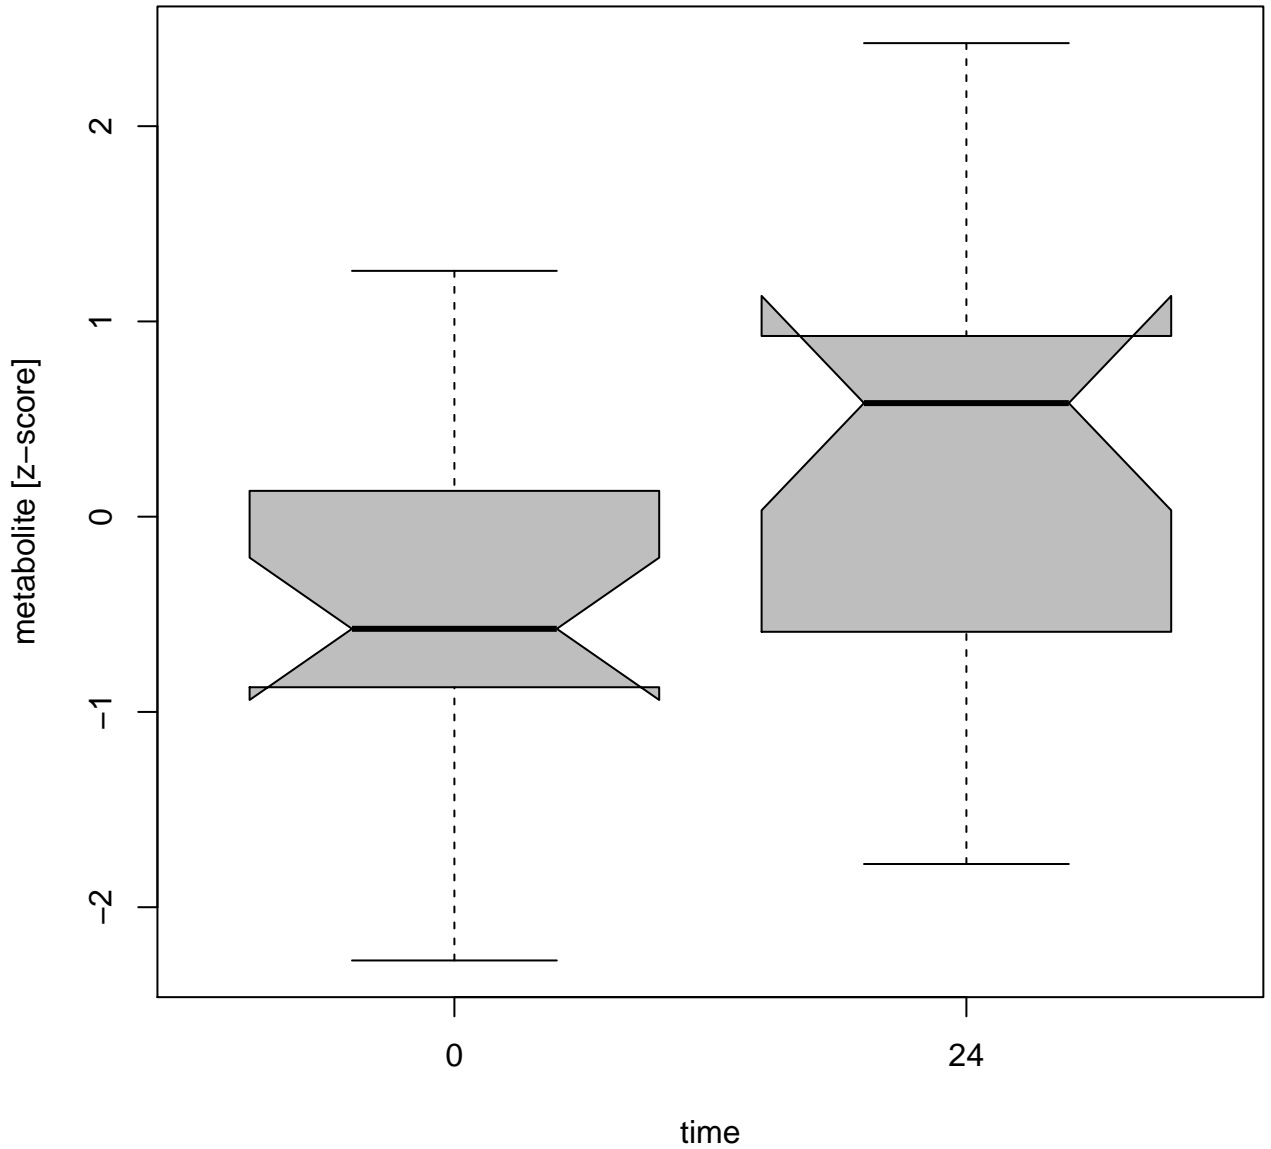

**threonine**

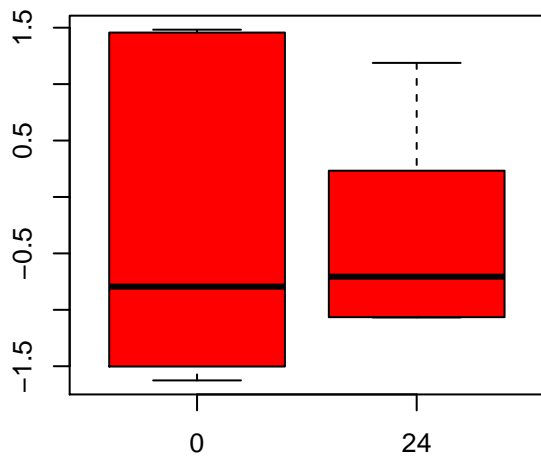

HCT116

**threonine**

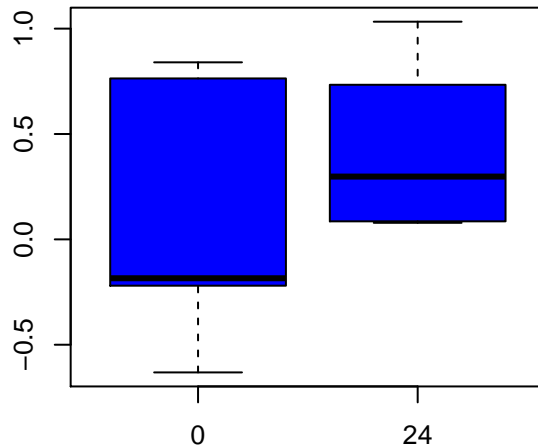

OVCAR

**threonine**

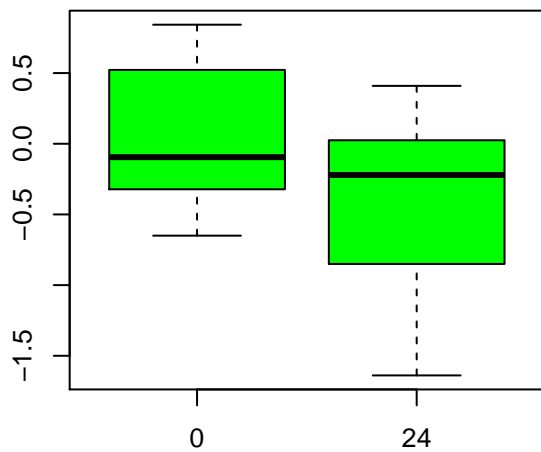

HCT15

**threonine**

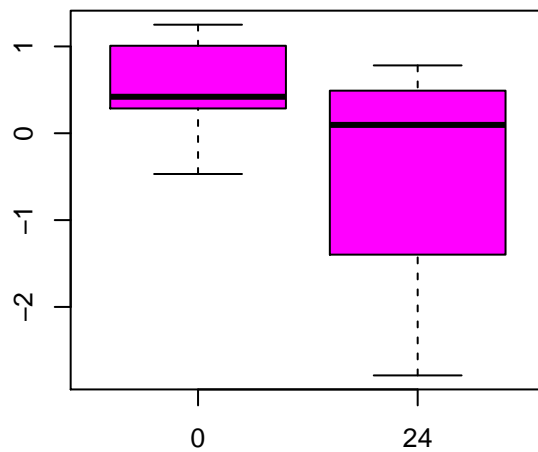

SKOV3

# threonine

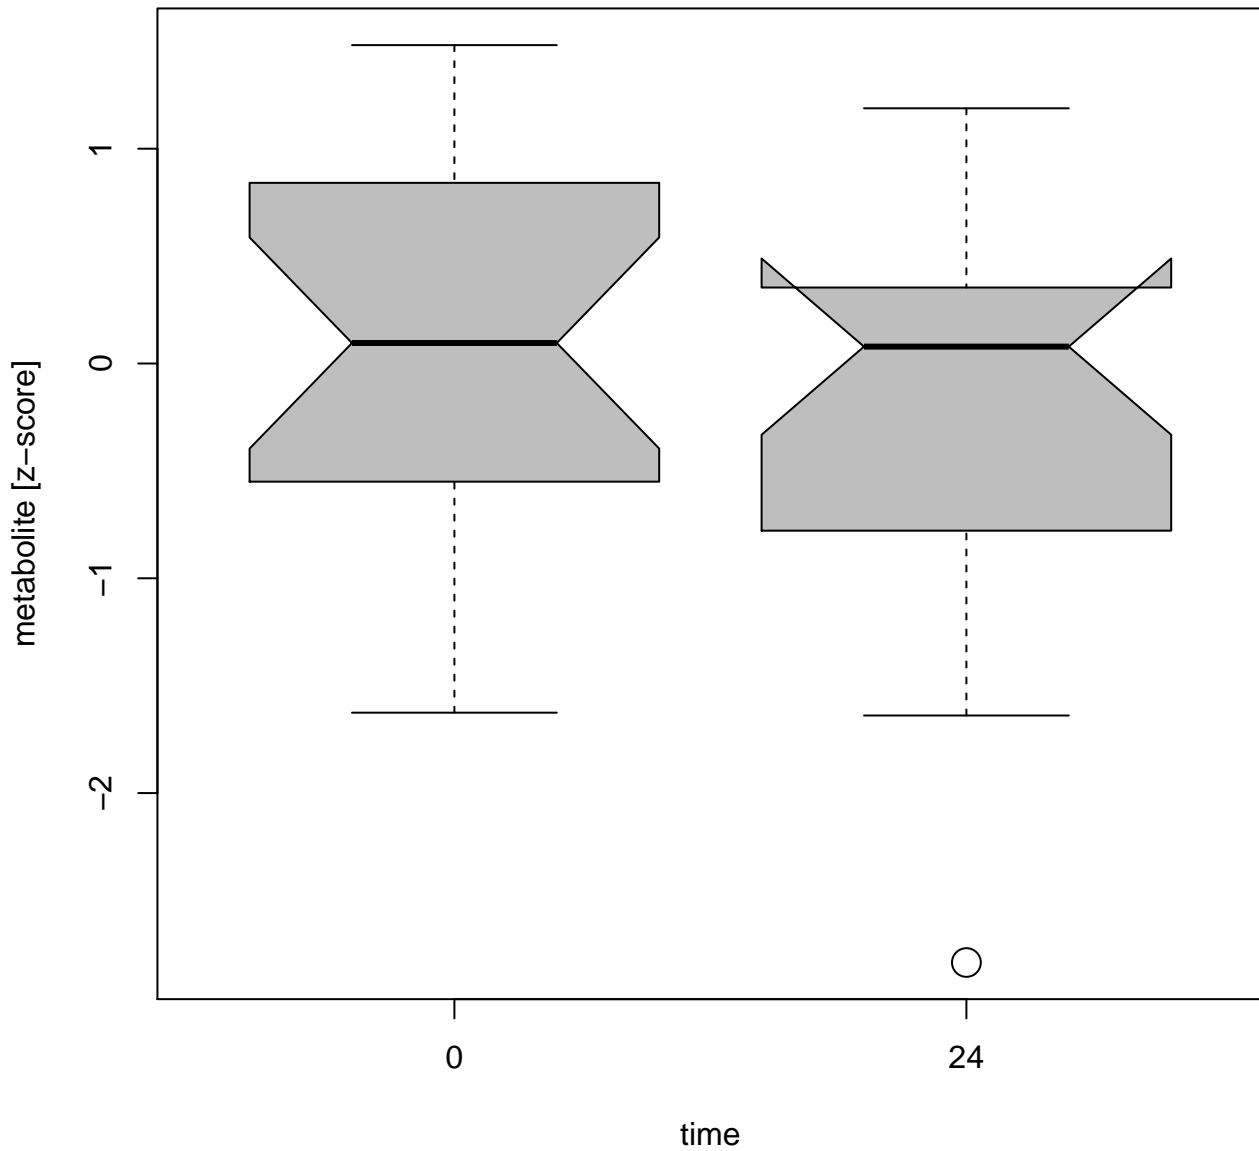

**threonylleucine**

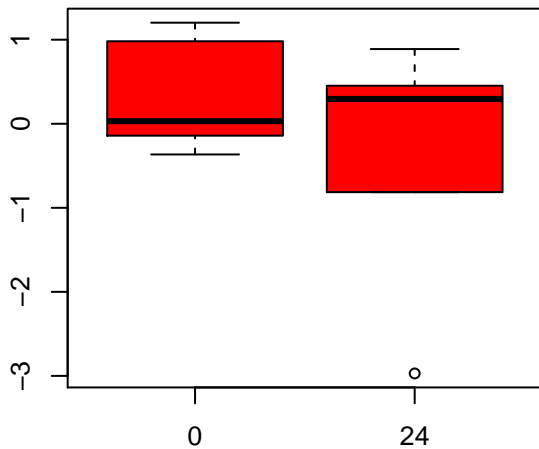

HCT116

**threonylleucine**

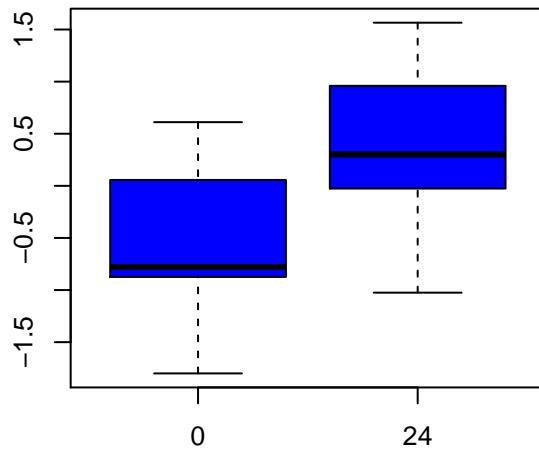

OVCAR

**threonylleucine**

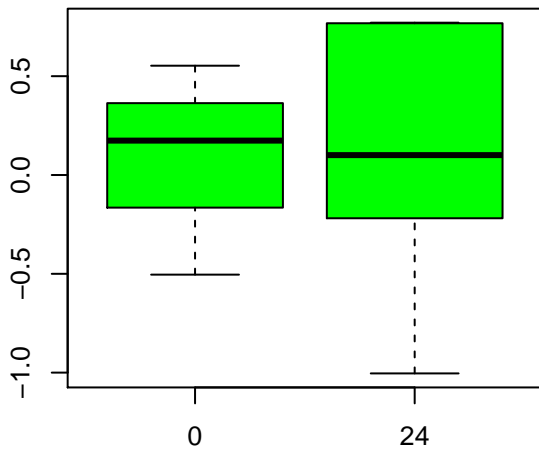

HCT15

**threonylleucine**

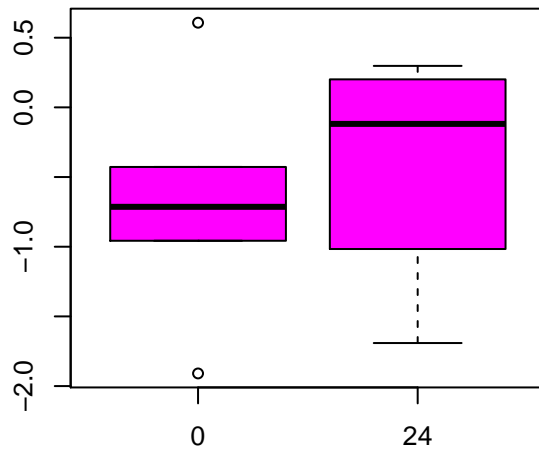

SKOV3

# threonylleucine

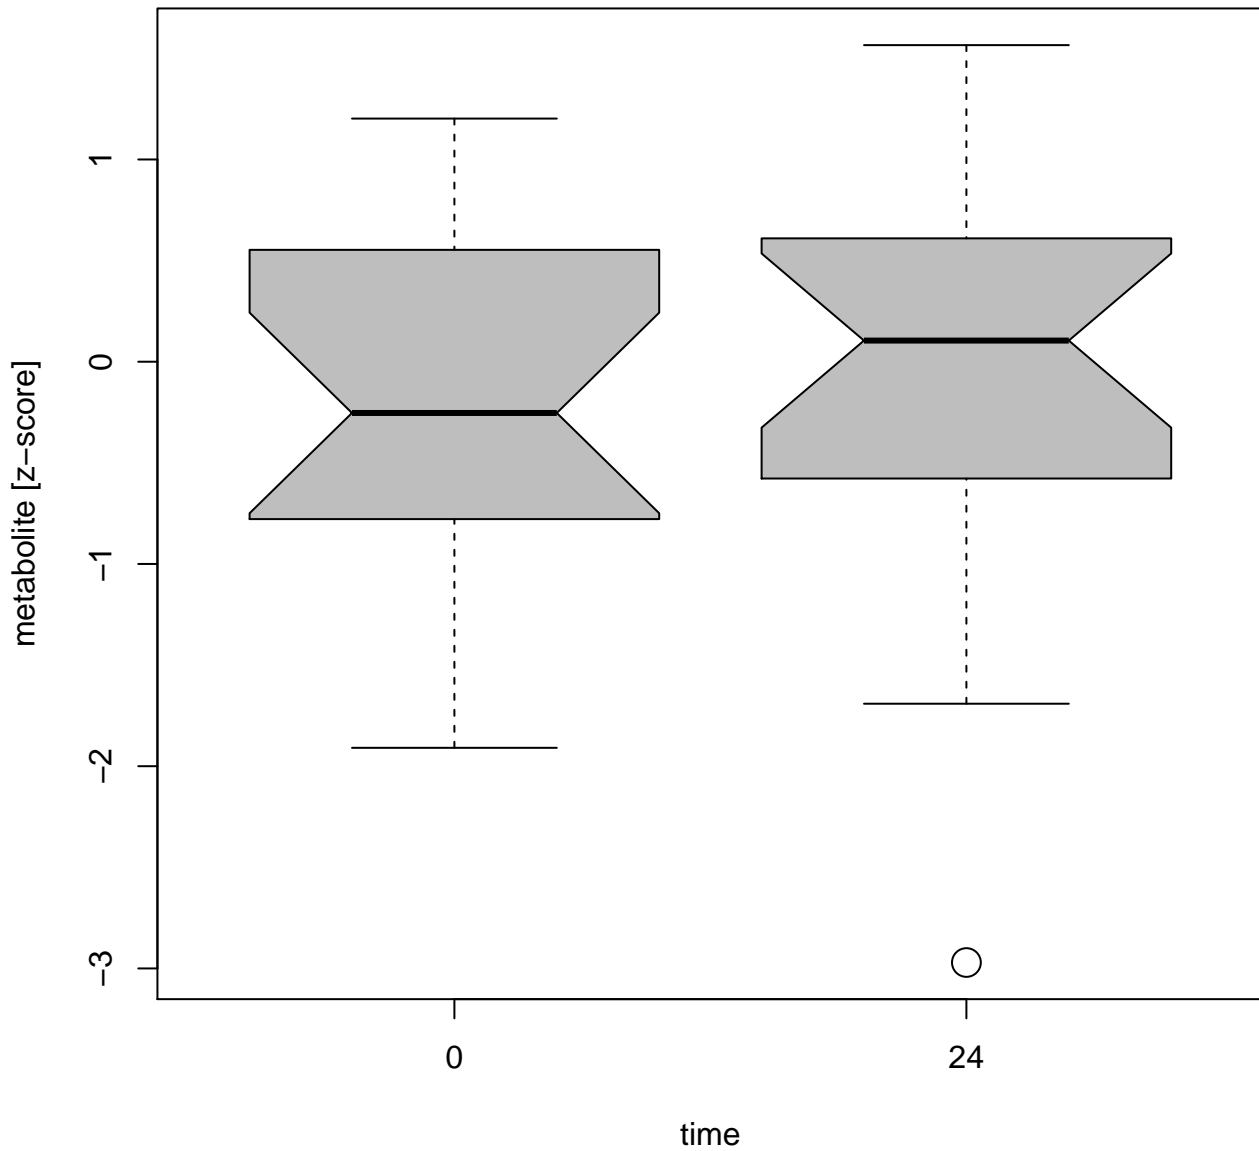

**threonylphenylalanine**

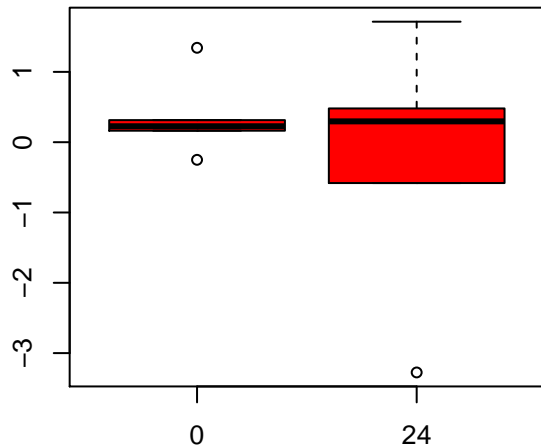

HCT116

**threonylphenylalanine**

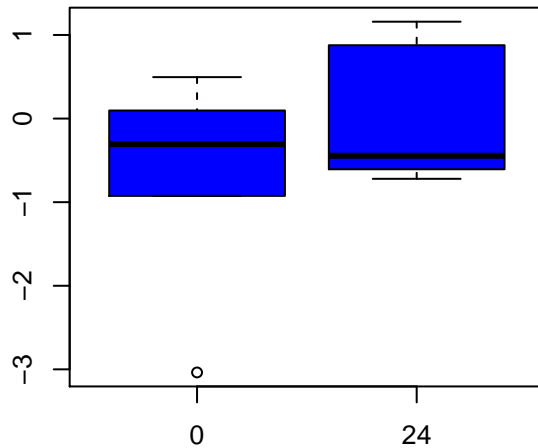

OVCAR

**threonylphenylalanine**

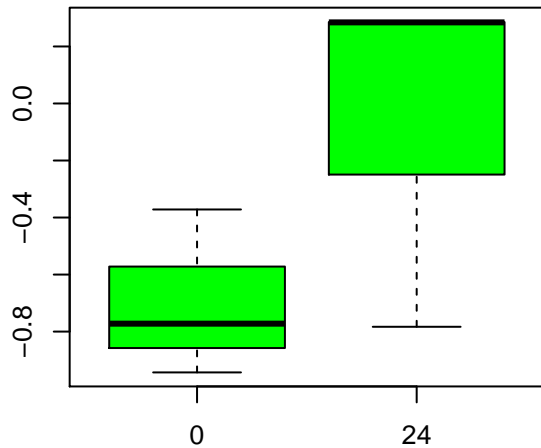

HCT15

**threonylphenylalanine**

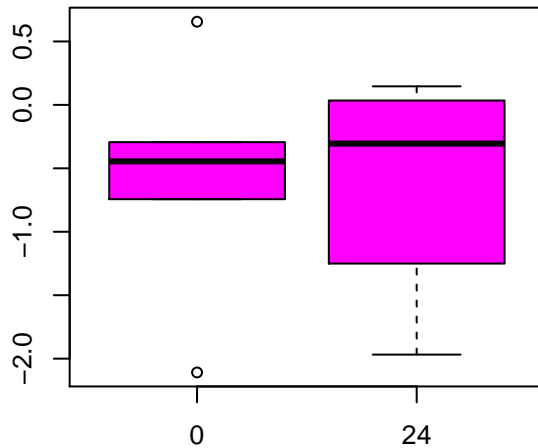

SKOV3

# threonylphenylalanine

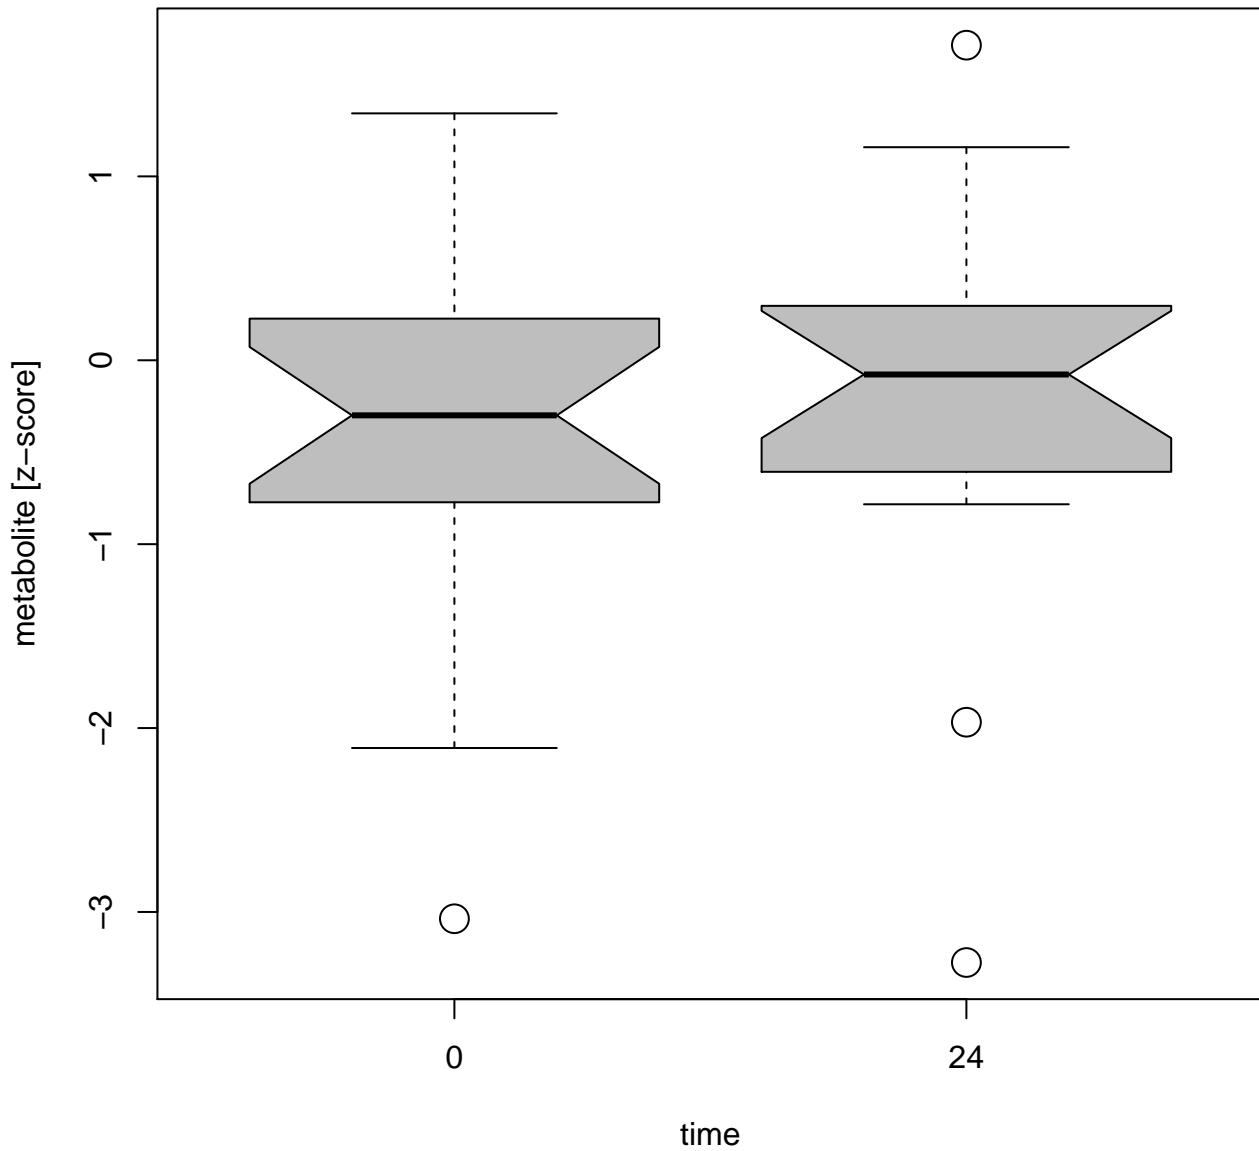

**threonylvaline**

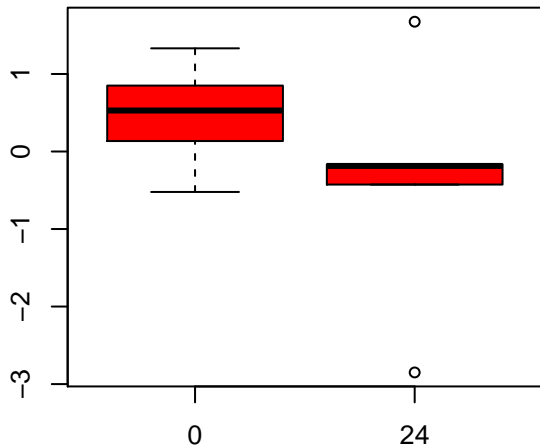

HCT116

**threonylvaline**

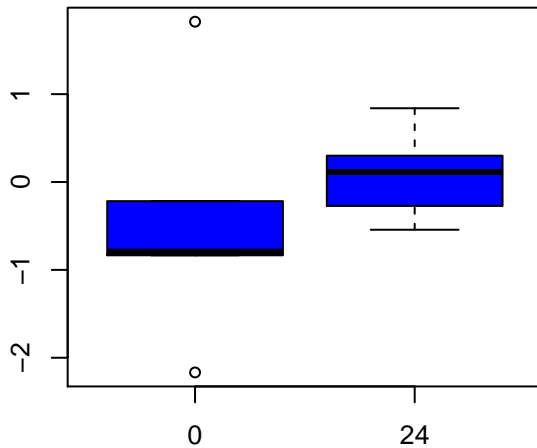

OVCAR

**threonylvaline**

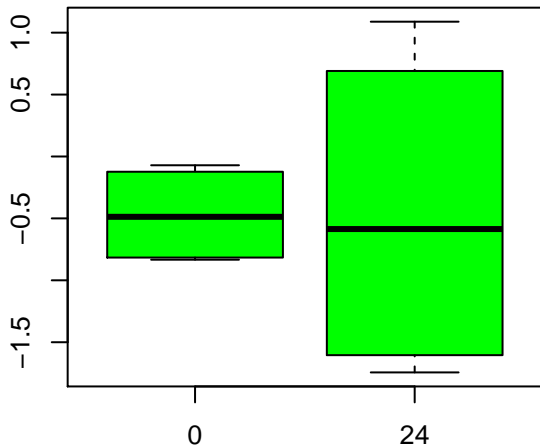

HCT15

**threonylvaline**

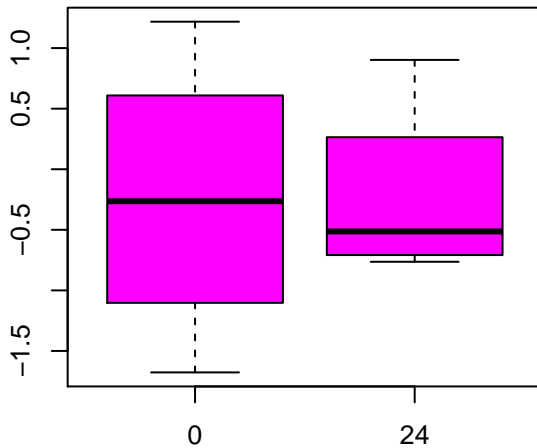

SKOV3



# threonylvaline

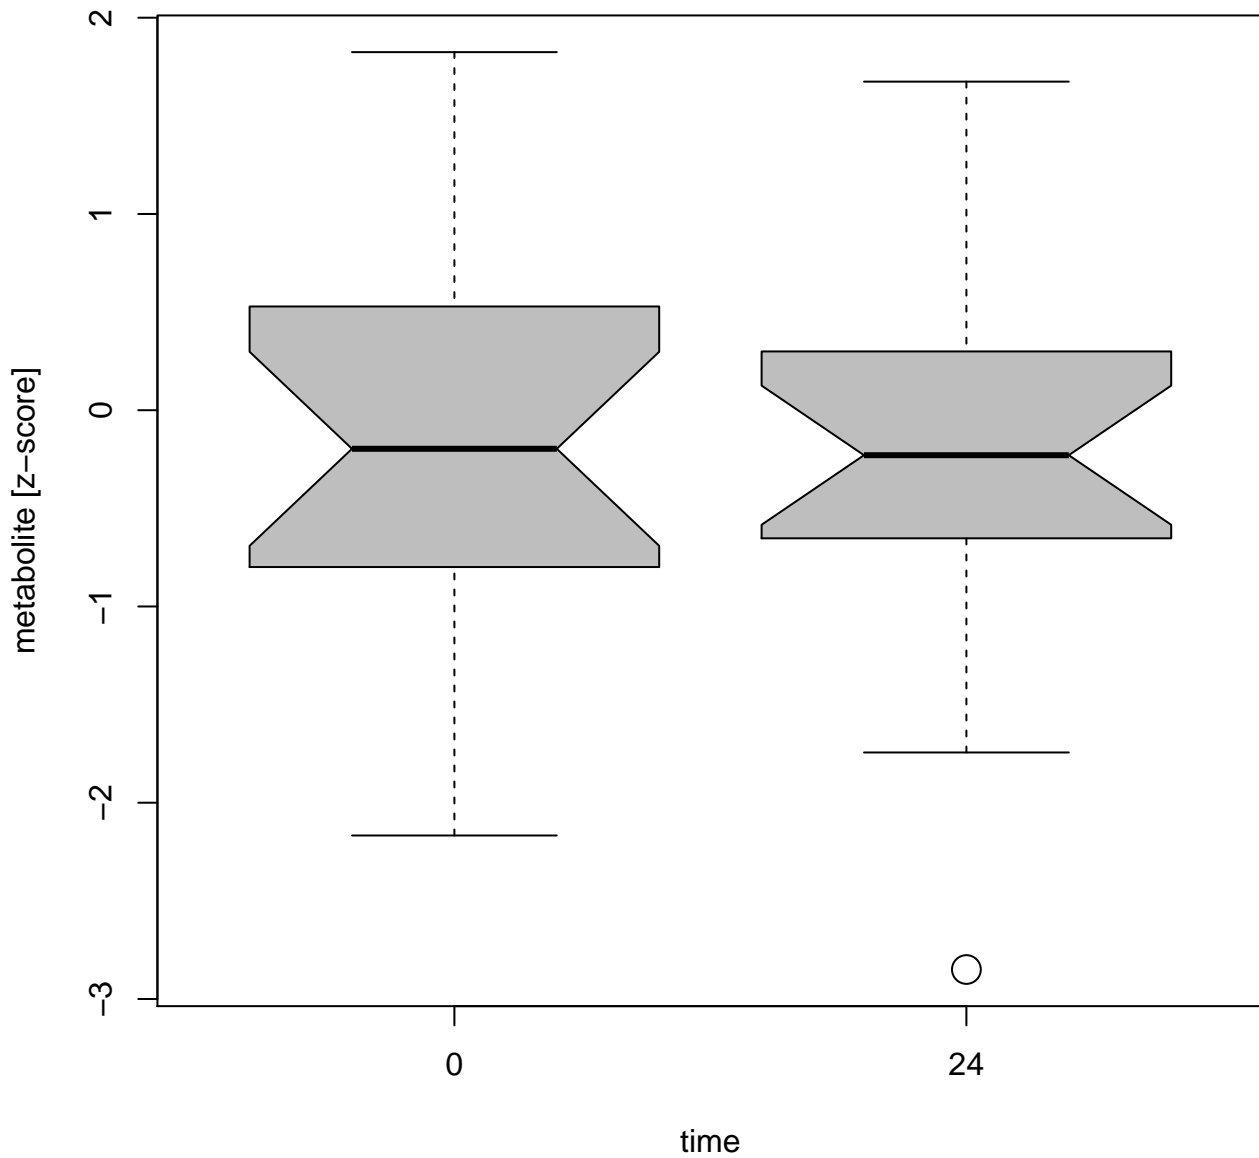

**trans-4-hydroxyproline**

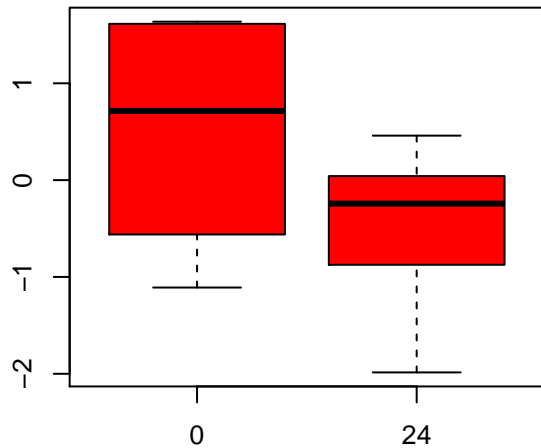

HCT116

**trans-4-hydroxyproline**

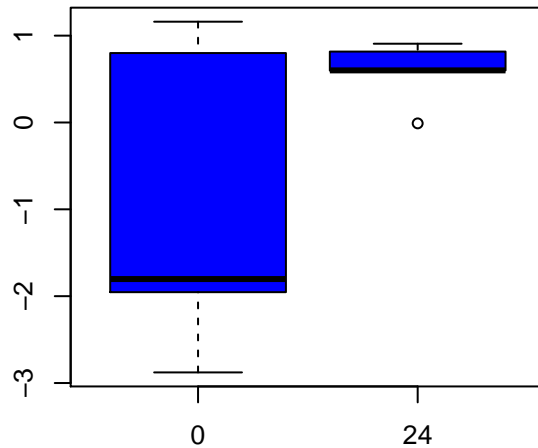

OVCAR

**trans-4-hydroxyproline**

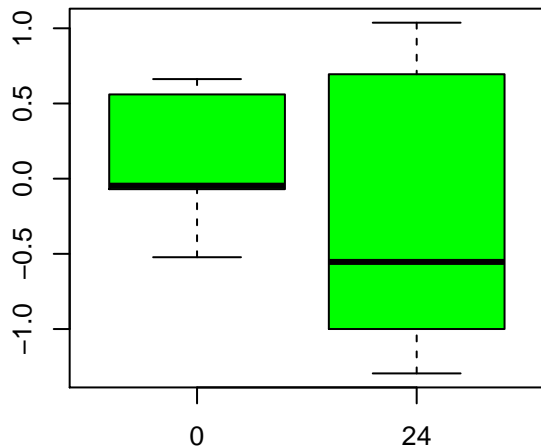

HCT15

**trans-4-hydroxyproline**

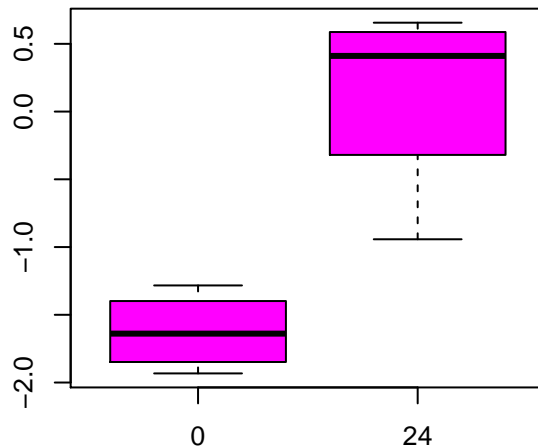

SKOV3

# trans-4-hydroxyproline

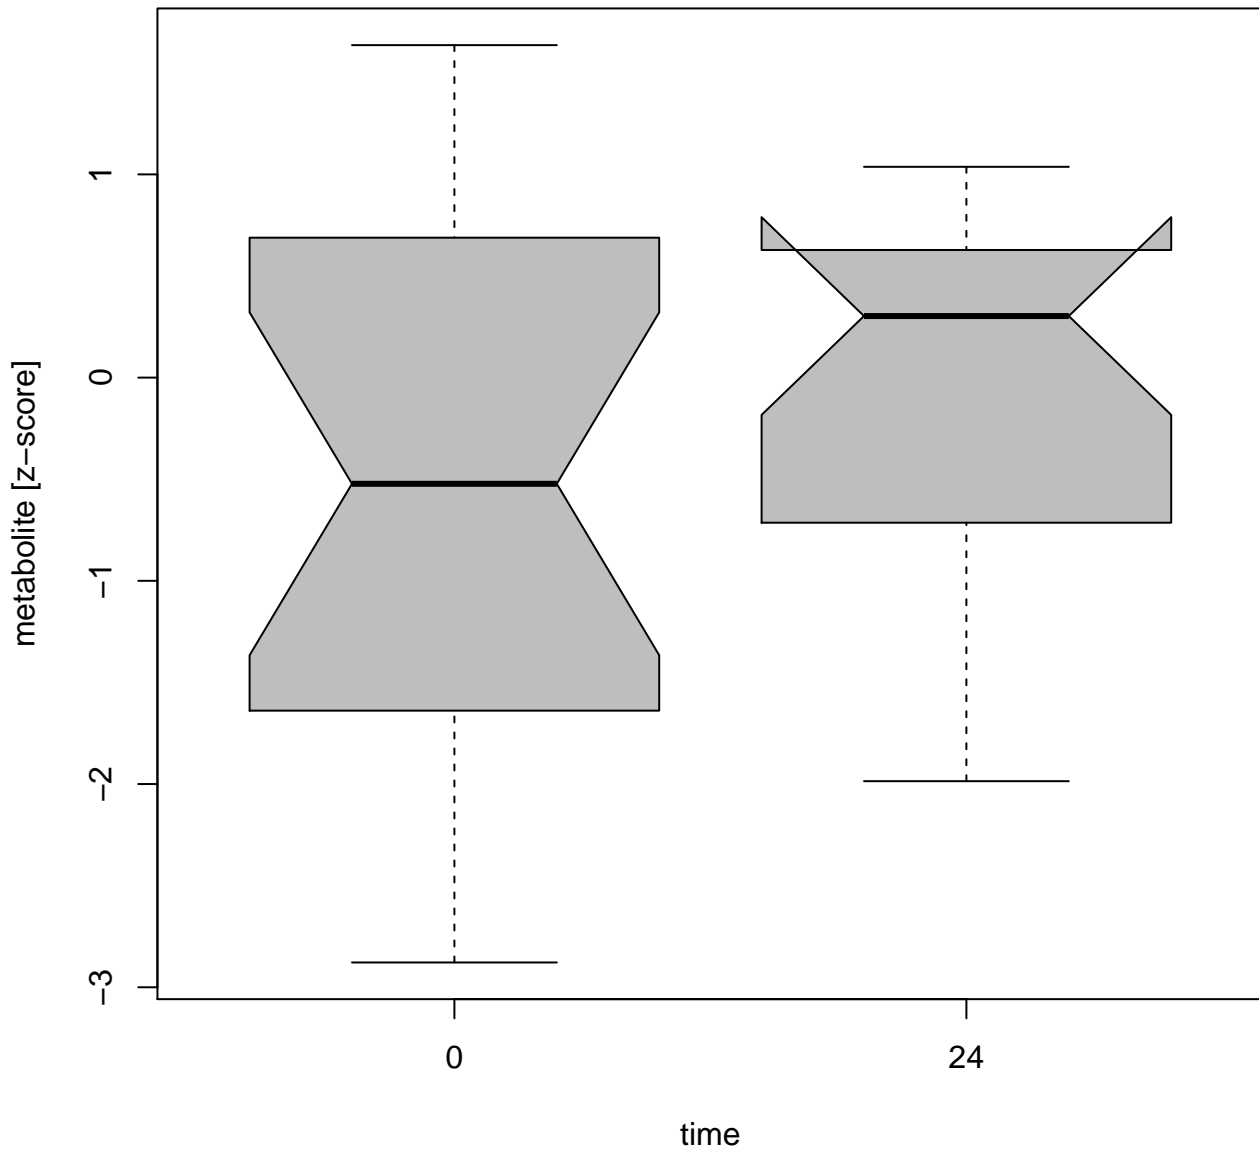

**tyrosine**

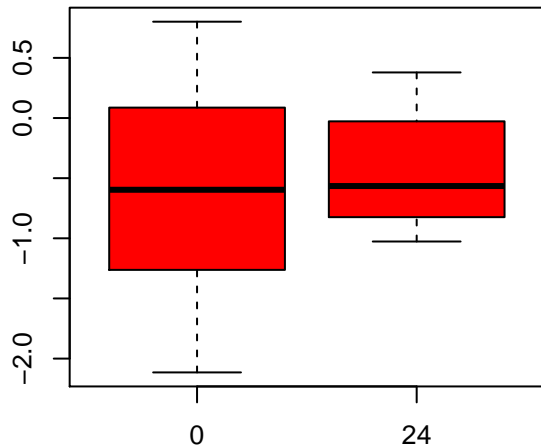

HCT116

**tyrosine**

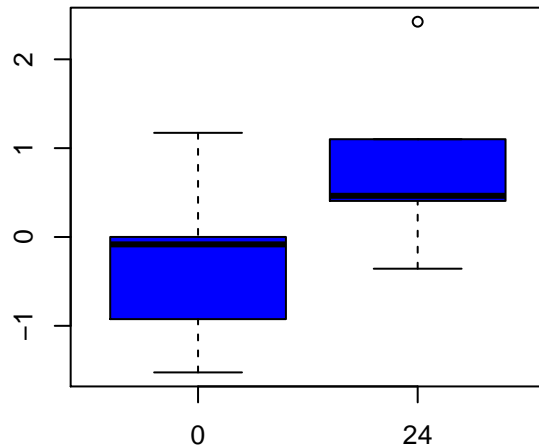

OVCAR

**tyrosine**

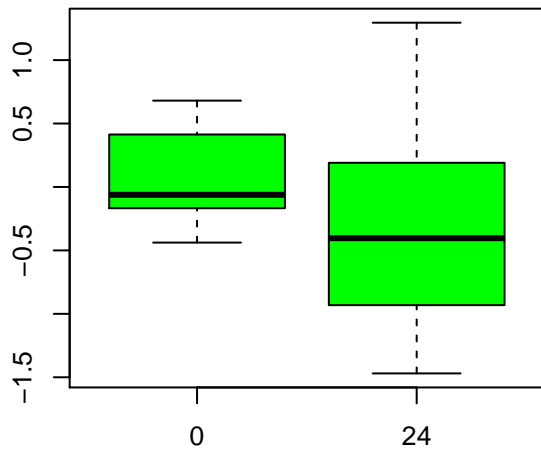

HCT15

**tyrosine**

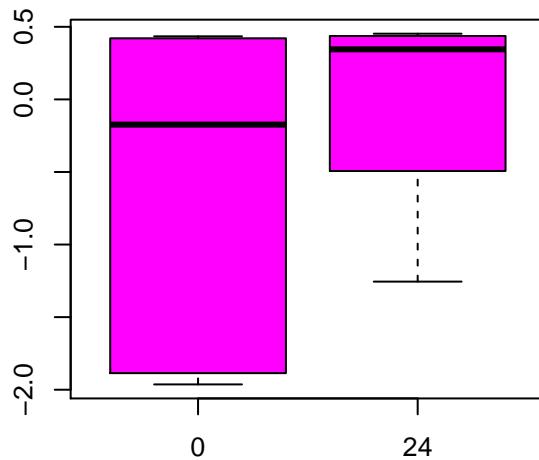

SKOV3

# tyrosine

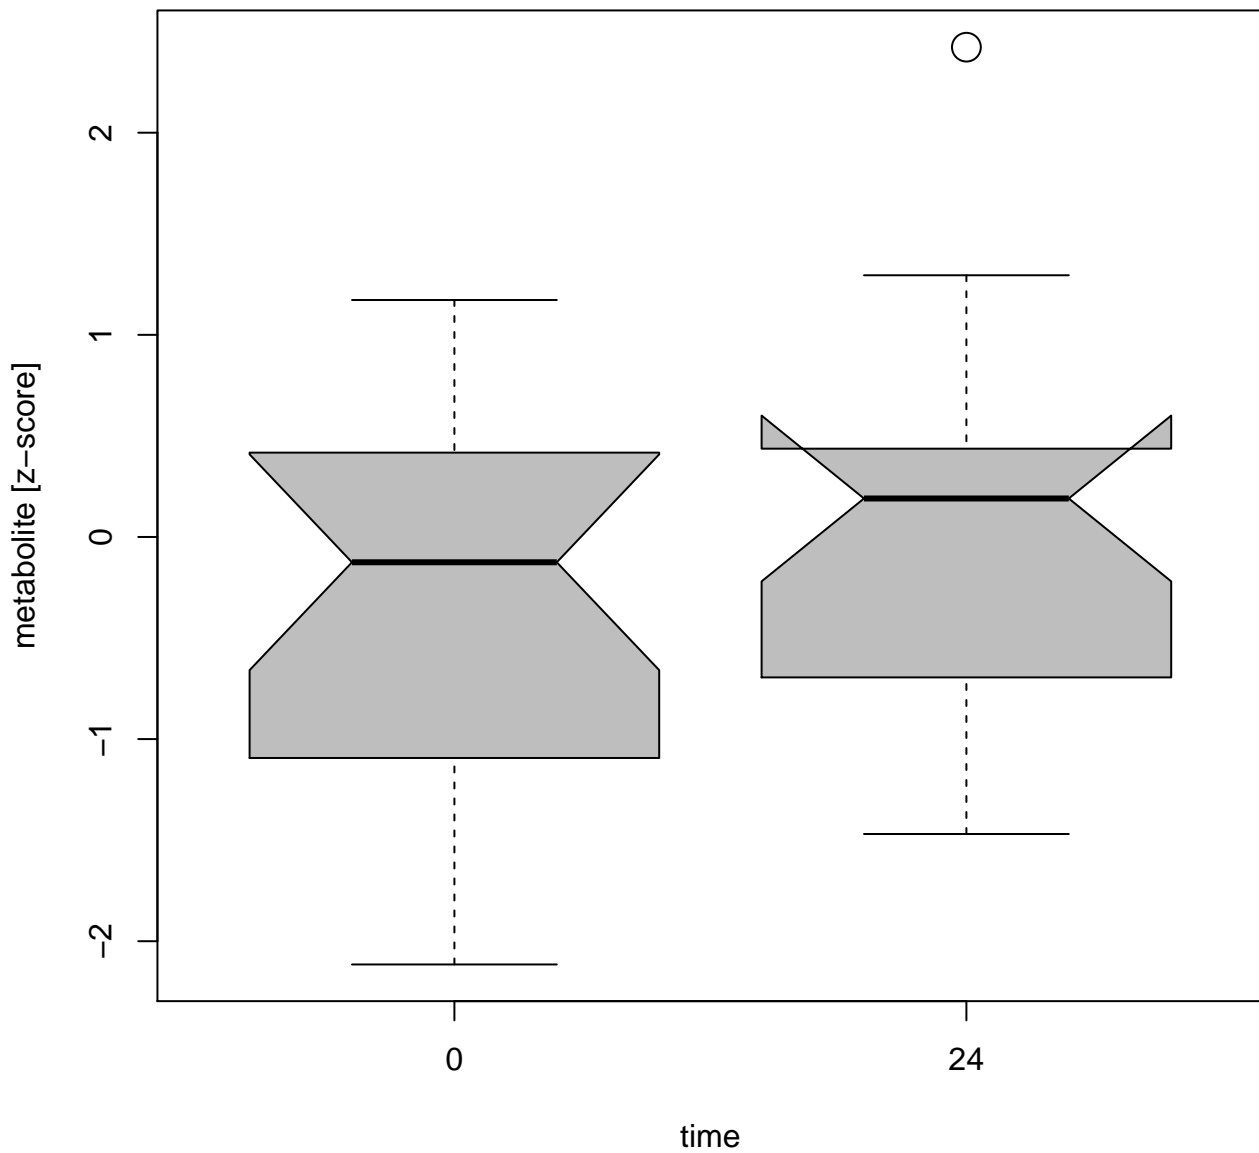

**UDP-glucuronate**

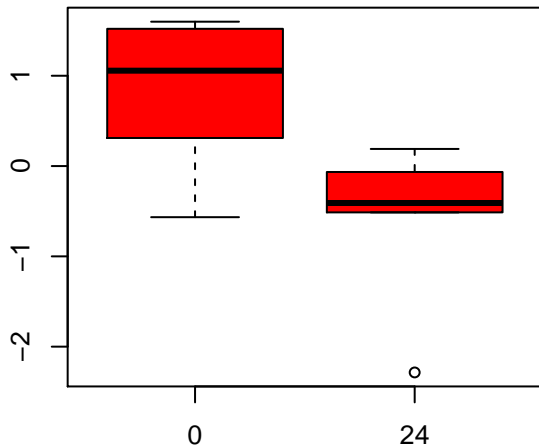

HCT116

**UDP-glucuronate**

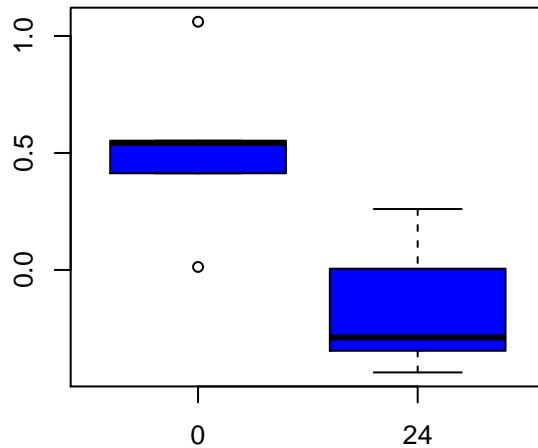

OVCAR

**UDP-glucuronate**

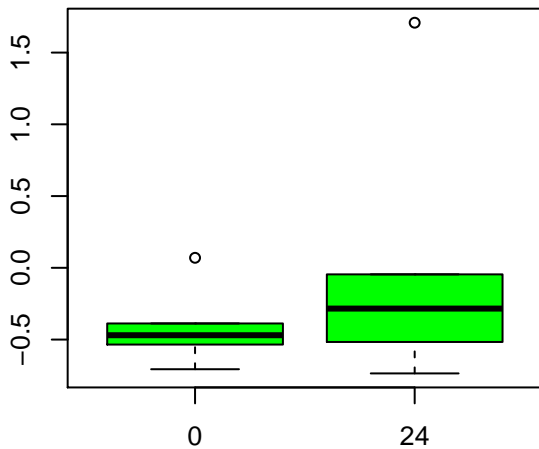

HCT15

**UDP-glucuronate**

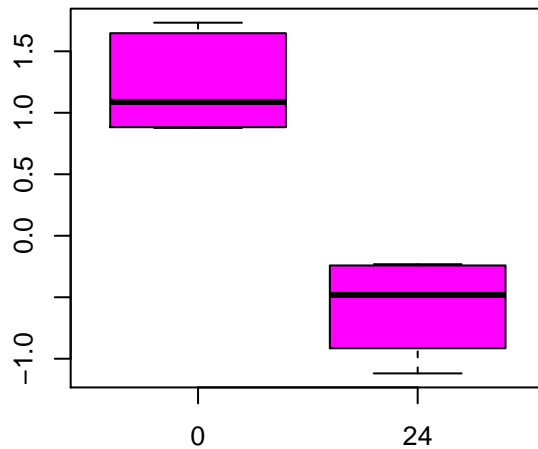

SKOV3

# UDP-glucuronate

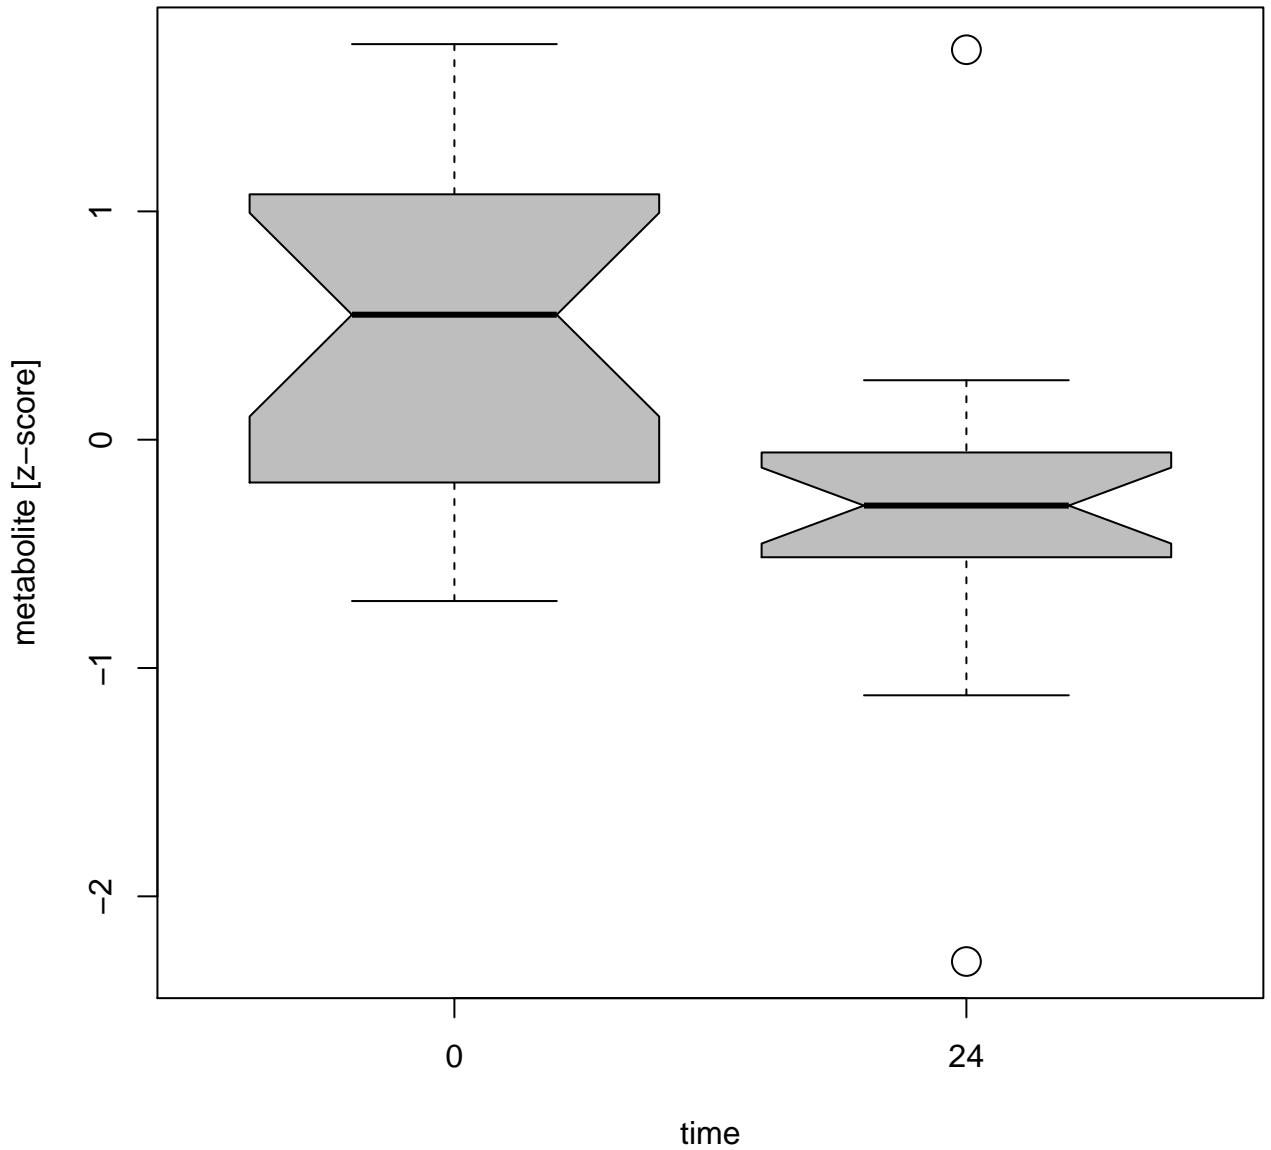

**uracil**

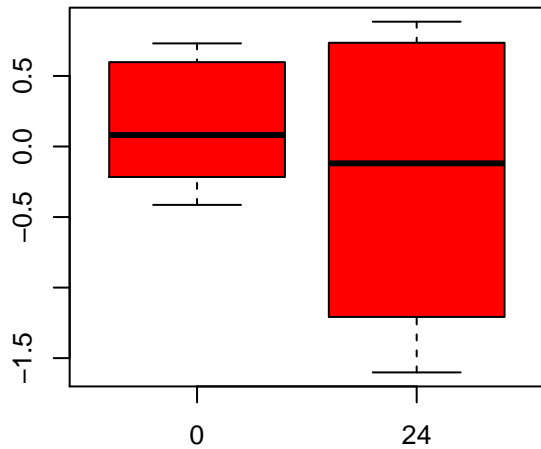

**uracil**

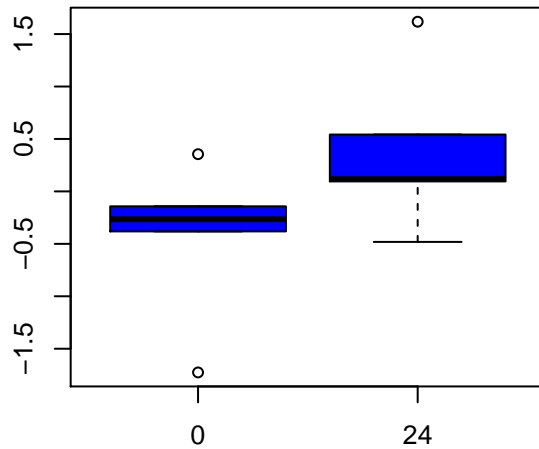

**HCT116**

**uracil**

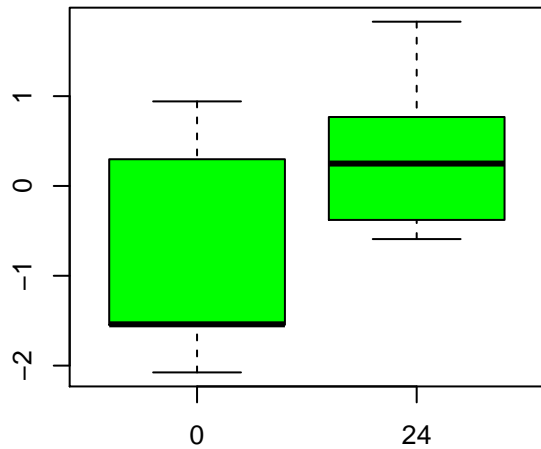

**OVCAR**

**uracil**

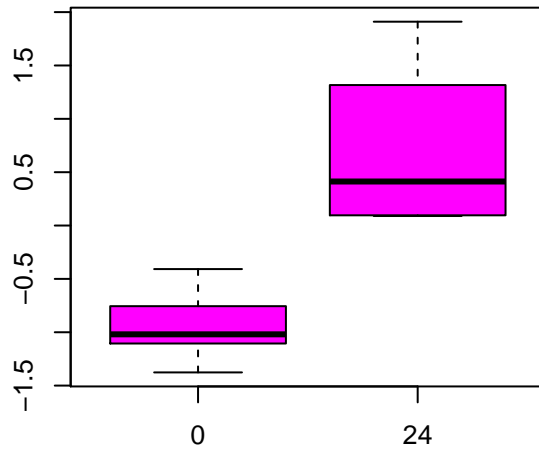

**HCT15**

**SKOV3**



# uracil

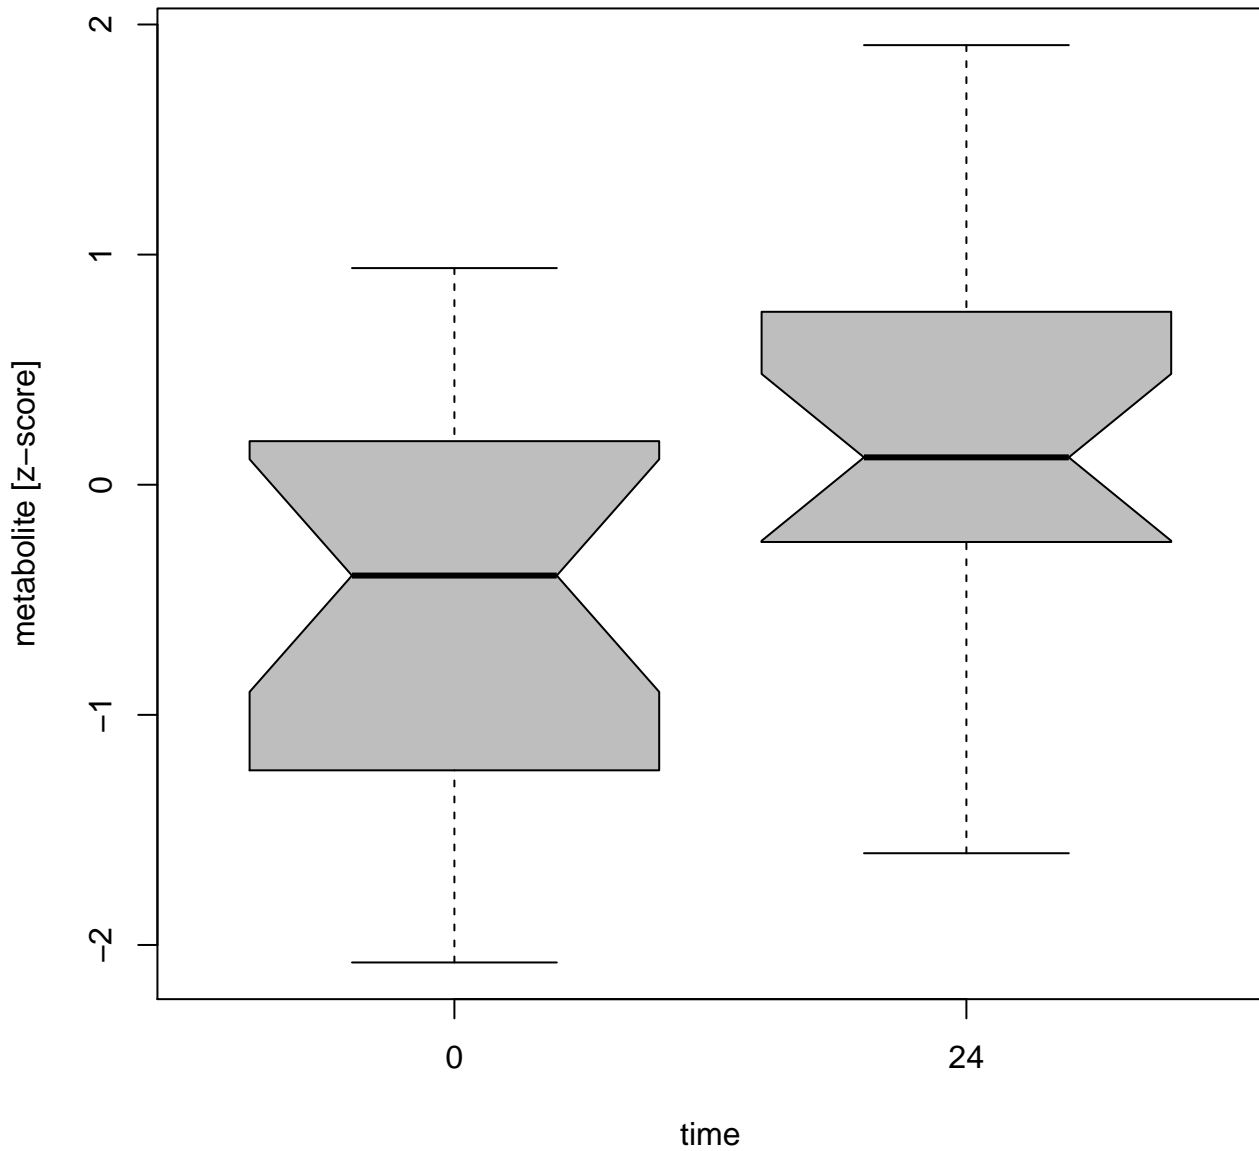

**uridine**

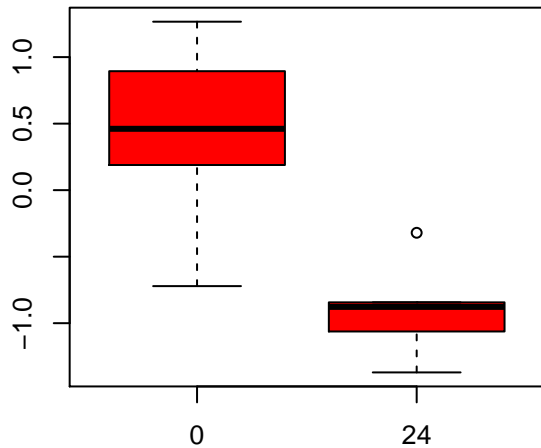

HCT116

**uridine**

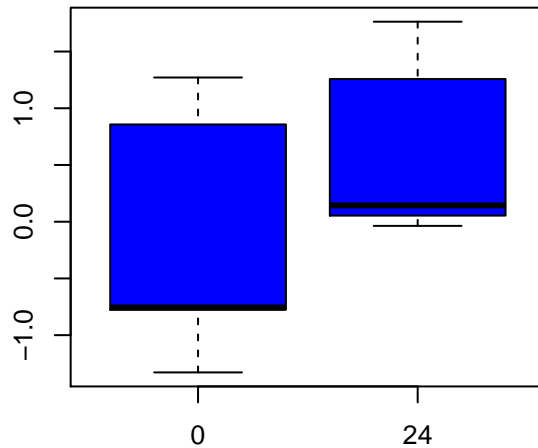

OVCAR

**uridine**

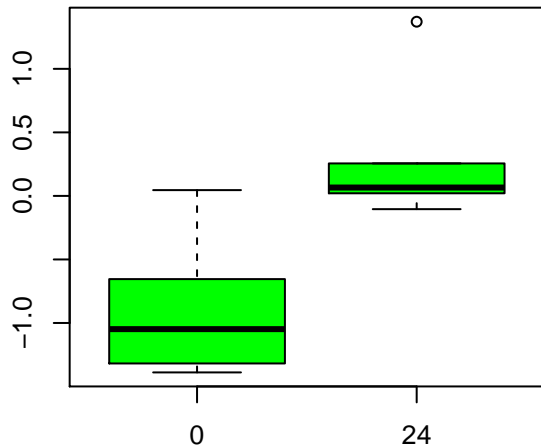

HCT15

**uridine**

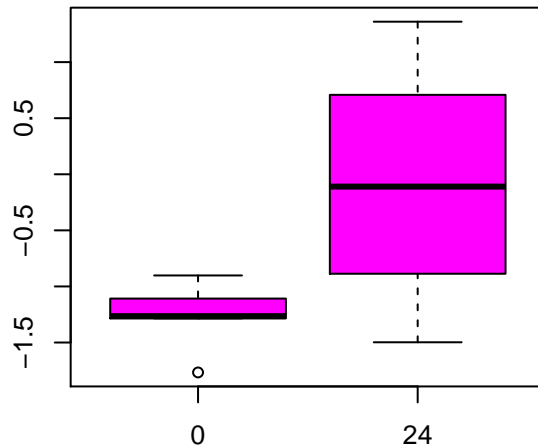

SKOV3

# uridine

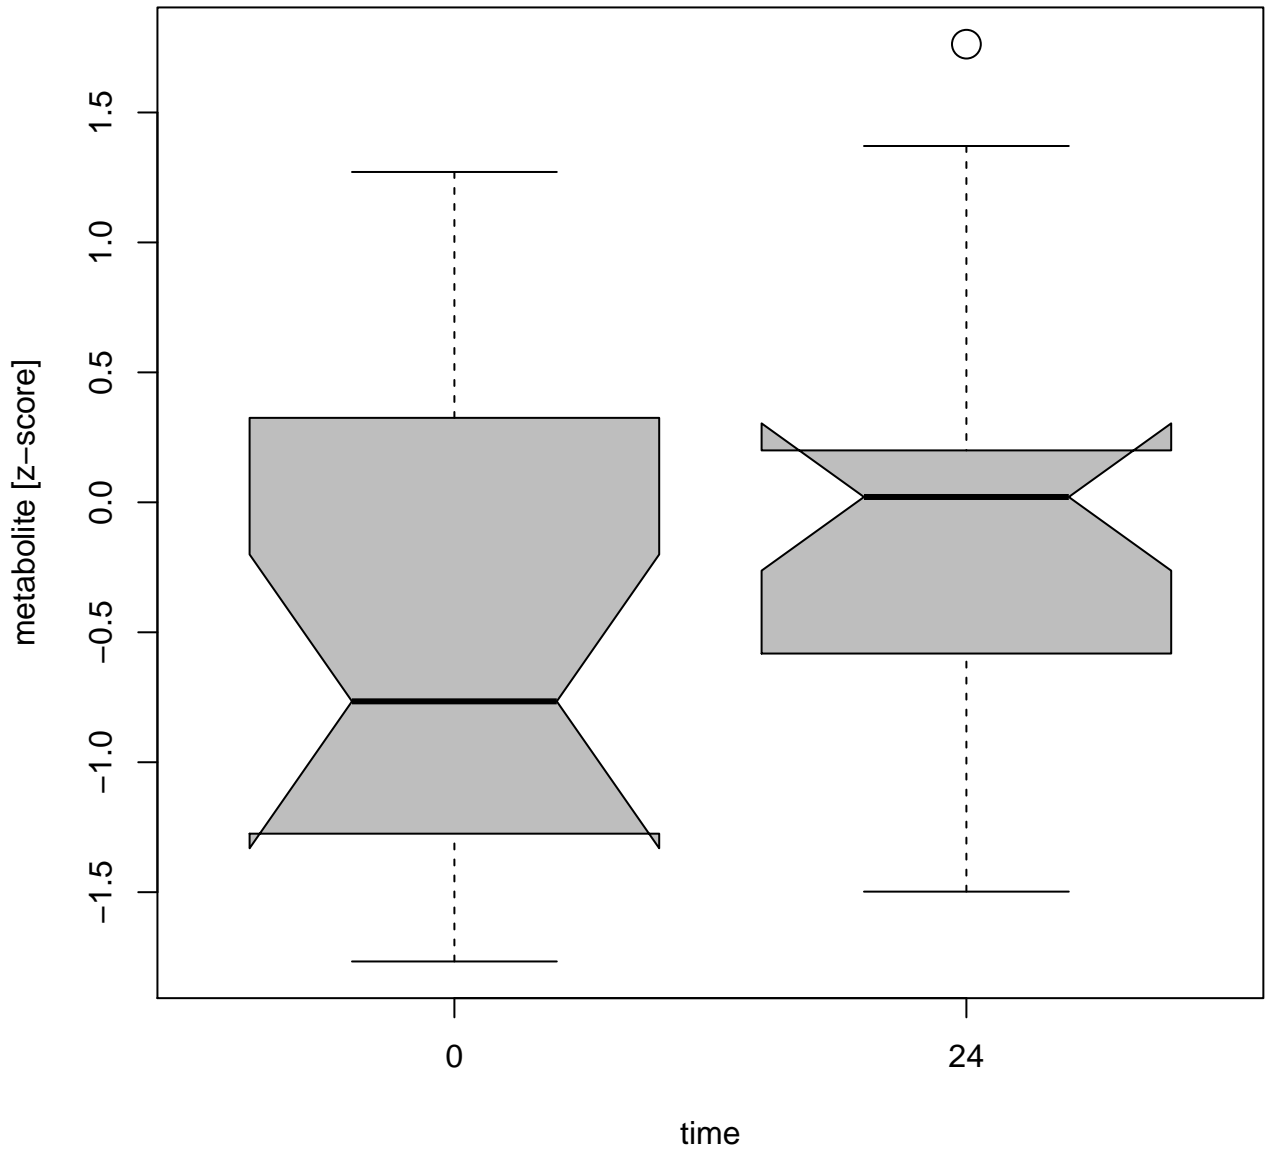

**uridine 5'-diphosphate (UDP)**

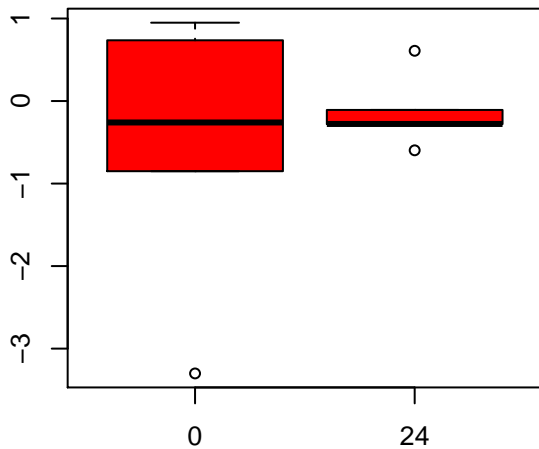

HCT116

**uridine 5'-diphosphate (UDP)**

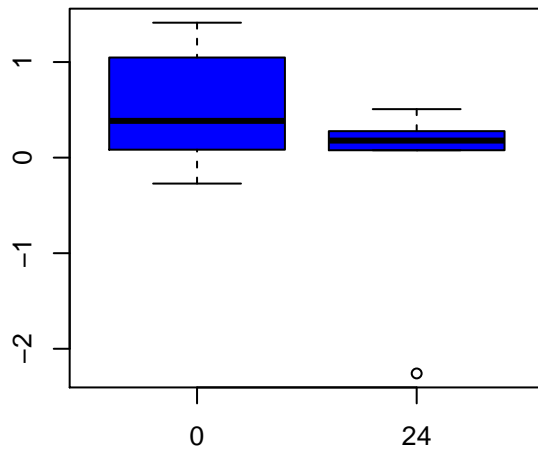

OVCAR

**uridine 5'-diphosphate (UDP)**

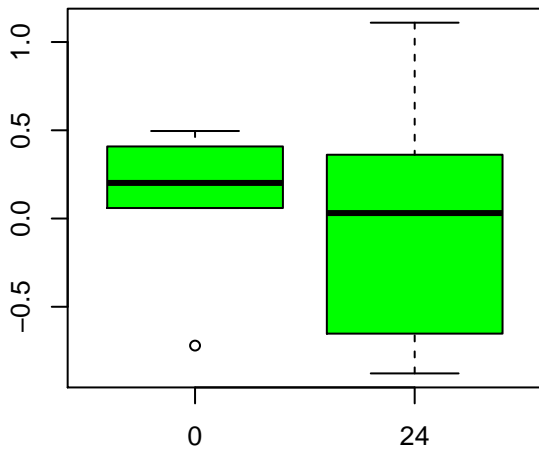

HCT15

**uridine 5'-diphosphate (UDP)**

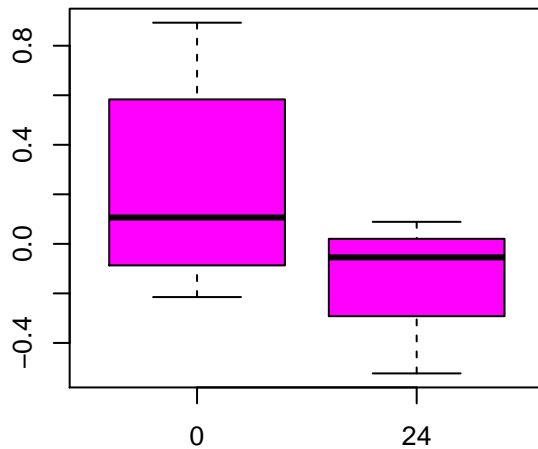

SKOV3

# uridine 5'-diphosphate (UDP)

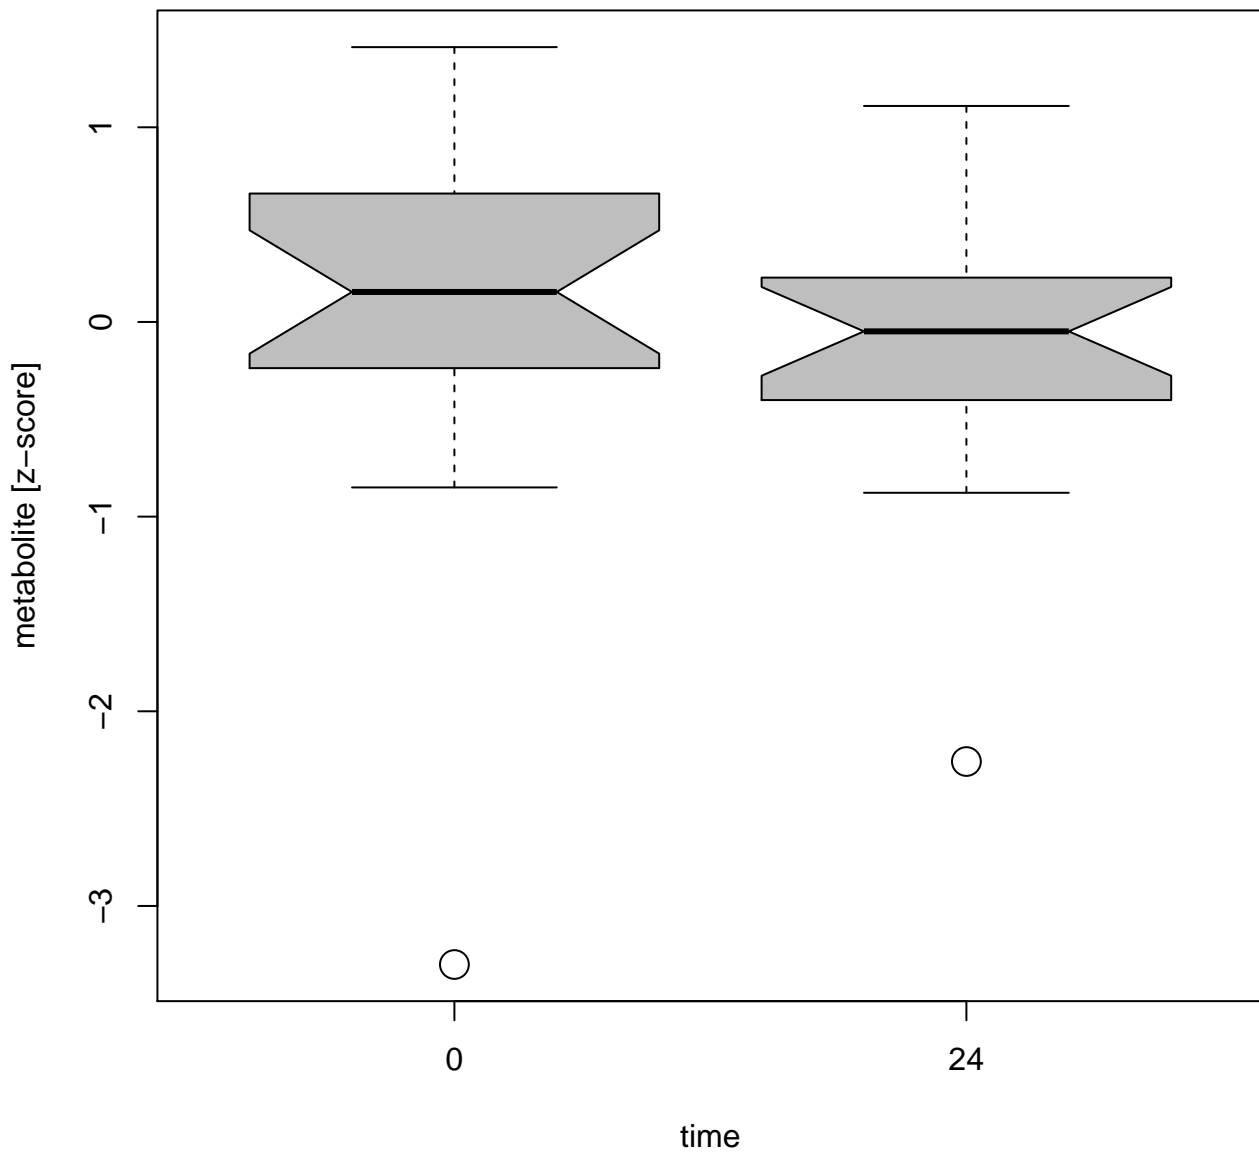

**uridine 5'-triphosphate (UTP)**

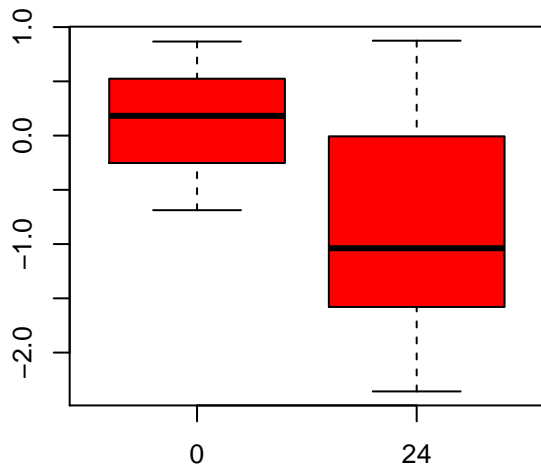

HCT116

**uridine 5'-triphosphate (UTP)**

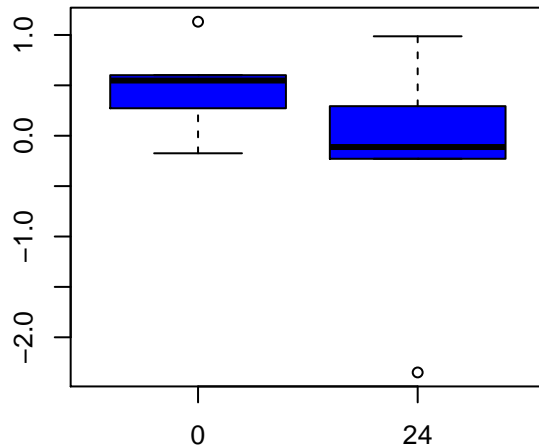

OVCAR

**uridine 5'-triphosphate (UTP)**

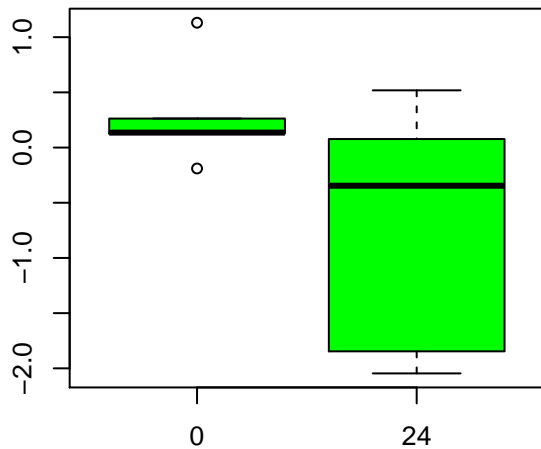

HCT15

**uridine 5'-triphosphate (UTP)**

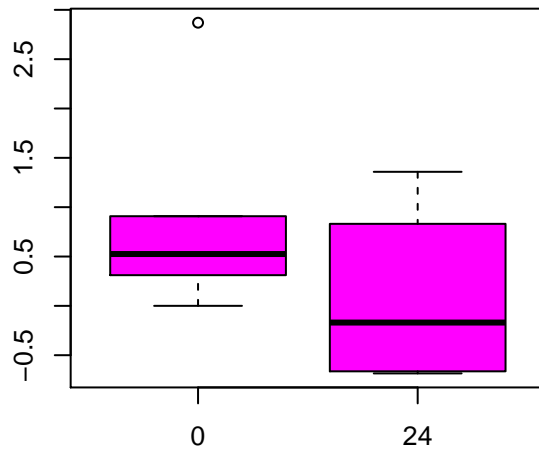

SKOV3

# uridine 5'-triphosphate (UTP)

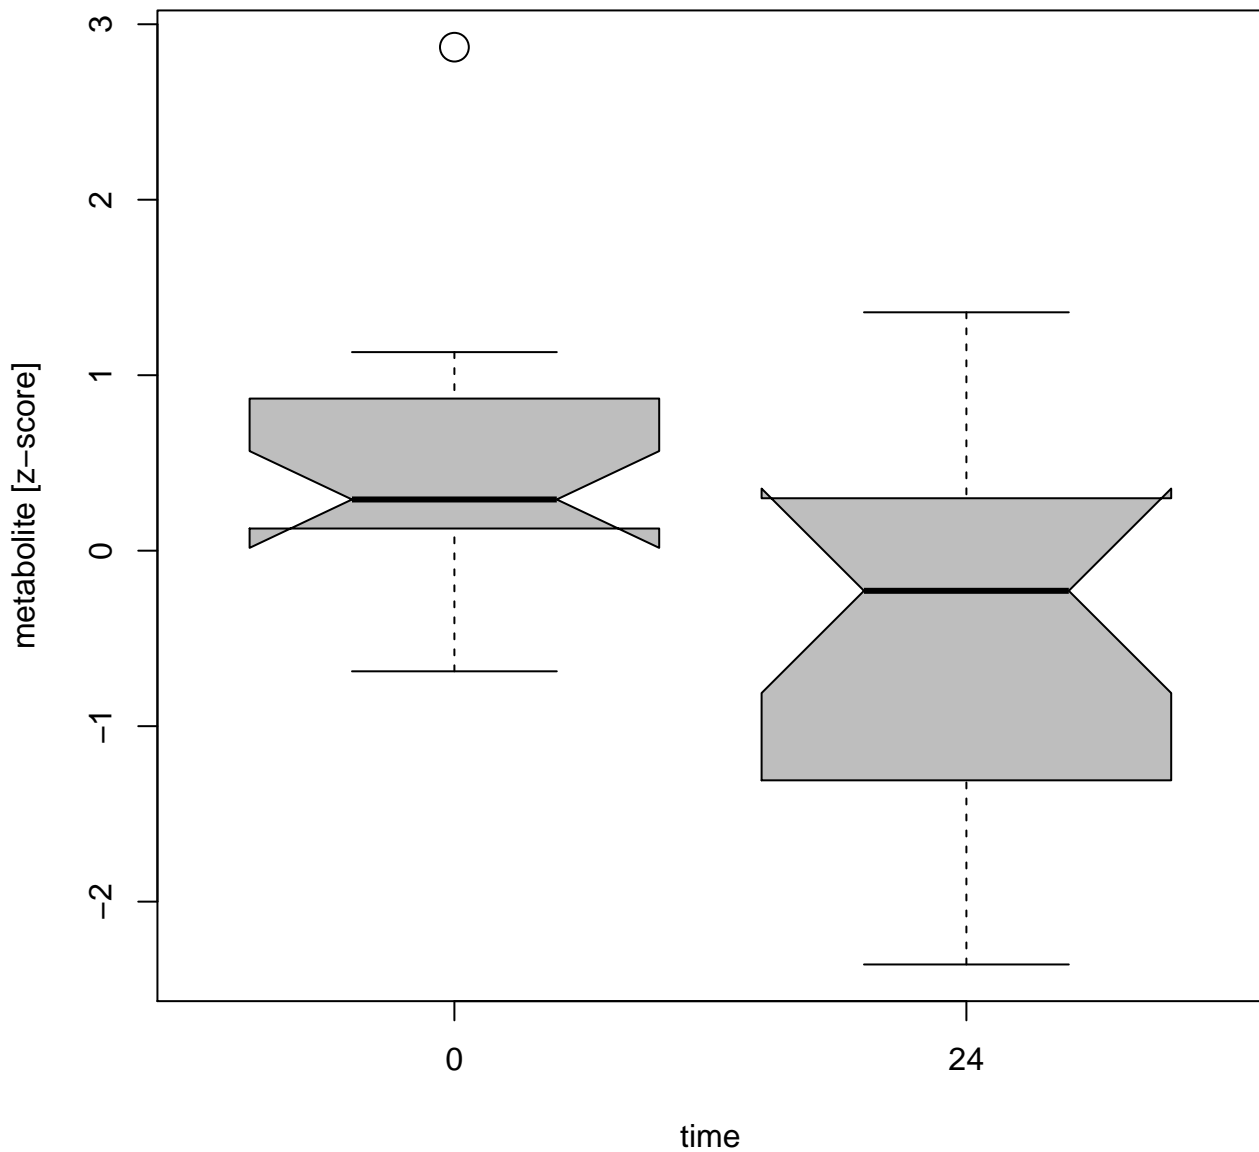

uridine monophosphate (5' or 3')

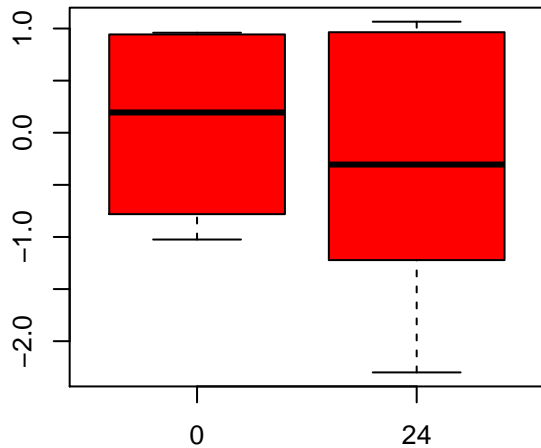

HCT116

uridine monophosphate (5' or 3')

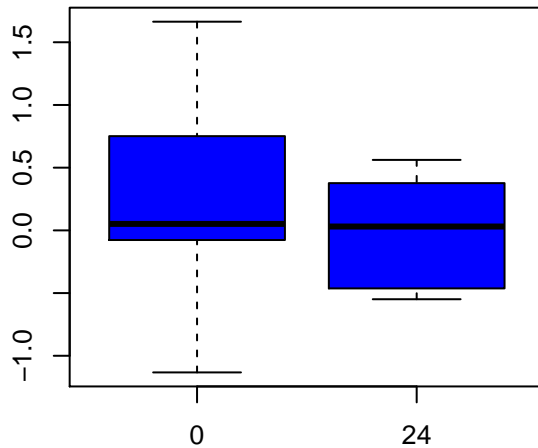

OVCAR

uridine monophosphate (5' or 3')

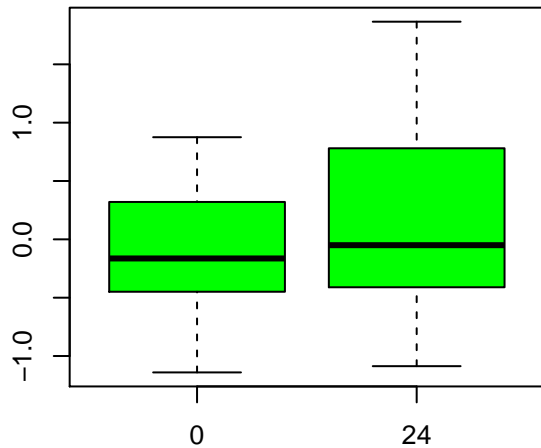

HCT15

uridine monophosphate (5' or 3')

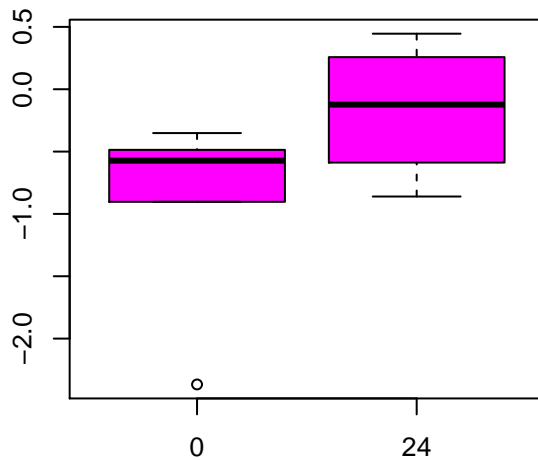

SKOV3



# uridine monophosphate (5' or 3')

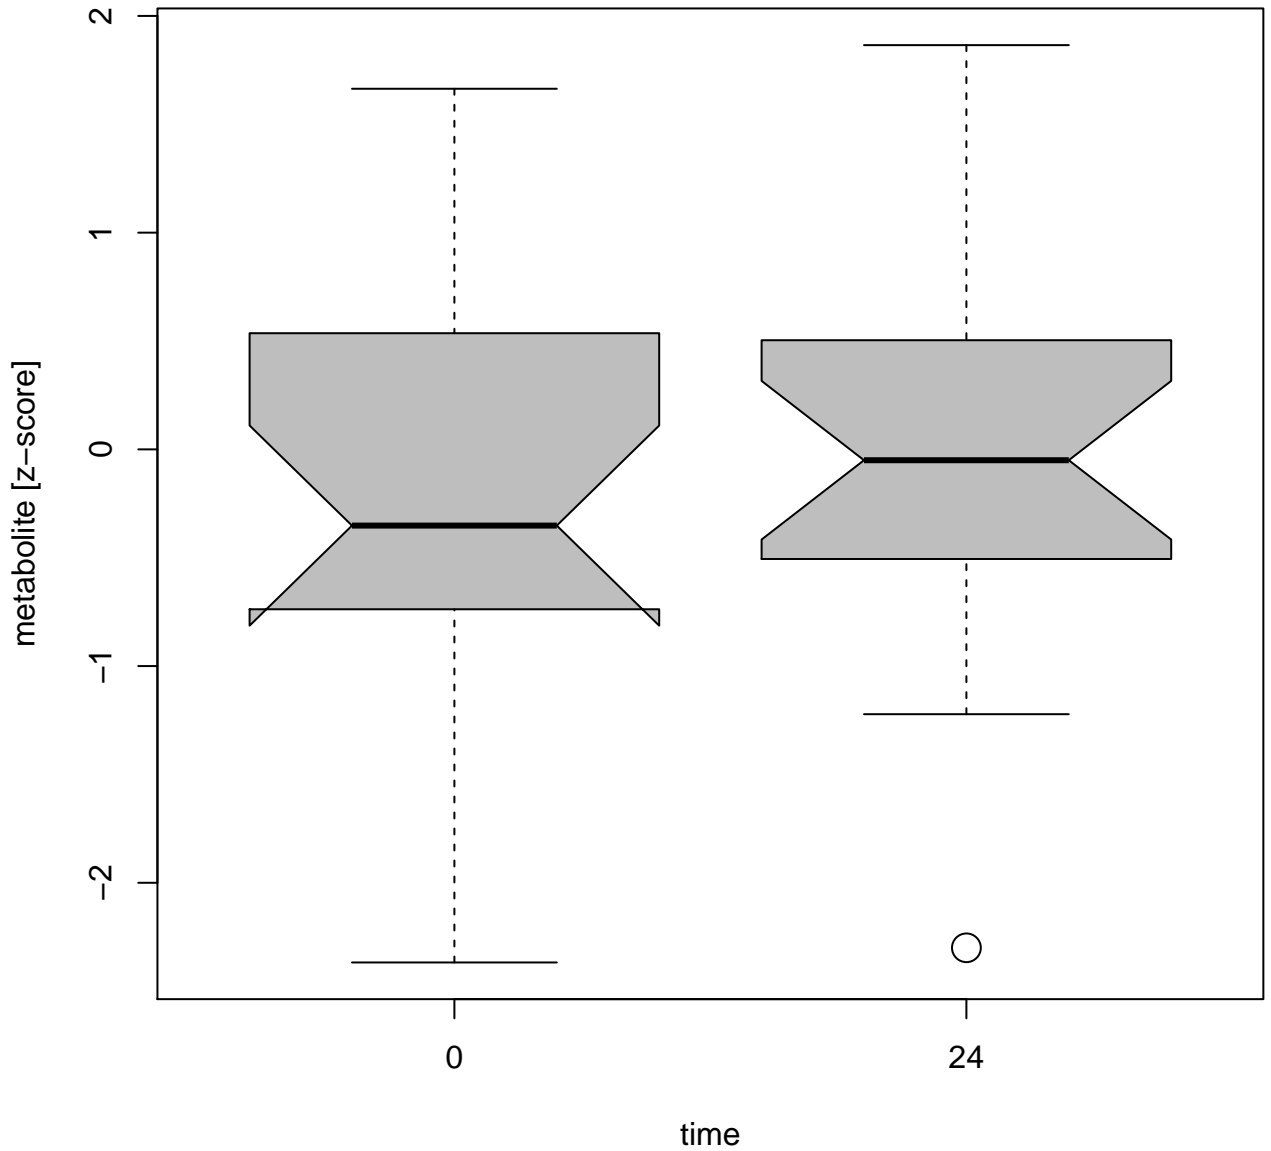

**valine**

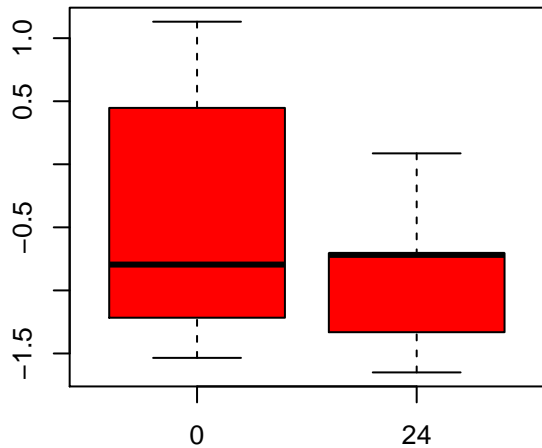

**valine**

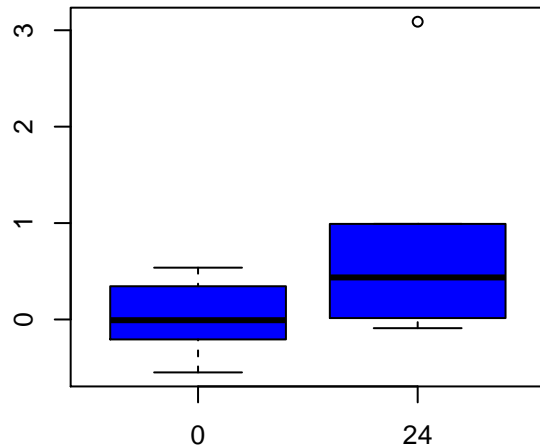

**HCT116**

**OVCAR**

**valine**

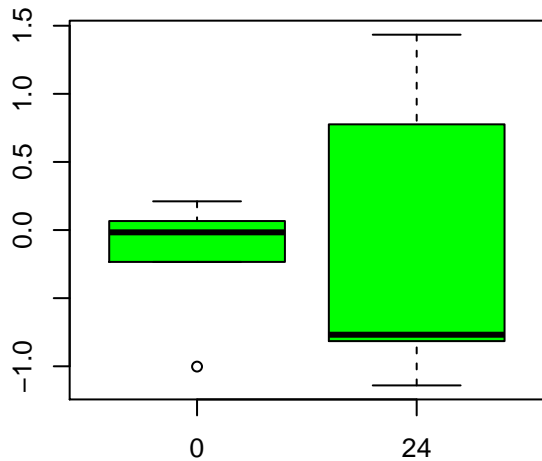

**valine**

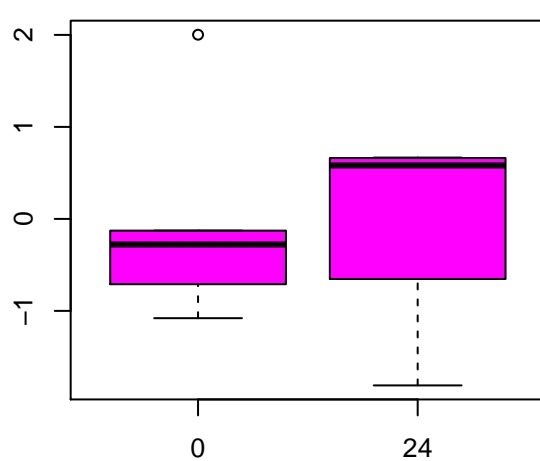

**HCT15**

**SKOV3**

# valine

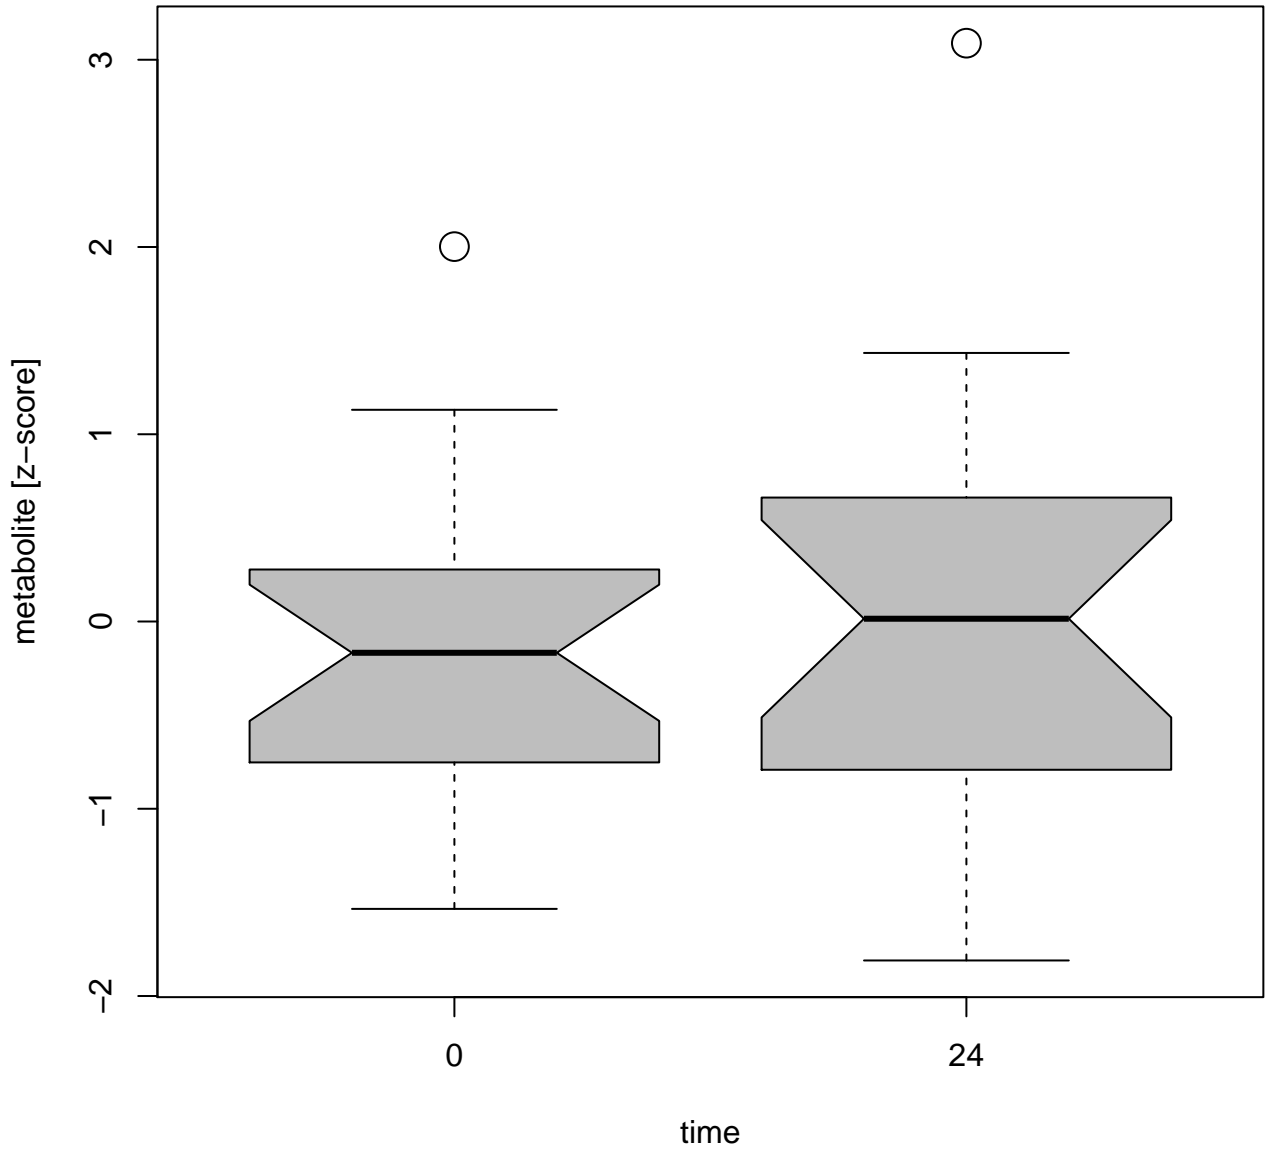

**valylaspartate**

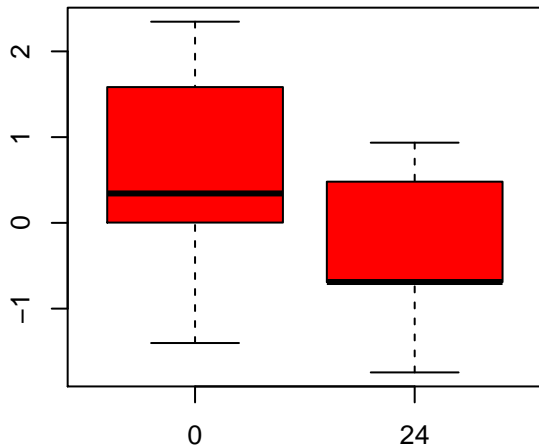

HCT116

**valylaspartate**

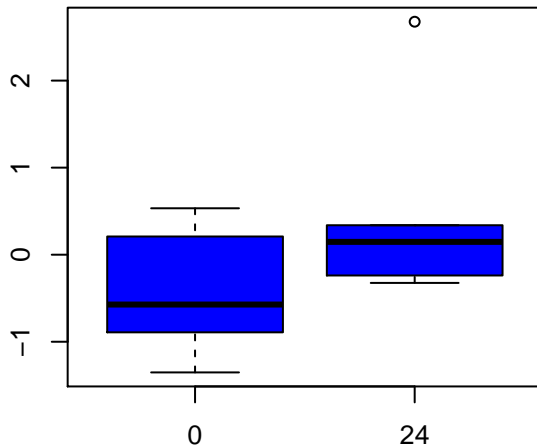

OVCAR

**valylaspartate**

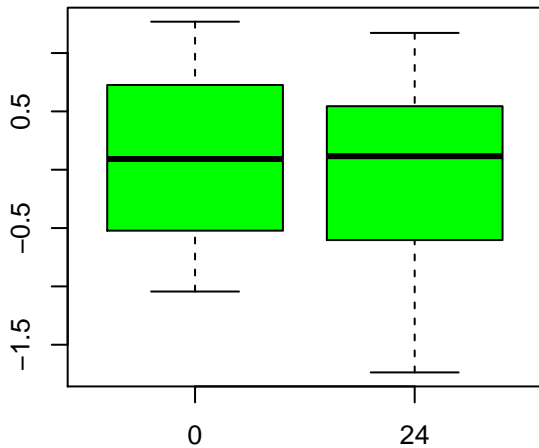

HCT15

**valylaspartate**

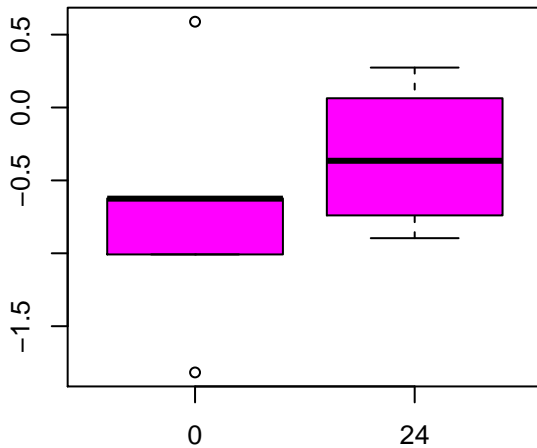

SKOV3

# valylaspartate

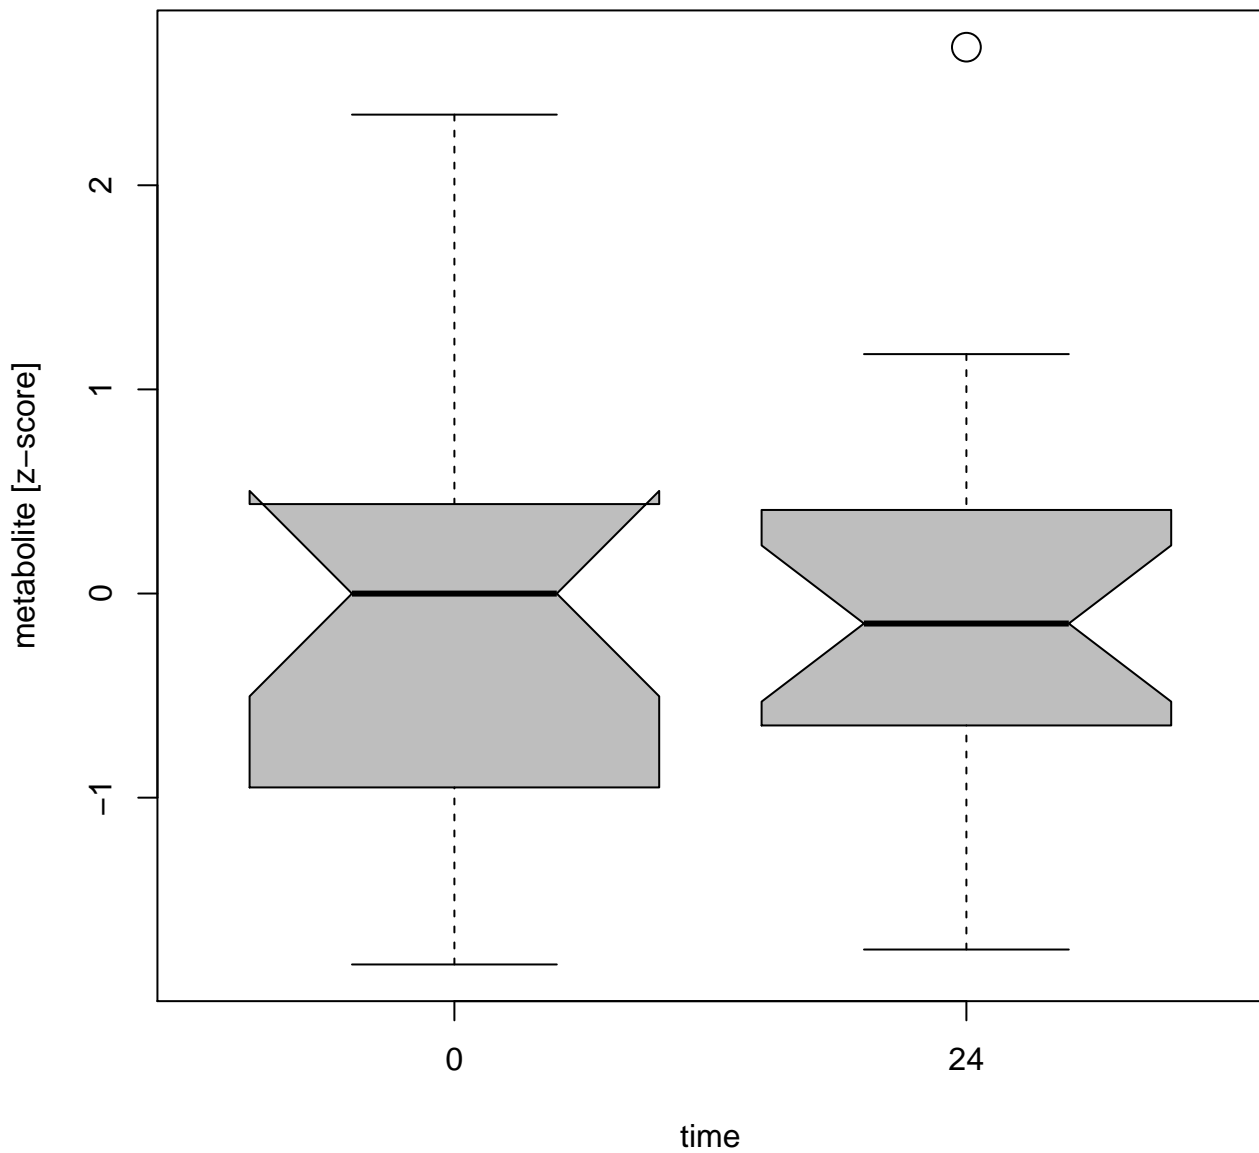

**valylleucine**

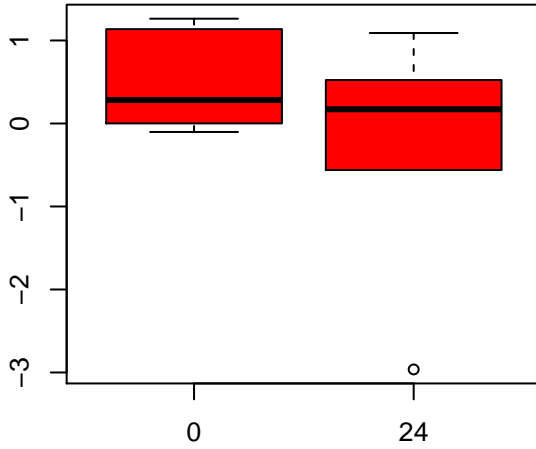

HCT116

**valylleucine**

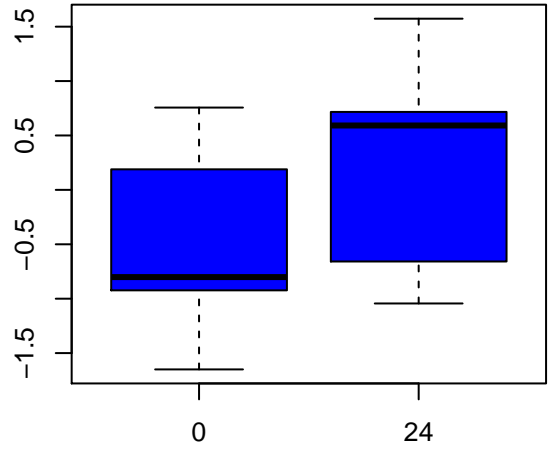

OVCAR

**valylleucine**

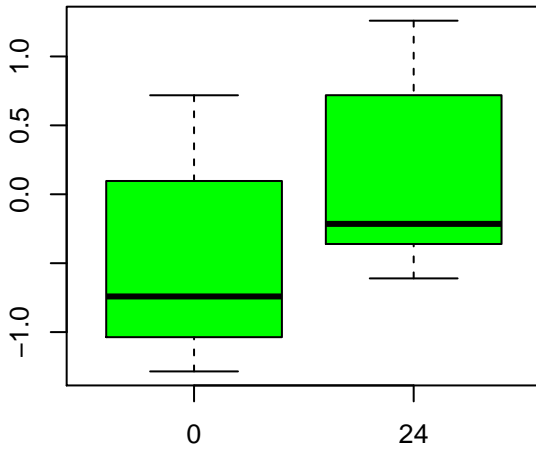

HCT15

**valylleucine**

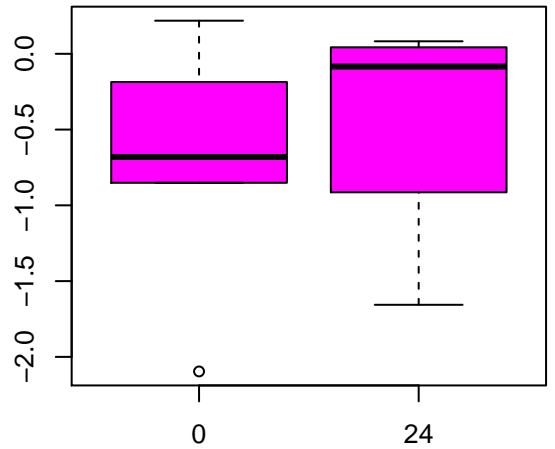

SKOV3

# valylleucine

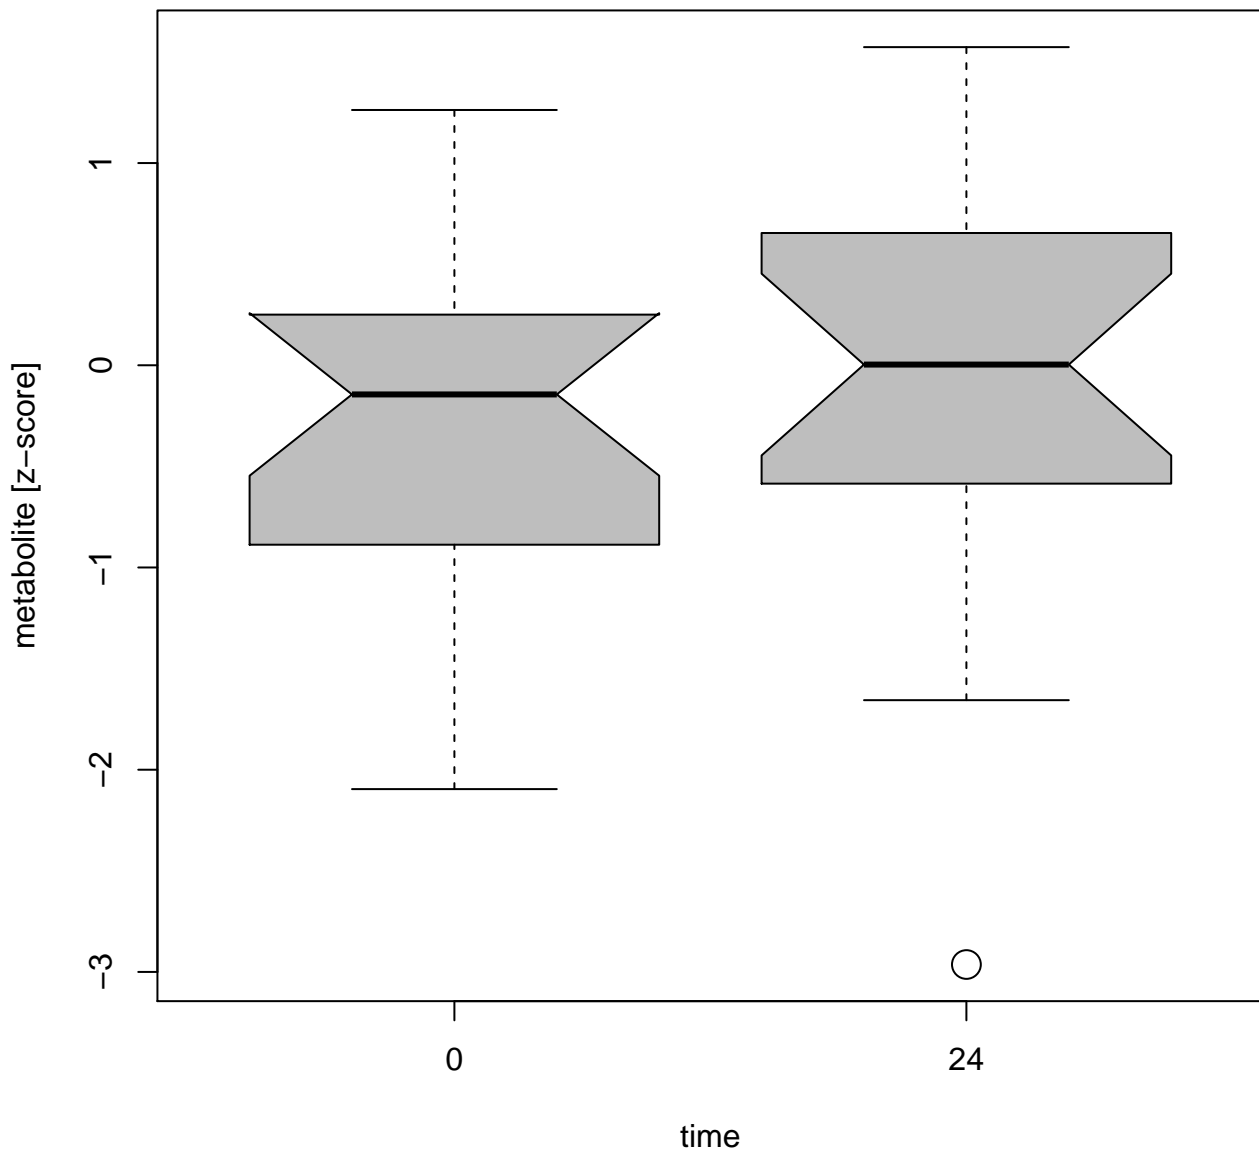

**xanthine**

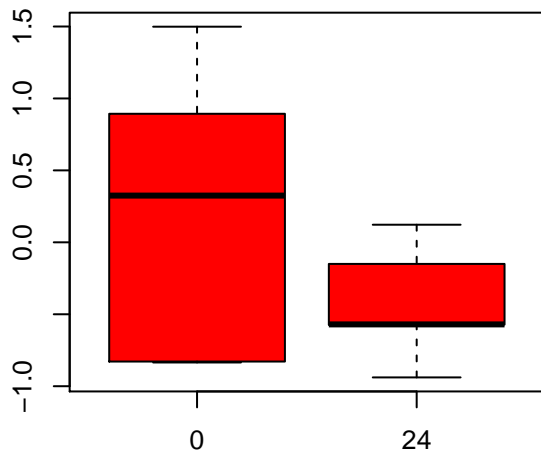

HCT116

**xanthine**

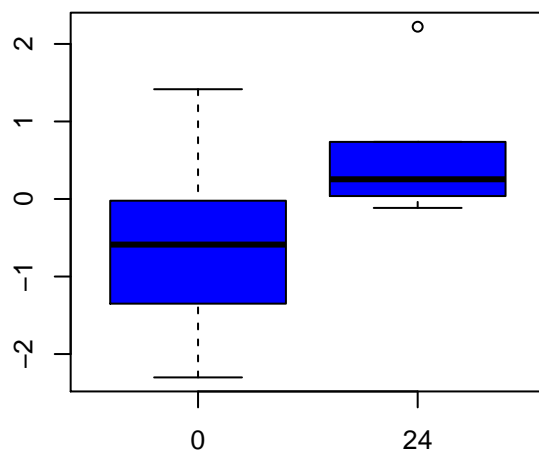

OVCAR

**xanthine**

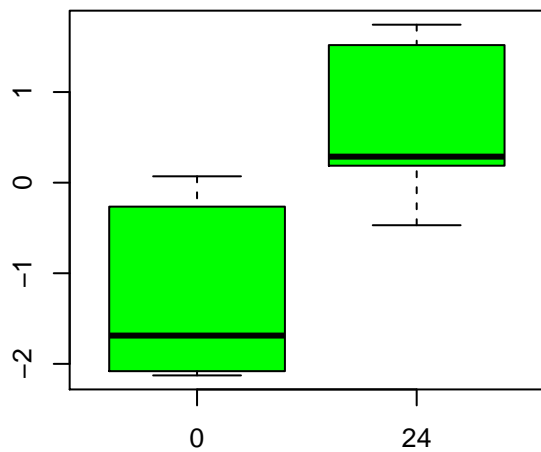

HCT15

**xanthine**

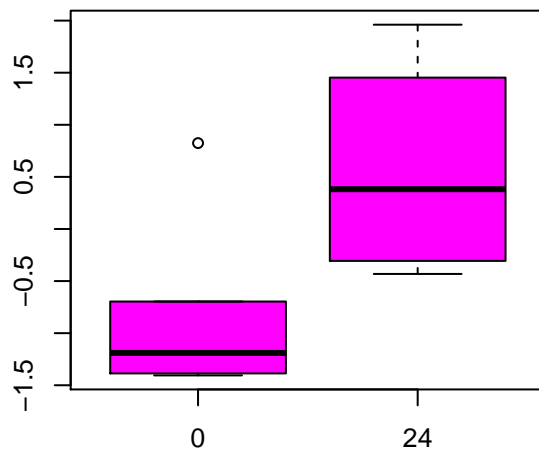

SKOV3



# xanthine

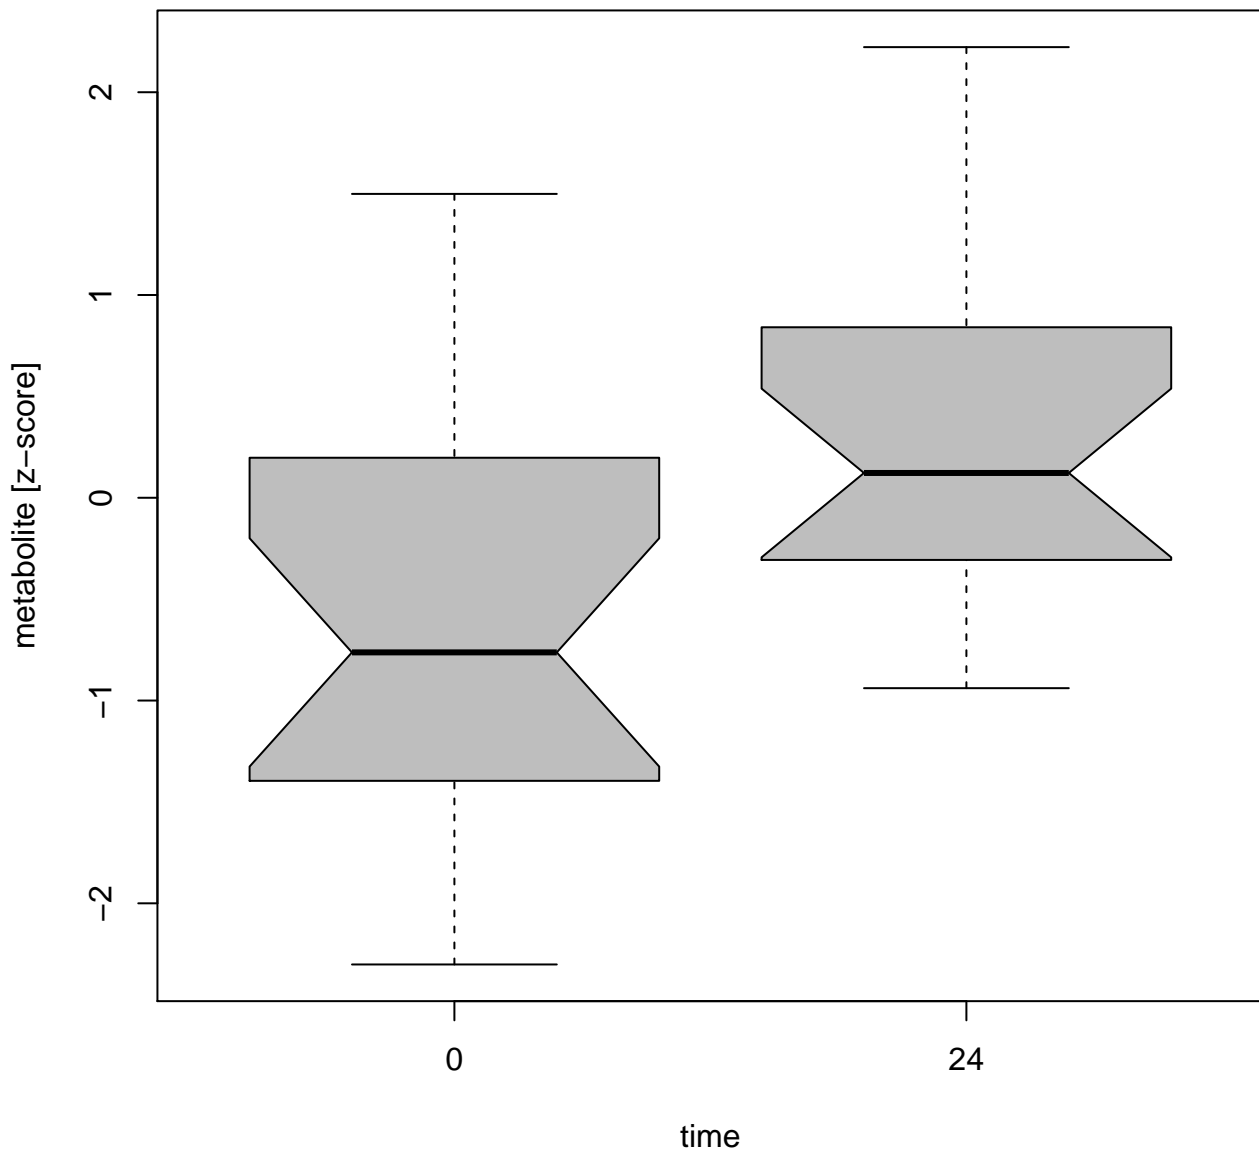

**X - 11304**

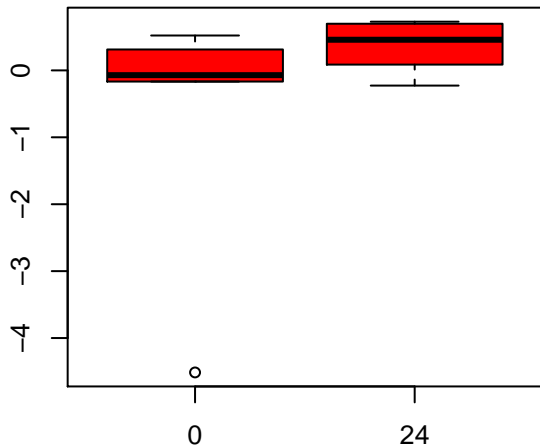

**X - 11304**

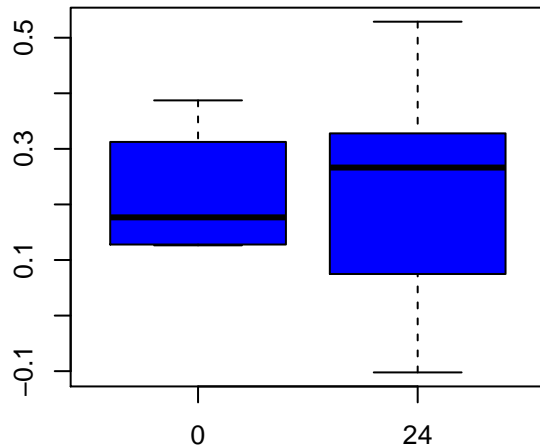

**HCT116**

**X - 11304**

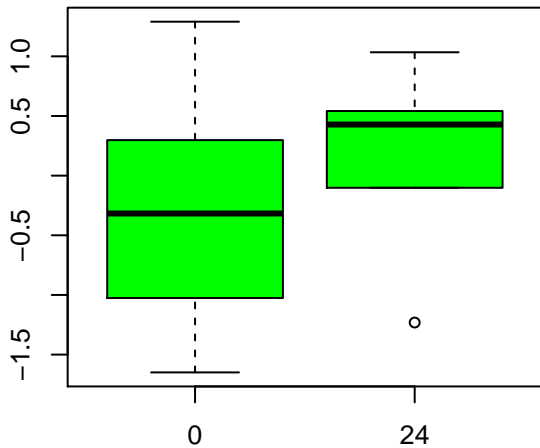

**OVCAR**

**X - 11304**

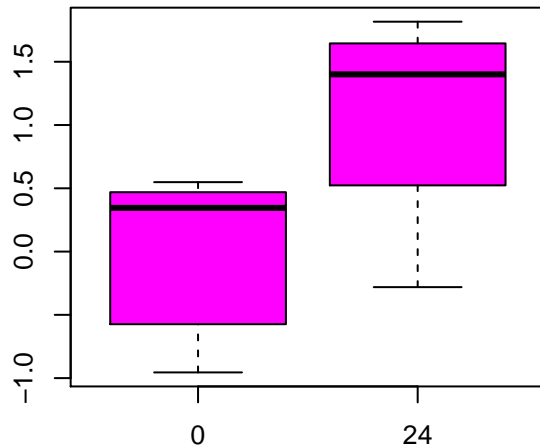

**HCT15**

**SKOV3**

# X - 11304

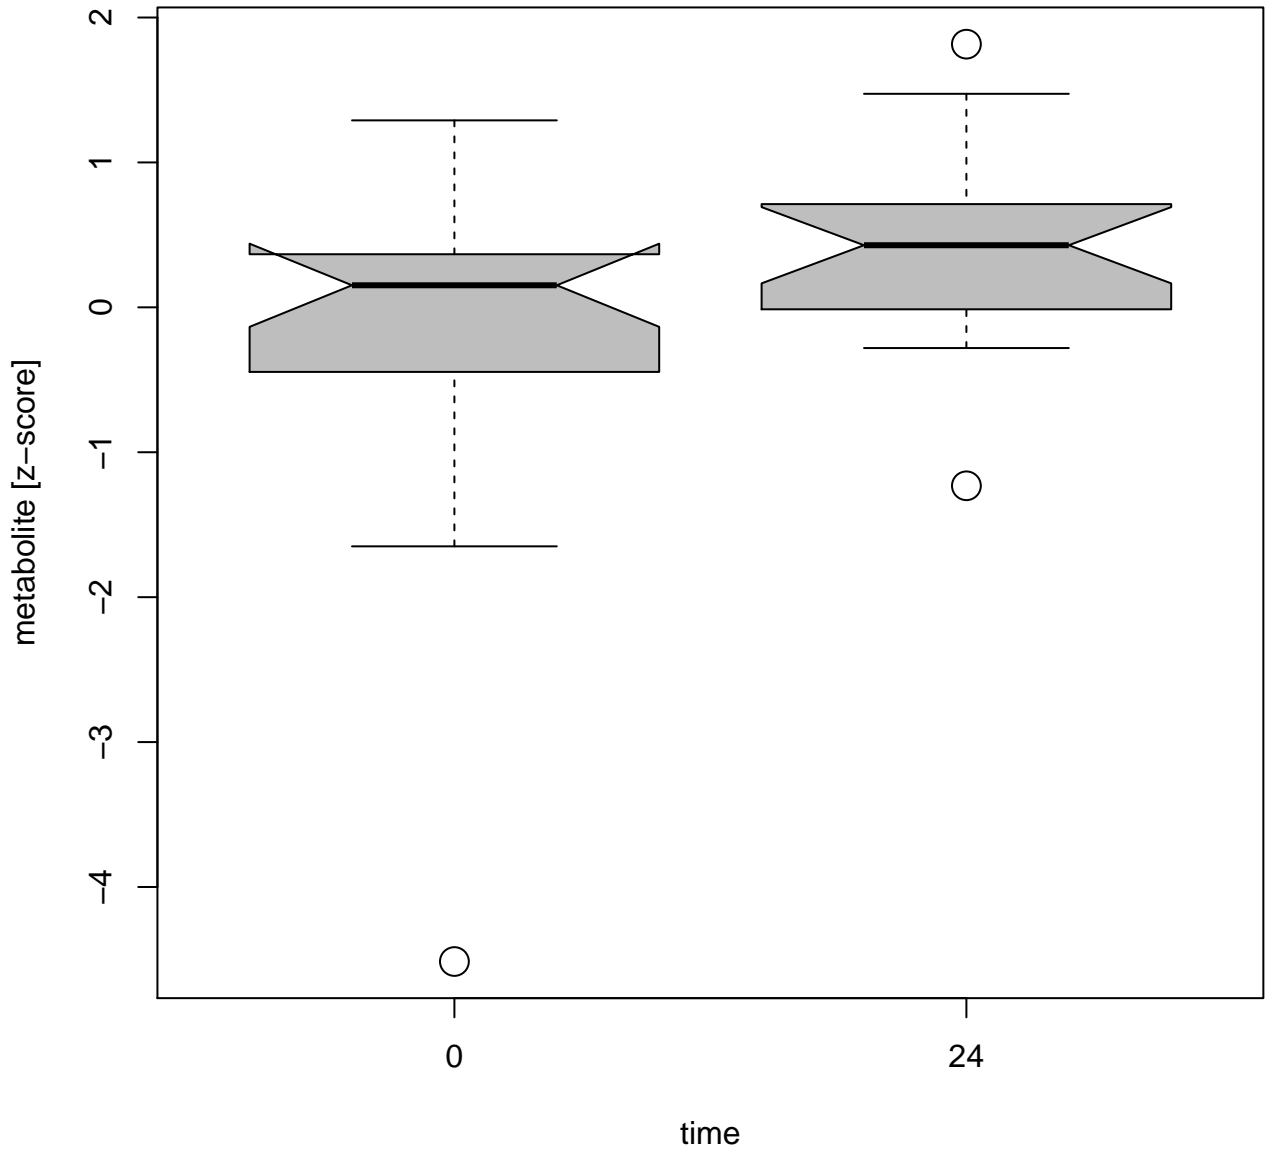

**X - 11583**

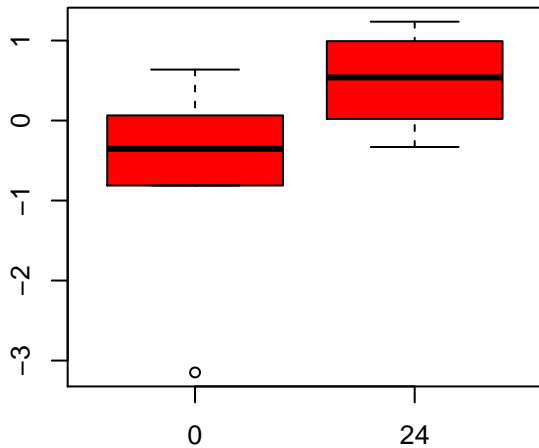

HCT116

**X - 11583**

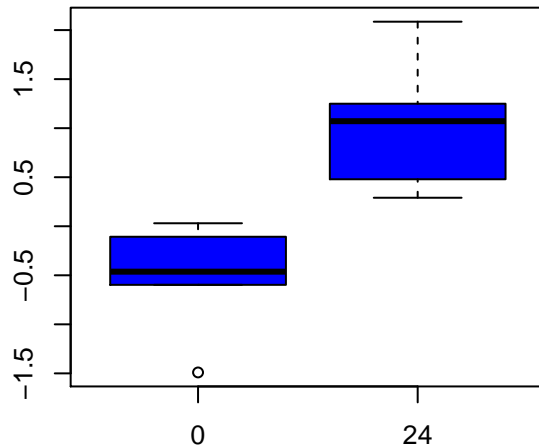

OVCAR

**X - 11583**

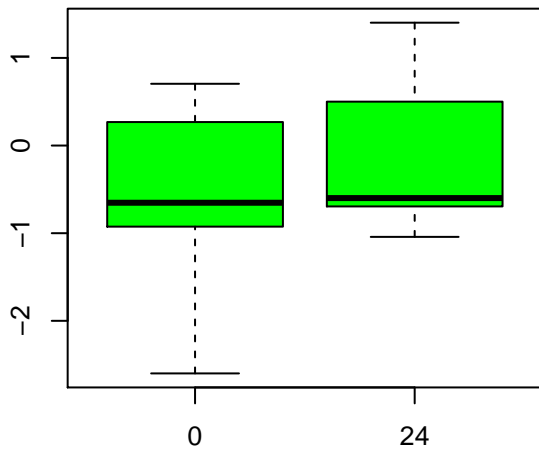

HCT15

**X - 11583**

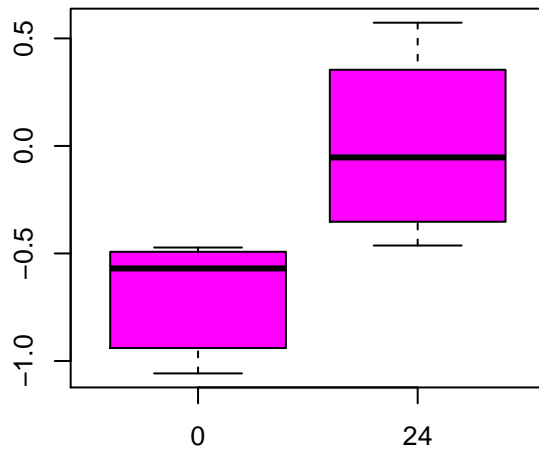

SKOV3

# X - 11583

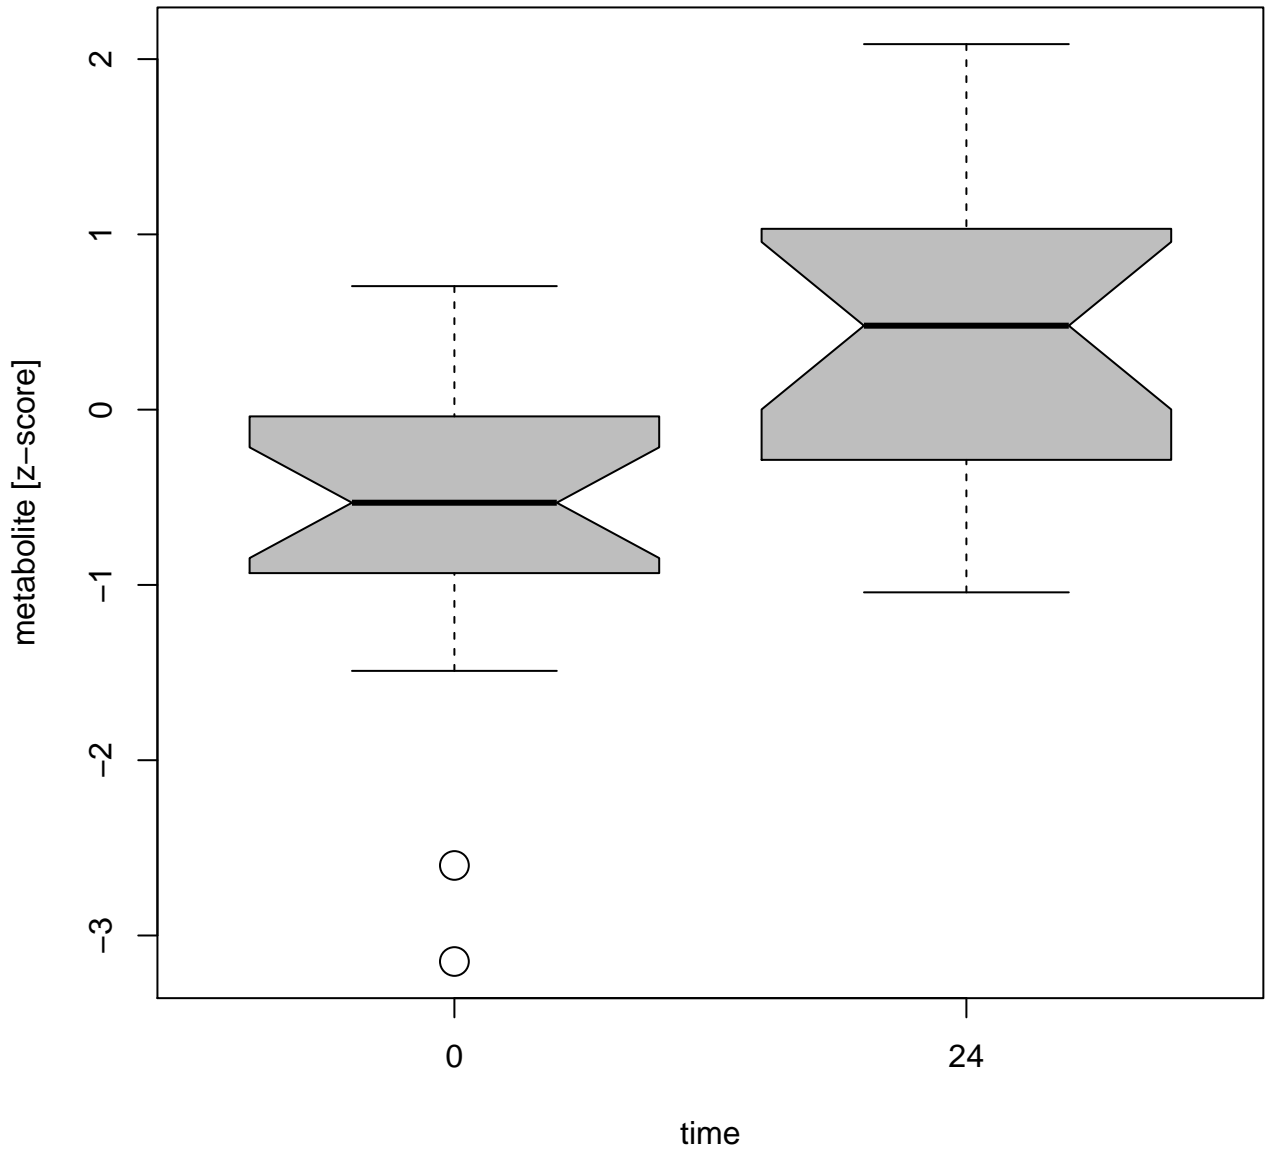

**X - 11677**

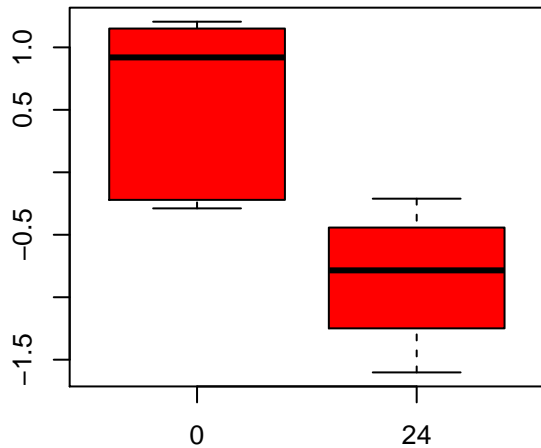

HCT116

**X - 11677**

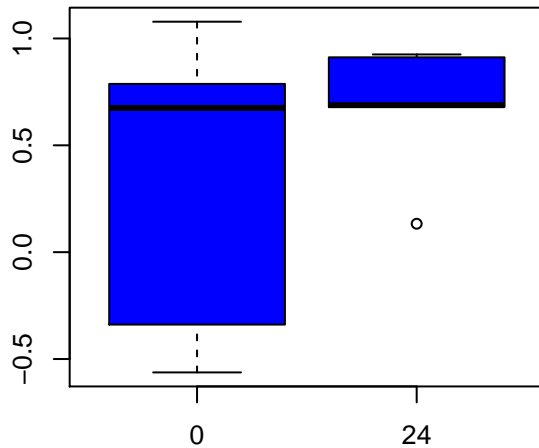

OVCAR

**X - 11677**

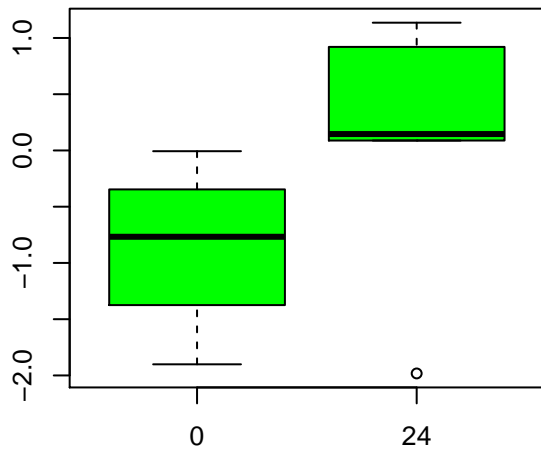

HCT15

**X - 11677**

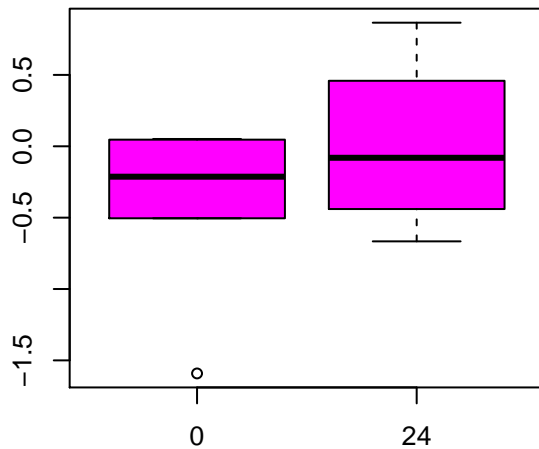

SKOV3

# X - 11677

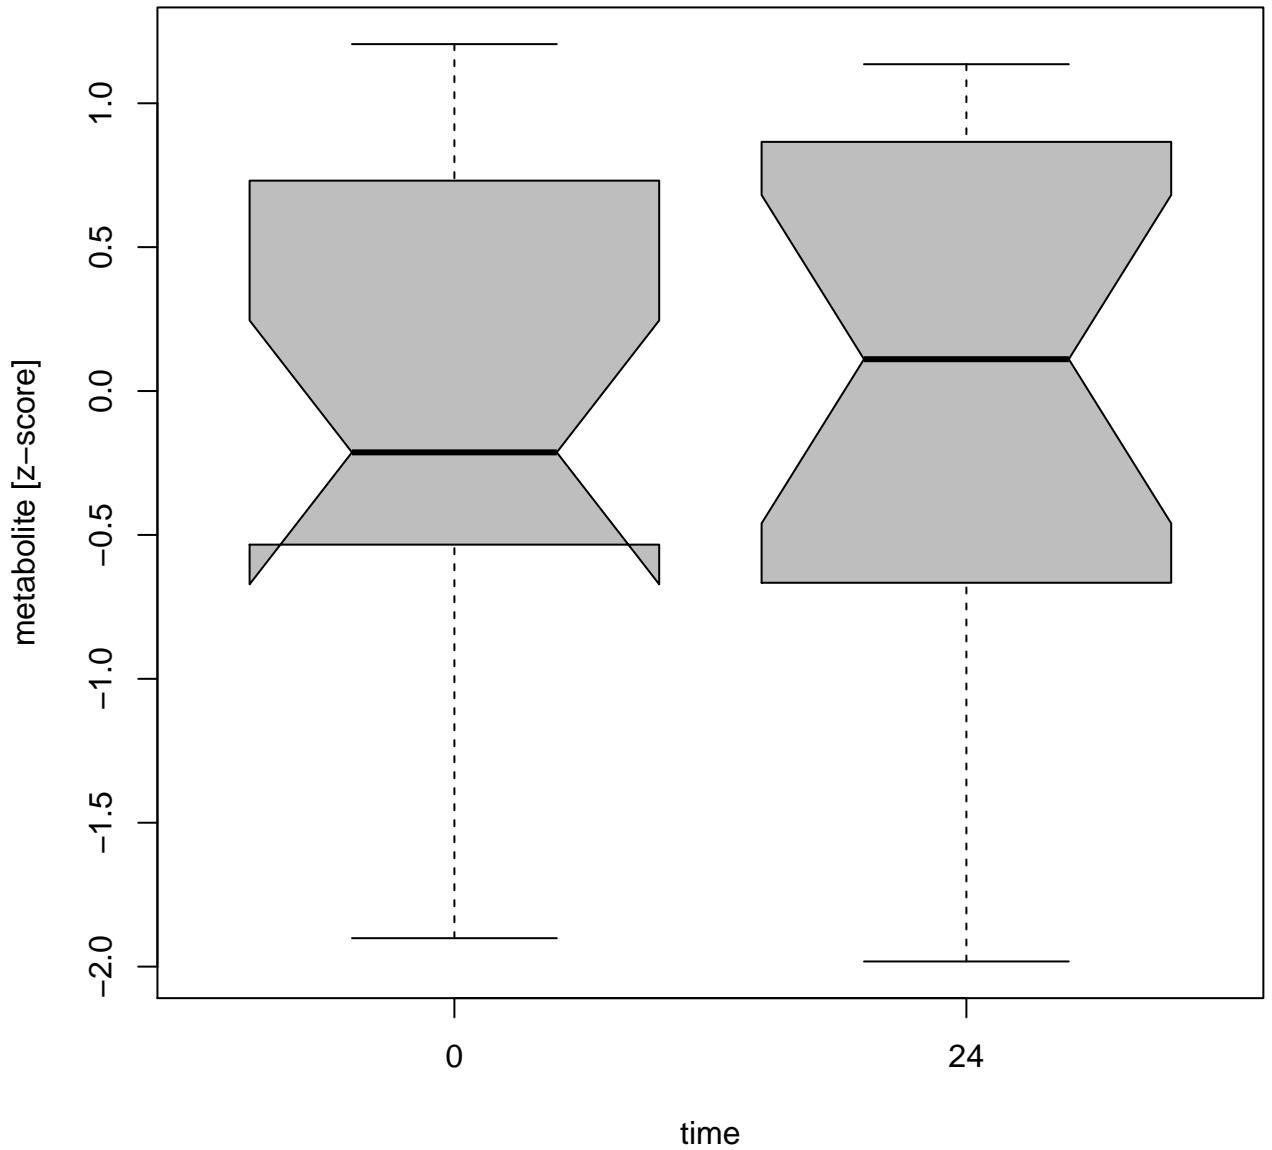

**X - 12792**

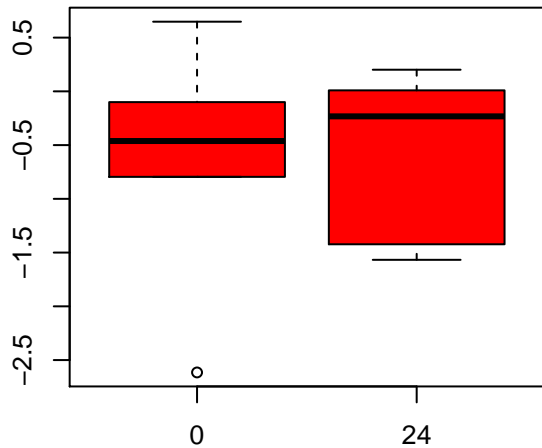

HCT116

**X - 12792**

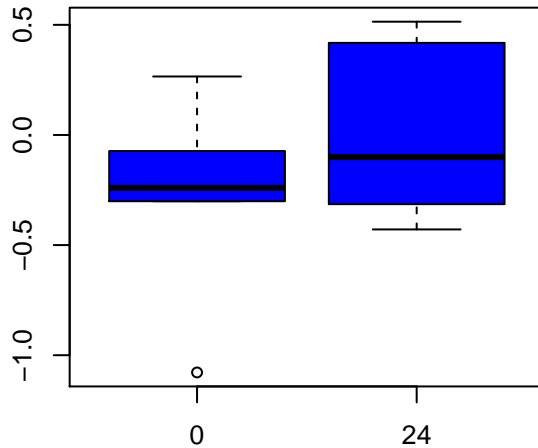

OVCAR

**X - 12792**

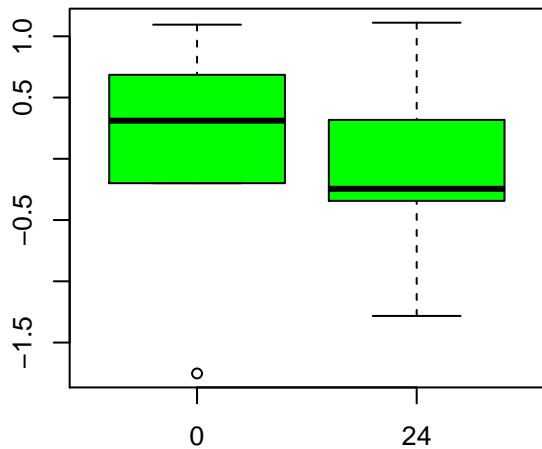

HCT15

**X - 12792**

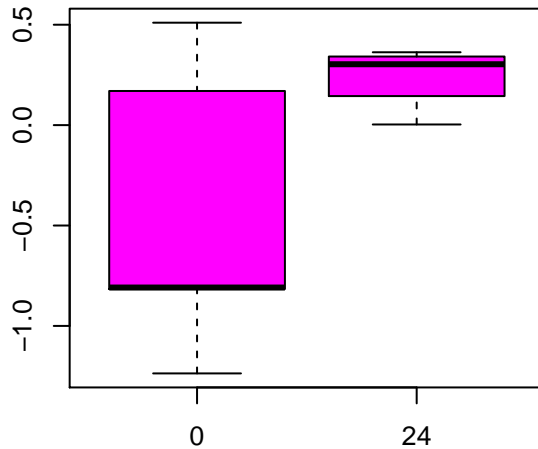

SKOV3



# X - 12792

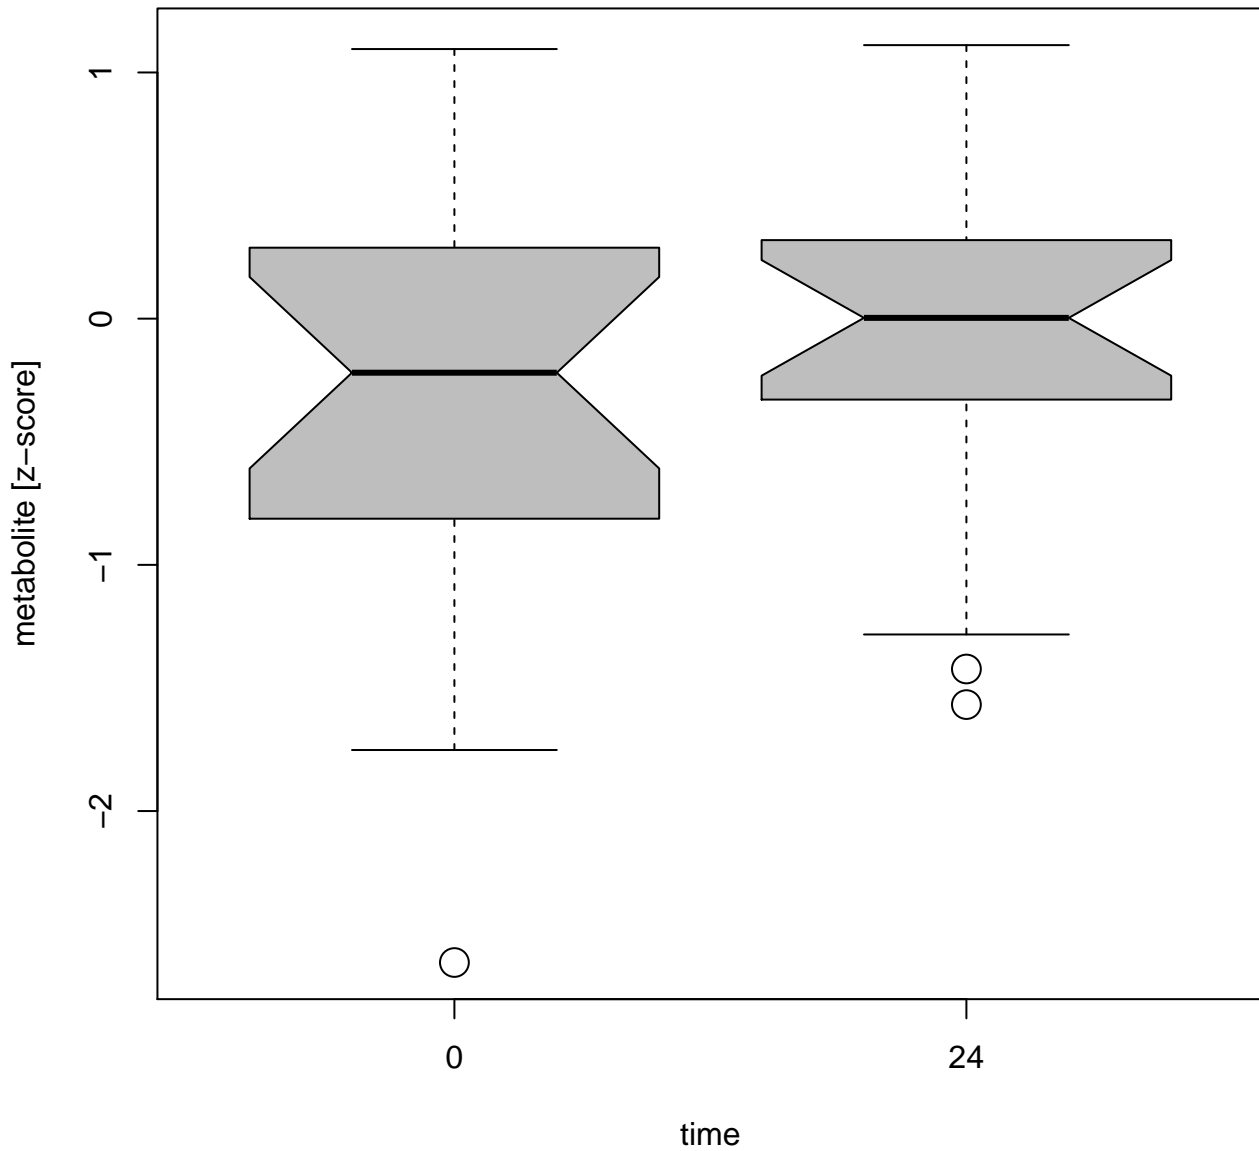

**X - 13230**

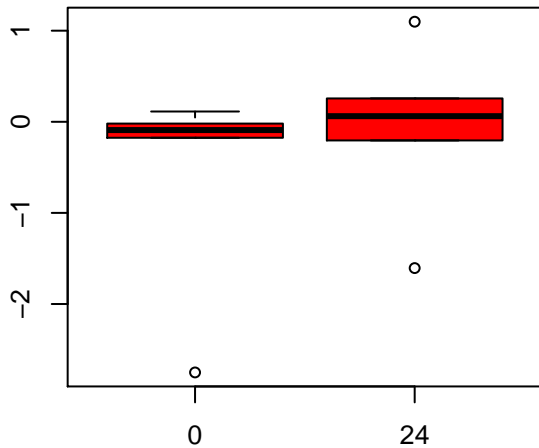

HCT116

**X - 13230**

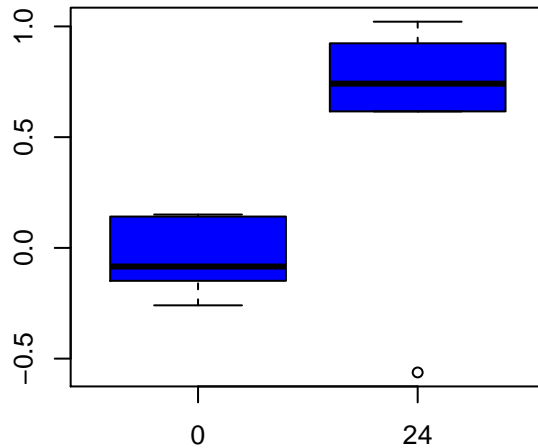

OVCAR

**X - 13230**

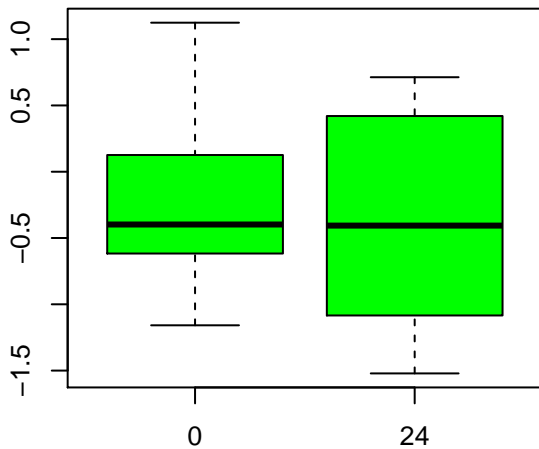

HCT15

**X - 13230**

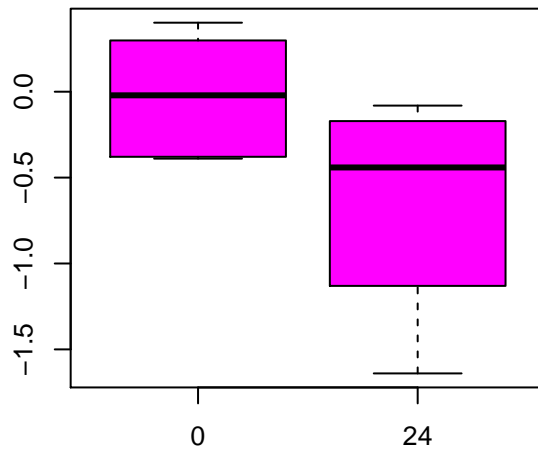

SKOV3

# X - 13230

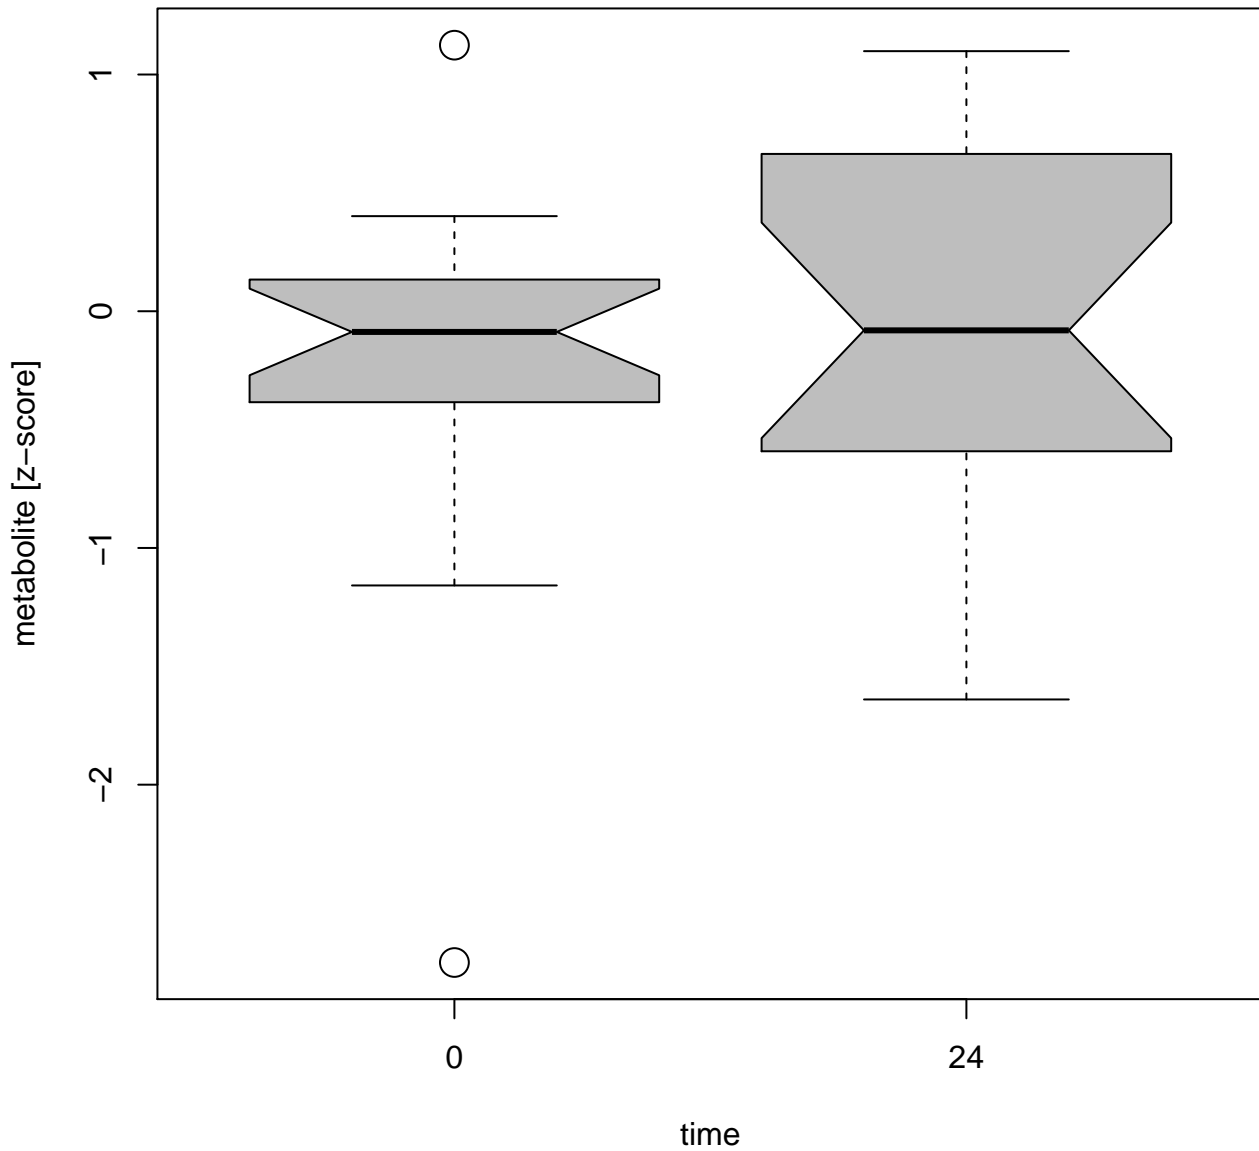

**X - 13396**

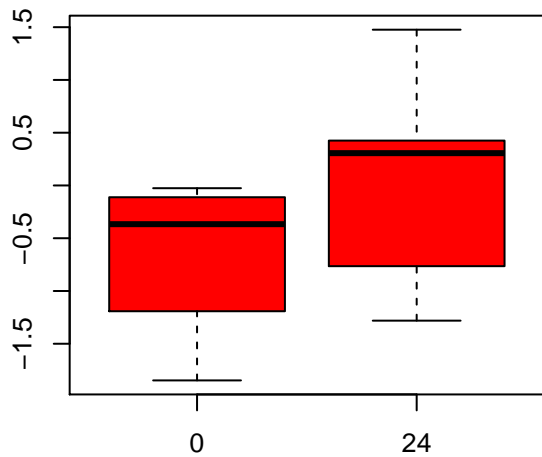

HCT116

**X - 13396**

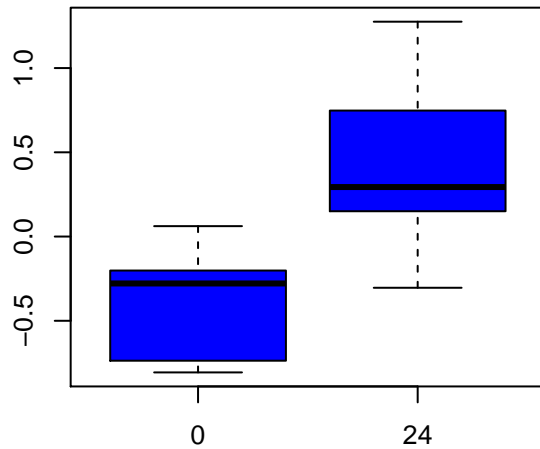

OVCAR

**X - 13396**

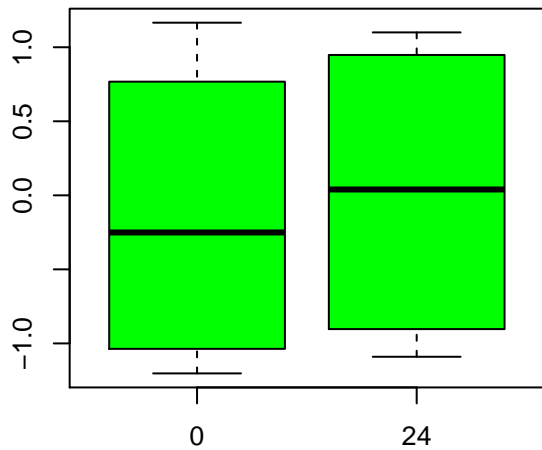

HCT15

**X - 13396**

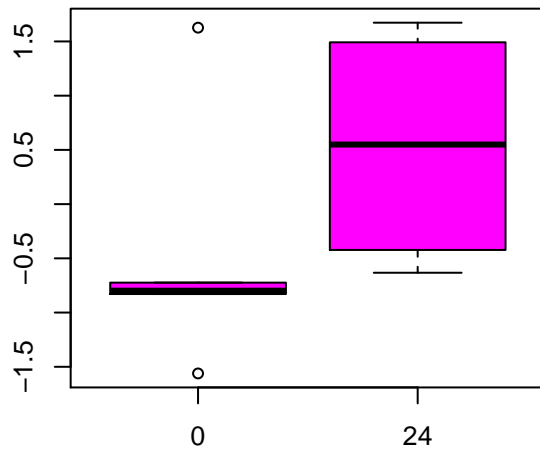

SKOV3

# X - 13396

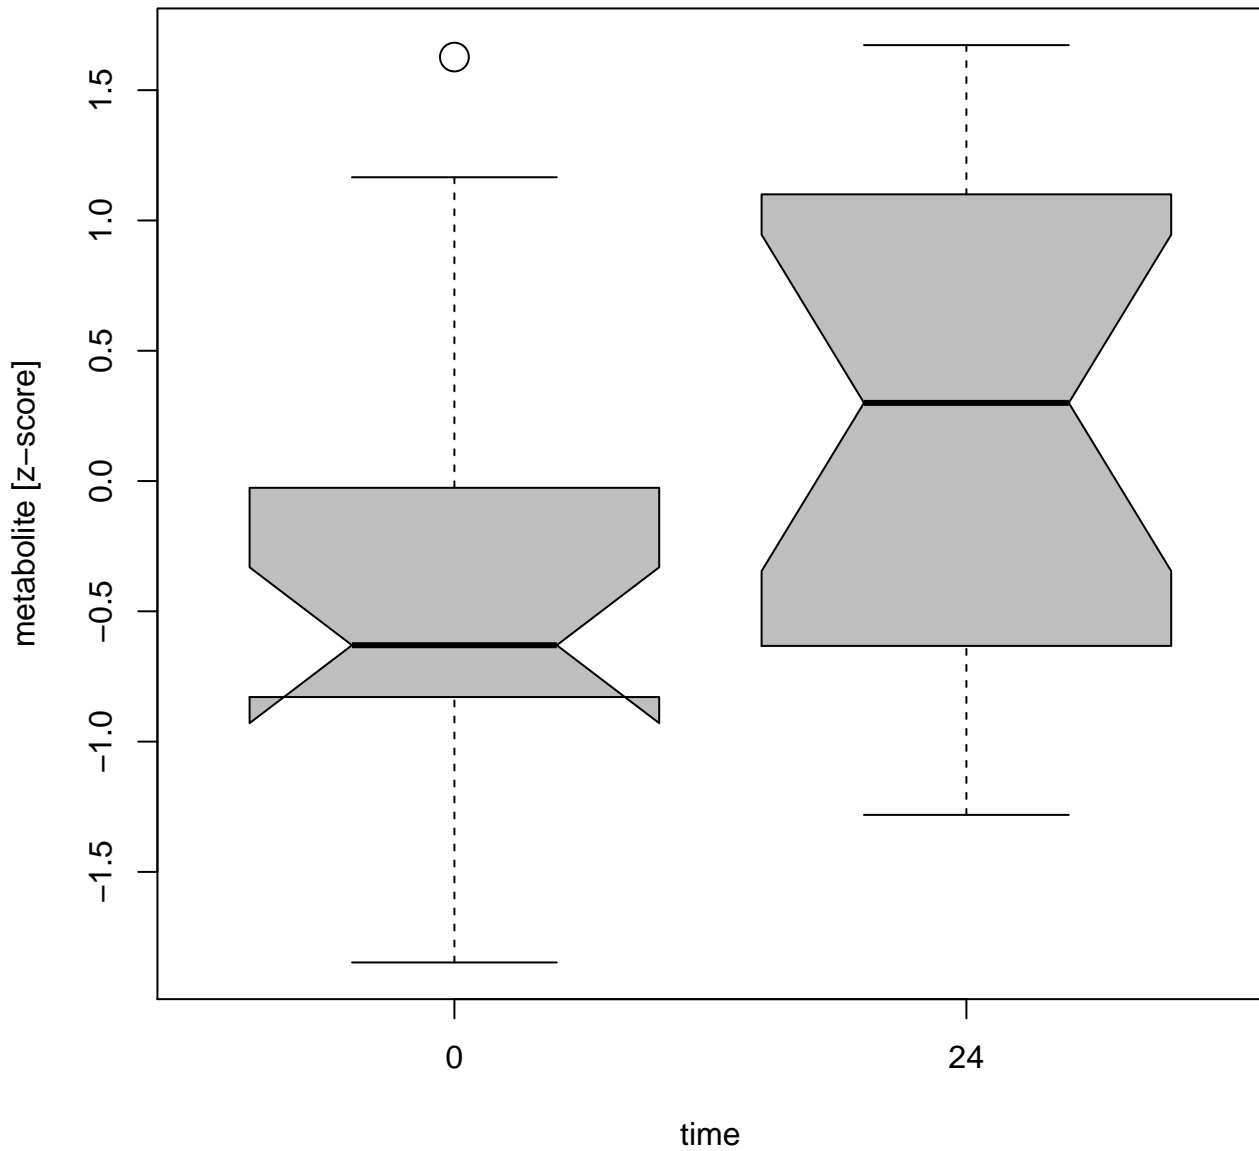

**X - 14568**

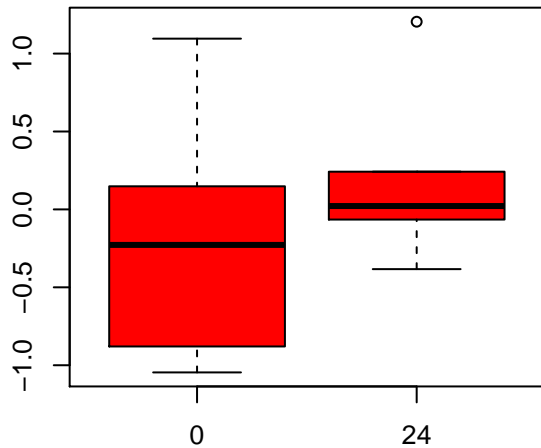

HCT116

**X - 14568**

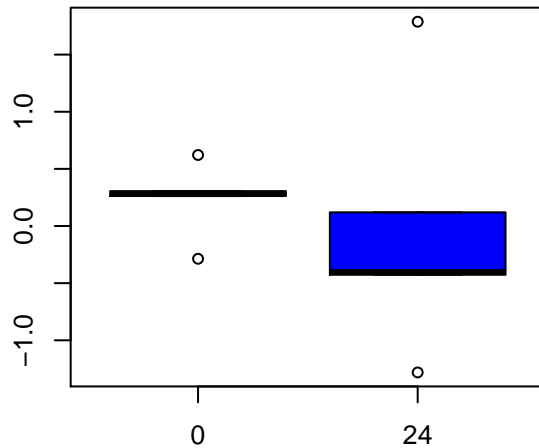

OVCAR

**X - 14568**

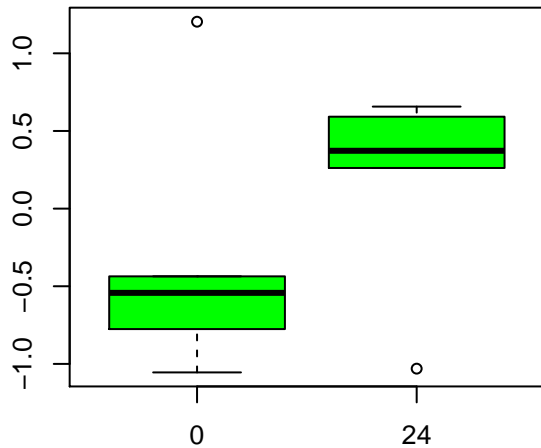

HCT15

**X - 14568**

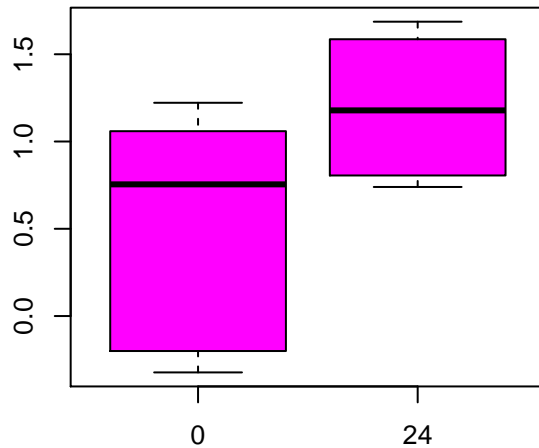

SKOV3

# X - 14568

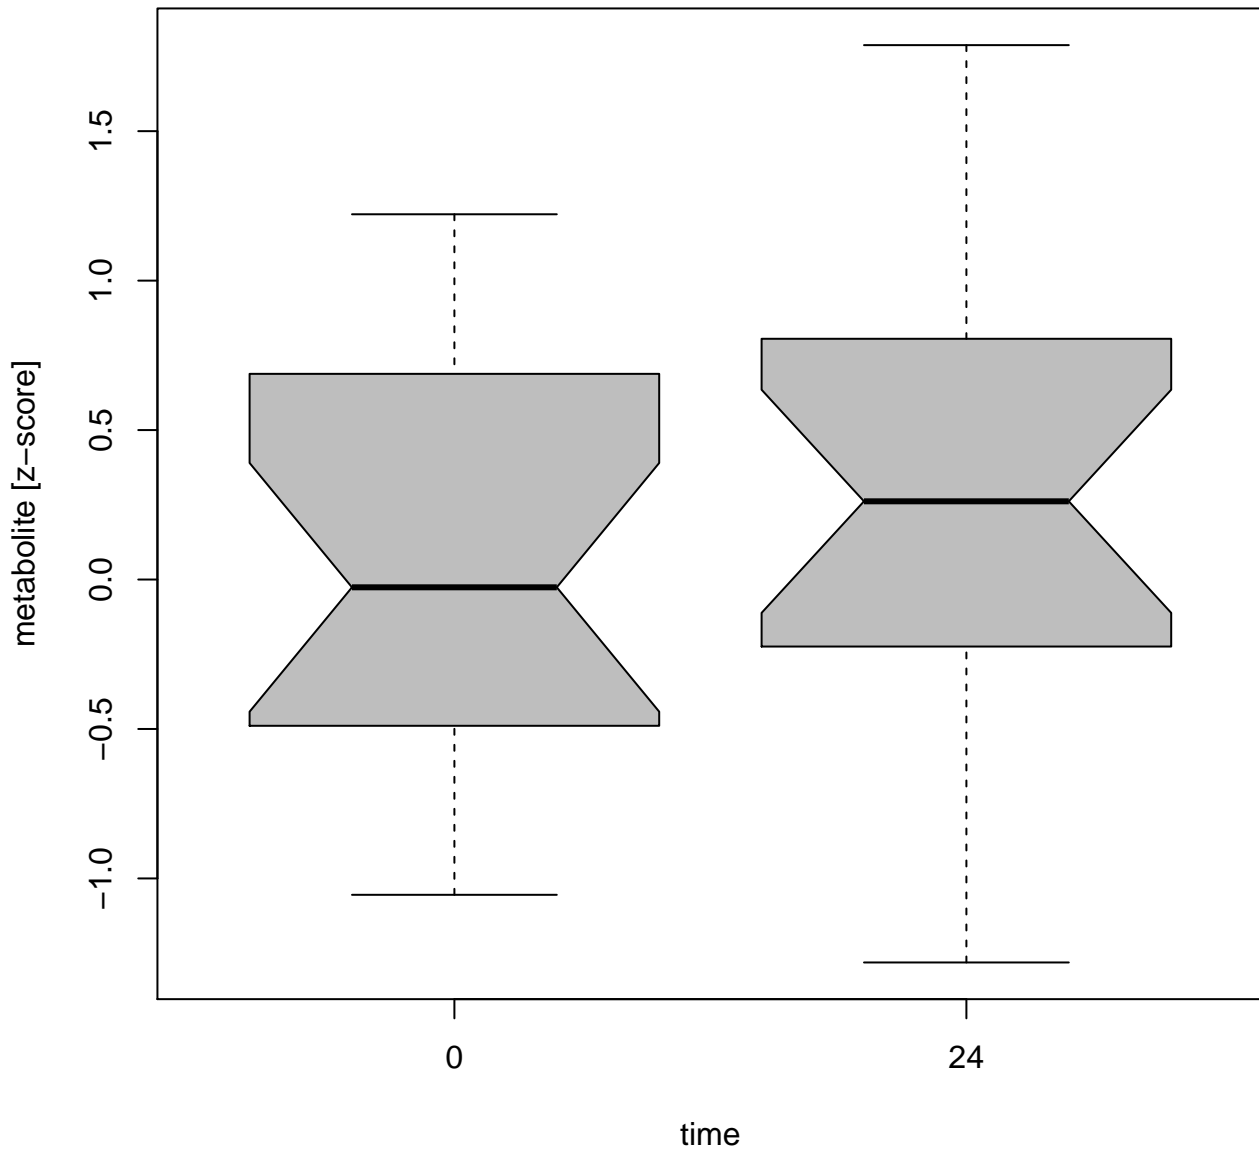

**X - 14577**

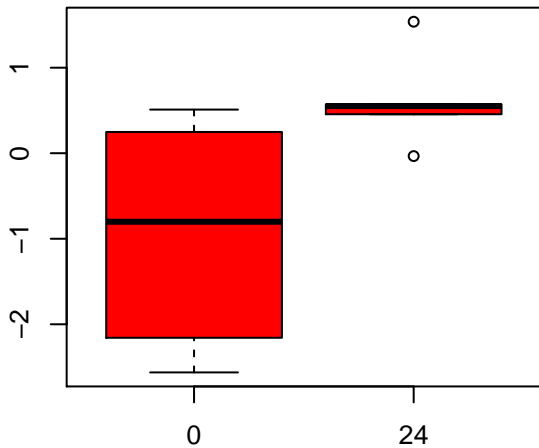

HCT116

**X - 14577**

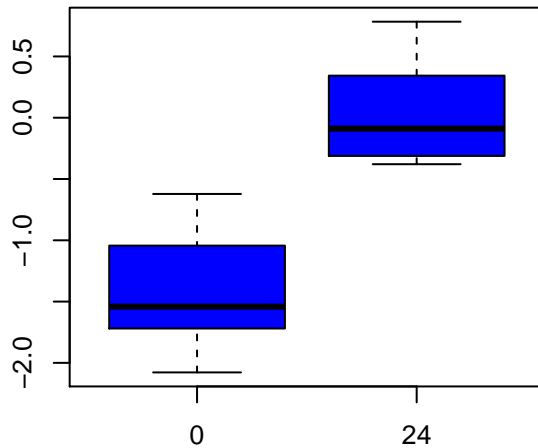

OVCAR

**X - 14577**

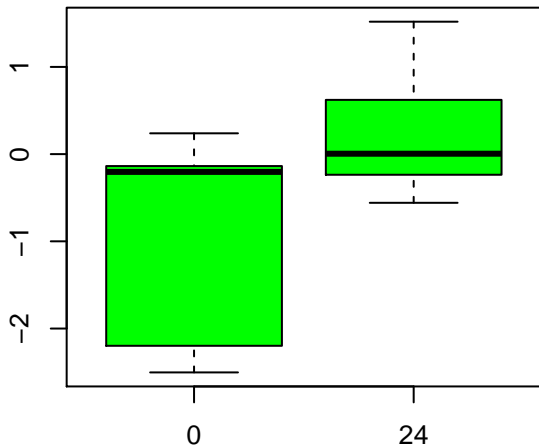

HCT15

**X - 14577**

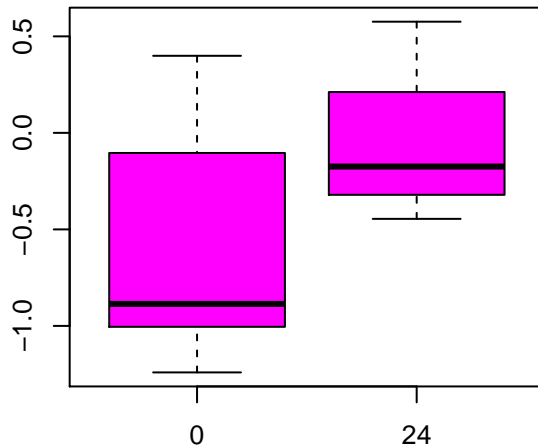

SKOV3



# X - 14577

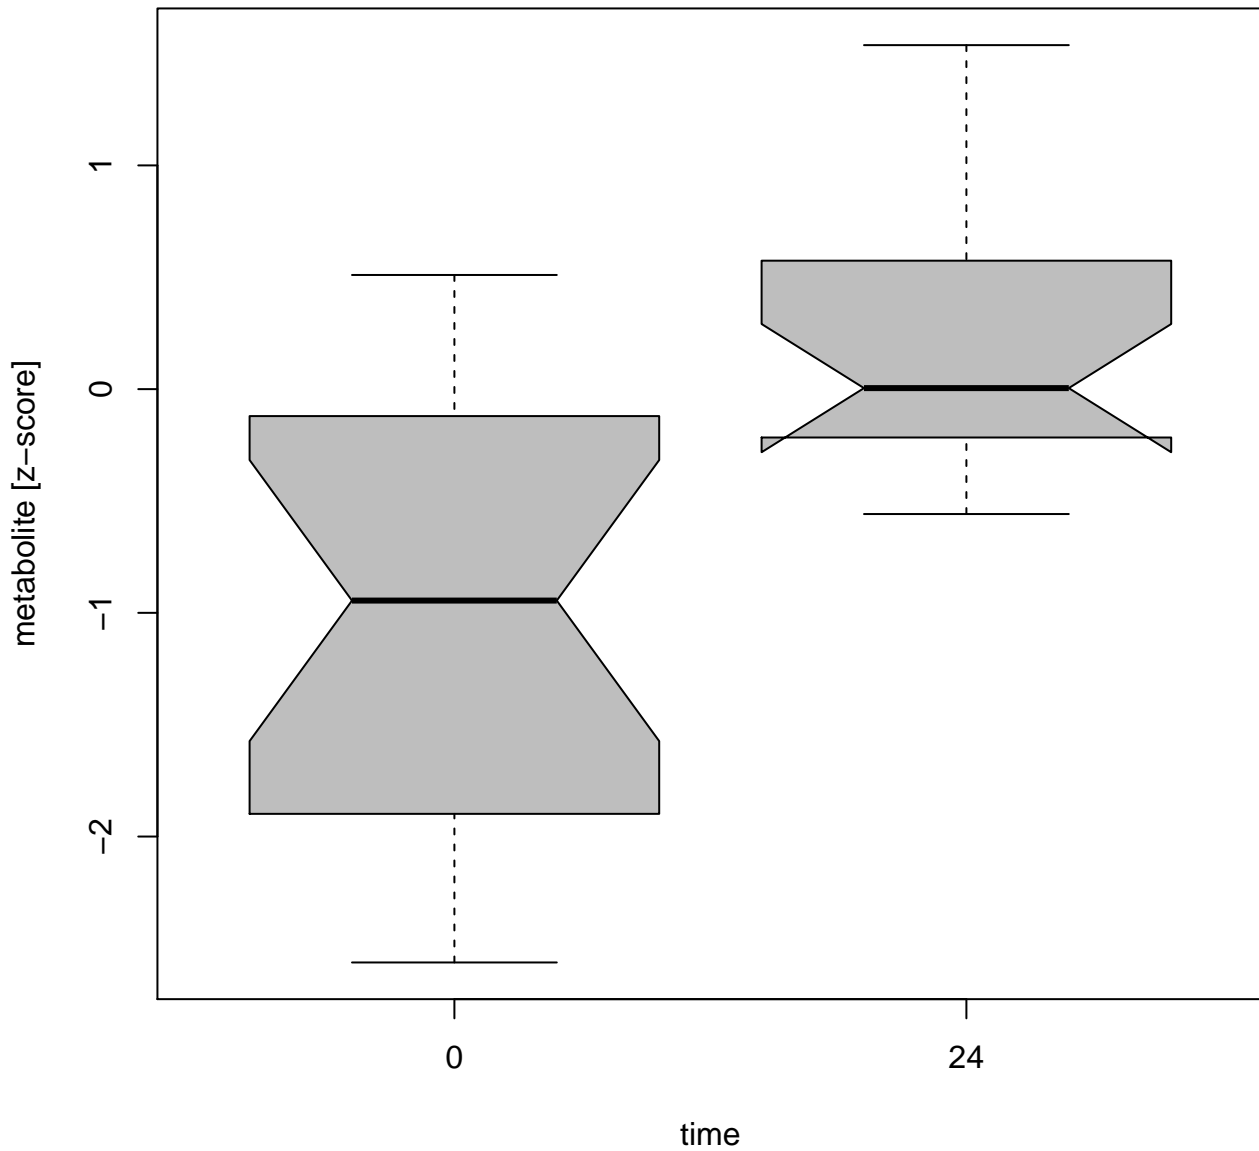

**X - 14588**

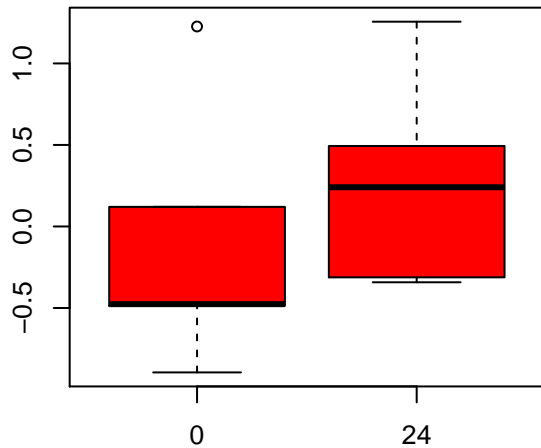

HCT116

**X - 14588**

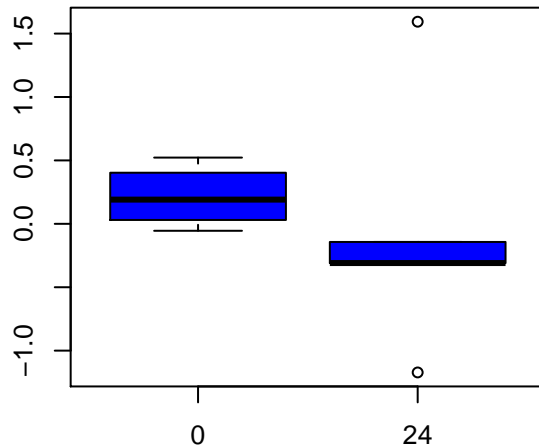

OVCAR

**X - 14588**

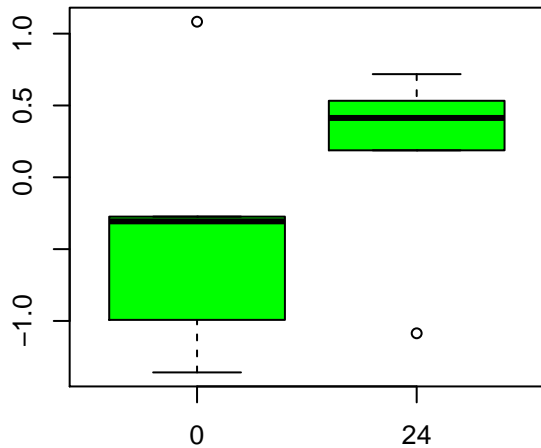

HCT15

**X - 14588**

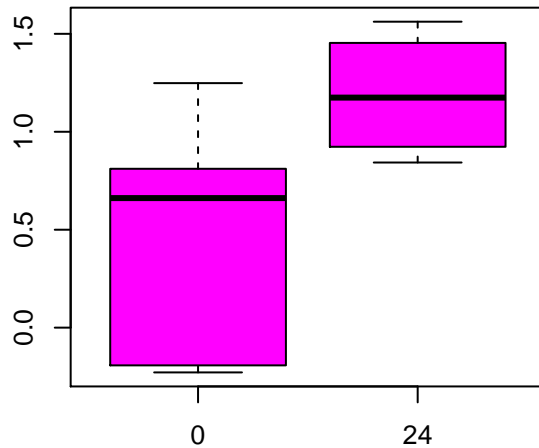

SKOV3

# X - 14588

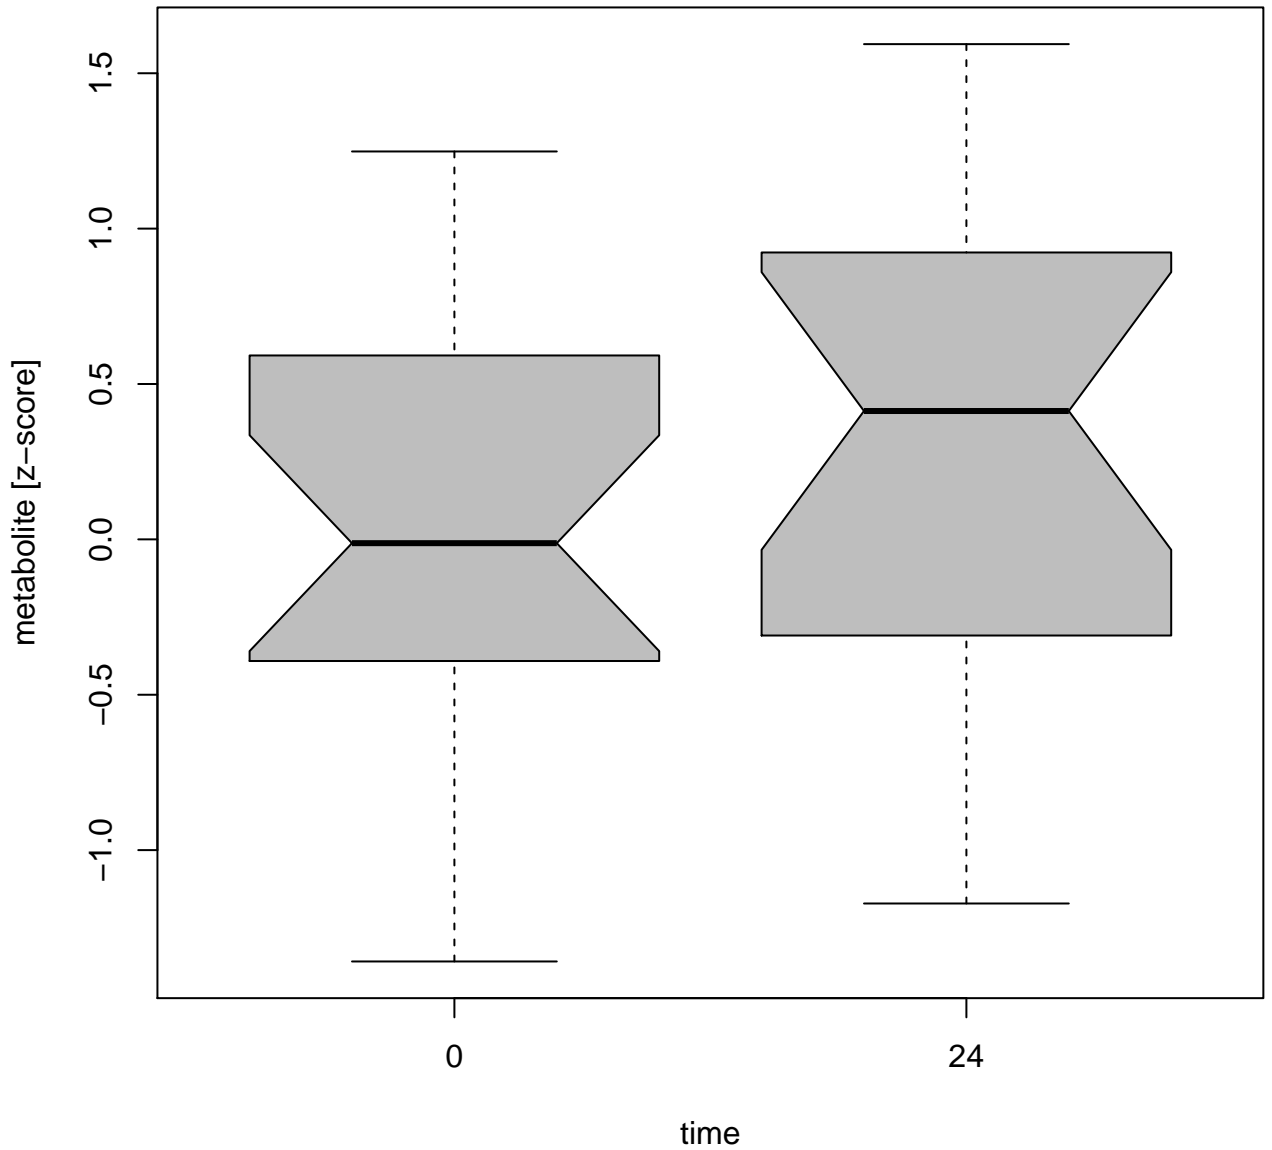

**X - 15375**

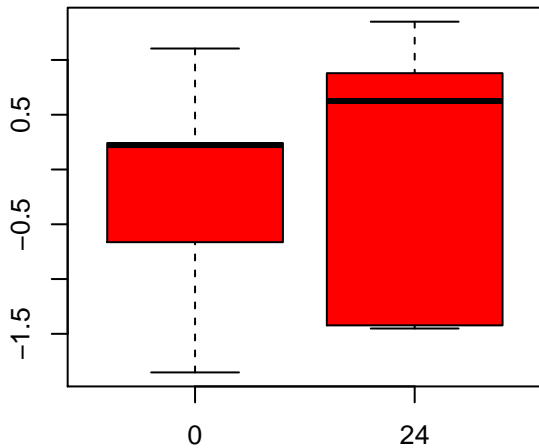

HCT116

**X - 15375**

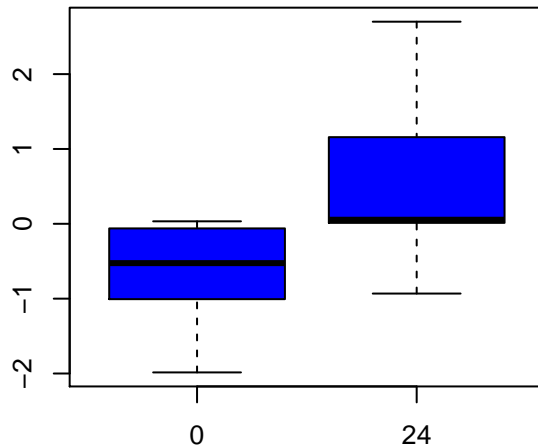

OVCAR

**X - 15375**

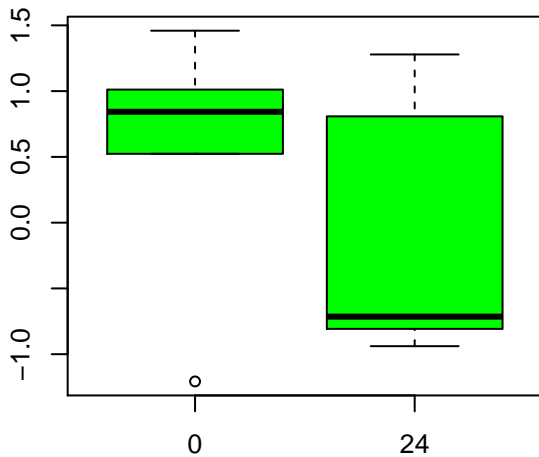

HCT15

**X - 15375**

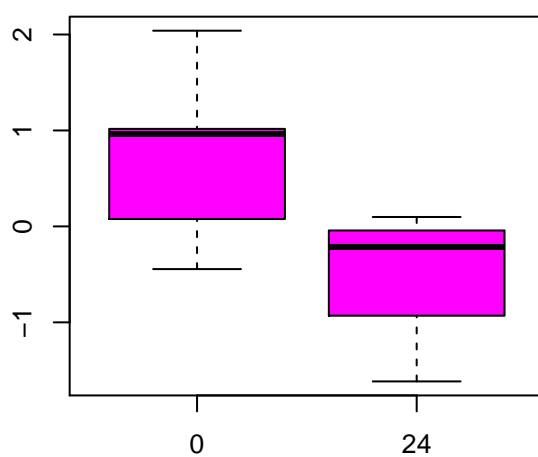

SKOV3

# X - 15375

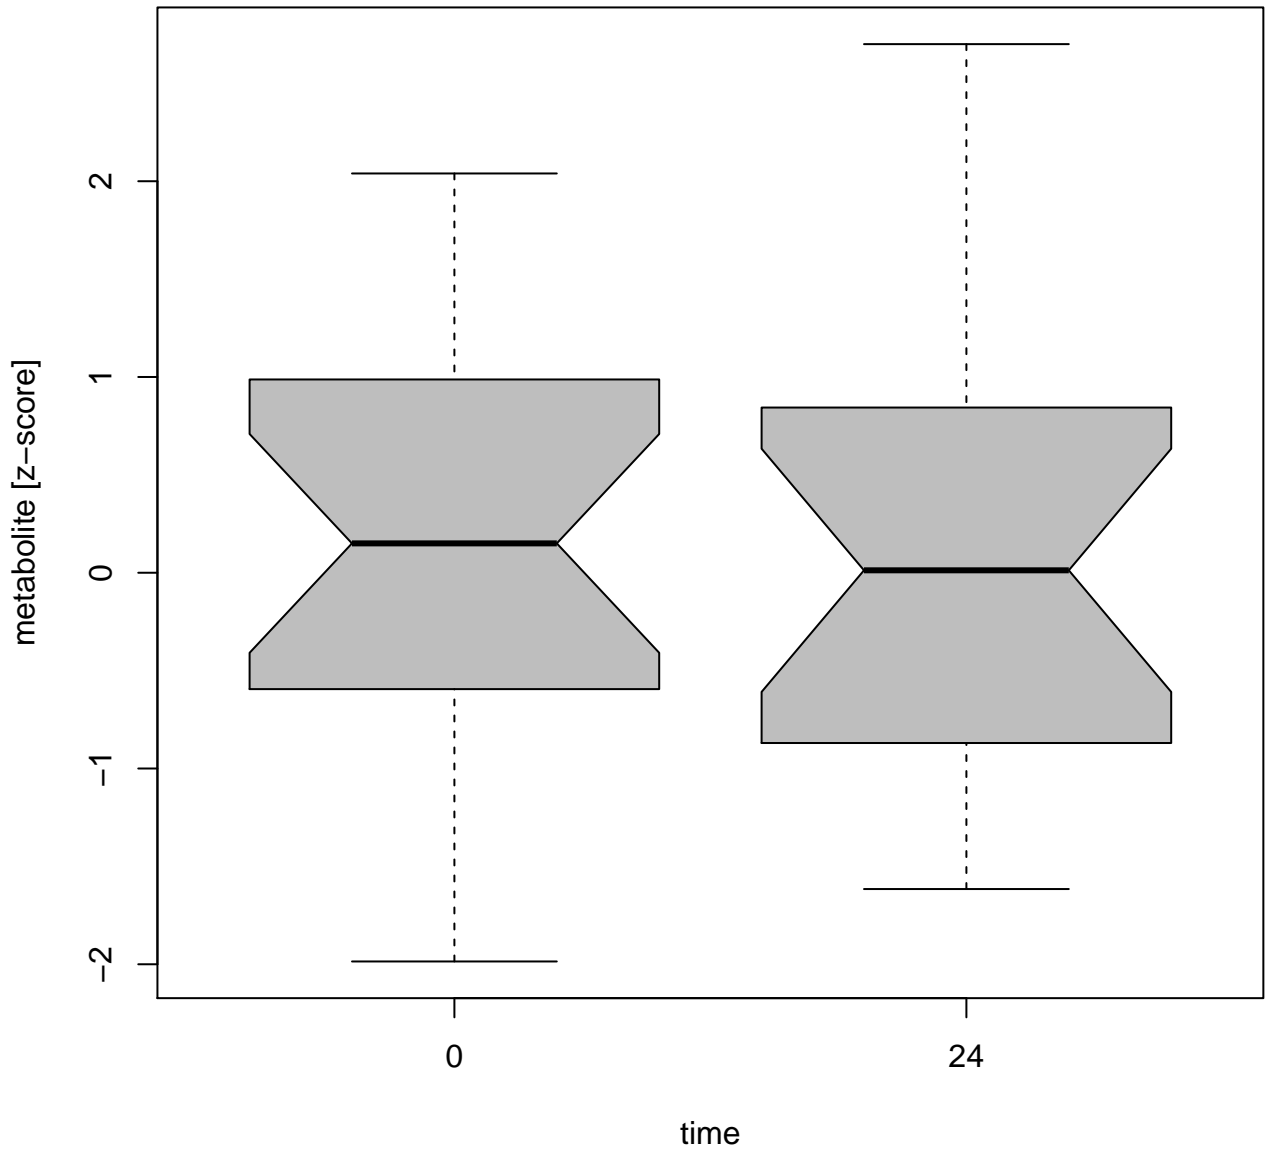

**X - 15564**

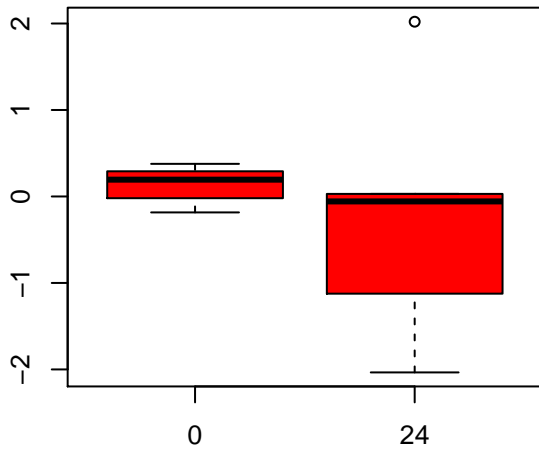

HCT116

**X - 15564**

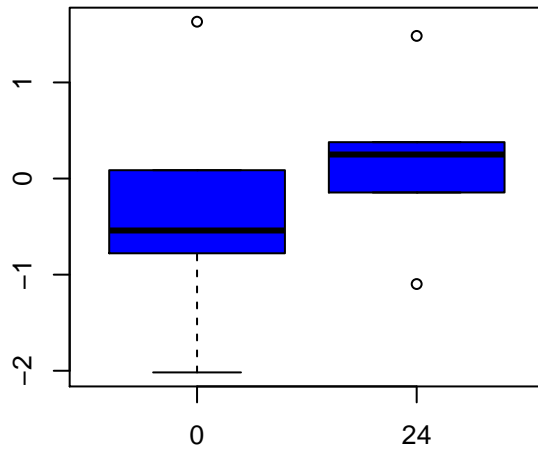

OVCAR

**X - 15564**

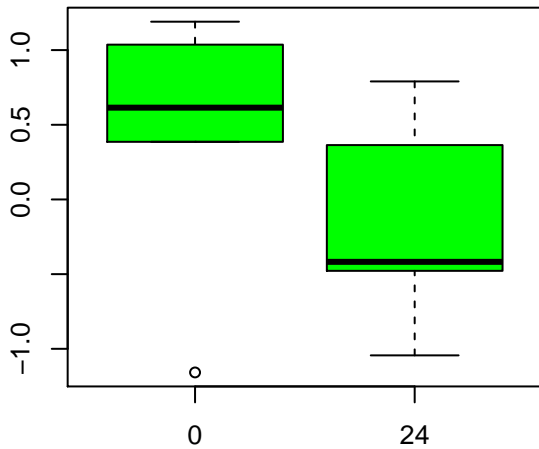

HCT15

**X - 15564**

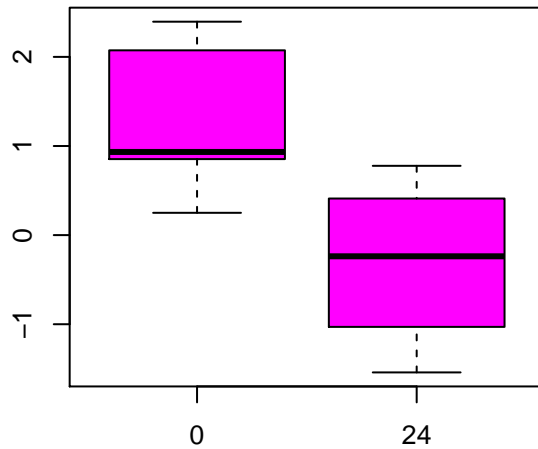

SKOV3

# X - 15564

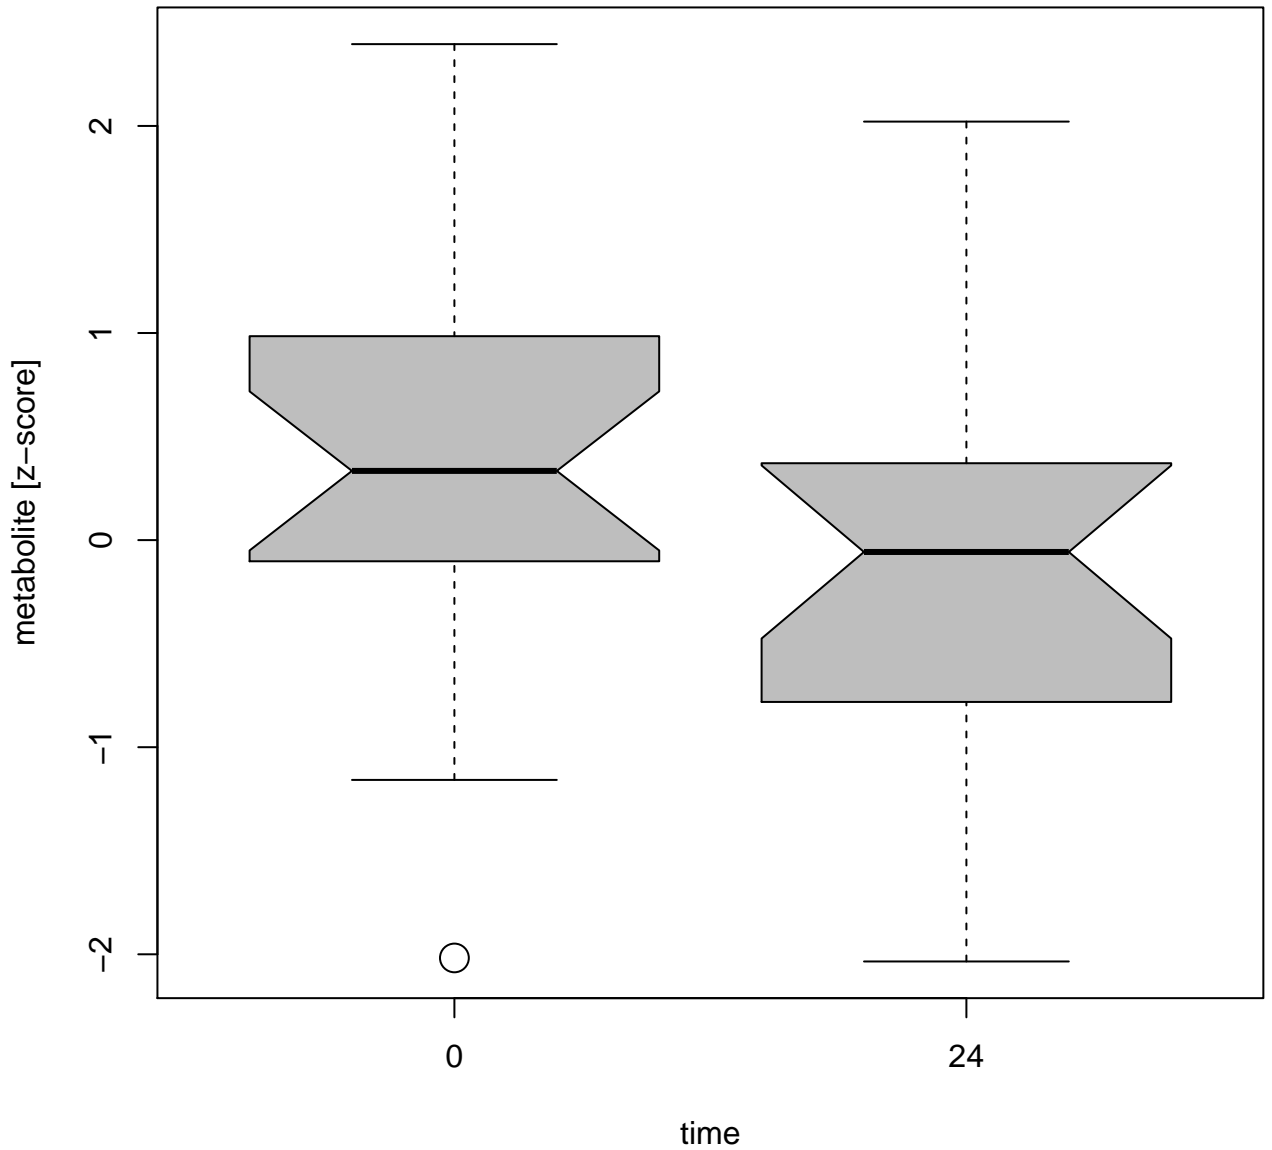

Supplement: srep39999-s8.pdf [file srep39999-s8.pdf]
